# Supplementary material for: 1,3- and 1,4-Benzdiyne equivalents for regioselective synthesis of polycyclic heterocycles
Source: PubMed Central journal article supplement (PMC6020534; doi:10.1039/c6sc00798h), 2016-04-18
Supplement: SC-007-C6SC00798H-s001.pdf [file SC-007-C6SC00798H-s001.pdf]

## Electronic Supplementary Information

### 1,3- and 1,4-Benzdiyne Equivalents for Regioselective Synthesis of Polycyclic Heterocycles

Takashi Ikawa,\* Shigeaki Masuda, Akira Takagi, and Shuji Akai\*

*Graduate School of Pharmaceutical Sciences, Osaka University, Yamadaoka, Suita, Osaka, Japan*

E-mail: ikawa@phs.osaka-u.ac.jp, akai@phs.osaka-u.ac.jp

#### Table of Contents

|                                                                                                                                      |     |
|--------------------------------------------------------------------------------------------------------------------------------------|-----|
| Time-course of the reactions of benzdiyne equivalents <b>1b</b> and <b>15</b> .....                                                  | S2  |
| Other conditions for the reaction of 1,3-benzdiyne equivalents <b>1b</b> .....                                                       | S4  |
| Theoretical analysis of 4,5-benzotriazolynes <b>5b</b> and 4,5-indolynes <b>5b'</b> .....                                            | S5  |
| General considerations.....                                                                                                          | S6  |
| General procedure for Tables and Schemes .....                                                                                       | S7  |
| Experimental details, NMR and numerical data                                                                                         |     |
| Sequential benzyne generation from <b>1a</b> and <b>1b</b> (Scheme 2, Fig. S1 and S2).....                                           | S9  |
| Reactions of 1,3-benzdiyne equivalent <b>1b</b> (Table 1 and Scheme 3).....                                                          | S12 |
| Synthesis of risperidone <b>14</b> from 1,3-benzdiyne equivalent <b>1b</b> (Scheme 4).....                                           | S22 |
| Reactions of 1,4-benzdiyne equivalent <b>15</b> (Table 2).....                                                                       | S25 |
| Synthesis of 1,3-benzdiyne equivalent candidate <b>1a</b> .....                                                                      | S32 |
| Synthesis of 1,3-benzdiyne equivalent <b>1b</b> .....                                                                                | S34 |
| Synthesis of 1,4-benzdiyne equivalent <b>15</b> .....                                                                                | S39 |
| Cartesian coordinates of optimized structures of 4,5-benzotriazolynes <b>5b</b> and 4,5-indolynes <b>5b'</b> by DFT calculation..... | S41 |
| Experimental references.....                                                                                                         | S44 |
| 1D and 2D NMR spectra of new compounds.....                                                                                          | S46 |

## Time-course of the reactions of benzdiyne equivalents **1b** and **15**:

### a) Reaction of 1,3-benzdiyne equivalent **1b** with 2,5-dimethylfuran **6a**

For the evaluation of stepwise benzyne generation from 1,3-benzdiyne equivalent **1b**, the time-course of the reaction of **1b** was monitored by the formation of the Diels–Alder adducts (**10a** and **3a**) of each benzyne (**4a** and **5a**) with 2,5-dimethylfuran **6a** using GC (Fig. S1). We found that **1b** was rapidly consumed to produce **10a**, and its yield reached 72% during the first 30 min without formation of the double cycloaddition product **3a**. Even when **1b** was completely consumed after 2 h, the formation of **3a** was observed in only 5% yield. As we anticipated, the bulky Si(*t*-Bu)Me<sub>2</sub> group directed the first attack of the fluoride ion to the terminal SiMe<sub>3</sub> group to generate **4a** while efficiently retarding the second attack of another fluoride ion to **10a** (see Table 1 in the main text).

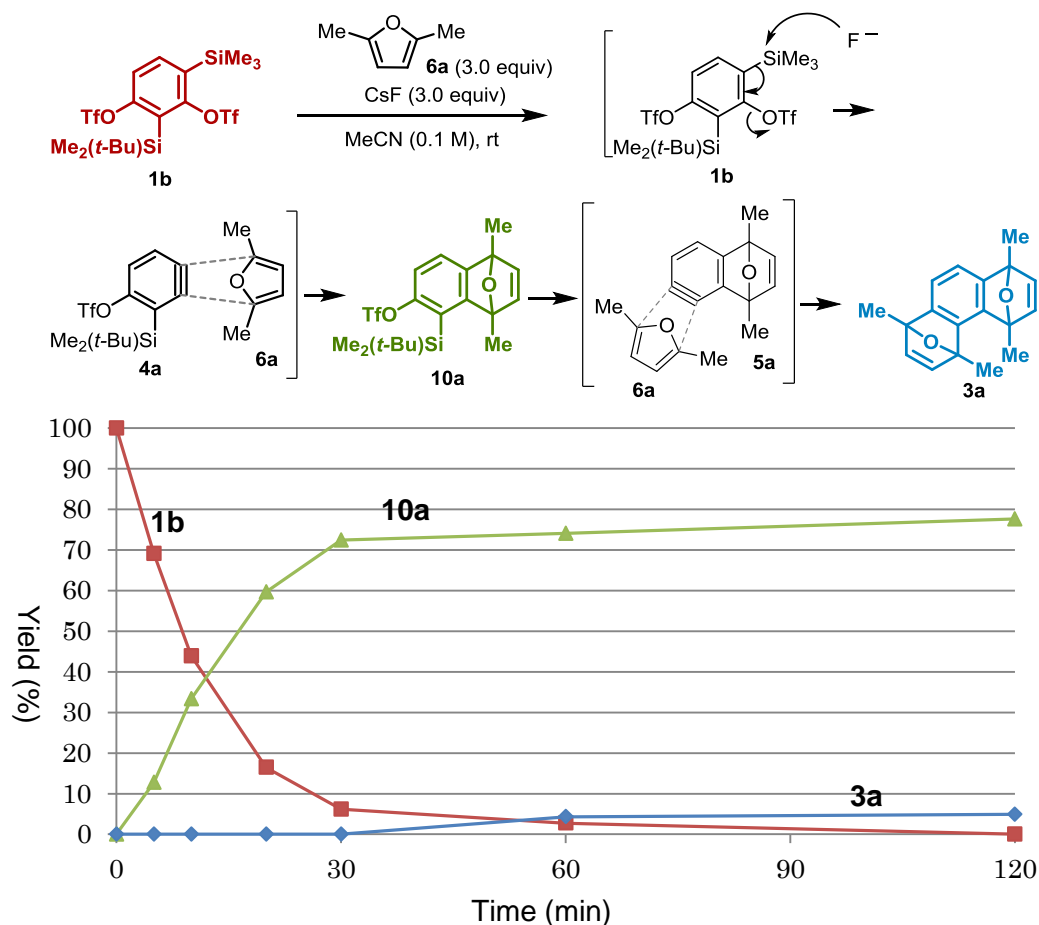

**Fig. S1** Time-course of the reaction of 1,3-benzdiyne equivalent **1b** with 2,5-dimethylfuran **6a**. Conditions: **1b** (56 mg, 0.10 mmol), 2,5-dimethylfuran **6a** (32  $\mu$ L, 0.30 mmol), CsF (46 mg, 0.30 mmol) and decane (21  $\mu$ L, 0.10 mmol) in MeCN (1.0 mL, 0.1 M). The yield was determined by GC analysis with the aid of the internal standard, decane.

## b) Reaction of 1,4-benzdiyne equivalent **15** with 2,5-dimethylfuran **6a**

For the evaluation of stepwise benzyne generation from **15**, the time-course of the reaction of **15** was monitored by the formation of the Diels–Alder adducts (**S1** and **S2**) of each benzyne (**16** and **18d**) with **6a** using GC (Fig. S2). The double cycloaddition product **S2** was not formed during the first 30 min, and was formed in only 2% yield after 1 h, when **15** was exhausted, and only 6% after 2 h. These results suggest that the two electron-withdrawing triflyloxy groups of **15** dramatically increase the Lewis acidity of the SiMe<sub>3</sub> group, which significantly enhances the first benzyne generation. Conversely, the second benzyne generation is relatively slow because **S1** has only one triflyloxy group. This time-course experiment clearly indicates that we can easily install two different aryneophiles on **15**<sup>1</sup> (see Table 2 in the main text).

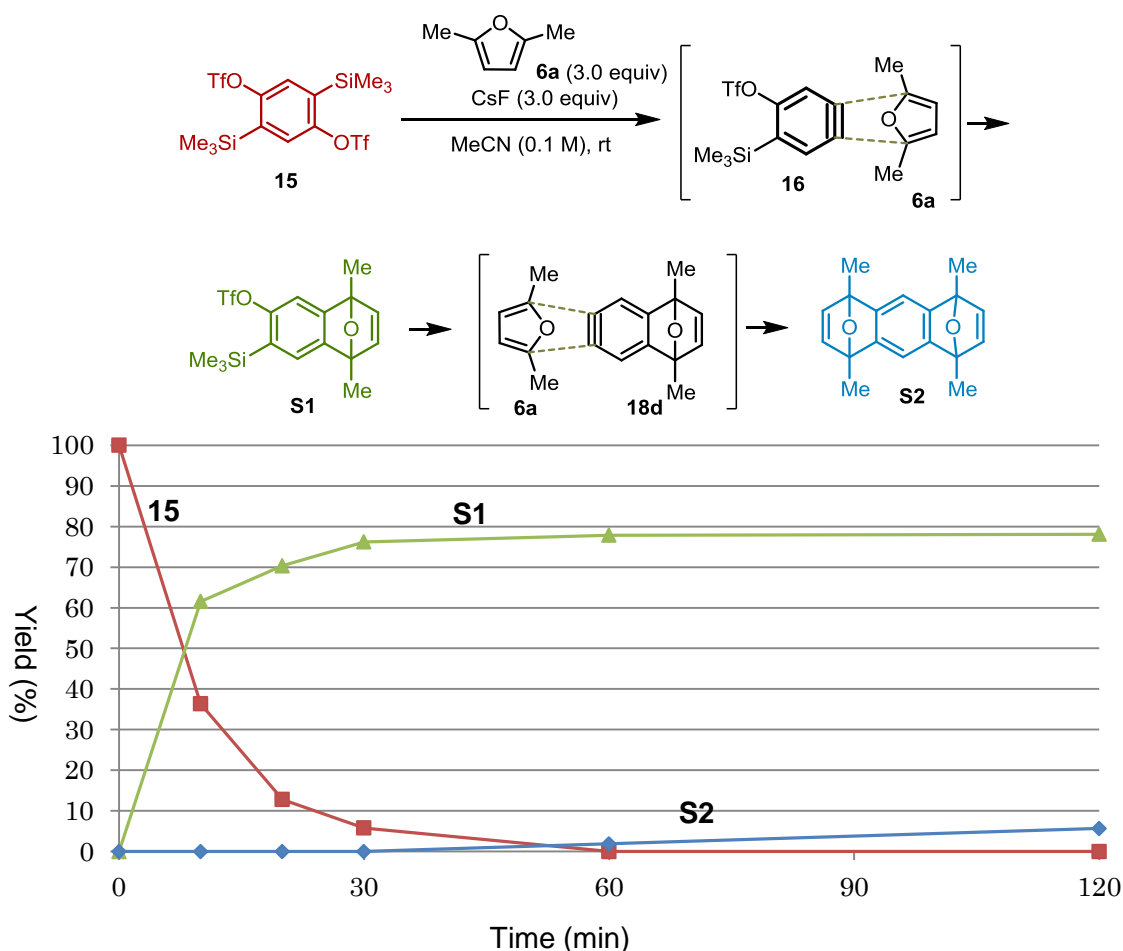

**Fig. S2** Time-course of the reaction of 1,4-benzdiyne equivalent **15** with 2,5-dimethylfuran **6a**.

Conditions: **15** (54 mg, 0.10 mmol), 2,5-dimethylfuran **6a** (32  $\mu$ L, 0.30 mmol), CsF (46 mg, 0.30 mmol) and decane (21  $\mu$ L, 0.10 mmol) in MeCN (1.0 mL, 0.1 M). The yield was determined by GC analysis with the aid of the internal standard, decane.

### Other conditions for the reaction of 1,3-benzdiyne equivalents **1b**:

a) KF (3.0 equiv), 18-crown-6 (3.0 equiv)

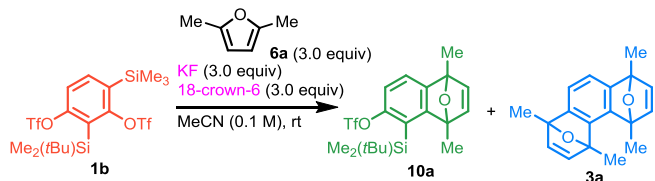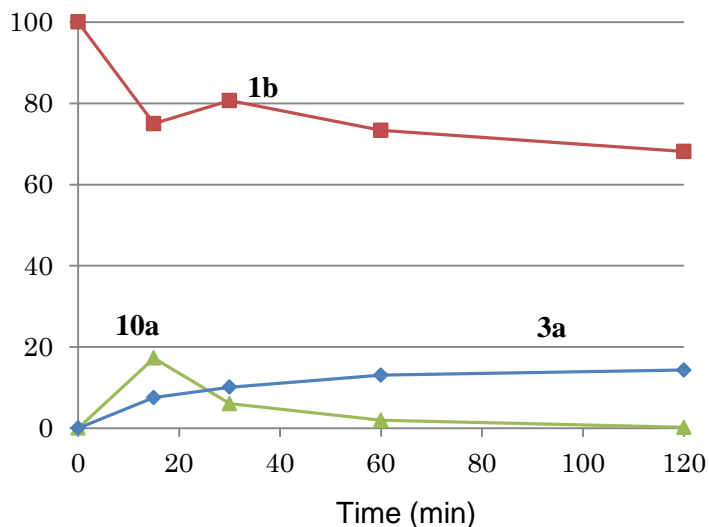

b) BnMe<sub>3</sub>NF (3.0 equiv)

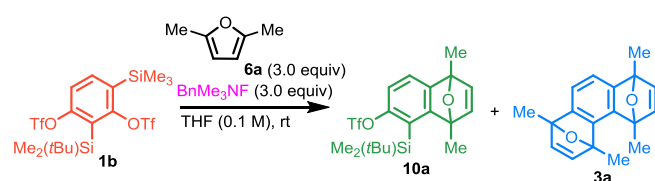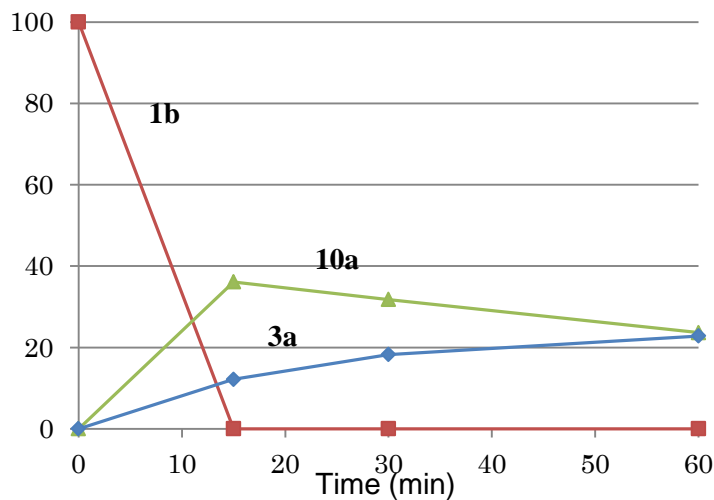

c) CsF (1.5 equiv), Furan (3.0 equiv)

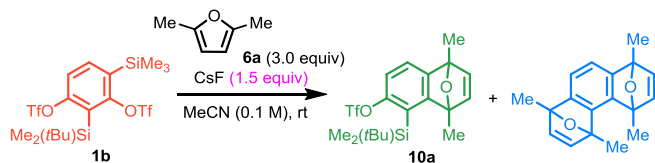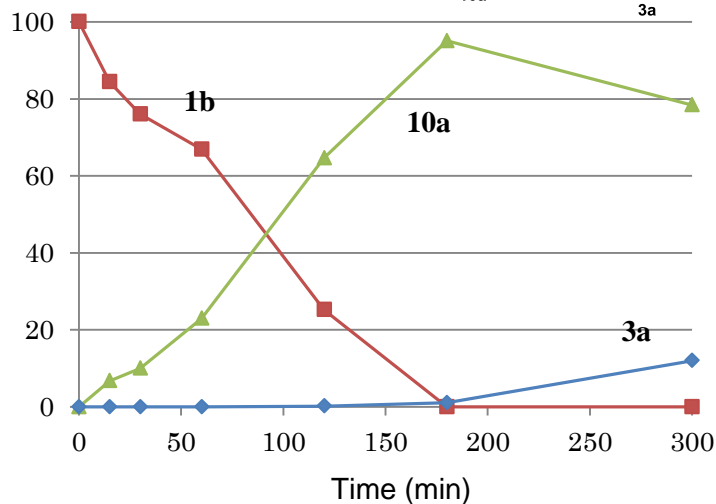

d) CsF (1.5 equiv), Furan (1.5 equiv)

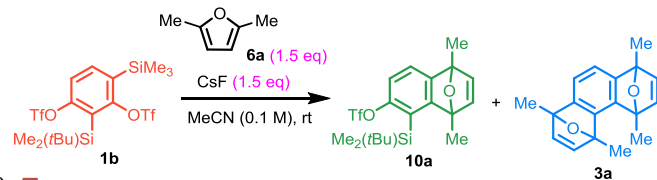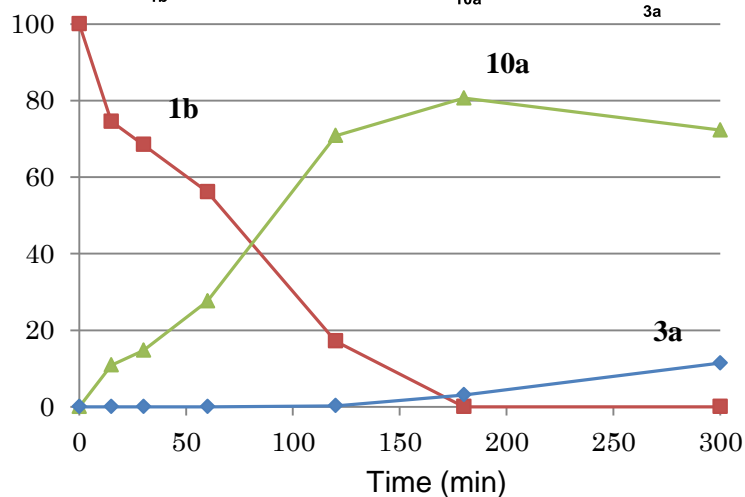

**Fig. S3** Time-course of the reaction of the reaction of 1,3-benzdiyne equivalent **1b** with 2,5-dimethylfuran **6a** under other reaction conditions. Conditions: **1b** (56 mg, 0.10 mmol), 2,5-dimethylfuran **6a**, a fluoride ion and decane (21  $\mu$ L, 0.10 mmol) in MeCN (1.0 mL, 0.1 M). The yield was determined by GC analysis with the aid of the internal standard, decane.

### Theoretical analysis of 4,5-benzotriazolylene **5b** and 4,5-indolyne **5b'**:

New fused benzyne, such as 4,5-benzotriazolylene **5b**, 6,7-benzisoxazolylene **5c**, and 6,7-2*H*-indazolylene **5e**, react with arynophiles **6** with good regioselectivities (Table 1, entries 2-2, 3-2, and 5-2, and Scheme 3), higher than those observed for the sterically similar 4,5-indolyne.<sup>2a,b</sup> To investigate the origins of these differences, distortion<sup>2</sup> and natural bond orbital (NBO) analyses<sup>3-6</sup> of 1-benzyl-4,5-benzotriazolylene **5b** and 1-benzyl-4,5-indolyne **5b'**<sup>2a,b</sup> have been performed, and the results are summarized in Fig. S3. These results suggest that the higher regioselectivities of **5b** than those of **5b'** can be due to the bigger differences between the internal angles at the C4 and C5 positions of **5b** and the bigger differences between the electron densities of reacting orbitals at the C4 and C5 of **5b**.

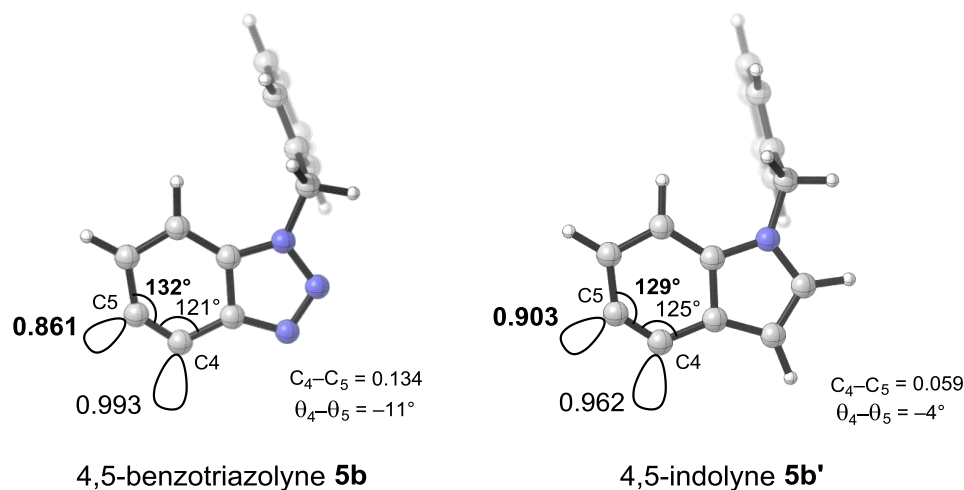

**Fig. S3** Optimized geometry of 4,5-benzotriazolylene **5b** and 4,5-indolyne **5b'**, and their distortion<sup>2</sup> and NBO<sup>3-6</sup> analyses [B3LYP/6-31G(d)]<sup>7,8</sup>

## General considerations:

**Reagents:** All reactions were carried out under an argon or nitrogen atmosphere. A round-bottomed flask containing a magnetic stirrer with a three-way stopcock was used as a reactor. 1.6 and 2.3 M solutions of *n*-BuLi in hexane were purchased from Kanto Chemical. Anhydrous THF, CH<sub>2</sub>Cl<sub>2</sub>, MeCN and DMF were purchased from Kanto Chemicals, and purified with a Glass Contour solvent dispensing system (Nikko Hansen & Co., Ltd., Osaka, Japan) using two packed columns of activated molecular sieves (with an isocyanate column only for DMF). 2,4,6-Trimethylbenzoxonitrile oxide **6c**,<sup>9</sup> 4-(4-methoxyphenyl)-3-phenylsydnone **6e**,<sup>10</sup> and 2-acetyl-4,6-dibromoaniline **6g**,<sup>11</sup> were prepared according to the literature. BnMe<sub>3</sub>NF was dried at 120 °C using an oil bath under reduced pressure overnight. *N*-Bromosuccinimide (NBS) was recrystallized from boiling water before use. All other reagents were purchased from Wako Pure Chemical Industries, Tokyo Chemical Industry, Aldrich Chemical, and Kishida Chemical, and used without further purification. Flash chromatography<sup>12</sup> was performed with silica gel 60N, spherical neutral (40–50 μm), purchased from Kanto Chemical or Yamazen ODS column (100×2.6 cm, i.d.) packed with ODS (50 μm particle size). All reactions were monitored by thin-layer chromatography (TLC) on glass-backed silica gel 60 F254, 0.2 mm plates (Merck), and compounds were visualized under UV light (254 nm). These TLC plates were also used for preparative TLC (PTLC).

**Analytical methods:** Melting points were recorded on a Yanagimoto melting point apparatus and are uncorrected. IR spectra were obtained on a SHIMADZU FTIR-8400S or a SHIMADZU FTIR-IRAffinity-1 or a JASCO FT/IR 4600. <sup>1</sup>H NMR and <sup>13</sup>C NMR spectra were recorded on an Agilent Inova 600 (<sup>13</sup>C: 150 MHz), JEOL JMN-ECA-500 (<sup>1</sup>H: 500 MHz, <sup>13</sup>C: 125 MHz), a JEOL JMN-ECS-400 (<sup>1</sup>H: 400 MHz, <sup>13</sup>C: 100 MHz), or a JEOL AL-300 (<sup>1</sup>H: 300 MHz, <sup>13</sup>C: 75 MHz) instrument with chemical shifts reported in ppm relative to the residual undeuterated solvent. NOESY, ROESY, HMBC, HMQC and TOCSY spectra were taken by a JEOL JMN-ECA-500, a JEOL JMN-ECS-400, an Agilent VNS600 or a Bruker ADVANCE700. GC chromatograms were recorded on a SHIMADZU GC-2010. The mass spectra were recorded on a JEOL JMS-S3000 (MALDI), or a JEOL JMS-700 (FAB) or a JMS-T100TD (APCI) spectrometer. GPC experiment was carried out on LaboACE LC-5060 with JAIGEL-2H columns (Japan Analytical Industry). ‘Yield’ refers to the isolated yields of compounds showing at most only trace peaks in the <sup>1</sup>H NMR

spectra that are not attributable to the assigned structure. <sup>1</sup>H NMR and melting points (where applicable) of all known compounds were taken. All new products were further characterized by high resolution mass spectrum (HRMS). Each regiochemistry of cycloaddition products (**8**, *distal-3b*, *proximal-3b*, *distal-3c*, *distal-3d*, *distal-3e*, *proximal-3e*, *proximal-3g*, *distal-3g*, *distal-10b*, *distal-10c*, *proximal-10c*, *proximal-10d*, *distal-10d*, *distal-10e*, *proximal-10e*, *distal-10f*, *proximal-17a*, *distal-17b*, *proximal-17b*, *proximal-19a*, *distal-19a*, *distal-19b*, *proximal-19b*, *distal-19c'*, *proximal-19c'*) was confirmed by NOESY, those of *distal-17c* and *proximal-17c* were confirmed by HMQC and HMBC, and that of *proximal-3f* was confirmed by TOCSY and ROESY NMR experiments. All 1D and 2D NMR spectra were attached at the end of this material with decisive correlations circled. The structural determinations of *proximal-3c* and *distal-17a* were failed; however, those should be right structures because the structures of corresponding regioisomers, *distal-3c* and *proximal-17a* were successfully defined.

**General Procedures of the reactions of 1,3-benzdiyne equivalent **1b** or 1,4-benzdiyne equivalent **15** with arynophiles **6** (Tables 1, 2 and Schemes 2, 4):**

**General Procedure A:** An oven-dried round-bottom flask was charged with (**1a**), **1b** or **15** (1.0 equiv) [and arynophile **I** (3.0 equiv) in cases where the arynophile **I** was solid] and a stirrer bar. The flask was equipped with a three-way stopcock and evacuated and back-filled with Ar. MeCN [and arynophile **I** (3.0 equiv) in cases where the arynophile **I** was liquid] was added into the flask via a syringe. Then, CsF (3.0 equiv) was quickly added to the flask. The mixture was stirred at rt for 15–30 min. The reaction mixture was passed through a short pad of silica gel using EtOAc and the solvents were removed under reduced pressure. The residue was subjected to <sup>1</sup>H NMR analysis for calculating the ratio of the two regioisomers (*distal*- and *proximal-10* or **17**). The crude product was purified by flash column chromatography on silica gel or PTLC (hexane or CH<sub>2</sub>Cl<sub>2</sub> or a mixture of hexane and EtOAc, hexane and CH<sub>2</sub>Cl<sub>2</sub>, CH<sub>2</sub>Cl<sub>2</sub> and EtOAc, CH<sub>2</sub>Cl<sub>2</sub> and MeOH, or toluene and acetone) to afford *distal*- and *proximal-10* or **17**.

**General Procedure B:** A stirrer bar was placed into the flask with obtained one of the regioisomers **10** or a mixture of regioisomers **17** (1.0 equiv) [and arynophile **II** (3.0 equiv) in cases where the arynophile **II** was solid]. The flask was equipped with a three-way stopcock and evacuated and back-filled with Ar. MeCN [and arynophile **II** (3.0 equiv) in cases where the arynophile **II** was liquid] was added into the flask via a syringe. Then, CsF (3.0 equiv) was quickly added to the flask. The

mixture was stirred at rt for 3–24 h. The reaction mixture was passed through a short pad of silica gel using EtOAc and the solvents were removed under reduced pressure. The residue was subjected to <sup>1</sup>H NMR analysis for calculating the ratio of the two regioisomers (*distal*- and *proximal*-**3** or **19**). The crude product was purified by flash column chromatography on silica gel and/or PTLC (hexane or CH<sub>2</sub>Cl<sub>2</sub> or a mixture of hexane and EtOAc, hexane and CH<sub>2</sub>Cl<sub>2</sub>, CH<sub>2</sub>Cl<sub>2</sub> and EtOAc, CH<sub>2</sub>Cl<sub>2</sub> and MeOH, or toluene and acetone) to afford *distal*- and *proximal*-**3** or **19**.

**General Procedures of one-pot operation for reactions of 1,3-benzdiyne equivalent **1b** or 1,4-benzdiyne equivalent **15** with arynophiles **6** (Scheme 3 and Table 2, entry 1):**

**General Procedure C:** An oven-dried round-bottom flask was charged with **1b** or **15** (1.0 equiv) [and arynophile **6** (1.1 equiv) in cases where the arynophile **6** was solid] and a stirrer bar. The flask was equipped with a three-way stopcock and evacuated and back-filled with Ar. MeCN [and arynophile **6** (1.1 equiv) in cases where the arynophile **6** was liquid] was added into the flask via a syringe. Then, CsF (4.0 equiv) was quickly added to the flask. After the mixture was stirred for 30 min at rt, another arynophile **6** (3.0 equiv) was added via a syringe [18-crown-6 (4.0 equiv) was also added in some case] and stirred for several hours. The reaction mixture was passed through a short pad of silica gel using EtOAc and the solvents were removed under reduced pressure. The residue was subjected to <sup>1</sup>H NMR analysis for calculating the ratio of the two regioisomers (*distal*- and *proximal*-**3** or **19**). The crude product was purified by flash column chromatography on silica gel and/or PTLC (a mixture of hexane and EtOAc or CH<sub>2</sub>Cl<sub>2</sub> and EtOAc) to afford *distal*- and *proximal*-**3** or **19**.



Sequential benzyne generation from **1a** and **1b** (Scheme 2, Fig. S1 and S2):

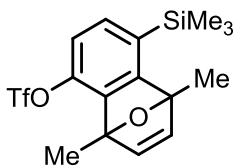

**8**

**1,4-Dimethyl-8-(trimethylsilyl)-1,4-dihydro-5-(trifluoromethanesulfonyloxy)1,4-**

**epoxynaphthalene (8) (Scheme 2):** Following General Procedure A, a mixture of CsF (46 mg, 0.30 mmol), 2,5-dimethylfuran **6a** (32  $\mu$ L, 0.30 mmol) and 2,4-bis(trimethylsilyl)-1,3-bis(trifluoromethanesulfonyloxy)benzene **1a** (52 mg, 0.10 mmol) was stirred in MeCN (1.0 mL, 0.10 M) for 10 h at rt. The crude product was purified by column chromatography on silica gel (hexane/EtOAc = 10:1) to provide the titled compound **8** as a colorless oil (16 mg, 41%) and its regiochemistry was determined by NOESY spectra.  $^1\text{H}$  NMR (500 MHz,  $\text{CDCl}_3$ )  $\delta$ : 0.36 (9 H, s), 2.026 (3 H, s), 2.029 (3 H, s), 6.80 (1 H, d,  $J = 8.5$  Hz), 6.81 (1 H, d,  $J = 5.0$  Hz), 6.86 (1 H, d,  $J = 5.0$  Hz), 7.18 (1 H, d,  $J = 8.5$  Hz).  $^{13}\text{C}$  NMR (125 MHz,  $\text{CDCl}_3$ )  $\delta$ : 1.03, 16.6, 18.6, 88.1, 90.8, 117.2, 118.5 (q,  $J = 320$  Hz), 131.9, 133.8, 143.3, 143.5, 146.5, 147.0, 163.9.  $^{19}\text{F}$  NMR (470 MHz,  $\text{CDCl}_3$ )  $\delta$ : -73.0. IR (neat): 2950, 1424  $\text{cm}^{-1}$ . HRMS (MALDI) Calcd for  $\text{C}_{16}\text{H}_{20}\text{F}_3\text{O}_4\text{SSi}$   $[\text{M}+\text{H}]^+$ : 393.0798, found 393.0800.

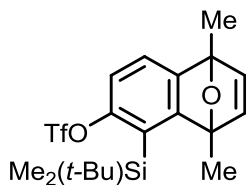

**10a**

**1,4-Dimethyl-5-(tert-butyl dimethylsilyl)-1,4-dihydro-6-(trifluoromethanesulfonyloxy)1,4-**

**epoxynaphthalene (10a) (Scheme 2, Table 1, entry 1-1):** Following General Procedure A, a mixture of CsF (91 mg, 0.60 mmol), 2,5-dimethylfuran **6a** (65  $\mu$ L, 0.60 mmol) and 2-(tert-butyl dimethylsilyl)-4-(trimethylsilyl)-1,3-bis(trifluoromethanesulfonyloxy)benzene **1b** (0.11 g, 0.20 mmol) was stirred in MeCN (2.0 mL) for 0.5 h at rt. The crude product was purified by column chromatography on silica gel (hexane/EtOAc = 20:1) to provide the titled compound **10a** as a colorless solid (67 mg, 78%). Mp: 79–82  $^\circ\text{C}$ .  $^1\text{H}$  NMR (300 MHz,  $\text{CDCl}_3$ )  $\delta$ : 0.36 (3 H, s), 0.39 (3 H, s),

s), 1.08 (9 H, s), 1.87 (3 H, s), 2.02 (3 H, s), 6.78 (1 H, d,  $J = 5.5$  Hz), 6.87 (1 H, d,  $J = 5.5$  Hz), 7.05 (1 H, d,  $J = 8.0$  Hz), 7.12 (1 H, d,  $J = 8.0$  Hz).  $^{13}\text{C}$  NMR (75 MHz,  $\text{CDCl}_3$ )  $\delta$ : 0.14, 0.85, 15.2, 18.3, 19.8, 28.3, 86.2, 91.4, 113.2, 118.6 (q,  $J = 322$  Hz), 119.4, 124.3, 145.6, 147.3, 150.6, 154.3, 164.5.  $^{19}\text{F}$  NMR (376 MHz,  $\text{CDCl}_3$ )  $\delta$ :  $-73.1$ . IR (neat): 2933, 2861  $\text{cm}^{-1}$ . HRMS (MALDI) Calcd for  $\text{C}_{19}\text{H}_{26}\text{F}_3\text{O}_4\text{SSi}$   $[\text{M}+\text{H}]^+$ : 435.1268, found 435.1260.

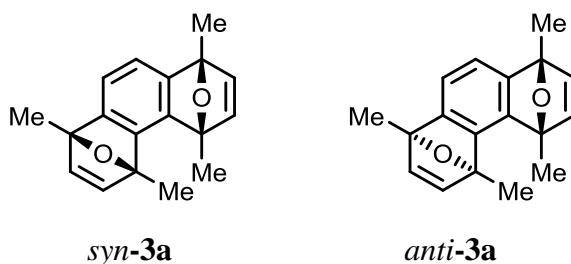

**1,4,5,8-Tetramethyl-1,4,5,8-tetrahydro-1,4:5,8-diepoxyphenanthrene (3a) (Scheme 2):** Following General Procedure B, a mixture of  $\text{CsF}$  (31 mg, 0.20 mmol), 2,5-dimethylfuran **6a** (22  $\mu\text{L}$ , 0.20 mmol), and **10a** (29 mg, 67  $\mu\text{mol}$ ) was stirred in  $\text{MeCN}$  (0.67 mL) for 19 h at rt. The crude product was purified by column chromatography on silica gel (hexane/ $\text{EtOAc} = 6:1$ ) to provide the titled compound **3a** as a colorless solid (16 mg, 90%, 49:51 diastereomer mixture, determined by 500 MHz  $^1\text{H}$  NMR analysis). Using 1.5 equiv of  $\text{CsF}$ , 22% of **10a** was recovered after 48 h. Mp: 88–92  $^\circ\text{C}$ .  $^1\text{H}$  NMR (500 MHz,  $\text{CDCl}_3$ )  $\delta$ : 1.83 (6/2 H, s), 1.84 (6/2 H, s), 1.99 (6/2 H, s), 2.05 (6/2 H, s), 6.60 (2/2 H, d,  $J = 5.5$  Hz), 6.65–6.69 (10/2 H, m).  $^{13}\text{C}$  NMR (125 MHz,  $\text{CDCl}_3$ )  $\delta$ : 15.5, 15.6, 18.8, 19.8, 87.9, 88.1, 88.8, 89.3, 113.9, 114.1, 143.5, 145.2, 146.3, 146.4, 146.7, 149.4, 150.6. IR (neat): 2978, 1384  $\text{cm}^{-1}$ . HRMS (MALDI) Calcd for  $\text{C}_{18}\text{H}_{19}\text{O}_2$   $[\text{M}+\text{H}]^+$ : 267.1380, found 267.1378.

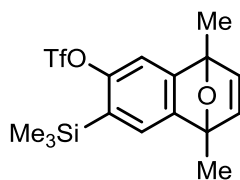

**S1**

**1,4-Dimethyl-7-(trimethylsilyl)-1,4-dihydro-1,4-epoxynaphthalen-6-yl trifluoromethanesulfonate (S1) (Fig. S2):** Following General Procedure A, a mixture of  $\text{CsF}$  (0.18 g, 1.2 mmol), 2,5-dimethylfuran **6a** (0.12 mL, 1.2 mmol) and 2,4-bis(trimethylsilyl)-1,3-bis(trifluoromethanesulfonyloxy)benzene **15** (0.20 g, 0.38 mmol) was stirred in  $\text{MeCN}$  (3.8 mL) for

10 min at rt. The crude product was purified by column chromatography on silica gel (hexane/EtOAc = 10:1) to provide the titled compound **S1** as a white solid (0.11 g, 74%). Mp: 81–83 °C. <sup>1</sup>H NMR (400 MHz, CDCl<sub>3</sub>) δ: 0.34 (9 H, s), 1.87 (3 H, s), 1.90 (3 H, s), 6.77 (1 H, d, *J* = 5.5 Hz), 6.80 (1 H, d, *J* = 5.5 Hz), 7.07 (1 H, s), 7.17 (1 H, s). <sup>13</sup>C NMR (100 MHz, CDCl<sub>3</sub>) δ: –0.75, 15.0, 15.1, 88.5, 88.6, 111.1, 118.4 (q, *J* = 319 Hz), 124.1, 127.9, 146.3, 146.9, 151.6, 152.4, 157.5. <sup>19</sup>F NMR (376 MHz, CDCl<sub>3</sub>) δ: –73.9. IR (neat): 2979, 1420 cm<sup>–1</sup>. HRMS (FAB, NBA) Calcd for C<sub>16</sub>H<sub>20</sub>F<sub>3</sub>O<sub>4</sub>SSi [M+H]<sup>+</sup>: 393.0798, found 393.0795.

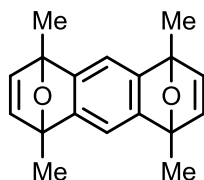

**S2**

**1,4,5,8-Tetramethyl-1,4,5,8-tetrahydro-1,4:5,8-diepoxyanthracene (S2) (Fig. S2):** Following General Procedure B, a mixture of CsF (17 mg, 0.11 mmol), 2,5-dimethylfuran **6a** (12 μL, 0.11 mmol), and **S1** (15 mg, 38 μmol) was stirred in MeCN (0.38 mL) for 20 h at rt. The crude product was purified by column chromatography on silica gel (hexane/EtOAc = 5:1) to provide the titled compound **S2** as a white solid (8.6 mg, 85%, 65:35 diastereomer mixture, determined by 400 MHz <sup>1</sup>H NMR analysis). Mp: 180 °C (decomp.). <sup>1</sup>H NMR (400 MHz, CDCl<sub>3</sub>) δ: 1.86 (12/3 H, s), 1.87 (24/3 H, s), 6.77 (4/3 H, s), 6.78 (8/3 H, s), 6.96 (6/3 H, s). <sup>13</sup>C NMR (100 MHz, CDCl<sub>3</sub>) δ: 15.4, 15.5, 88.78, 88.81, 110.4, 110.7, 147.3, 147.5, 151.19, 151.21. IR (neat): 2976, 1381 cm<sup>–1</sup>. HRMS (MALDI) Calcd for C<sub>18</sub>H<sub>19</sub>O<sub>2</sub> [M+H]<sup>+</sup>: 267.1380, found 267.1378.

Reactions of 1,3-benzdiazine equivalent **1b** (Table 1, Scheme 3):

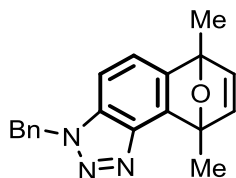

*distal-3b*

**3-Benzyl-6,9-dimethyl-6,9-dihydro-3H-6,9-epoxynaphtho[1,2-*d*][1,2,3]triazole (*distal-3b*)** (Table 1, entry 1-2): Following General Procedure B, a mixture of CsF (0.14 g, 0.90 mmol), benzyl azide **6b** (0.11 mL, 0.90 mmol), and **10a** (0.13 g, 0.30 mmol) was stirred in MeCN (3.0 mL) for 24 h at rt. The crude product (*distal-3b*/*proximal-3b* = 87:13, determined by 400 MHz <sup>1</sup>H NMR analysis) was purified by PTLC (CH<sub>2</sub>Cl<sub>2</sub>/EtOAc = 10:1) and ODS column (H<sub>2</sub>O/MeOH = 63:37 to 32:68) and PTLC (CH<sub>2</sub>Cl<sub>2</sub>) to provide the titled compound *distal-3b* as a colorless oil (38 mg, 43%) and its regiochemistry was determined by NOESY spectra. <sup>1</sup>H NMR (500 MHz, CDCl<sub>3</sub>) δ: 1.97 (3 H, s), 2.35 (3 H, s), 5.81 (2 H, s), 6.91 (1 H, d, *J* = 5.5 Hz), 6.98 (1 H, d, *J* = 8.0 Hz), 7.02 (1 H, d, *J* = 5.5 Hz), 7.23–7.33 (m, 6 H). <sup>13</sup>C NMR (125 MHz, CDCl<sub>3</sub>) δ: 15.6, 16.8, 52.4, 89.6, 89.7, 105.2, 118.2, 127.5, 128.4, 128.9, 131.9, 134.7, 141.1, 145.3, 147.6, 148.7, 150.8. IR (neat): 2956, 1455 cm<sup>-1</sup>. HRMS (MALDI) Calcd for C<sub>19</sub>H<sub>17</sub>N<sub>3</sub>ONa [M+Na]<sup>+</sup>: 326.1264, found 326.1266.

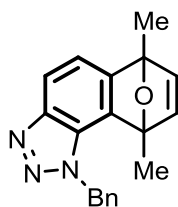

*proximal-3b*

**1-Benzyl-6,9-dimethyl-6,9-dihydro-1H-6,9-epoxynaphtho[1,2-*d*][1,2,3]triazole (*proximal-3b*)** (Table 1, entry 1-2) was obtained from the above-mentioned reaction mixture as a colorless oil (18 mg, 20%) and its regiochemistry was determined by NOESY spectra. <sup>1</sup>H NMR (500 MHz, CDCl<sub>3</sub>) δ: 1.946 (3 H, s), 1.953 (3 H, s), 5.92 (1 H, d, *J* = 17.0 Hz), 6.25 (1 H, d, *J* = 5.0 Hz), 6.27 (1 H, d, *J* = 17.0 Hz), 6.80 (1 H, d, *J* = 5.0 Hz), 6.81 (2 H, dd, *J* = 7.5 Hz, 3.5 Hz), 7.29–7.33 (m, 5 H), 7.85 (1 H, d, *J* = 8.0 Hz). <sup>13</sup>C NMR (125 MHz, CDCl<sub>3</sub>) δ: 15.4, 18.4, 53.2, 89.3, 89.7, 115.8, 117.3, 125.5,

127.9, 128.0, 129.0, 136.0, 136.2, 146.8, 147.2, 148.5, 155.7. IR (neat): 2925, 1437  $\text{cm}^{-1}$ . HRMS (MALDI) Calcd for  $\text{C}_{19}\text{H}_{17}\text{N}_3\text{ONa}$   $[\text{M}+\text{Na}]^+$ : 304.1444, found 304.1438.

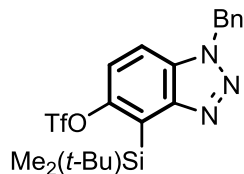

*distal-10b*

**1-Benzyl-4-(tert-butyl dimethylsilyl)-5-(trifluoromethanesulfonyloxy)benzotriazole (*distal-10b*)**

(Table 1, entry 2-1): Following General Procedure A, a mixture of CsF (96 mg, 0.60 mmol), benzyl azide **6b** (75  $\mu\text{L}$ , 0.60 mmol), and 2-(tert-butyl dimethylsilyl)-4-(trimethylsilyl)-1,3-bis(trifluoromethanesulfonyloxy)benzene **1b** (0.11 g, 0.20 mmol) was stirred in MeCN (2.0 mL) for 2 h at rt. The crude product (*distal-10b/proximal-10b* = >98:2, determined by 300 MHz  $^1\text{H}$  NMR analysis) was purified by column chromatography on silica gel (hexane/EtOAc = 10:1) to provide the titled compound *distal-10b* as a brown solid (74 mg, 79%) and its regiochemistry was determined by NOESY spectra. Mp: 80–81°C.  $^1\text{H}$  NMR (500 MHz,  $\text{CDCl}_3$ )  $\delta$ : 0.65 (6 H, s), 0.96 (9 H, s), 5.83 (2 H, s), 7.30–7.39 (7 H, m).  $^{13}\text{C}$  NMR (125 MHz,  $\text{CDCl}_3$ )  $\delta$ : -2.53, 18.2, 27.0, 52.6, 111.8, 118.4 (q,  $J = 320$  Hz), 119.8, 123.6, 127.7, 128.7, 129.2, 130.2, 134.1, 151.2, 151.6.  $^{19}\text{F}$  NMR (376 MHz,  $\text{CDCl}_3$ )  $\delta$ : -73.8. IR (neat): 2930, 1418  $\text{cm}^{-1}$ . HRMS (MALDI) Calcd for  $\text{C}_{20}\text{H}_{25}\text{F}_3\text{N}_3\text{O}_3\text{SSi}$   $[\text{M}+\text{H}]^+$ : 472.1332, found 472.1339.

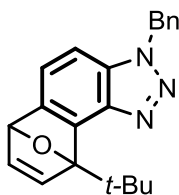

*proximal-3c*

**3-Benzyl-9-(tert-butyl)-6,9-dihydro-3H-6,9-epoxynaphtho[1,2-d][1,2,3]triazole (*proximal-3c*)**

(Table 1, entry 2-2): Following General Procedure B, a mixture of CsF (32 mg, 0.21 mmol), 2-tert-butylfuran **6f** (30  $\mu\text{L}$ , 0.21 mmol), and *distal-10b* (33 mg, 71  $\mu\text{mol}$ ) was stirred in MeCN (1.0 mL) for 18 h at rt. The crude product (*distal-3c/proximal-3c* = 24:76, determined by 400 MHz  $^1\text{H}$  NMR analysis) was purified by column chromatography on silica gel (hexane/EtOAc = 3:1) to provide the

titled compound *proximal-3c* as a colorless solid (16 mg, 68%). Mp: 180–182 °C. <sup>1</sup>H NMR (500 MHz, CDCl<sub>3</sub>) δ: 1.51 (9 H, s), 5.76 (1 H, d, *J* = 15.5 Hz), 5.82 (s, 1 H), 5.83 (1 H, d, *J* = 15.5 Hz), 7.02 (1 H, d, *J* = 8.0 Hz), 7.12–7.25 (2 H, m), 7.26–7.35 (6 H, m). <sup>13</sup>C NMR (125 MHz, CDCl<sub>3</sub>) δ: 26.6, 32.4, 52.3, 82.2, 102.9, 105.6, 119.6, 127.6, 128.4, 128.9, 131.9, 134.7, 141.3, 142.6, 143.7, 146.2, 150.5. IR (neat): 2958, 1507 cm<sup>-1</sup>. HRMS (MALDI) Calcd for C<sub>21</sub>H<sub>22</sub>N<sub>3</sub>O [M+H]<sup>+</sup>: 332.1757, found 332.1757.

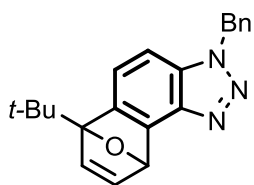

*distal-3c*

**3-Benzyl-6-(*tert*-butyl)-6,9-dihydro-3*H*-6,9-epoxynaphtho[1,2-*d*][1,2,3]triazole (*distal-3c*)** (Table 1, entry 2-2) was obtained from the above-mentioned reaction mixture as a colorless solid (5.0 mg, 21%) and its regiochemistry was determined by NOESY spectra. Mp: 140–142 °C. <sup>1</sup>H NMR (500 MHz, CDCl<sub>3</sub>) δ: 1.30 (9 H, s), 5.80 (2 H, s), 6.36 (1 H, d, *J* = 1.5 Hz), 6.96 (1 H, d, *J* = 8.5 Hz), 7.10 (1 H, d, *J* = 5.5 Hz), 7.19 (1 H, dd, *J* = 1.5, 5.5 Hz), 7.26–7.35 (5 H, m), 7.56 (1 H, d, *J* = 8.5 Hz). <sup>13</sup>C NMR (125 MHz, CDCl<sub>3</sub>) δ: 26.7, 32.5, 52.4, 80.0, 100.6, 104.7, 121.3, 127.6, 128.5, 129.0, 131.2, 134.6, 141.0, 144.6, 144.8, 145.5, 147.1. IR (neat): 2959, 1455 cm<sup>-1</sup>. HRMS (MALDI) Calcd for C<sub>21</sub>H<sub>22</sub>N<sub>3</sub>O [M+H]<sup>+</sup>: 332.1757, found 332.1752.

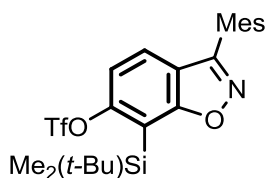

*distal-10c*

**7-(*tert*-Butyldimethylsilyl)-3-mesitylbenzo[*d*]isoxazol-6-yl trifluoromethanesulfonate (*distal-10c*)** (Table 1, entry 3-1): Following General Procedure A, a mixture of CsF (47 mg, 0.30 mmol), 2,4,6-trimethylphenylnitrileoxide **6c**<sup>9</sup> (48 mg, 0.30 mmol), and 2-(*tert*-butyldimethylsilyl)-4-(trimethylsilyl)-1,3-bis(trifluoromethanesulfonyloxy)benzene **1b** (57 mg, 0.10 mmol) was stirred in MeCN (1.0 mL) for 0.5 h at rt. The crude product (*distal-10c/proximal-10c* = 89:11, determined by 300 MHz <sup>1</sup>H NMR analysis) was purified by PTLC (hexane/EtOAc = 10:1) to provide the titled

compound *distal-10c* as a yellow oil (24 mg, 49%) and its regiochemistry was determined by NOESY spectra.  $^1\text{H}$  NMR (500 MHz,  $\text{CDCl}_3$ )  $\delta$ : 0.64 (6 H, s), 0.98 (9 H, s), 2.08 (6 H, s), 2.38 (3 H, s), 7.02 (2 H, s), 7.35 (1 H, d,  $J = 8.5$  Hz), 7.43 (1 H, d,  $J = 8.5$  Hz).  $^{13}\text{C}$  NMR (125 MHz,  $\text{CDCl}_3$ )  $\delta$ : -3.38, 18.4, 20.1, 21.2, 26.6, 113.0, 115.8, 118.5 (q,  $J = 320$  Hz), 119.8, 123.4, 124.1, 128.6, 137.6, 139.6, 156.3, 157.6, 168.4.  $^{19}\text{F}$  NMR (470 MHz,  $\text{CDCl}_3$ )  $\delta$ : -73.5. IR (neat): 2929, 1424  $\text{cm}^{-1}$ . HRMS (MALDI) Calcd for  $\text{C}_{23}\text{H}_{29}\text{F}_3\text{NO}_4\text{SSi}$   $[\text{M}+\text{H}]^+$ : 500.1533, found 500.1531.

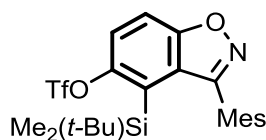

*proximal-10c*

**4-(*tert*-Butyldimethylsilyl)-3-mesitylbenzo[*d*]isoxazol-5-yl trifluoromethanesulfonate (*proximal-10c*)** (Table 1, entry 3-1) was obtained from the above-mentioned reaction mixture as a yellow oil (3.1 mg, 6%) and its regiochemistry was determined by NOESY spectra.  $^1\text{H}$  NMR (300 MHz,  $\text{CDCl}_3$ )  $\delta$ : 0.05 (6 H, s), 0.74 (9 H, s), 2.04 (6 H, s), 2.36 (3 H, s), 6.95 (2 H, s), 7.68 (1 H, d,  $J = 9.5$  Hz), 7.76 (1 H, d,  $J = 9.5$  Hz).  $^{13}\text{C}$  NMR (150 MHz,  $\text{CDCl}_3$ )  $\delta$ : -1.79, 18.9, 20.6, 21.2, 27.3, 112.7, 118.6 (q,  $J = 320$  Hz), 120.7, 126.6, 126.8, 127.3, 128.7, 138.3, 139.7, 153.4, 159.0, 161.3.  $^{19}\text{F}$  NMR (470 MHz,  $\text{CDCl}_3$ )  $\delta$ : -72.8. IR (neat): 2931, 1424  $\text{cm}^{-1}$ . HRMS (MALDI) Calcd for  $\text{C}_{23}\text{H}_{29}\text{F}_3\text{NO}_4\text{SSi}$   $[\text{M}+\text{H}]^+$ : 500.1533, found 500.1530.

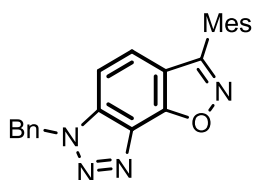

*distal-3d*

**3-Benzyl-6-mesityl-3*H*-isoxazolo[5',4':3,4]benzo[1,2-*d*][1,2,3]triazole (*distal-3d*)** (Table 1, entry 3-2): Following General Procedure B, a mixture of  $\text{CsF}$  (50 mg, 0.33 mmol), benzyl azide **6b** (41  $\mu\text{L}$ , 0.33 mmol) and *distal-10c* (42 mg, 0.11 mmol) was stirred in  $\text{MeCN}$  (1.1 mL, 0.10 M) for 19 h at rt. The crude product (*distal-3d/proximal-3d* = >98:2, determined by 400 MHz  $^1\text{H}$  NMR analysis) was purified by column chromatography on silica gel (hexane/ $\text{EtOAc}$  = 5:1) to provide the titled compound *distal-3d* as a brown oil (30 mg, 74%) and its regiochemistry was determined by NOESY

spectra.  $^1\text{H}$  NMR (500 MHz,  $\text{CDCl}_3$ )  $\delta$ : 2.06 (6 H, s), 2.36 (3 H, s), 5.93 (2 H, s), 7.00 (2 H, s), 7.25 (1 H, d,  $J = 9.0$  Hz), 7.29 (1 H, d,  $J = 9.0$  Hz), 7.31–7.37 (5 H, m).  $^{13}\text{C}$  NMR (125 MHz,  $\text{CDCl}_3$ )  $\delta$ : 20.1, 21.2, 52.8, 106.8, 118.1, 120.9, 123.5, 127.6, 128.5, 128.7, 129.1, 132.7, 134.1, 135.2, 137.6, 139.5, 154.8, 158.3. IR (neat): 2922, 1507  $\text{cm}^{-1}$ . HRMS (MALDI) Calcd for  $\text{C}_{23}\text{H}_{21}\text{N}_4\text{O}$   $[\text{M}+\text{H}]^+$ : 369.1710, found 369.1713.

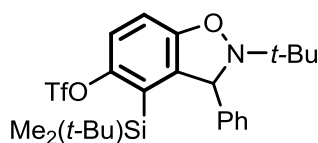

*proximal-10d*

**2-(tert-Butyl)-4-(tert-butyldimethylsilyl)-5-(trifluoromethanesulfonyloxy)-3-phenyl-2,3-dihydrobenzoisoxazole (*proximal-10d*) (Table 1, entry 4-1):** Following General Procedure A, a mixture of  $\text{CsF}$  (48 mg, 0.30 mmol), *N*-tert-butylphenyl nitrene **6d** (53 mg, 0.30 mmol), and 2-(tert-butyldimethylsilyl)-4-(trimethylsilyl)-1,3-bis(trifluoromethanesulfonyloxy)benzene **1b** (56 mg, 0.10 mmol) was stirred in MeCN (1.0 mL) for 0.5 h at rt. The crude product (*distal-10d/proximal-10d* = 22:78, determined by 500 MHz  $^1\text{H}$  NMR analysis) was purified by PTLC (hexane/EtOAc = 10:1) to provide the titled compound *proximal-10d* as a red oil (27 mg, 53%) and its regiochemistry was determined by NOESY spectra.  $^1\text{H}$  NMR (500 MHz,  $\text{CDCl}_3$ )  $\delta$ : 0.15 (3 H, s), 0.38 (3 H, s), 0.68 (9 H, s), 1.18 (9 H, s), 5.68 (1 H, s), 6.90 (2 H, d,  $J = 7.5$  Hz), 6.97 (1 H, d,  $J = 9.0$  Hz), 7.21–7.7.30 (3 H, m), 7.34 (1 H, d,  $J = 9.0$  Hz).  $^{13}\text{C}$  NMR (125 MHz,  $\text{CDCl}_3$ )  $\delta$ : -1.87, -1.80, 18.4, 25.9, 27.1, 61.4, 66.3, 108.5, 118.5 (q,  $J = 321$  Hz), 119.2, 126.2, 127.79, 127.85, 128.9, 135.4, 142.6, 151.0, 156.8.  $^{19}\text{F}$  NMR (470 MHz,  $\text{CDCl}_3$ )  $\delta$ : -73.5. IR (neat): 2931, 1418  $\text{cm}^{-1}$ . HRMS (MALDI) Calcd for  $\text{C}_{24}\text{H}_{33}\text{F}_3\text{NO}_4\text{SSi}$   $[\text{M}+\text{H}]^+$ : 516.1846, found 516.1840.

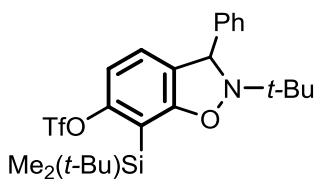

*distal-10d*

**2-(tert-Butyl)-7-(tert-butyldimethylsilyl)-6-(trifluoromethanesulfonyloxy)-3-phenyl-2,3-dihydrobenzoisoxazole (*distal-10d*) (Table 1, entry 4-1)** was obtained from the above-mentioned



reaction mixture as a yellow oil (7.7 mg, 15%) and its regiochemistry was determined by NOESY spectra.  $^1\text{H}$  NMR (500 MHz,  $\text{CDCl}_3$ )  $\delta$ : 0.44 (3 H, s), 0.45 (3 H, s), 0.97 (9 H, s), 1.16 (9 H, s), 5.55 (1 H, s), 6.78 (1 H, d,  $J = 8.5$  Hz), 6.82 (1 H, d,  $J = 8.5$  Hz), 7.27 (1 H, t,  $J = 7.5$  Hz), 7.34 (2 H, t,  $J = 7.5$  Hz), 7.38 (2 H, d,  $J = 7.5$  Hz).  $^{13}\text{C}$  NMR (125 MHz,  $\text{CDCl}_3$ )  $\delta$ : -3.16, -3.04, 18.4, 25.7, 26.8, 60.9, 66.6, 108.2, 111.2, 118.5 (q,  $J = 321$  Hz), 125.7, 127.5, 127.8, 128.7, 128.8, 143.4, 155.8, 162.2.  $^{19}\text{F}$  NMR (470 MHz,  $\text{CDCl}_3$ )  $\delta$ : -73.5. IR (neat): 2931, 1420  $\text{cm}^{-1}$ . HRMS (MALDI) Calcd for  $\text{C}_{23}\text{H}_{29}\text{F}_3\text{NO}_4\text{Si}$   $[\text{M}+\text{H}]^+$ : 516.1846, found 516.1856.

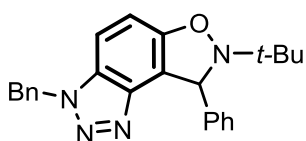

*distal-3e*

**3-Benzyl-7-(tert-butyl)-8-phenyl-7,8-dihydro-3H-isoxazolo[4',5':3,4]benzo[1,2-d][1,2,3]triazole (*distal-3e*)** (Table 1, entry 4-2 and Scheme 3-2):

Following General Procedure B, a mixture of CsF (21 mg, 0.14 mmol), benzyl azide **6b** (17  $\mu\text{L}$ , 0.14 mmol) and *proximal-10d* (24 mg, 46  $\mu\text{mol}$ ) was stirred in MeCN (1.0 mL) for 3 h at rt. The crude product (*distal-3e/proximal-3e* = 86:14, determined by 400 MHz  $^1\text{H}$  NMR analysis) was purified by PTLC (hexane/EtOAc = 5:1) to provide the titled compound *distal-3e* as a colorless oil (11 mg, 61%) and its regiochemistry was determined by NOESY spectra.  $^1\text{H}$  NMR (500 MHz,  $\text{CDCl}_3$ )  $\delta$ : 1.21 (9 H, s), 5.75 (1 H, s), 5.76 (1 H, s), 6.20 (1 H, s), 7.00 (1 H,  $J = 9.0$  Hz, d), 7.18 (1 H,  $J = 9.0$  Hz, d), 7.22–7.38 (8 H, m), 7.69 (2 H,  $J = 7.5$  Hz, d).  $^{13}\text{C}$  NMR (125 MHz,  $\text{CDCl}_3$ )  $\delta$ : 25.2, 52.6, 61.7, 65.8, 109.8, 110.2, 115.2, 127.4, 127.5, 127.7, 128.6, 129.0, 129.2, 129.8, 134.4, 141.9, 142.0, 154.1. IR (neat): 2976, 1445  $\text{cm}^{-1}$ . HRMS (MALDI) Calcd for  $\text{C}_{24}\text{H}_{24}\text{N}_4\text{ONa}$   $[\text{M}+\text{Na}]^+$ : 407.1842, found 407.1843.

Following General Procedure C, a mixture of CsF (60 mg, 0.40 mmol), *N*-tert-butylphenyl nitron **6d** (19 mg, 0.11 mmol), benzyl azide **6b** (37  $\mu\text{L}$ , 0.30 mmol), and 2-(tert-butyl(dimethyl)silyl)-4-(trimethylsilyl)-1,3-bis(trifluoromethanesulfonyloxy)benzene **1b** (56 mg, 0.10 mmol) was stirred in MeCN (1.0 mL) for 20 h at rt. The crude product (*distal-3e/proximal-3e* = 93:7, determined by 400 MHz  $^1\text{H}$  NMR analysis) was purified by PTLC (hexane/EtOAc = 5:1) to provide the titled compound *distal-3e* with *proximal-3e* as a brown oil (15 mg, 38%).

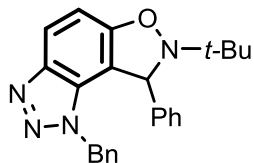

*proximal-3e*

**1-Benzyl-7-(*tert*-butyl)-8-phenyl-7,8-dihydro-1*H*-isoxazolo[4',5':3,4]benzo[1,2-*d*][1,2,3]triazole (*proximal-3e*)** (Table 1, entry 4-2) was obtained from the above-mentioned reaction mixture as a colorless oil (1.8 mg, 10%) and its regiochemistry was determined by NOESY spectra. <sup>1</sup>H NMR (500 MHz, CDCl<sub>3</sub>) δ: 0.91 (9 H, s), 4.79 (1 H, d, *J* = 16.5 Hz), 5.09 (1 H, s), 5.90 (1 H, d, *J* = 16.5 Hz), 6.87–6.91 (2 H, m), 6.98–7.05 (3 H, m), 7.29–7.38 (6 H, m), 7.98 (1 H, d, *J* = 9.0 Hz). <sup>13</sup>C NMR (151 MHz, CDCl<sub>3</sub>) δ: 25.0, 52.2, 61.6, 65.1, 106.2, 106.9, 121.3, 126.2, 127.6, 128.3, 128.4, 129.0, 129.2, 129.3, 136.7, 142.4, 143.8, 158.5. IR (neat): 2926, 1497 cm<sup>-1</sup>. HRMS (MALDI) Calcd for C<sub>24</sub>H<sub>25</sub>N<sub>4</sub>O [M+H]<sup>+</sup>: 385.2023, found 385.2020.

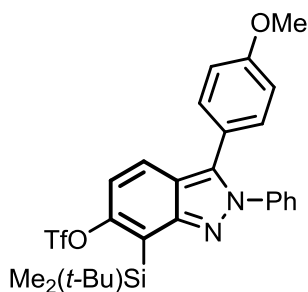

*distal-10e*

**7-(*tert*-Butyldimethylsilyl)-3-(4-methoxyphenyl)-2-phenyl-2*H*-indazol-6-yl**

**trifluoromethanesulfonate (*distal-10e*)** (Table 1, entry 5-1): Following General Procedure A, a mixture of CsF (46 mg, 0.30 mmol), 3-phenyl-4-(4-methoxyphenyl)sydnone **6e**<sup>10</sup> (58 mg, 0.30 mmol), and 2-(*tert*-butyldimethylsilyl)-4-(trimethylsilyl)-1,3-bis(trifluoromethanesulfonyloxy)benzene **1b** (56 mg, 0.10 mmol) was stirred in MeCN (1.0 mL, 0.10 M) for 0.5 h at rt. The crude product (*distal-10e/proximal-10e* = 85:15, determined by 300 MHz <sup>1</sup>H NMR analysis) was purified by PTLC (hexane/EtOAc = 10:1) to provide the titled compound *distal-10e* as a yellow solid (26 mg, 43%) and its regiochemistry was determined by NOESY spectra. Mp: 119–121 °C. <sup>1</sup>H NMR (300 MHz, CDCl<sub>3</sub>) δ: 0.61 (6 H, s), 1.02 (9 H, s), 3.86 (3 H, s), 6.94 (2 H, d, *J* = 8.5 Hz), 7.09 (1 H, d, *J* = 9.0 Hz), 7.25 (2 H, d, *J* = 8.5 Hz), 7.35–7.44 (5 H, m), 7.70 (1 H, d, *J* = 9.0 Hz). <sup>13</sup>C NMR (100 MHz, CDCl<sub>3</sub>) δ: -2.30, 18.5, 27.3, 55.3, 114.4, 115.4, 118.5 (q, *J* =

320 Hz), 118.6, 119.6, 121.7, 124.1, 125.4, 128.0, 128.8, 130.9, 134.8, 140.2, 152.3, 154.6, 159.8.  $^{19}\text{F}$  NMR (376 MHz,  $\text{CDCl}_3$ )  $\delta$ : -73.7. IR (neat): 2925, 2854  $\text{cm}^{-1}$ . HRMS (MALDI) Calcd for  $\text{C}_{27}\text{H}_{30}\text{F}_3\text{N}_2\text{O}_4\text{SSi}$   $[\text{M}+\text{H}]^+$ : 563.1642, found 563.1645.

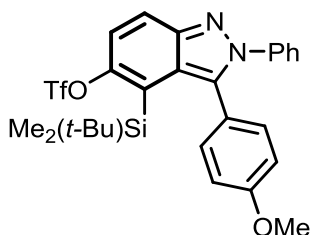

*proximal-10e*

**4-(*tert*-Butyldimethylsilyl)-3-(4-methoxyphenyl)-2-phenyl-2H-indazol-5-yl**

**trifluoromethanesulfonate (*proximal-10e*) (Table 1, entry 5-1)** was obtained from the above-mentioned reaction mixture as a colorless oil (4.6 mg, 6%) and its regiochemistry was determined by NOESY spectra.  $^1\text{H}$  NMR (400 MHz,  $\text{CDCl}_3$ )  $\delta$ : -0.08 (6 H, s), 0.80 (9 H, s), 3.81 (3 H, s), 6.82 (2 H, d,  $J = 8.5$  Hz), 7.12–7.17 (4 H, m), 7.27–7.30 (3 H, m), 7.42 (1 H, d,  $J = 9.5$  Hz), 7.89 (1 H, d,  $J = 9.5$  Hz).  $^{13}\text{C}$  NMR (125 MHz,  $\text{CDCl}_3$ )  $\delta$ : -0.24, 19.2, 27.8, 55.3, 113.6, 118.7 (q,  $J = 320$  Hz), 119.0, 121.9, 122.5, 123.8, 124.3, 126.6, 128.5, 128.6, 133.8, 139.6, 140.4, 146.3, 153.8, 160.3.  $^{19}\text{F}$  NMR (470 MHz,  $\text{CDCl}_3$ )  $\delta$ : -73.7. IR (neat): 2930, 1415  $\text{cm}^{-1}$ . HRMS (MALDI) Calcd for  $\text{C}_{27}\text{H}_{30}\text{F}_3\text{N}_2\text{O}_4\text{SSi}$   $[\text{M}+\text{H}]^+$ : 563.1642, found 563.1640.

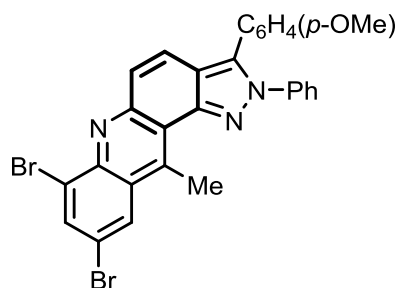

*proximal-3f*

**7,9-Dibromo-3-(4-methoxyphenyl)-11-methyl-2-phenyl-2H-pyrazolo[3,4-*a*]acridine (*proximal-3f*) (Table 1, entry 5-2):** Following General Procedure B, a mixture of CsF (31 mg, 0.21 mmol), 2-acetyl-4,6-dibromoaniline **6g**,<sup>11</sup> (59 mg, 0.21 mmol) and *distal-10e* (32 mg, 70  $\mu\text{mol}$ ) was stirred in MeCN (1.0 mL) for 10 h at rt. The crude product (*distal-3f/proximal-3f* = 2:>98, determined by 400 MHz  $^1\text{H}$  NMR analysis) was purified by column chromatography on silica gel (hexane/EtOAc = 3:1)

to provide the titled compound *proximal-3f* as a yellow solid (18 mg, 58%) and its regiochemistry was determined by TOCSY and ROESY spectra. Mp: 255–258 °C. <sup>1</sup>H NMR (500 MHz, CDCl<sub>3</sub>) δ: 3.60 (3 H, s), 3.87 (3 H, s), 6.98 (2 H, d, *J* = 8.0 Hz), 7.33 (2 H, d, *J* = 8.0 Hz), 7.37–7.47 (3 H, m), 7.51 (2 H, d, *J* = 8.0 Hz), 7.76 (1 H, d, *J* = 9.5 Hz), 7.80 (1 H, d, *J* = 9.5 Hz), 8.23 (1 H, d, *J* = 1.5 Hz), 8.52 (1 H, d, *J* = 1.5 Hz). <sup>13</sup>C NMR (125 MHz, CDCl<sub>3</sub>) δ: 17.5, 55.4, 114.5, 118.6, 119.0, 120.1, 121.4, 124.7, 125.5, 126.5, 126.9, 127.0, 127.9, 128.4, 129.0, 131.1, 135.4, 136.6, 140.1, 142.7, 142.8, 146.7, 151.9, 160.0. IR (neat): 2910, 1588 cm<sup>-1</sup>. HRMS (MALDI) Calcd for C<sub>28</sub>H<sub>20</sub>Br<sub>2</sub>N<sub>3</sub> [M+H]<sup>+</sup>: 571.9968, found 571.9960.

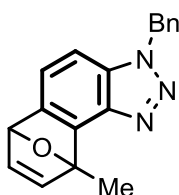

*proximal-3g*

**3-Benzyl-9-methyl-6,9-dihydro-3H-6,9-epoxynaphtho[1,2-*d*][1,2,3]triazole** (*proximal-3g*)

**(Scheme 3-1):** Following General Procedure C, a mixture of CsF (60 mg, 0.40 mmol), benzyl azide **6b** (14 μL, 0.11 mmol), 2-methylfuran **6h** (27 μL, 0.30 mmol), 18-crown-6 (0.10 g, 0.40 mmol), and 2-(*tert*-butyldimethylsilyl)-4-(trimethylsilyl)-1,3-bis(trifluoromethanesulfonyloxy)benzene **1b** (56 mg, 0.10 mmol) was stirred in MeCN (1.0 mL) for 16 h at 0 °C. The crude product (*distal-3g/proximal-3g* = 37:63, determined by 400 MHz <sup>1</sup>H NMR analysis) was purified by flash column chromatography on silica gel (hexane/EtOAc = 3:1, 16 mg, 56% as a mixture of *distal-3g* and *proximal-3g*) and PTLC (hexane/EtOAc = 2:1) to provide the titled compound *proximal-3g* as a yellow oil (9.3 mg, 32%) and its regiochemistry was determined by NOESY spectra. <sup>1</sup>H NMR (500 MHz, CDCl<sub>3</sub>) δ: 2.38 (3 H, s), 5.79 (1 H, d, *J* = 2.0 Hz), 5.81 (s, 2 H), 6.98 (1 H, d, *J* = 8.0 Hz), 7.01 (1 H, d, *J* = 5.0 Hz), 7.17 (1 H, dd, *J* = 2.0, 5.0 Hz), 7.23–7.25 (2 H, m), 7.28–7.34 (3 H, m), 7.35 (1 H, d, *J* = 8.0 Hz). <sup>13</sup>C NMR (125 MHz, CDCl<sub>3</sub>) δ: 16.7, 52.4, 82.5, 90.6, 105.3, 119.6, 127.5, 128.4, 128.9, 132.1, 134.7, 141.3, 144.2, 146.28, 146.32, 149.0. IR (neat): 2932, 1456 cm<sup>-1</sup>. HRMS (APCI) Calcd for C<sub>18</sub>H<sub>16</sub>N<sub>3</sub>O [M+H]<sup>+</sup>: 290.1293, found 290.1264.

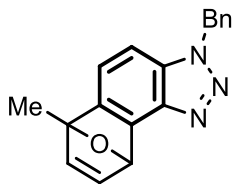

*distal-3g*

**3-Benzyl-6-methyl-6,9-dihydro-3H-6,9-epoxynaphtho[1,2-d][1,2,3]triazole (*distal-3g*) (Scheme 3-1)** was obtained from the above-mentioned reaction mixture as a colorless oil (5.6 mg, 19%) and its regiochemistry was determined by NOESY spectra.  $^1\text{H}$  NMR (500 MHz,  $\text{CDCl}_3$ )  $\delta$ : 2.00 (3 H, s), 5.81 (2 H, s), 6.32 (1 H, d,  $J = 2.0$  Hz), 6.91 (1 H, d,  $J = 5.0$  Hz), 7.00 (1 H, d,  $J = 8.0$  Hz), 7.20 (1 H, dd,  $J = 2.0, 5.0$  Hz), 7.22–7.25 (2 H, m), 7.28–7.32 (4 H, m).  $^{13}\text{C}$  NMR (125 MHz,  $\text{CDCl}_3$ )  $\delta$ : 15.4, 52.4, 80.5, 90.2, 105.4, 118.6, 127.5, 128.4, 129.0, 131.7, 134.6, 141.1, 143.7, 144.6, 147.5, 149.3. IR (neat): 2929, 1456  $\text{cm}^{-1}$ . HRMS (APCI) Calcd for  $\text{C}_{18}\text{H}_{16}\text{N}_3\text{O}$   $[\text{M}+\text{H}]^+$ : 290.1293, found 290.1272.

### Synthesis of risperidone **14** from 1,3-benzdiyne equivalent **1b** (Scheme 4):

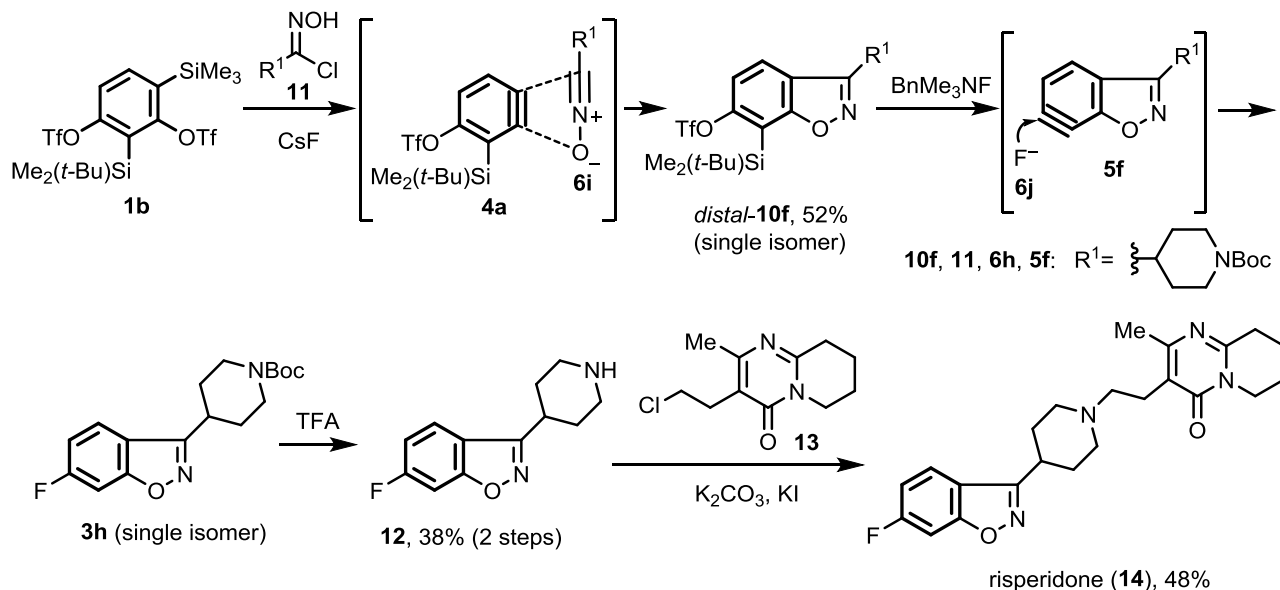

### Scheme S1 Application of 1,3-benzdiyne equivalent **1b** to the synthesis of risperidone **14**.

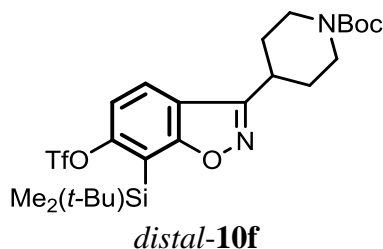

**tert-Butyl 4-(7-(tert-butyldimethylsilyl)-6-(trifluoromethanesulfonyloxy)benzo[d]isoxazol-3-yl)piperidine-1-carboxylate (*distal-10f*) (Scheme 4):** Following General Procedure A, a mixture of CsF (0.12 g 0.54 mmol), 1-(*tert*-butoxycarbonyl)-4-(chloro(hydroxyimino)methyl)piperidine **11** (0.14 g, 54  $\mu\text{mol}$ ), and 2-(*tert*-butyldimethylsilyl)-4-(trimethylsilyl)-1,3-bis(trifluoromethanesulfonyloxy)benzene **1b** (50 mg, 89  $\mu\text{mol}$ ) was stirred in MeCN (9.0 mL) for 0.5 h at rt. The crude product (*distal-10f/proximal-10f* = >98:2, determined by 400 MHz  $^1\text{H}$  NMR analysis) was purified by column chromatography on silica gel (hexane/EtOAc = 5:1) to provide the titled compound *distal-10f* (26 mg, 52%) as a brown oil and its regiochemistry was determined by NOESY spectra.  $^1\text{H}$  NMR (300 MHz,  $\text{CDCl}_3$ )  $\delta$ : 0.56 (6 H, s), 0.94 (9 H, s), 1.49 (9 H, s), 1.85–2.09 (4 H, m), 2.93–3.01 (2 H, m), 3.19–3.28 (m, 1 H), 4.22–4.26 (m, 2 H), 7.36 (1 H, d,  $J = 9.0$  Hz), 7.75 (1 H, d,  $J = 9.0$  Hz).  $^{13}\text{C}$  NMR (125 MHz,  $\text{CDCl}_3$ )  $\delta$ : -3.5, 18.3, 26.6, 28.4, 30.1, 34.4, 43.6 (br),

79.8, 113.2, 115.4, 118.3, 118.4 (q,  $J = 320$  Hz), 123.5, 154.7, 156.1, 160.4, 168.5.  $^{19}\text{F}$  NMR (470 MHz,  $\text{CDCl}_3$ )  $\delta$ : -73.5. IR (neat): 2930, 1695  $\text{cm}^{-1}$ . HRMS (MALDI) Calcd for  $\text{C}_{24}\text{H}_{35}\text{F}_3\text{N}_2\text{O}_6\text{NaSSi}$   $[\text{M}+\text{Na}]^+$ : 587.1829, found 587.1841.

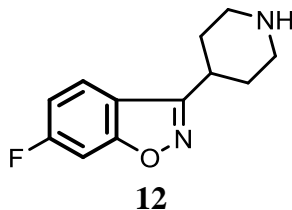

**4-(7-Fluorobenzo[d]isoxazol-3-yl)piperidine (12) (Scheme 4):** Following General Procedure B, a mixture of  $\text{BnMe}_3\text{NF}$  (0.17 g, 1.0 mmol), and *distal-10f* (0.27 g, 0.48 mmol) was stirred in THF (5.0 mL) for 5 min at 0 °C. The crude product (*distal-3h/proximal-3h* = >98:2, determined by 400 MHz  $^1\text{H}$  NMR analysis) was purified by column chromatography on silica gel (hexane/EtOAc = 5:1) to provide *distal-3h* (56 mg) contaminated with a small amount of impurity. A mixture of the aforementioned *distal-3h* (30 mg) and TFA (0.30 mL) was stirred in  $\text{CH}_2\text{Cl}_2$  (3.0 mL) for 10 h at rt. The crude product was purified by PTLC ( $\text{CH}_2\text{Cl}_2/\text{MeOH} = 5:1$  with 1%  $\text{Et}_3\text{N}$ ) to provide pure **12** (19 mg, 34% in two-step) as a colorless oil.  $^1\text{H}$  NMR (300 MHz,  $\text{CDCl}_3$ )  $\delta$ : 1.88–2.07 (4 H, m), 2.82 (2 H, td,  $J = 11.5$  Hz, 2.5 Hz), 3.15–3.29 (3 H, m), 7.05 (1 H, ddd,  $J = 9.0$  Hz, 9.0 Hz, 2.0 Hz), 7.22–7.26 (1 H, m), 7.70 (1H, dd,  $J = 9.0$  Hz, 5.0 Hz).  $^{13}\text{C}$  NMR (125 MHz,  $\text{CD}_3\text{OD}$ )  $\delta$ : 31.1, 34.8, 46.2, 98.0 ( $J = 26.5$  Hz), 113.6 ( $J = 25.0$  Hz), 118.4, 124.3 ( $J = 11.0$  Hz), 162.4, 165.2, ( $J = 13.0$  Hz), 165.8 ( $J = 249.5$  Hz).  $^{19}\text{F}$  NMR (376 MHz,  $\text{CDCl}_3$ )  $\delta$ : -75.5. IR (neat): 3418, 2926, 1612, 1418  $\text{cm}^{-1}$ . HRMS (MALDI) Calcd for  $\text{C}_{12}\text{H}_{14}\text{FN}_2\text{O}$   $[\text{M}+\text{H}]^+$ : 221.1085, found 221.1088.

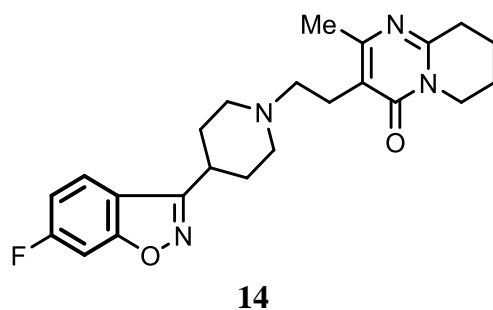

**3-(2-(4-(6-Fluorobenzo[d]isoxazol-3-yl)piperidin-1-yl)ethyl)-2-methyl-6,7,8,9-tetrahydro-4H-pyrido[1,2-a]pyrimidin-4-one (14) (Scheme 4):** A solution of **12** (10 mg, 45  $\mu\text{mol}$ ) and alkyl halide **13** (10 mg, 45  $\mu\text{mol}$ ) with  $\text{K}_2\text{CO}_3$  (10 mg, 72  $\mu\text{mol}$ ) and KI (10 mg, 60  $\mu\text{mol}$ ) was stirred in DMF (1.0 mL) for 15 h at rt. The crude mixture was filtered through Celite pad and concentrated under

reduced pressure. The residue was purified by PTLC ( $\text{CH}_2\text{Cl}_2/\text{MeOH} = 5:1$  with 1%  $\text{Et}_3\text{N}$ ) to provide the titled compound **14** (8.8 mg, 48%) as a white solid. Mp: 169–172 °C.  $^1\text{H}$  NMR (500 MHz,  $\text{CDCl}_3$ )  $\delta$ : 1.85–1.91 (2 H, m), 1.93–1.99 (2 H, m), 2.04–2.15 (4 H, m), 2.55–2.34 (5 H, m), 2.51–2.56 (2 H, m), 2.74–2.79 (2 H, m), 2.87 (2 H, t,  $J = 7.0$  Hz), 3.04–3.12 (1 H, m), 3.15–3.21 (2 H, m), 3.92 (2 H, d,  $J = 6.5$  Hz), 7.05 (1 H, ddd,  $J = 9.0$  Hz, 9.0 Hz, 2.5 Hz), 7.24, (1 H, dd,  $J = 8.0$  Hz, 2.5 Hz), 7.71 (1 H, dd,  $J = 9.0$  Hz, 5.0 Hz).  $^{13}\text{C}$  NMR (125 MHz,  $\text{CDCl}_3$ )  $\delta$ : 19.2, 21.3, 22.0, 23.7, 30.5, 31.5, 34.6, 42.7, 53.4, 56.7, 97.4 ( $J = 26.5$  Hz), 112.3 ( $J = 25.0$  Hz), 117.3, 119.3, 122.7 ( $J = 11.0$  Hz), 155.9, 158.4, 161.1, 162.6, 163.8 ( $J = 13.0$  Hz), 164.1 ( $J = 249.5$  Hz).



## Reaction of 1,4-benzdiyne equivalent **15** (Table 2):

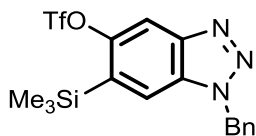

*proximal-17a*

### **1-Benzyl-5-(trifluoromethanesulfonyloxy)-6-(trimethylsilyl)benzotriazole** (*proximal-17a*)

(Table 2, entry 1-1): Following General Procedure A, a mixture of CsF (0.46 g, 3.0 mmol), benzyl azide **6b** (0.38 mL, 3.0 mmol), and 1,4-bis(trifluoromethanesulfonyloxy)-2,5-bis(trimethylsilyl)benzene **15** (0.52 g, 1.0 mmol) was stirred in MeCN (10 mL) for 40 min at rt. The crude product (*distal-17a/proximal-17a* = 15:85, determined by determined by 500 MHz <sup>1</sup>H NMR analysis) was purified by column chromatography on silica gel (hexane/EtOAc = 8:1) to provide the titled compound *proximal-17a* as a pale yellow oil (0.23 g, 52%) and its regiochemistry was determined by NOESY spectra. <sup>1</sup>H NMR (500 MHz, CDCl<sub>3</sub>) δ: 0.33 (9 H, s), 5.86 (2 H, s), 7.32 (2H, d, *J* = 7.0 Hz), 7.34–7.40 (4 H, m), 8.04 (1 H, s). <sup>13</sup>C NMR (125 MHz, CDCl<sub>3</sub>) δ: -0.96, 52.9, 110.4, 117.1, 118.4 (q, *J* = 319 Hz), 127.9, 128.9, 129.2, 131.6, 133.7, 133.9, 147.0, 151.1. <sup>19</sup>F NMR (376 MHz, CDCl<sub>3</sub>) δ: -73.5. IR (neat): 2953, 1424 cm<sup>-1</sup>. HRMS (MALDI) Calcd for C<sub>17</sub>H<sub>19</sub>F<sub>3</sub>N<sub>3</sub>O<sub>3</sub>SSi [M+H]<sup>+</sup>: 430.0863, found 430.0871.

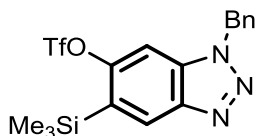

*distal-17a*

### **1-Benzyl-6-(trifluoromethanesulfonyloxy)-5-(trimethylsilyl)benzotriazole** (*distal-17a*) (Table 2,

entry 1-1) was obtained from the above-mentioned reaction mixture as a brown oil (40 mg, 9%). <sup>1</sup>H NMR (300 MHz, CDCl<sub>3</sub>) δ: 0.39 (9 H, s), 5.84 (2 H, s), 7.29–7.40 (6 H, m), 8.23 (1 H, s). <sup>13</sup>C NMR (100 MHz, CDCl<sub>3</sub>) δ: -0.87, 52.9, 100.7, 118.4 (q, *J* = 320 Hz), 127.9, 128.2, 128.9, 129.1, 129.2, 133.4, 133.6, 145.0, 153.6. <sup>19</sup>F NMR (376 MHz, CDCl<sub>3</sub>) δ: -73.6. IR (neat): 2950, 1421 cm<sup>-1</sup>. HRMS (MALDI) Calcd for C<sub>17</sub>H<sub>19</sub>F<sub>3</sub>N<sub>3</sub>O<sub>3</sub>SSi [M+H]<sup>+</sup>: 430.0863, found 430.0867.

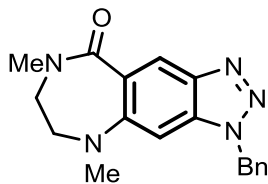

*proximal-19a*

**3-Benzyl-5,8-dimethyl-5,6,7,8-tetrahydro-[1,2,3]triazolo[4',5':4,5]benzo[1,2-*e*][1,4]diazepin-9(3*H*)-one (*proximal-18a*) (Table 2, entry 1-2):**

Following General Procedure B, a mixture of CsF (0.10 g, 0.69 mmol), 1,3-dimethyl-2-imidazolidinone **6l** (75  $\mu$ L, 0.69 mmol), and a mixture of *distal*- and *proximal-17a* (0.10 g, 0.23 mmol, obtained from entry 1-1 of Table 2) was stirred in MeCN (2.3 mL) for 3 h at rt. The crude product (*distal-19a/proximal-19a* = 25:75, determined by 400 MHz  $^1\text{H}$  NMR analysis) was purified by PTLC ( $\text{CH}_2\text{Cl}_2/\text{EtOAc}$  = 5:1) to provide the titled compound *proximal-19a* as a brown oil (39 mg, 53%) and its regiochemistry was determined by NOESY spectra.  $^1\text{H}$  NMR (500 MHz,  $\text{CDCl}_3$ )  $\delta$ : 2.76 (3 H, s), 3.21–3.25 (5 H, m), 3.42 (2 H, t,  $J$  = 5.5 Hz), 5.78 (2 H, s), 6.55 (1 H, s), 7.23–7.37 (5 H, m), 8.31 (1 H, s).  $^{13}\text{C}$  NMR (125 MHz,  $\text{CDCl}_3$ )  $\delta$ : 34.5, 40.8, 47.8, 52.0, 57.6, 96.5, 122.3, 127.5, 128.4, 129.0, 129.7, 134.7, 135.0, 141.9, 147.3, 169.5. IR (neat): 2924, 2853, 1642, 1455  $\text{cm}^{-1}$ . HRMS (MALDI) Calcd for  $\text{C}_{18}\text{H}_{19}\text{N}_5\text{ONa}$  [ $\text{M}+\text{Na}$ ] $^+$ : 344.1482, found 344.1476.

Following General Procedure C, a mixture of CsF (60 mg, 0.40 mmol), benzyl azide **6b** (14  $\mu$ L, 0.11 mmol), 1,3-dimethyl-2-imidazolidinone **6l** (33  $\mu$ L, 0.30 mmol), and a mixture of 1,4-bis(trifluoromethanesulfonyloxy)-2,5-bis(trimethylsilyl)benzene **15** (52 mg, 0.10 mmol) was stirred in MeCN (1.0 mL) for 30 min and 14 h at rt. The crude product (*distal-19a/proximal-19a* = 74:26, determined by 400 MHz  $^1\text{H}$  NMR analysis) was purified by PTLC ( $\text{CH}_2\text{Cl}_2/\text{EtOAc}$  = 5:1) to provide the titled compound *proximal-19a* with *distal-19a* as a brown oil (12 mg, 37%).

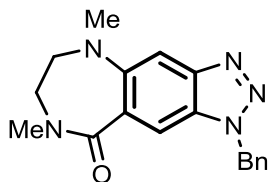

*distal-19a*

**1-Benzyl-5,8-dimethyl-5,6,7,8-tetrahydro-[1,2,3]triazolo[4',5':4,5]benzo[1,2-*e*][1,4]diazepin-9(1*H*)-one (*distal-19a*) (Table 2, entry 1-2)** was obtained from the above-mentioned reaction

mixture (Procedure B) as a brown oil (13 mg, 18%) and its regiochemistry was determined by NOESY spectra.  $^1\text{H}$  NMR (500 MHz,  $\text{CDCl}_3$ )  $\delta$ : 2.89 (3 H, s), 3.20–3.23 (5 H, m), 3.37 (2 H, t,  $J$  = 5.5 Hz), 5.79 (2 H, s), 7.28–7.34 (5 H, m), 7.46 (1 H, s), 7.71 (1 H, s).  $^{13}\text{C}$  NMR (125 MHz,  $\text{CDCl}_3$ )  $\delta$ : 34.5, 40.9, 48.1, 52.4, 57.7, 107.1, 111.4, 127.7, 128.5, 128.8, 129.0, 133.3, 134.6, 144.6, 148.3, 169.5. IR (neat): 2924, 2852, 1645, 1498  $\text{cm}^{-1}$ . HRMS (MALDI) Calcd for  $\text{C}_{18}\text{H}_{19}\text{N}_5\text{ONa}$   $[\text{M}+\text{Na}]^+$ : 344.1482, found 344.1480.

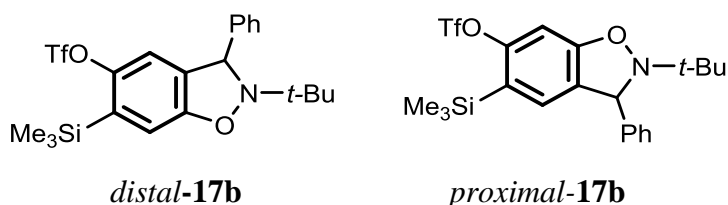

**2-(*tert*-Butyl)-3-phenyl-6-(trimethylsilyl)-2,3-dihydrobenzo[*d*]isoxazol-5-yl trifluoromethanesulfonate (*distal-17b*) and 2-(*tert*-butyl)-3-phenyl-5-(trimethylsilyl)-2,3-dihydrobenzo[*d*]isoxazol-6-yl trifluoromethanesulfonate (*proximal-17b*) (Table 2, entry 2-1):**

Following General Procedure A, a mixture of CsF (0.46 g, 3.0 mmol), *N-tert*-butylphenyl nitrone **6d** (0.53 g, 3.0 mmol), and 1,4-bis(trifluoromethanesulfonyloxy)-3,5-bis(trimethylsilyl)benzene **15** (0.52 g, 1.0 mmol) was stirred in MeCN (10 mL) for 40 min at rt. The crude product (*distal-17b/proximal-17b* = 73:27, determined by 500 MHz  $^1\text{H}$  NMR analysis) was purified by column chromatography on silica gel (hexane/EtOAc = 8:1) to provide a mixture of titled compounds *distal-17b* and *proximal-17b* as a pale yellow oil (0.34 g, 71%) and regiochemistry was determined by NOESY spectra.  $^1\text{H}$  NMR (300 MHz,  $\text{CDCl}_3$ )  $\delta$ : 0.25 (9/4 H, s), 0.33 (27/4 H, s), 1.17 (9/4 H, s), 1.18 (27/4 H, s), 5.57 (1/4 H, s), 5.60 (3/4 H, s), 6.80 (3/4 H, brs), 6.81 (1/4 H, s), 6.88 (3/4 H, s), 6.92 (1/4 H, brs), 7.27–7.42 (20/4 H, m).  $^{13}\text{C}$  NMR (125 MHz,  $\text{CDCl}_3$ )  $\delta$ : -0.83, -0.77, 25.4, 25.4, 61.2, 61.4, 66.5, 66.8, 99.2, 112.8, 115.6, 115.8, 118.3 (q,  $J$  = 319 Hz), 123.1, 127.2, 127.3, 127.7, 127.8, 128.8, 129.5, 130.1, 132.9, 133.6, 142.6, 142.9, 148.3, 154.9, 155.2, 158.3.  $^{19}\text{F}$  NMR (376 MHz,  $\text{CDCl}_3$ )  $\delta$ : -73.8 (*proximal*), -73.9 (*distal*). IR (neat): 2976, 1418  $\text{cm}^{-1}$ . HRMS (MALDI) Calcd for  $\text{C}_{21}\text{H}_{27}\text{F}_3\text{NO}_4\text{SSi}$   $[\text{M}+\text{H}]^+$ : 474.1377, found 474.1377.

**[1.4 gram scale reaction]** Following General Procedure A, a mixture of CsF (0.91 g, 6.0 mmol), *N-tert*-butylphenyl nitrone **6d** (1.1 g, 6.0 mmol), and 1,4-bis(trifluoromethanesulfonyloxy)-3,5-bis(trimethylsilyl)benzene **15** (1.4 g, 2.0 mmol) was stirred in MeCN (20 mL) for 40 min at rt. The crude product (*distal-17b/proximal-17b* = 74:26, determined by 400 MHz  $^1\text{H}$  NMR analysis) was

purified by column chromatography on silica gel (hexane/EtOAc = 8:1) to provide a mixture of titled compounds *distal-17b* and *proximal-17b* as a pale yellow oil (0.69 g, 73%). <sup>1</sup>H NMR spectra data were identical with those of a mixture of titled compounds *distal-17b* and *proximal-17b* obtained by the reactin in a small scale shown above.

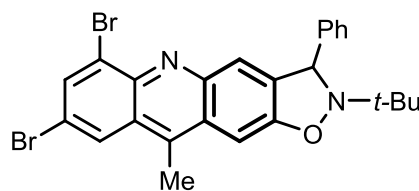

*distal-19b*

**6,8-Dibromo-2-(tert-butyl)-10-methyl-3-phenyl-2,3-dihydroisoxazolo[5,4-b]acridine (*distal-19b*) (Table 2, entry 2-2):** Following General Procedure B, a mixture of CsF (49 mg, 0.30 mmol), 2-amino-3,5-dibromoacetophenone **6g** (0.10 g, 0.30 mmol), and a mixture of *distal-* and *proximal-17b* (47 mg, 0.10 mmol, obtained from entry 2-1 of Table 2) was stirred in MeCN (1.0 mL) for 14 h at rt. The crude product (*distal-19b/proximal-19b* = 70:30, determined by 400 MHz <sup>1</sup>H NMR analysis) was purified by PTLC (hexane/EtOAc = 5:1) to provide the titled compound *distal-19b* as a yellow solid (14 mg, 40%) and its regiochemistry was determined by NOESY spectra. Mp: 207–209 °C. <sup>1</sup>H NMR (500 MHz, CDCl<sub>3</sub>) δ: 1.25 (9 H, s), 2.94 (3 H, s), 5.75 (1 H, s), 7.28 (1 H, t, *J* = 7.0 Hz), 7.35 (2 H, dd, *J* = 7.0 Hz, 7.0 Hz), 7.36 (1 H, s), 7.49 (2 H, d, *J* = 7.0 Hz), 7.85 (1 H, s), 8.09 (1 H, d, *J* = 1.5 Hz), 8.29 (1 H, d, *J* = 1.5 Hz). <sup>13</sup>C NMR (125 MHz, CDCl<sub>3</sub>) δ: 14.3, 25.6, 61.5, 66.4, 95.3, 118.5, 125.6, 126.2, 126.6, 126.8, 127.2, 127.4, 127.9, 128.9, 134.7, 139.4, 141.5, 141.7, 142.2, 146.3 156.0. IR (neat): 2980, 1450 cm<sup>-1</sup>. HRMS (MALDI) Calcd for C<sub>25</sub>H<sub>23</sub>N<sub>2</sub>OBr<sub>2</sub> [M+H]<sup>+</sup>: 525.0172, found 525.0176.

**[0.7 g scale reaction]** Following General Procedure B, a mixture of CsF (0.67 g, 4.4 mmol), 2-amino-3,5-dibromoacetophenone **6g** (1.3 g, 4.4 mmol), and a mixture of *distal-* and *proximal-17b* (0.69 g, 1.5 mmol, obtained from entry 2-1 of Table 2 [1.4 g scale reaction]) was stirred in MeCN (15 mL) for 14 h at rt. The crude product (*distal-19b/proximal-19b* = 67:33, determined by 400 MHz <sup>1</sup>H NMR analysis) was purified by column chromatography on silica gel (hexane/CH<sub>2</sub>Cl<sub>2</sub> = 2:1) to provide the mixture of titled compound *distal-19b* and **6g**. The mixture was purified by trituration using EtOAc to provide the pure *distal-19b* as a yellow solid (0.30 g, 39%). Melting point

and  $^1\text{H}$  NMR spectra data were identical with those of *distal-19b* obtained by the reaction in a small scale shown above.

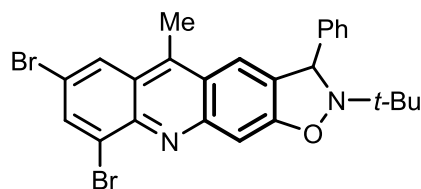

*proximal-19b*

**7,9-Dibromo-2-(*tert*-butyl)-5-methyl-3-phenyl-2,3-dihydroisoxazolo[4,5-*b*]acridine (*proximal-19b*)** (Table 2, entry 2-2) was obtained from the above-mentioned reaction mixture as a pale yellow oil (5.7 mg, 17%) and its regiochemistry was determined by NOESY spectra.  $^1\text{H}$  NMR (500 MHz,  $\text{CDCl}_3$ )  $\delta$ : 1.23 (9 H, s), 2.90 (3 H, s), 5.74 (1 H, s), 7.32 (1 H, t,  $J = 7.5$  Hz), 7.39 (2 H, t,  $J = 7.5$  Hz), 7.48 (2 H, d,  $J = 7.5$  Hz), 7.52 (1 H, s), 7.71 (1 H, s), 8.15 (1 H, d,  $J = 2.0$  Hz), 8.27 (1 H, d,  $J = 2.0$  Hz).  $^{13}\text{C}$  NMR (125 MHz,  $\text{CDCl}_3$ )  $\delta$ : 14.3, 25.6, 61.7, 66.3, 102.0, 117.0, 118.9, 122.7, 125.6, 126.2, 126.6, 127.4, 127.9, 129.0, 135.7, 137.7, 141.7, 142.8, 143.8, 150.7, 159.5. IR (neat): 2971, 1640  $\text{cm}^{-1}$ . HRMS (MALDI) Calcd for  $\text{C}_{25}\text{H}_{23}\text{N}_2\text{OBr}_2$   $[\text{M}+\text{H}]^+$ : 525.0172, found 525.0153.

**[0.7 g scale reaction]** The titled compound *proximal-19b* was obtained from the above-mentioned reaction mixture [0.7 g scale reaction] as a yellow solid (99 mg, 13%). Mp: 224–225  $^\circ\text{C}$ .  $^1\text{H}$  NMR spectra data were identical with those of *proximal-19b* obtained by the reaction in a small scale shown above.

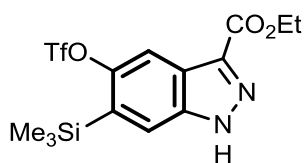

*distal-17c*

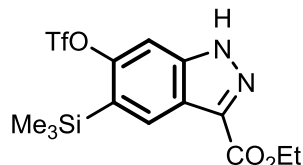

*proximal-17c*

**Ethyl 5-(trifluoromethanesulfonyloxy)-6-(trimethylsilyl)-1H-indazole-3-carboxylate (*distal-17c*) and ethyl 6-(trifluoromethanesulfonyloxy)-5-(trimethylsilyl)-1H-indazole-3-carboxylate (*proximal-17c*)** (Table 2, entry 3-1): Following General Procedure A, a mixture of CsF (0.46 g, 3.0 mmol), ethyl diazoacetate **6k** (0.69 mL, 3.0 mmol), and 1,4-bis(trifluoromethanesulfonyloxy)-3,5-bis(trimethylsilyl)benzene **15** (0.53 g, 1.0 mmol) was stirred in MeCN (10 mL) for 15 min at rt. The crude product (*distal-17c/proximal-17c* = 24:76, determined by 400 MHz  $^1\text{H}$  NMR analysis) was

purified by column chromatography on silica gel (hexane/EtOAc = 4:1) to provide the mixture of titled compounds *distal*- and *proximal*-**17c** as a colorless solid (0.27 g, 66%) and its regiochemistry was determined by HMQC and HMBC spectra. Mp: 223–226 °C. <sup>1</sup>H NMR (500 MHz, CDCl<sub>3</sub>) δ: 0.46 (9/4 H, s), 0.49 (27/4 H, s), 1.54–1.59 (3 H, m), 4.57–4.64 (2 H, m), 8.14 (1/4 H, s), 8.35 (3/4 H, s), 8.37 (3/4 H, s), 8.43 (1/4 H, s). <sup>13</sup>C NMR (125 MHz, CDCl<sub>3</sub>) δ: –0.8, 14.1, 14.3, 61.5, 61.6, 103.6, 111.6, 118.6 (q, *J* = 320 Hz), 120.7, 121.0, 122.7, 127.5, 129.8, 132.8, 136.3, 136.7, 140.3, 142.4, 151.2, 154.3, 163.0, 163.1. <sup>19</sup>F NMR (376 MHz, CDCl<sub>3</sub>) δ: –73.5 (*distal*), –73.6 (*proximal*). IR (neat): 3257, 1729, 1418 cm<sup>–1</sup>. HRMS (MALDI) Calcd for C<sub>14</sub>H<sub>17</sub>F<sub>3</sub>N<sub>2</sub>O<sub>5</sub>NaSSi [M+H]<sup>+</sup>: 433.0472, found 433.0477.

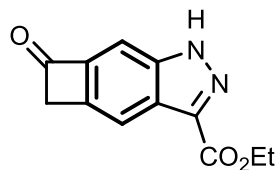

*distal*-**19c'**

**Ethyl 6-oxo-5,6-dihydro-1*H*-cyclobuta[*f*]indazole-3-carboxylate (*distal*-**19c'**) (Table 2, entry 3-2):** A stirrer bar was placed into the flask with obtained above obtained a mixture of *distal*- and *proximal*-**17c** (20 mg, 50 μmol, obtained from entry 3-1 of Table 2). The flask was equipped with a three-way stopcock and evacuated and back-filled with Ar. MeCN (0.50 mL) and 1,1-dimethoxyethylene **6m** (13 mg, 0.15 mmol) were added into the flask via a syringe. Then, CsF (23 mg, 0.15 mmol) was quickly added to the flask. The mixture was stirred for 20 h at rt. To the mixture was added a saturated aqueous NaHCO<sub>3</sub> solution and extracted with EtOAc thrice. The combined organic phase was dried over Na<sub>2</sub>SO<sub>4</sub> and organic solvents were evaporated to give a crude product. The crude product with PPTS (25 mg, 0.10 mmol) was stirred for 22 h in acetone (0.50 mL). To the mixture was added a saturated aqueous NaHCO<sub>3</sub> solution and extracted with EtOAc thrice. The combined organic phase was dried over Na<sub>2</sub>SO<sub>4</sub> and organic solvents were evaporated to give a crude material. The mixture (*distal*-**19c'**/*proximal*-**19c'** = 76:24, determined by 300 MHz <sup>1</sup>H NMR analysis) was purified by PTLC (toluene/acetone = 5:1) to provide the titled compound *distal*-**19c'** [colorless solid (2.3 mg)] and a mixture of *distal*-**19c'** and *proximal*-**19c'** (2:1, 7.6 mg), and its regiochemistry was determined by NOESY spectra (total 83%). Mp: 222–224 °C. <sup>1</sup>H NMR (500 MHz, DMSO-*d*<sub>6</sub>) δ: 1.38 (3 H, t, *J* = 7.0 Hz), 4.07 (2 H, s), 4.40 (2 H, q, *J* = 7.0 Hz),

7.78 (1 H, s), 8.17 (1 H, s).  $^{13}\text{C}$  NMR (125 MHz, DMSO- $d_6$ )  $\delta$ : 14.4, 50.8, 60.7, 103.6, 115.5, 127.2, 141.3, 142.2, 146.3, 162.1, 190.3. IR (neat): 3274, 2922, 1761, 1717, 1471  $\text{cm}^{-1}$ . HRMS (MALDI) Calcd for  $\text{C}_{12}\text{H}_{11}\text{N}_2\text{O}_3$   $[\text{M}+\text{H}]^+$ : 231.0764, found 231.0765.

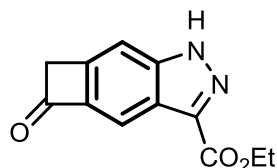

*proximal-19c'*

**Ethyl 5-oxo-5,6-dihydro-1H-cyclobuta[f]indazole-3-carboxylate (*proximal-19c'*) (Table 2, entry 3-2):** Following General Procedure B, a mixture of CsF (0.17 g, 1.1 mmol), 1,1-dimethoxyethylene **6m** (97 mg, 1.1 mmol), and above obtained a mixture of *distal-* and *proximal-17c* (0.15 g, 0.36 mmol, obtained from entry 3-1 of Table 2) was stirred in MeCN (3.0 mL) for 10 h at rt. The crude product was purified by column chromatography on silica gel (hexane/EtOAc = 1:1) to provide two fractions, Fr.1 (42 mg) containing *distal-19c* and *distal-19c'*, and Fr.2 (22 mg) containing *proximal-19c* and *proximal-19c'*. Fr.2 with PPTS (6.0 mg, 25  $\mu\text{mol}$ ) was stirred for 9 h in acetone (0.80 mL). To the mixture was added a saturated aqueous  $\text{NaHCO}_3$  solution and extracted with EtOAc thrice. The combined organic phase was dried over  $\text{Na}_2\text{SO}_4$  and organic solvents were evaporated to give a crude material. The mixture was purified by PTLC (hexane/EtOAc = 1:1) to provide the titled compound *proximal-19c'* as a colorless solid (18 mg, 23%) and its regiochemistry was determined by NOESY spectra. Mp: 132–135  $^\circ\text{C}$ .  $^1\text{H}$  NMR (500 MHz, DMSO- $d_6$ )  $\delta$ : 1.33 (3 H, t,  $J = 7.0$  Hz), 4.01 (2 H, s), 4.35 (2 H, q,  $J = 7.0$  Hz), 7.74 (1 H, d,  $J = 1.0$  Hz), 8.00 (1 H, d,  $J = 1.0$  Hz).  $^{13}\text{C}$  NMR (125 MHz, DMSO- $d_6$ )  $\delta$ : 14.7, 50.9, 61.2, 106.5, 114.3, 123.4, 138.0, 143.3, 145.0, 147.0, 162.2, 189.7. IR (neat): 3250, 2910, 1762, 1722, 1457  $\text{cm}^{-1}$ . HRMS (MALDI) Calcd for  $\text{C}_{12}\text{H}_{11}\text{N}_2\text{O}_3$   $[\text{M}+\text{H}]^+$ : 231.0764, found 231.0765.

### Synthesis of 1,3-benzdiyne equivalent candidate 1a:

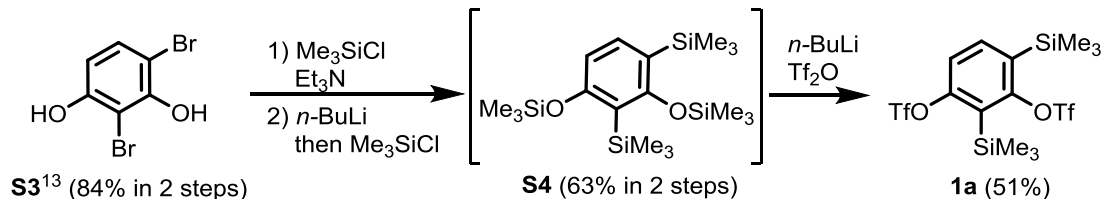

### Scheme S2 Synthesis of 1a.

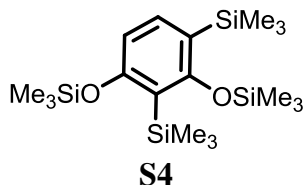

**2,4-Bis(trimethylsilyl)-3,5-bis(trimethylsilyloxy)benzene (S4):** A round-bottom flask was charged with 2,4-dibromobenzene-1,3-diol (**S3**)<sup>13</sup> (3.6 g, 13 mmol) and capped with an inlet adapter with a 3-way stopcock and then evacuated and back-filled with argon. Anhydrous THF (27 mL, 0.50 M), Et<sub>3</sub>N (5.6 mL, 40 mmol) and Me<sub>3</sub>SiCl (5.1 mL, 40 mmol) were added via syringes and the reaction mixture was stirred for 1 h at room temperature. The reaction mixture was concentrated under reduced pressure. Hexane was added to the residue and filtrated through a celite cake and washed with hexane. The filtrate was evaporated to give 2,4-dibromo-1,3-phenylene bistrimethylsilyl ether. Without further purification of the obtained material, anhydrous THF (60 mL, 0.22 M) was added to the flask and the mixture was cooled to  $-78\text{ }^\circ\text{C}$ . *n*-BuLi (1.6 M hexane solution, 25 mL, 40 mmol) was added dropwise at  $-78\text{ }^\circ\text{C}$  and the reaction was allowed to warm to room temperature and stirred for 3 h. Me<sub>3</sub>SiCl (6.5 mL, 54 mmol) was added to the reaction mixture and the mixture was stirred for 1 h. To the reaction mixture was added water for quenching. The mixture was extracted with hexane (this process was repeated three times) and combined organic phase was dried over anhydrous Na<sub>2</sub>SO<sub>4</sub>. The organic phase was filtered and concentrated under reduced pressure to provide the 2,4-bis(trimethylsilyl)-1,3-bis(trimethylsilyloxy)benzene (**S4**) as a colorless oil (3.5 g, 63%). This material was used for next reaction without further purification.



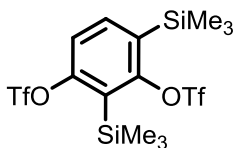

**1a**

**2,4-Bis(trimethylsilyl)-1,3-phenylene bis(trifluoromethanesulfonate) (1a):** **S4** (0.31 g, 0.76 mmol), anhydrous Et<sub>2</sub>O (4.0 mL) was added and the mixture was cooled to  $-78$  °C. *n*-BuLi (1.6 M hexane solution, 1.0 mL, 1.6 mmol) was added dropwise at  $-78$  °C. The reaction was allowed to warm to room temperature and stirred for 2 h. Tf<sub>2</sub>O (0.38 mL, 2.3 mmol) was added to the reaction mixture via syringe at 0 °C and the mixture was stirred for 1 h at room temperature. To the reaction mixture was added water for quenching. The mixture was extracted with hexane (this process was repeated three times) and combined organic phase was dried over anhydrous Na<sub>2</sub>SO<sub>4</sub>. The organic phase was filtered and concentrated under reduced pressure. The crude product was purified by flash column chromatography (hexane) to provide the titled compound **1a** as a colorless oil (0.20 g, 51%). <sup>1</sup>H NMR (500 MHz, CDCl<sub>3</sub>) δ: 0.36 (9 H, s), 0.44 (9 H, s), 7.41 (2 H, d, *J* = 8.5 Hz), 7.65 (2 H, d, *J* = 8.5 Hz). <sup>13</sup>C NMR (125 MHz, CDCl<sub>3</sub>): 0.06, 0.91, 118.4 (q, *J* = 320 Hz), 119.0, 128.5, 135.5, 139.1, 154.8, 156.1. <sup>19</sup>F NMR (470 MHz, CDCl<sub>3</sub>) :  $-73.4$  (s),  $-71.1$  (s). IR (neat): 2950, 1425, 1405 cm<sup>-1</sup>. HRMS (FAB, NBA): *m/z* calcd for C<sub>14</sub>H<sub>20</sub>F<sub>6</sub>O<sub>6</sub>NaS<sub>2</sub>Si<sub>2</sub> [M+Na]<sup>+</sup>: 541.0036, found: 541.0048.

### Synthesis of 1,3-benzdiyne equivalent **1b**:

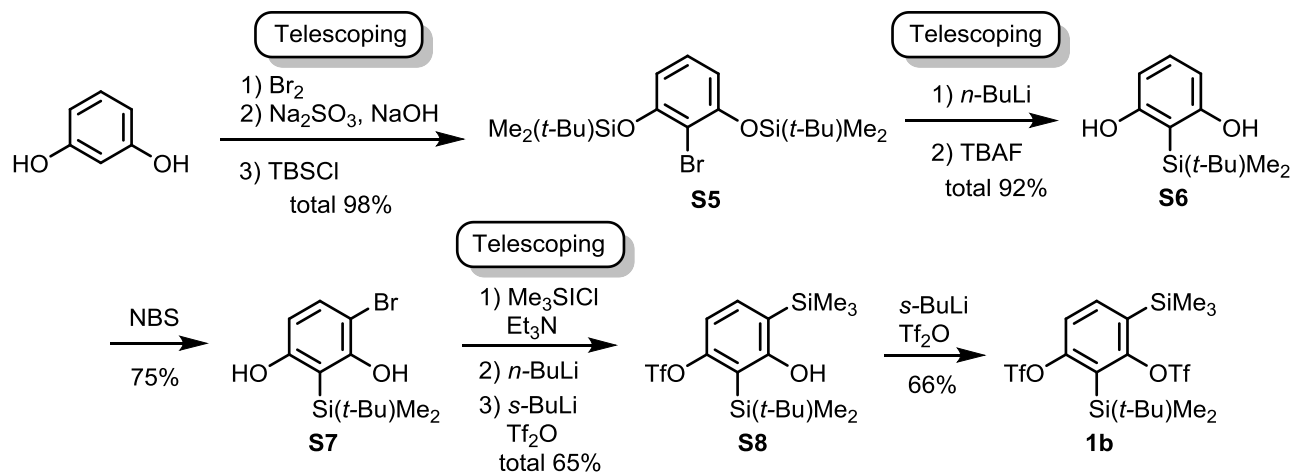

**Scheme S3** Improved synthesis of 2-(*tert*-butyldimethylsilyl)benzene-1,3-diol **S6** and the following synthesis of 1,3-benzdiyne equivalent **1b**.

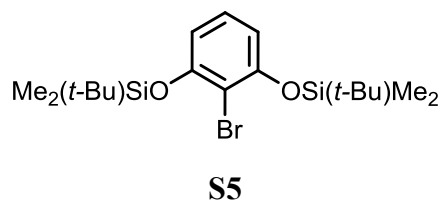

**1,3-Bis(*tert*-butyldimethylsilyloxy)-2-bromobenzene (S5):** To a solution of resorcinol (22 g, 0.20 mol) in CHCl<sub>3</sub> (200 mL, 1.0 M) was added Br<sub>2</sub> (36 mL, 0.70 mol) at 0 °C. After stirring for 5 h at rt, the mixture was concentrated under the reduced pressure to give 2,4,6-tribromo-resorcinol as a white solid (73 g). Without further purification of the obtained material, MeOH (80 mL) was added to the crude material. NaOH (16 g, 0.40 mol) and Na<sub>2</sub>SO<sub>3</sub> (50 g, 0.40 mol) in H<sub>2</sub>O (400 mL) was added to the mixture at rt. After stirring for 5 min at rt, the reaction was stopped by adding 1N HCl aq. (50 mL) and the mixture was concentrated under reduced pressure and then extracted with EtOAc three times. The combined organic extracts were washed with brine, dried over MgSO<sub>4</sub> and concentrated under reduced pressure to give 2-bromoresorcinol as a white solid (41 g). Without further purification of the obtained material, DMF (1.0 L, 0.20 M) were added to the crude material (41 g). Imidazol (41 g, 0.60 mol) and TBSCl (75 g, 0.50 mol) were added to the mixture at rt. After stirring for 6 h at rt, the reaction was stopped by adding H<sub>2</sub>O (200 mL) and the mixture was extracted with

hexane. The organic extract was washed with water, dried over MgSO<sub>4</sub> and concentrated under reduced pressure. The residue was purified by flash column chromatography on silica gel (hexane) to provide the titled compound **S5** (82 g, 98% in 3 steps) as a colourless solid. Mp: 46–48 °C. <sup>1</sup>H NMR (300 MHz, CDCl<sub>3</sub>) δ: 0.23 (12 H, s), 1.04 (18 H, s), 6.50 (2 H, d, *J* = 8.5 Hz), 6.99 (1 H, t, *J* = 8.5 Hz).

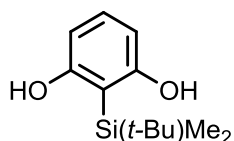

**S6**

**2-(tert-Butyldimethylsilyl)benzene-1,3-diol (S6):**<sup>14</sup> To a solution of **S5** (42 g, 0.10 mol) in THF (500 mL, 0.20 M) was added 2.5 M *n*-BuLi in hexane (44 mL, 0.11 mol) slowly at –78 °C. After stirring for 90 min, the reaction was stopped by adding a saturated aqueous solution of NH<sub>4</sub>Cl (200 mL) and the mixture was extracted with hexane. The combined organic extracts were washed with brine, dried over MgSO<sub>4</sub> and concentrated under reduced pressure to provide 2-(tert-butyl dimethylsilyl)-3-[(tert-butyl dimethylsilyl)oxy]phenol as a brown oil (34 g). Without further purification of the obtained material, THF (1.0 L, 0.10 M) was added to the crude material. TBAF in THF (0.10 L, 0.10 mol) was slowly added to the mixture at 0 °C. After stirring for 5 min, the reaction was stopped by adding a saturated aqueous solution of NH<sub>4</sub>Cl and the mixture was extracted with EtOAc. The combined organic extracts were washed with brine, dried over MgSO<sub>4</sub> and concentrated under reduced pressure. The residue was passed through a silicagel pad using hexane/EtOAc = 5 : 1 and solvents were removed under reduced pressure to produce solid material. The solid was recrystallized from CHCl<sub>3</sub> twice to provide the titled compound **S6** as a colorless solid (20 g, 90%).<sup>14</sup> The mother liquid was concentrated under reduced pressure. Hexane was added to the residue and then cooled to –10 ° to provide **S6** as a colorless solid (0.51 g, 2%). Two-step total yield was 92%. Mp: 144–147 °C. <sup>1</sup>H NMR (500 MHz, CDCl<sub>3</sub>) δ: 0.41 (6 H, s), 0.94 (9 H, s), 5.00 (2 OH, brs), 6.29 (2 H, d, *J* = 8.0 Hz), 7.06 (1 H, t, *J* = 8.0 Hz).

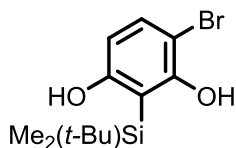

**S7**

**4-Bromo-2-(*tert*-butyldimethylsilyl)resorcinol (S7):** A round-bottom flask was charged with 2-(*tert*-butyldimethylsilyl)resorcinol (**S6**)<sup>14</sup> (4.2 g, 19 mmol) and evacuated and back-filled with argon. MeOH (20 mL) and CCl<sub>4</sub> (200 mL) were sequentially added via syringes and NBS (33 g, 19 mmol) was added portionwise to the solution over 5 min at 0 °C with rigorous stirring. After stirred for 3.5 h at 0 °C, a saturated aqueous solution of Na<sub>2</sub>SO<sub>3</sub> was added to the reaction mixture for quenching. The mixture was extracted with CH<sub>2</sub>Cl<sub>2</sub> (this process was repeated three times) and combined organic phase was dried over anhydrous Na<sub>2</sub>SO<sub>4</sub>. The organic phase was filtered and concentrated under reduced pressure. The crude product was purified by flash column chromatography (hexane/EtOAc = 6:1) to provide the titled compound **S7** as a colorless solid (4.3 g, 75%). Mp: 70–71 °C. <sup>1</sup>H NMR (500 MHz, CDCl<sub>3</sub>) δ: 0.40 (6 H, s), 0.94 (9 H, s), 5.94 (OH, brs), 5.70 (OH, brs), 6.23 (1 H, d, *J* = 8.5 Hz), 7.28 (1 H, d, *J* = 8.5 Hz). <sup>13</sup>C NMR (125 MHz, CDCl<sub>3</sub>) δ: –2.1, 18.5, 26.8, 101.7, 109.3, 109.7, 133.2, 157.2, 161.7. IR (neat): 3506, 2925, 1408 cm<sup>-1</sup>. HRMS (MALDI): *m/z* calcd for C<sub>12</sub>H<sub>18</sub>O<sub>2</sub>SiBr [M–H]<sup>–</sup> 301.0265, found: 301.0260.

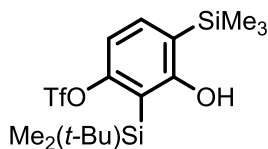

**S8**

**2-(*tert*-Butyltrimethylsilyl)-3-hydroxy-1-(trifluoromethanesulfonyloxy)-4-(trimethylsilyl)benzene (S8):** An oven-dried flask was charged with 4-bromo-2-(*tert*-butyldimethylsilyl)resorcinol (**S7**) (5.0 g, 17 mmol) and evacuated and back-filled with argon. Anhydrous THF (83 mL 0.20 M) was added through the septum via syringe. Me<sub>3</sub>SiCl (6.3 mL, 50 mmol) and Et<sub>3</sub>N (6.9 mL, 50 mmol) were sequentially added via syringes and the reaction mixture was stirred for 1 h at room temperature. The reaction mixture was concentrated under reduced pressure. Hexane was added to the residue and filtrated through a celite cake and washed with hexane. The solution was evaporated to give 4-bromo-2-(*tert*-butyldimethylsilyl)resorcinol bis(trimethylsilyl) ether as a colorless oil (6.3 g). Without further purification of the obtained

material, anhydrous THF (0.14 L, 0.12 M) was added to the flask and the mixture was cooled to  $-78$  °C. *n*-BuLi (2.6 M hexane solution, 11 mL, 28 mmol) was added dropwise at  $-78$  °C and the reaction was allowed to warm to room temperature and stirred for 1 h. To the reaction mixture was added water for quenching. The mixture was extracted with hexane (this process was repeated three times) and combined organic phase was dried over anhydrous  $\text{Na}_2\text{SO}_4$ . The organic phase was filtered and concentrated under reduced pressure. The residue was used without further purification.  $\text{Et}_2\text{O}$  (0.14 L, 0.12 M) was added to the obtained residue and the mixture was cooled to  $-78$  °C. 1.1 M *s*-BuLi in hexane (13 mL, 14 mmol) was added dropwise to the mixture and stirred for 15 min at  $-78$  °C.  $\text{Tf}_2\text{O}$  (2.1 mL, 13 mmol) was added for mixture and then mixture was warmed for rt. After stirring for 2 h at rt, the reaction was stopped by adding a saturated aqueous  $\text{NaHCO}_3$  solution and the mixture was extracted with hexane (this process was repeated three times). The combined organic extracts were washed with brine, dried over  $\text{Na}_2\text{SO}_4$  and concentrated under reduced pressure. The residue was purified by flash column chromatography on silica gel (hexane/ $\text{CH}_2\text{Cl}_2$  = 20:1) to provide the titled compound **S8** as a yellow oil (3.9 g, 65%).  $^1\text{H}$  NMR (400 MHz,  $\text{CDCl}_3$ )  $\delta$ : 0.31 (9 H, s), 0.50 (6 H, s), 0.94 (9 H, s), 5.54 (OH, brs), 6.98 (1 H, d,  $J$  = 8.5 Hz), 7.40 (1 H, d,  $J$  = 8.5 Hz).  $^{13}\text{C}$  NMR (125 MHz,  $\text{CDCl}_3$ )  $\delta$ :  $-1.9$ ,  $-1.0$ , 18.5, 26.5, 110.6, 112.8, 118.5 (q,  $J$  = 320 Hz), 125.1, 138.0, 157.6, 166.9.  $^{19}\text{F}$  NMR (376 MHz,  $\text{CDCl}_3$ )  $\delta$ :  $-73.5$ . IR (neat): 3606, 2956  $\text{cm}^{-1}$ . HRMS (MALDI):  $m/z$  calcd for  $\text{C}_{16}\text{H}_{27}\text{O}_4\text{F}_3\text{NaSi}_2\text{S}$  [ $\text{M}+\text{Na}$ ] $^+$  451.1013, found: 451.1003.

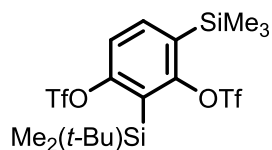

**1b**

**2-(*tert*-Butyldimethylsilyl)-4-(trimethylsilyl)-1,3-bis(trifluoromethanesulfonyloxy)benzene (1b):**

To a solution of **S8** (2.9 g, 6.7 mmol) in CPME (67 mL, 0.10 M) were cooled to  $-78$  °C then *s*-BuLi (13 mL, 13 mmol) was added dropwise and stirred for 15 min at  $0$  °C. Then  $\text{Tf}_2\text{O}$  (5.6 mL, 34 mmol) was added. After stirring for 4 h at  $0$  °C, the reaction was stopped by adding a saturated aqueous  $\text{NaHCO}_3$  solution (50 mL) and the mixture was extracted with hexane (this process was repeated three times). The combined organic extracts were washed with brine, dried over  $\text{Na}_2\text{SO}_4$  and concentrated under reduced pressure. The residue was purified by flash column chromatography on silica gel (hexane) to provide the titled compound **1b** with a small amount of by-product (2.9 g).

Gel-permeation chromatography (GPC) was applied to remove the by-product completely to provide **1b** as a colorless oil (2.4 g, 66%).  $^1\text{H}$  NMR (500 MHz,  $\text{CDCl}_3$ )  $\delta$ : 0.36 (9 H, s), 0.51 (6 H, s), 0.78 (9 H, s), 7.47 (1 H, d,  $J = 8.5$  Hz), 7.64 (1 H, d,  $J = 8.5$  Hz).  $^{13}\text{C}$  NMR (125 MHz,  $\text{CDCl}_3$ )  $\delta$ : -1.7, 0.3, 19.1, 27.1, 118.4, 118.5 (q,  $J = 322$  Hz), 125.1, 135.4, 138.9, 155.7, 156.5.  $^{19}\text{F}$  NMR (470 MHz,  $\text{CDCl}_3$ )  $\delta$ : -72.7, -69.6. IR (neat): 2956, 1427  $\text{cm}^{-1}$ . HRMS (MALDI):  $m/z$  calcd for  $\text{C}_{17}\text{H}_{26}\text{O}_6\text{F}_6\text{NaSi}_2\text{S}_2$   $[\text{M}+\text{Na}]^+$  583.0506, found: 583.0506.

## Syntheses of 1,4-benzdiyne equivalent **15**:<sup>15-17</sup>

(i) Previously reported synthesis of 1,4-benzdiyne equivalent **15**<sup>15,16</sup>

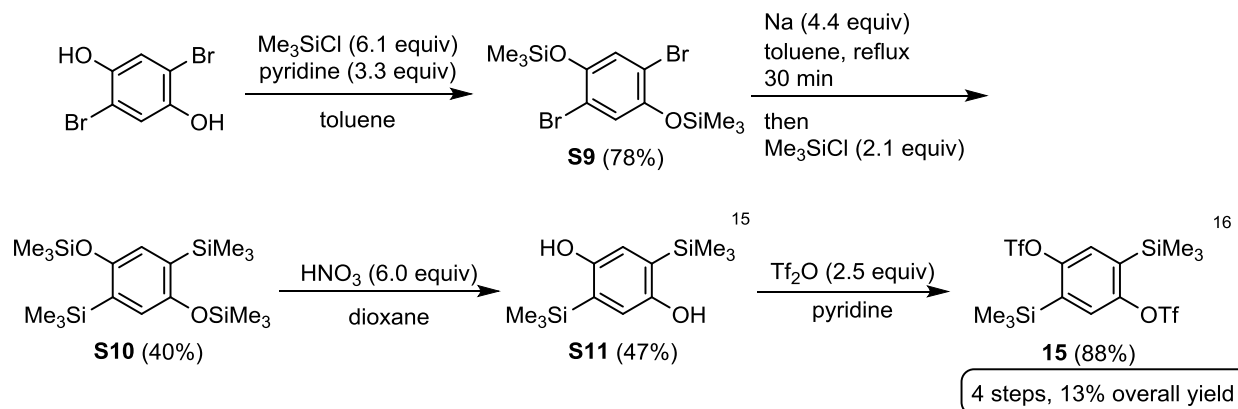

(ii) Another report for the synthesis of 1,4-benzdiyne equivalent **15**<sup>17</sup>

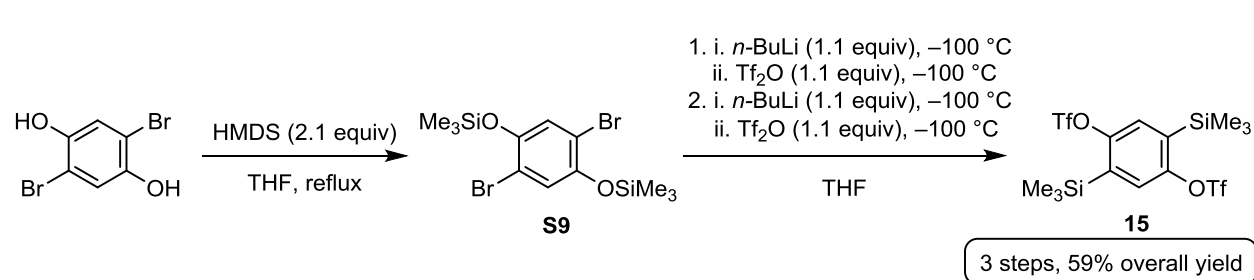

(iii) Our synthesis of 1,4-benzdiyne equivalent **15**

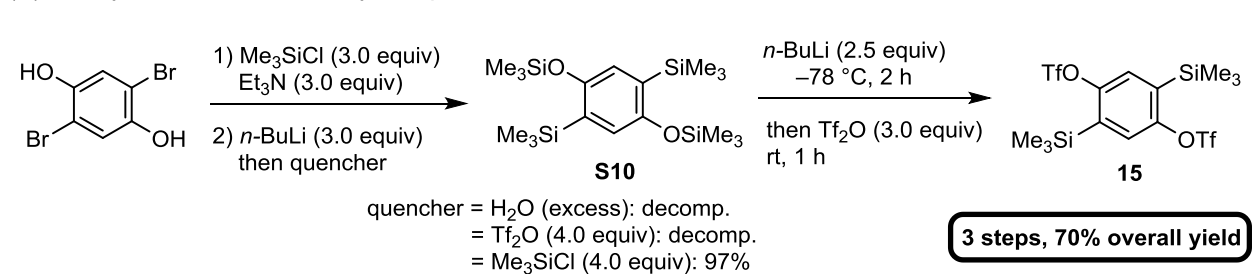

**Scheme S4** Comparison among previously reported syntheses (i), (ii) and our synthesis (iii) of **15**.

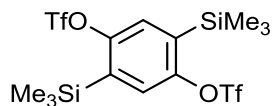

**15**

**2,4-Bis(trimethylsilyl)-1,3-bis(trifluoromethanesulfonyloxy)benzene (15):**<sup>1,15-17</sup> To a solution of 2,6-dibromohydroquinone (5.0 g, 19 mmol) in THF (94 mL, 0.20 M) were added Me<sub>3</sub>SiCl (6.1 mL, 56 mmol) and Et<sub>3</sub>N (7.8 mL, 56 mmol) at rt. After stirring for 1 h at rt, the reaction mixture was evaporated and the residue was filtered through a celite pad with hexane. The filtrate was concentrated under reduced pressure to provide the 2,5-dibromo-1,4-bis(trimethylsilyloxy)benzene **S9**. Without further purification of the obtained material, THF (94 mL, 0.20 M) was added to the crude material. The mixture was cooled to -78 °C and then *n*-BuLi (2.5 M in hexane, 22 mL, 56 mmol) was added dropwise and it was stirred for 1 h. Then Me<sub>3</sub>SiCl (9.5 mL, 74 mmol) was added to the mixture and the mixture was warmed to room temperature. After 1 h, the reaction was stopped with water and extracted with hexane (this process was repeated three times). The combined organic extracts were washed with brine, dried over Na<sub>2</sub>SO<sub>4</sub> and concentrated under reduced pressure to provide **S10**. Without further purification of the obtained material, Et<sub>2</sub>O (94 mL, 0.20 M) was added to the crude material. The mixture was cooled to -78 °C and then *n*-BuLi (2.5 M in hexane, 16 mL, 41 mmol) was added dropwise and it was stirred for 2 h at rt. Then the mixture was cooled to 0 °C and Tf<sub>2</sub>O (9.4 mL, 56 mmol) was added to the mixture and stirred for 1 h at rt. The reaction was quenched by adding water and extracted with hexane (this process was repeated three times). The combined organic extracts were washed with brine, dried over Na<sub>2</sub>SO<sub>4</sub> and concentrated under reduced pressure. The residue was purified by flash column chromatography on silica gel (hexane) and then recrystallized from hexane to provide the titled compound **15** as a colorless solid (6.8 g, 70%). Mp: 105–107 °C. <sup>1</sup>H NMR (300 MHz, CDCl<sub>3</sub>) δ: 0.38 (18 H, s), 7.44 (2 H, s). <sup>13</sup>C NMR (125 MHz, CDCl<sub>3</sub>) δ: -1.28, 118.4 (q, *J* = 322 Hz), 126.9, 137.4, 153.0. <sup>19</sup>F NMR (470 MHz, CDCl<sub>3</sub>) δ: -81.7. IR (neat): 2964, 1418 cm<sup>-1</sup>. HRMS (FAB, NBA): *m/z* calcd for C<sub>14</sub>H<sub>20</sub>O<sub>6</sub>F<sub>6</sub>NaSi<sub>2</sub>S<sub>2</sub> [M+Na]<sup>+</sup> 541.0036, found: 541.0062 .



Cartesian coordinates of optimized structures of 4,5-benzotriazolynes **5b** and 4,5-indolynes **5b'** by DFT calculation [B3LYP/6-31G(d)]:

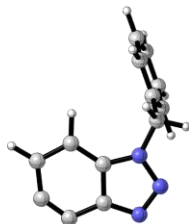

**5b**

|    |   |            |            |            |
|----|---|------------|------------|------------|
| 1  | C | 2.3484460  | 2.3419730  | -0.0399380 |
| 2  | C | 1.3396390  | 1.4822160  | -0.4942080 |
| 3  | C | 1.4759020  | 0.0894790  | -0.2865460 |
| 4  | C | 2.5904930  | -0.5152420 | 0.3750240  |
| 5  | C | 3.5443220  | 0.4186870  | 0.7904050  |
| 6  | C | 3.3810980  | 1.6361680  | 0.5810600  |
| 7  | H | 2.2877920  | 3.4161970  | -0.1720430 |
| 8  | H | 0.4611040  | 1.8906510  | -0.9835090 |
| 9  | N | 1.2837160  | -2.1422850 | -0.1698670 |
| 10 | N | 2.4091070  | -1.8700980 | 0.4139500  |
| 11 | N | 0.6982580  | -0.9861870 | -0.6061380 |
| 12 | C | -0.5853580 | -1.0492630 | -1.2955540 |
| 13 | H | -0.4836100 | -0.5619990 | -2.2717590 |
| 14 | H | -0.7542580 | -2.1161760 | -1.4712090 |
| 15 | C | -1.7276770 | -0.4313490 | -0.5109220 |
| 16 | C | -1.9799990 | -0.8298620 | 0.8084110  |
| 17 | C | -2.5587700 | 0.5226200  | -1.1060870 |
| 18 | C | -3.0456230 | -0.2792270 | 1.5177440  |
| 19 | H | -1.3363470 | -1.5698670 | 1.2774210  |
| 20 | C | -3.6305960 | 1.0712370  | -0.3976700 |
| 21 | H | -2.3717530 | 0.8355990  | -2.1313910 |
| 22 | C | -3.8743200 | 0.6722670  | 0.9161170  |
| 23 | H | -3.2316630 | -0.5939450 | 2.5409580  |

|    |   |            |           |            |
|----|---|------------|-----------|------------|
| 24 | H | -4.2691870 | 1.8114970 | -0.8719660 |
| 25 | H | -4.7049990 | 1.0998140 | 1.4708760  |

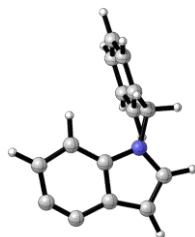

**5b'**

|    |   |            |            |            |
|----|---|------------|------------|------------|
| 1  | C | 3.5263030  | 0.6319310  | 0.7016330  |
| 2  | C | 3.2966670  | 1.8297510  | 0.4435120  |
| 3  | C | 2.1932010  | 2.4024690  | -0.1915520 |
| 4  | C | 1.2547520  | 1.4260890  | -0.5626250 |
| 5  | C | 1.4956820  | 0.0626440  | -0.2848650 |
| 6  | C | 2.6761940  | -0.4288350 | 0.3868750  |
| 7  | H | 2.0330440  | 3.4567500  | -0.3888170 |
| 8  | H | 0.3334060  | 1.7313490  | -1.0504620 |
| 9  | N | 0.7149840  | -1.0462710 | -0.5713090 |
| 10 | C | -0.5651610 | -1.0375020 | -1.2619440 |
| 11 | H | -0.4517640 | -0.5096690 | -2.2170250 |
| 12 | H | -0.7933870 | -2.0813080 | -1.5089960 |
| 13 | C | -1.7126610 | -0.4261320 | -0.4716260 |
| 14 | C | -2.7126210 | 0.2864430  | -1.1427080 |
| 15 | C | -1.8164000 | -0.6002400 | 0.9132900  |
| 16 | C | -3.8040910 | 0.8086010  | -0.4464500 |
| 17 | H | -2.6377820 | 0.4347240  | -2.2182930 |
| 18 | C | -2.9032900 | -0.0741830 | 1.6113190  |
| 19 | H | -1.0374370 | -1.1382250 | 1.4466140  |
| 20 | C | -3.9016950 | 0.6293120  | 0.9338330  |
| 21 | H | -4.5715480 | 1.3615520  | -0.9815240 |

|    |   |            |            |            |
|----|---|------------|------------|------------|
| 22 | H | -2.9689500 | -0.2118330 | 2.6873070  |
| 23 | H | -4.7467840 | 1.0398960  | 1.4796740  |
| 24 | C | 1.3617300  | -2.1765840 | -0.1042620 |
| 25 | H | 0.9050050  | -3.1475000 | -0.2431510 |
| 26 | C | 2.5563860  | -1.8464990 | 0.4863730  |
| 27 | H | 3.2613490  | -2.5354240 | 0.9290060  |

## Experimental references:

- (1) (a) H. M. Duong, M. Bendikov, H. Steiger, Q. Zhang, G. Sonmez, G. Yamada and G. Wudl, *Org. Lett.*, 2003, **5**, 4433–4436; (b) D. Rodríguez-Lojo, A. Cobas, D. Peña, D. Pérez and E. Guitián, *Org. Lett.*, 2012, **14**, 1363–1365; (c) B. Schuler, S. Collazos, L. Gross, G. Meyer, D. Pérez, E. Guitián and D. Peña, *Angew. Chem. Int. Ed.*, 2014, **53**, 9004–9006. (d) D. Rodríguez-Lojo, D. Peña, D. Pérez and E. Guitián, *Synlett*, 2015, **26**, 1633–1637.
- (2) Houk and Garg et al. have reported that distortions of arynes are useful to predict and understand the regioselectivities of aryne reactions, see: (a) P. H.-Y. Cheong, R. S. Paton, S. M. Bronner, G.-Y. J. Im, N. K. Garg and K. N. Houk, *J. Am. Chem. Soc.*, 2010, **132**, 1267–1269; (b) G.-Y. J. Im, S. M. Bronner, A. E. Goetz, R. S. Paton, P. H.-Y. Cheong, K. N. Houk and N. K. Garg, *J. Am. Chem. Soc.*, 2010, **132**, 17933–17944; (c) S. M. Bronner, J. L. Mackey, K. N. Houk and N. K. Garg, *J. Am. Chem. Soc.*, 2012, **134**, 13966–13969.
- (3) For a natural bond orbital (NBO) method, see: (a) K. B. Wiberg, *Tetrahedron*, 1968, **24**, 1083–1096; (b) J. P. Foster and F. Weinhold, *J. Am. Chem. Soc.*, 1980, **102**, 7211–7218; (c) A. E. Reed, R. B. Weinstock and F. Weinhold, *J. Chem. Phys.*, 1985, **83**, 735–746.
- (4) For recent reports on the NBO analysis of benzynes, see: (a) A. Takagi, T. Ikawa, Y. Kurita, K. Saito, K. Azechi, M. Egi, Y. Itoh, H. Tokiwa, Y. Kita and S. Akai, *Tetrahedron*, 2013, **69**, 4338–4352; (b) A. Takagi, T. Ikawa, K. Saito, S. Masuda, T. Ito and S. Akai, *Org. Biomol. Chem.*, 2013, **11**, 8145–8150.
- (5) The natural “localized” molecular orbital (NLMO) based on natural bond orbital (NBO) interpretations could give chemists actual chemical and even quantitative insights without a methodology/basis set-dependency. For a review on NBO analysis, see: A. E. Reed, L. A. Curtiss and F. Weinhold, *Chem. Rev.*, 1988, **88**, 899–926.
- (6) Electron density  $\rho_{CA}^i$  of the  $i^{\text{th}}$  (reacting  $\pi$ ) NBO of carbon atom  $C_A$  ( $A = 1$  or  $2$ ) was calculated as

$$\rho_{CA}^i = n_i \times d_{CA}$$

where  $n^i$  is occupancy of the  $i^{\text{th}}$  NBO and  $d_{CA}$  is percentage contribution from each carbon atom  $C_A$  for the  $i^{\text{th}}$  NBO (Fig. S3).

- (7) All calculations were performed using the Gaussian 09, Revision D.01, M. J. Frisch, G. W. Trucks, H. B. Schlegel, G. E. Scuseria, M. A. Robb, J. R. Cheeseman, G. Scalmani, V.

- Barone, B. Mennucci, G. A. Petersson, H. Nakatsuji, M. Caricato, X. Li, H. P. Hratchian, A. F. Izmaylov, J. Bloino, G. Zheng, J. L. Sonnenberg, M. Hada, M. Ehara, K. Toyota, R. Fukuda, J. Hasegawa, M. Ishida, T. Nakajima, Y. Honda, O. Kitao, H. Nakai, T. Vreven, J. A. Montgomery, Jr., J. E. Peralta, F. Ogliaro, M. Bearpark, J. J. Heyd, E. Brothers, K. N. Kudin, V. N. Staroverov, R. Kobayashi, J. Normand, K. Raghavachari, A. Rendell, J. C. Burant, S. S. Iyengar, J. Tomasi, M. Cossi, N. Rega, J. M. Millam, M. Klene, J. E. Knox, J. B. Cross, V. Bakken, C. Adamo, J. Jaramillo, R. Gomperts, R. E. Stratmann, O. Yazyev, A. J. Austin, R. Cammi, C. Pomelli, J. W. Ochterski, R. L. Martin, K. Morokuma, V. G. Zakrzewski, G. A. Voth, P. Salvador, J. J. Dannenberg, S. Dapprich, A. D. Daniels, Ö. Farkas, J. B. Foresman, J. V. Ortiz, J. Cioslowski, and D. J. Fox, Gaussian, Inc., Wallingford CT, 2009.
- (8) The graphics for Fig. S3 were prepared with CYLview, 1.0b: C. Y. Legault, Université de Sherbrooke, 2009 (<http://www.cylview.org>).
- (9) (a) A. R. Evans and G. A. Taylor, *J. Chem. Soc., Perkin Trans. 1*, 1983, 979–983. (b) J. W. Bode, Y. Hachisu, T. Matsuura and K. Suzuki, *Tetrahedron Lett.*, 2003, **44**, 3555–3558; (c) J. W. Bode, Y. Hachisu, T. Matsuura and K. Suzuki, *Org. Lett.*, 2003, **5**, 391–394; (d) T. Matsuura, J. W. Bode, Y. Hachisu and K. Suzuki, *Synlett*, 2003, 1746–1748.
- (10) A. Rodriguez and W. J. Moran, *Synthesis*, 2009, 650–654.
- (11) M. M. Maluleka and M. J. Mphahlele, *Tetrahedron*, 2013, **69**, 699–704.
- (12) W. C. Still, M. Kahn and A. Mitra, *J. Org. Chem.*, 1978, **43**, 2923–2925.
- (13) E. Kiehlmann and R. W. Lauener, *Can. J. Chem.*, 1989, **67**, 335–344.
- (14) T. Ikawa, H. Kaneko, S. Masuda, E. Ishitsubo, H. Tokiwa and S. Akai, *Org. Biomol. Chem.*, 2015, **13**, 520–526.
- (15) H. Bock, S. Nick and K. Z. Ruppert, *Naturforsch*, 1995, **50**, 595–604.
- (16) H. M. Duong, M. Bendikov, D. Steiger, Q. Zhang, G. Sonmez, J. Yamada and F. Wudl, *Org. Lett.*, 2003, **5**, 4433–4436.
- (17) Very recently, a modified one-pot procedure was reported. This method might be better than before;<sup>16</sup> however, careful temperature control appeared to be important around –100 °C and the yield was 59%; see, N. Pavliček, B. Schuler, S. Collazos, N. Moll, D. Pérez, E. Guitián, G. Meyer, D. Peña and L. Gross, *Nat. Chem.*, 2015, **7**, 623–628.

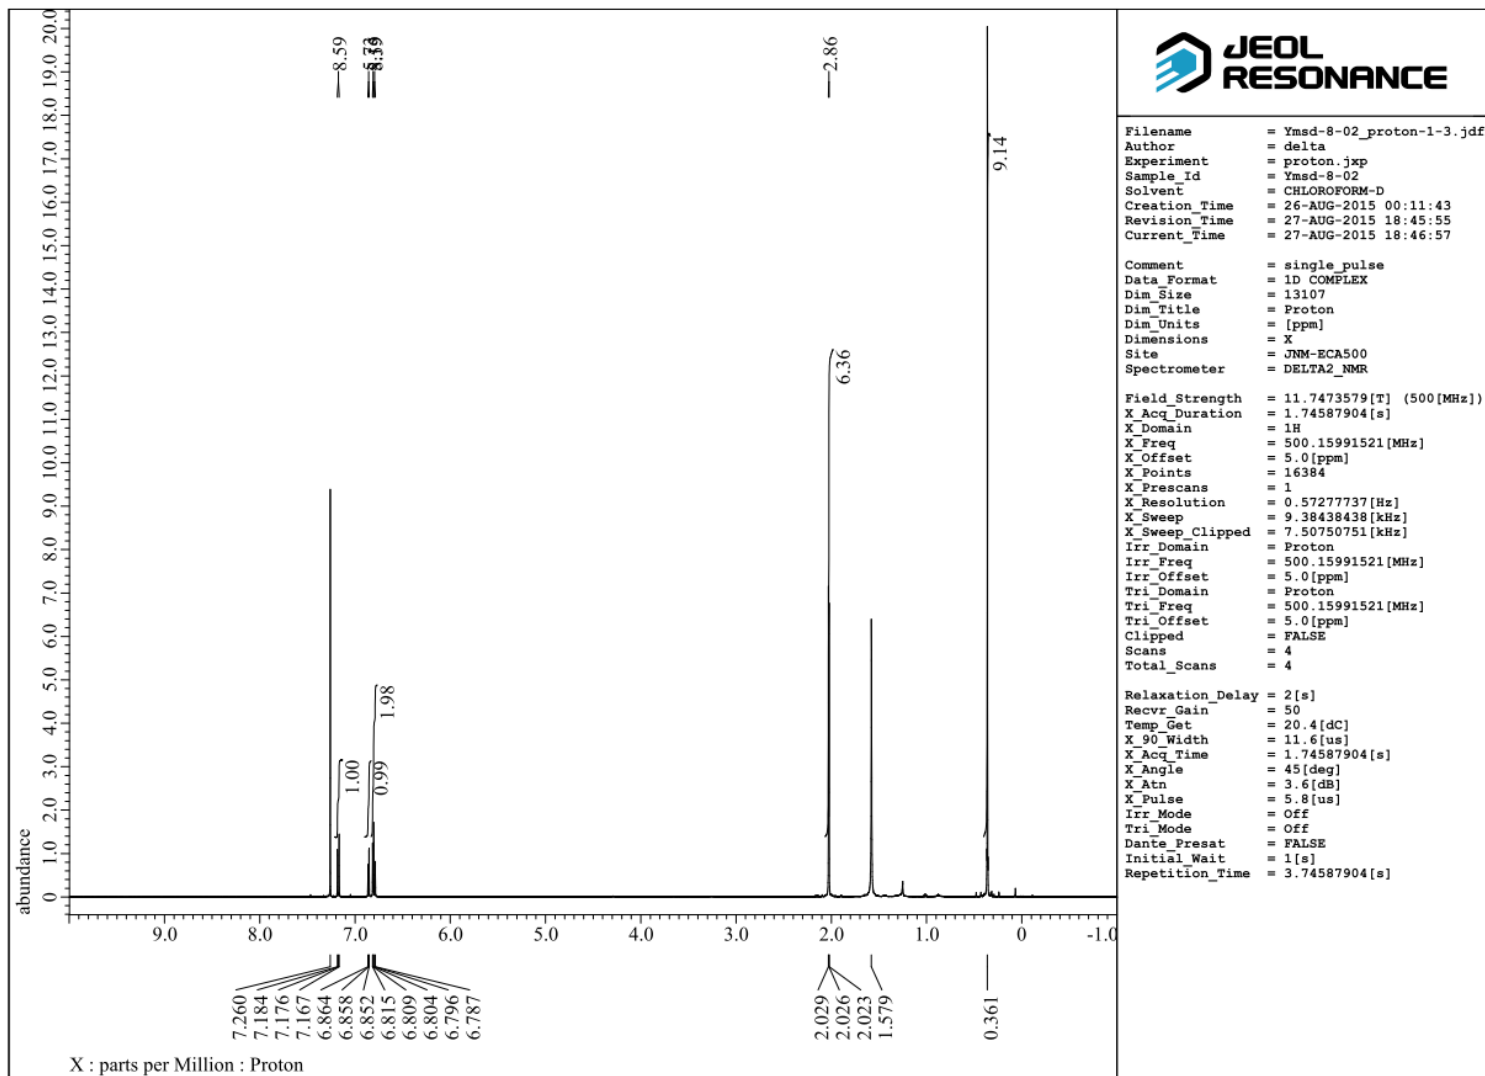

You created this PDF from an application that is not licensed to print to novaPDF printer (<http://www.novapdf.com>)

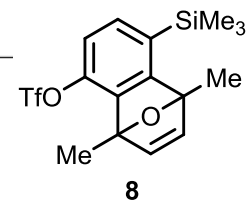

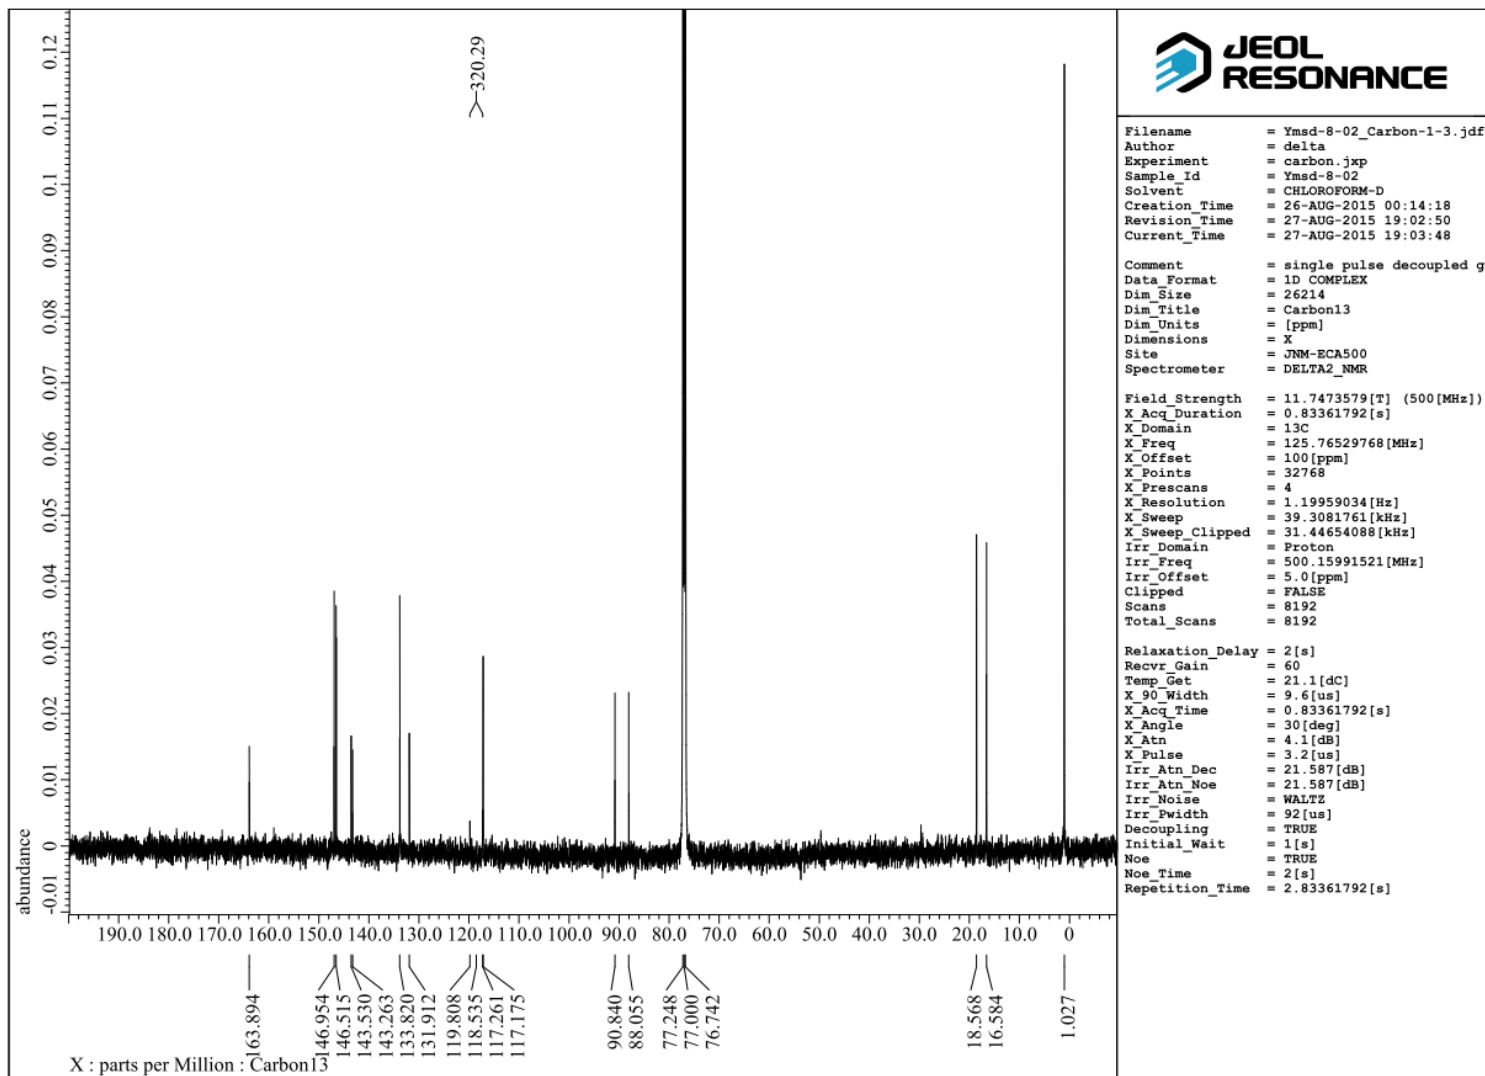

You created this PDF from an application that is not licensed to print to novaPDF printer (<http://www.novapdf.com>)

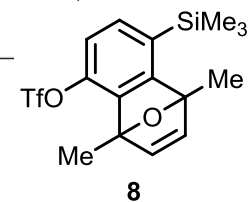

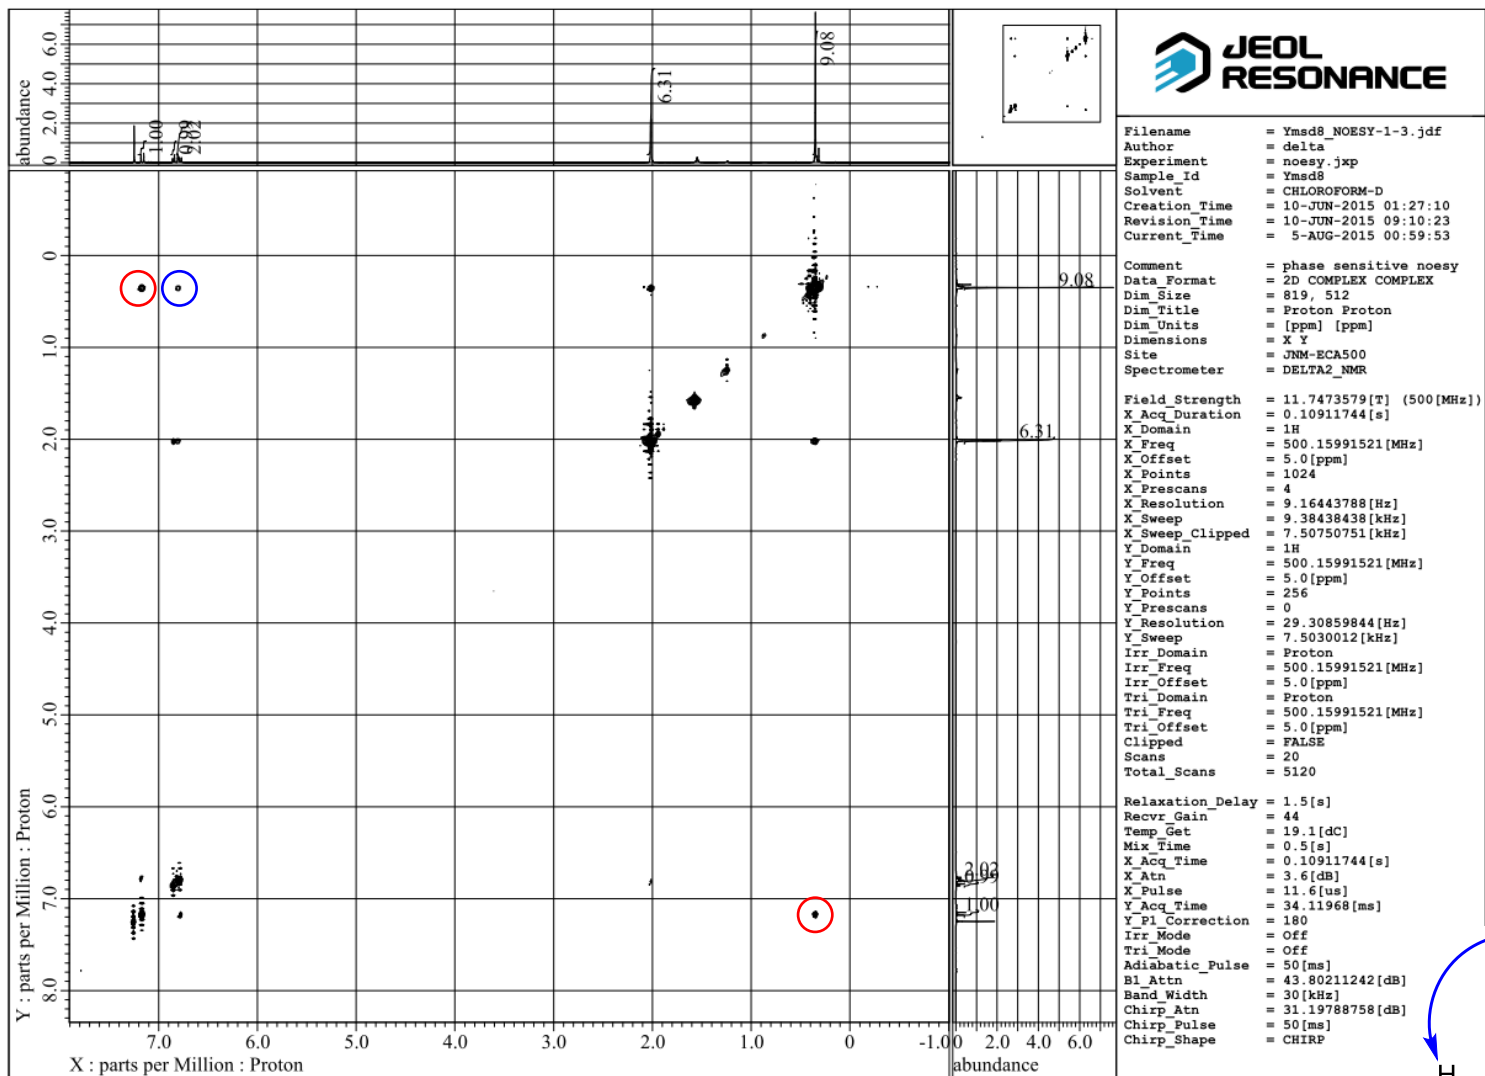

You created this PDF from an application that is not licensed to print to novaPDF printer (<http://www.novapdf.com>)

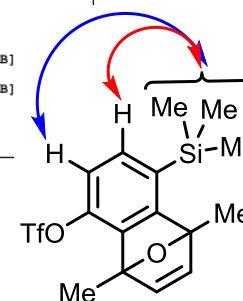

8



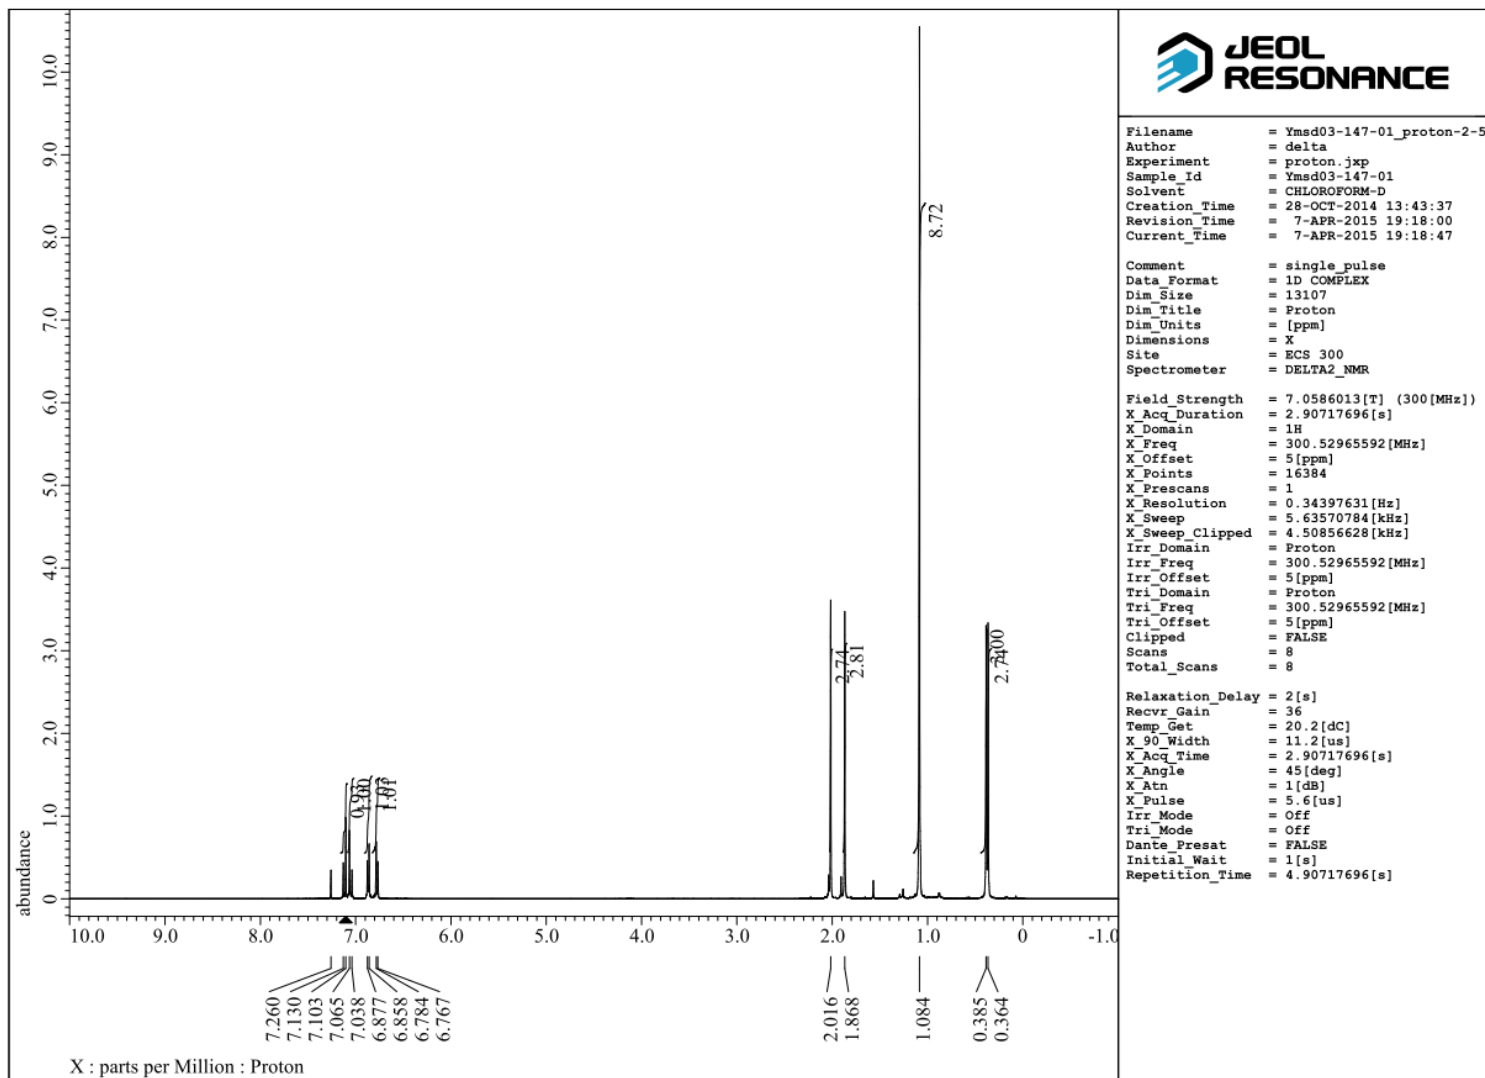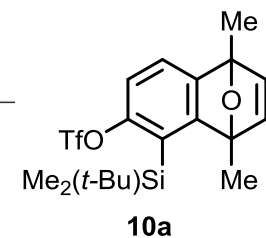

You created this PDF from an application that is not licensed to print to novaPDF printer (<http://www.novapdf.com>)

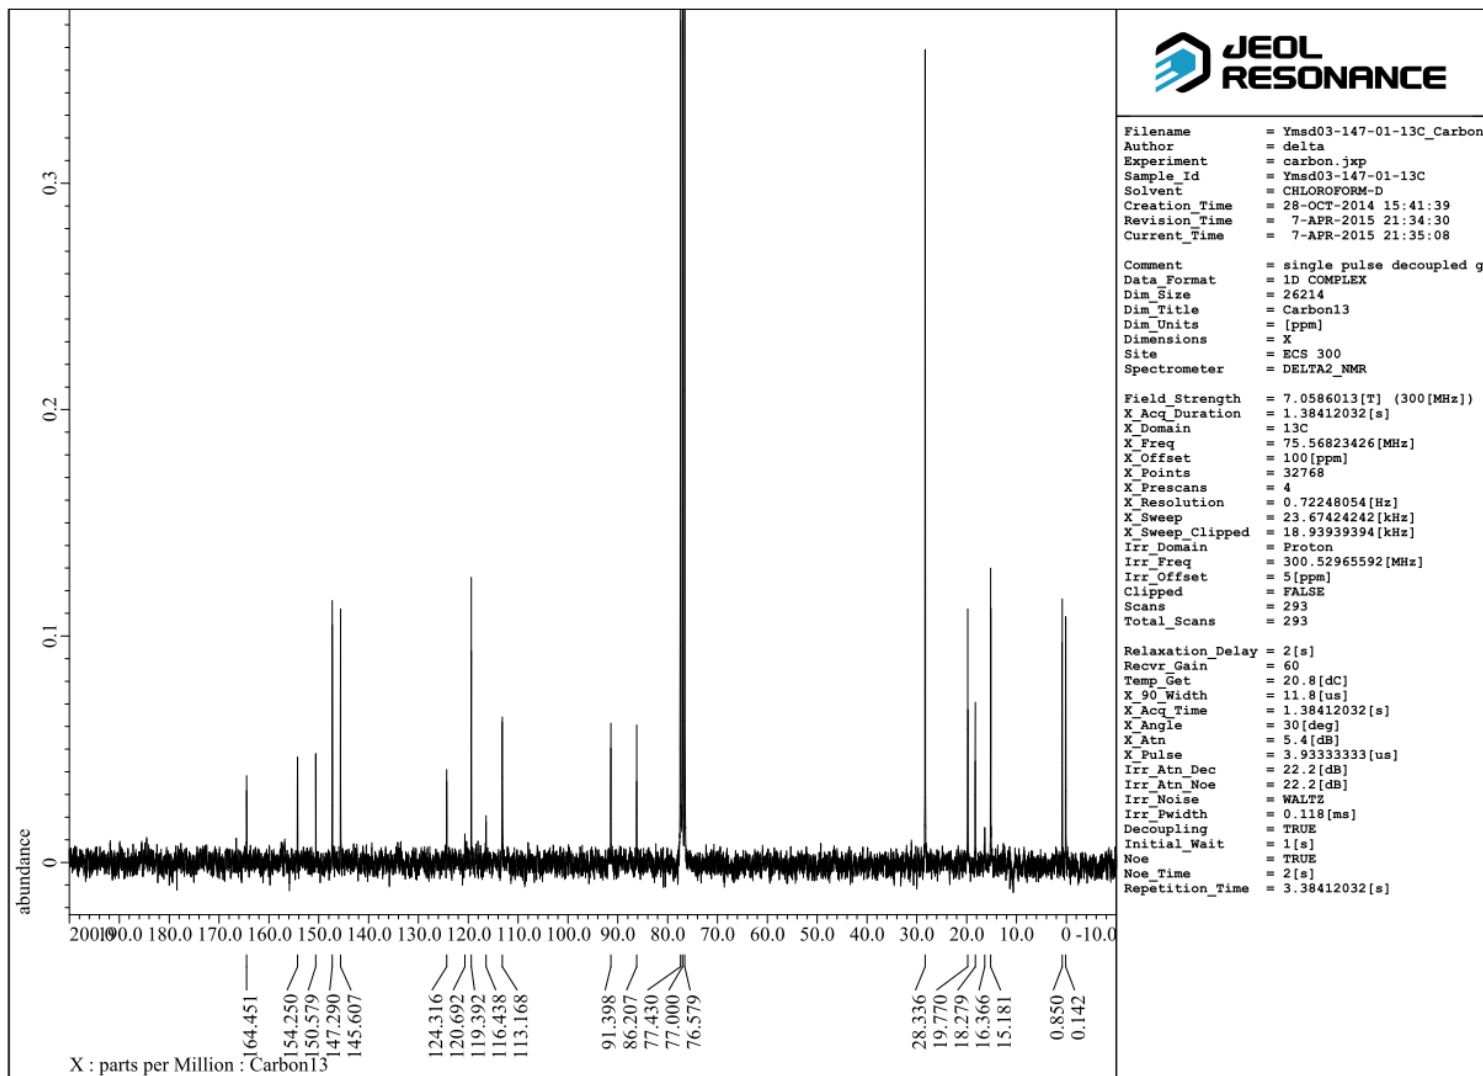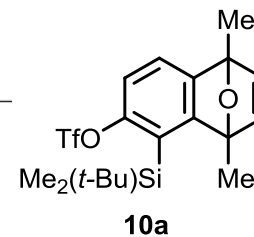

You created this PDF from an application that is not licensed to print to novaPDF printer (<http://www.novapdf.com>)

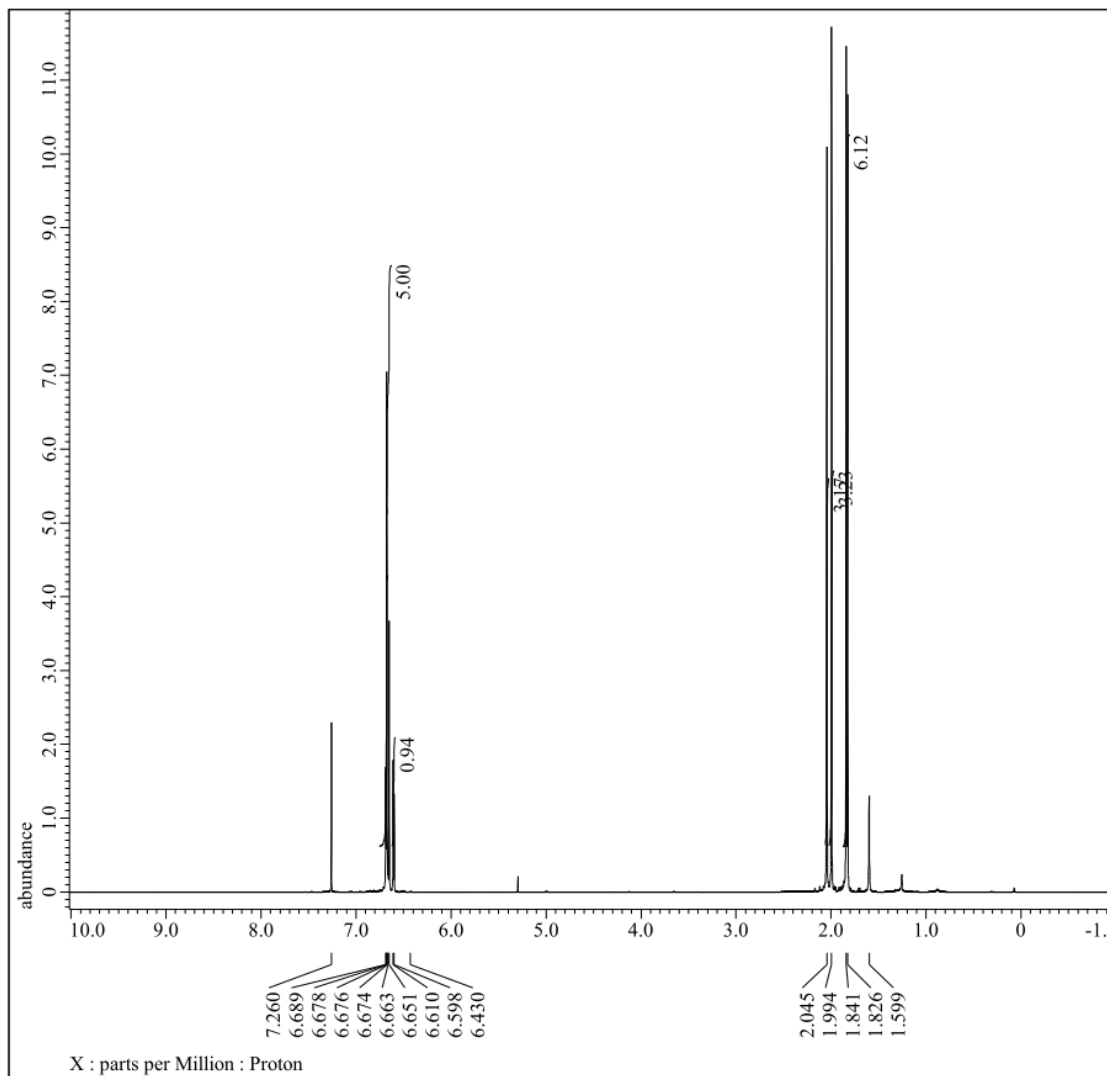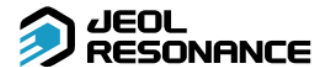

```

Filename      = Ymsd05-190-03_proton-1-5
Author       = delta
Experiment   = proton_jxp
Sample_id    = Ymsd05-190-03
Solvent      = CHLOROFORM-D
Creation_Time = 12-NOV-2015 12:05:57
Revision_Time = 13-NOV-2015 11:33:21
Current_Time  = 13-NOV-2015 11:34:08

Comment      = single pulse
Data Format   = 1D COMPLEX
Dim Size     = 13107
Dim Title    = Proton
Dim Units    = [ppm]
Dimensions   = X
Site         = JNM-ECA500
Spectrometer = DELTA2_NMR

Field Strength = 11.7473579[T] (500[MHz])
X_Acq_Duration = 1.74587904[s]
X_Domain       = 1H
X_Freq         = 500.15991521[MHz]
X_Offset       = 5.0[ppm]
X_Points      = 16384
X_Prescans    = 1
X_Resolution  = 0.57277737[Hz]
X_Sweep       = 9.38438438[kHz]
X_Sweep_Clip  = 7.50750751[kHz]
Irr_Domain    = Proton
Irr_Freq      = 500.15991521[MHz]
Irr_Offset    = 5.0[ppm]
Tri_Domain    = Proton
Tri_Freq      = 500.15991521[MHz]
Tri_Offset    = 5.0[ppm]
Clipped       = FALSE
Scans         = 16
Total_Scans   = 16

Relaxation_Delay = 2[s]
Recvr_Gain       = 40
Temp_Get        = 20.7[dC]
X_90_Width     = 11.6[us]
X_Acq_Time     = 1.74587904[s]
X_Angle        = 45[deg]
X_Atn          = 3.6[dB]
X_Pulse        = 5.8[us]
Irr_Mode       = Off
Tri_Mode       = Off
Dante_Presat   = FALSE
Initial_Wait    = 1[s]
Repetition_Time = 3.74587904[s]
  
```

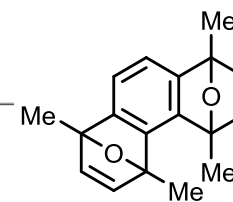

3a

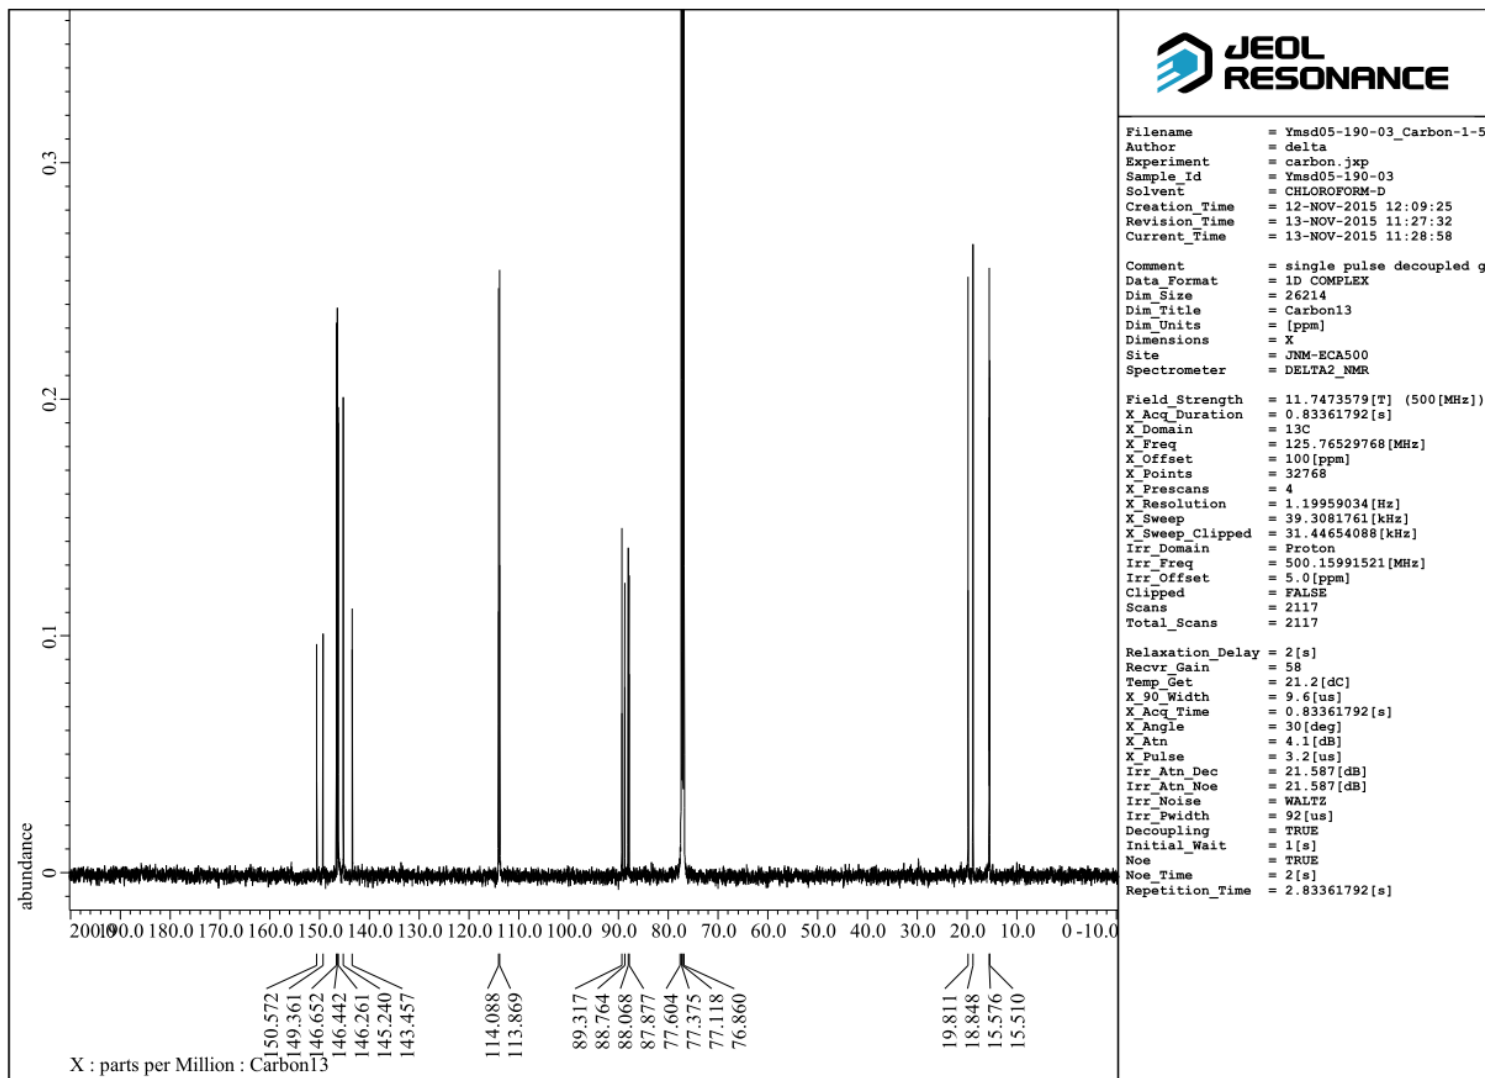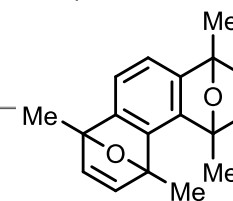

3a

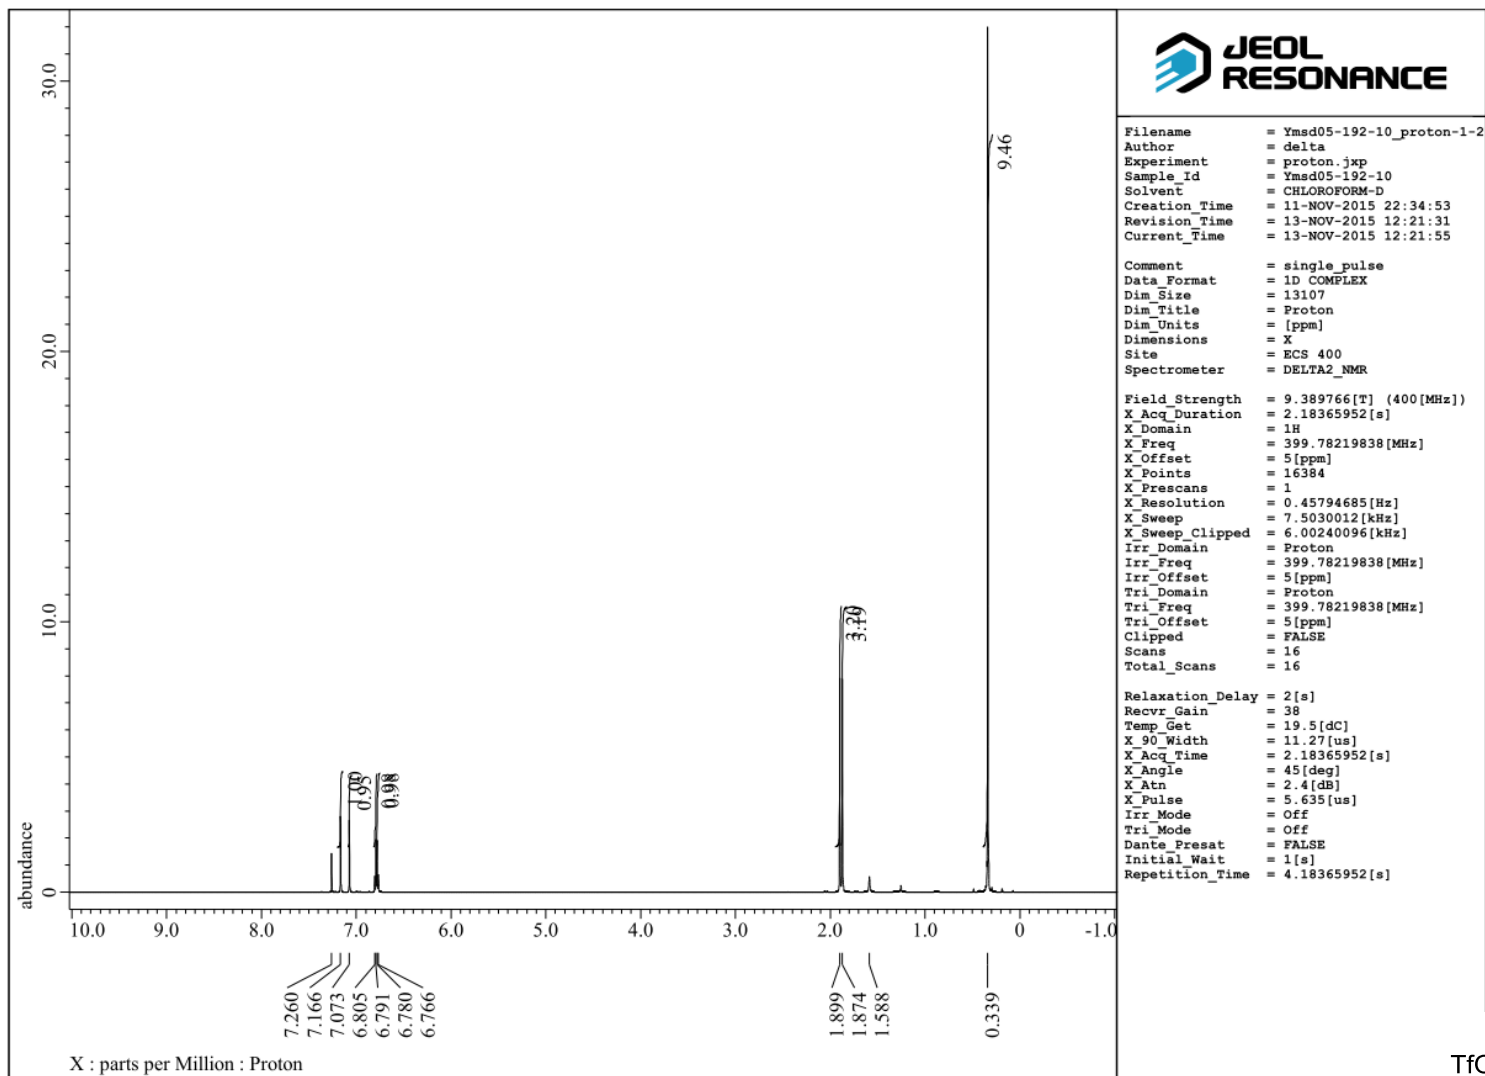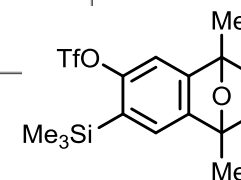

S1

You created this PDF from an application that is not licensed to print to novaPDF printer (<http://www.novapdf.com>)

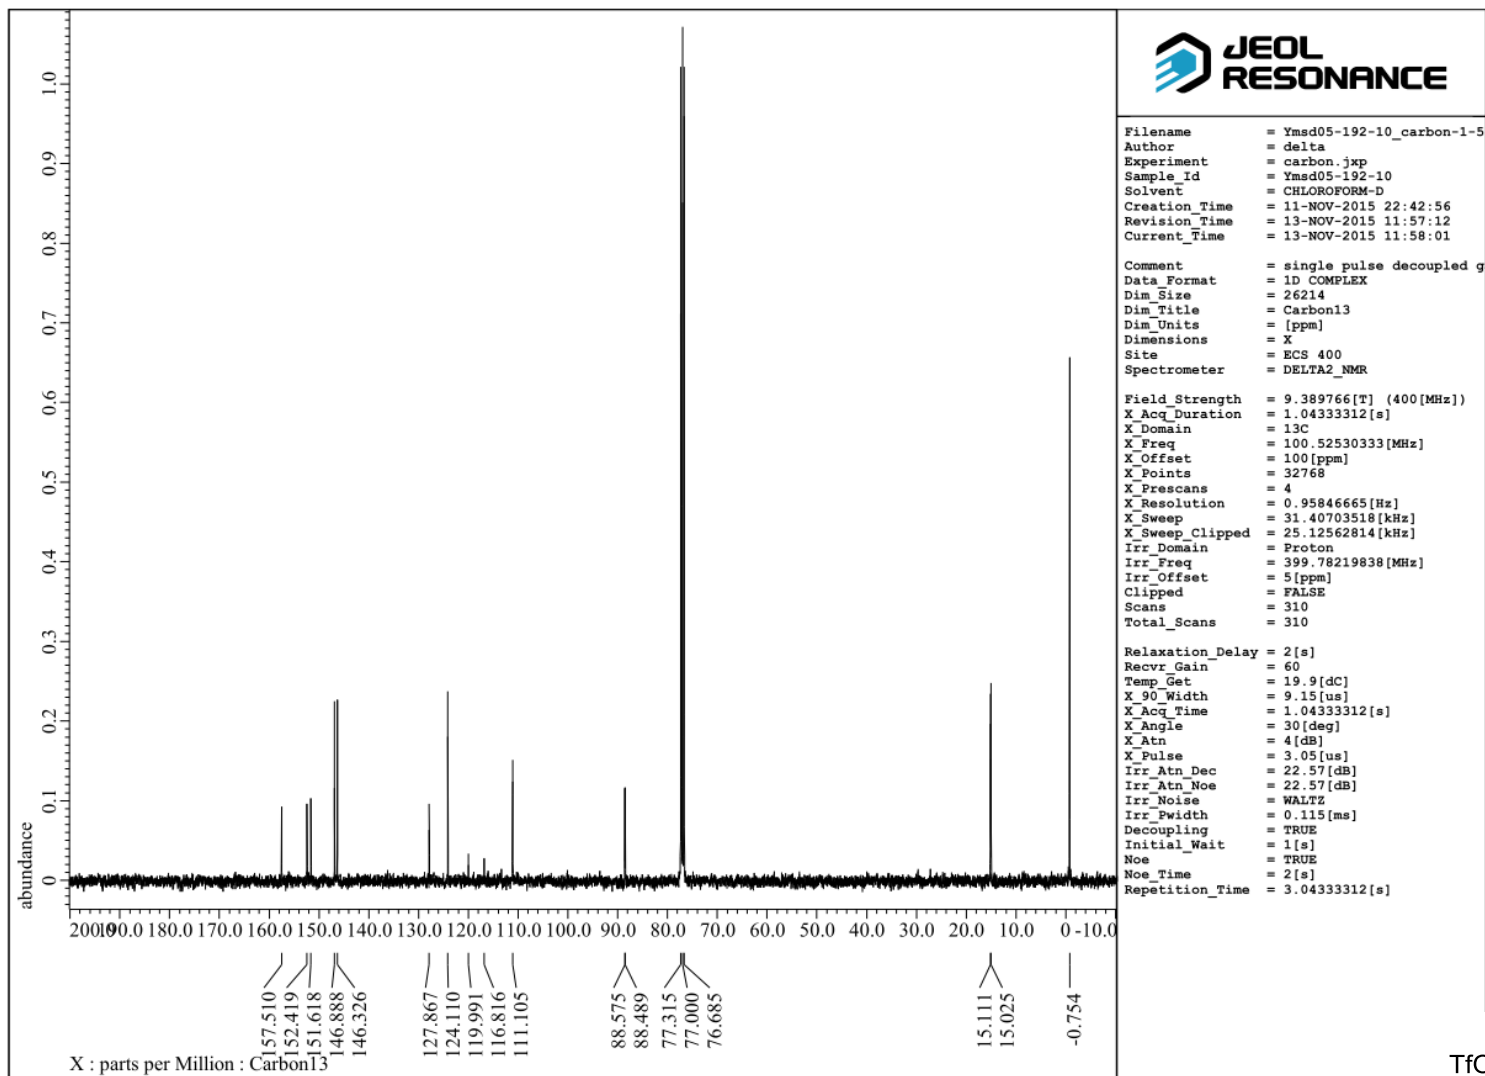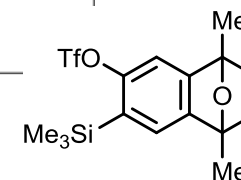

S1

You created this PDF from an application that is not licensed to print to novaPDF printer (<http://www.novapdf.com>)

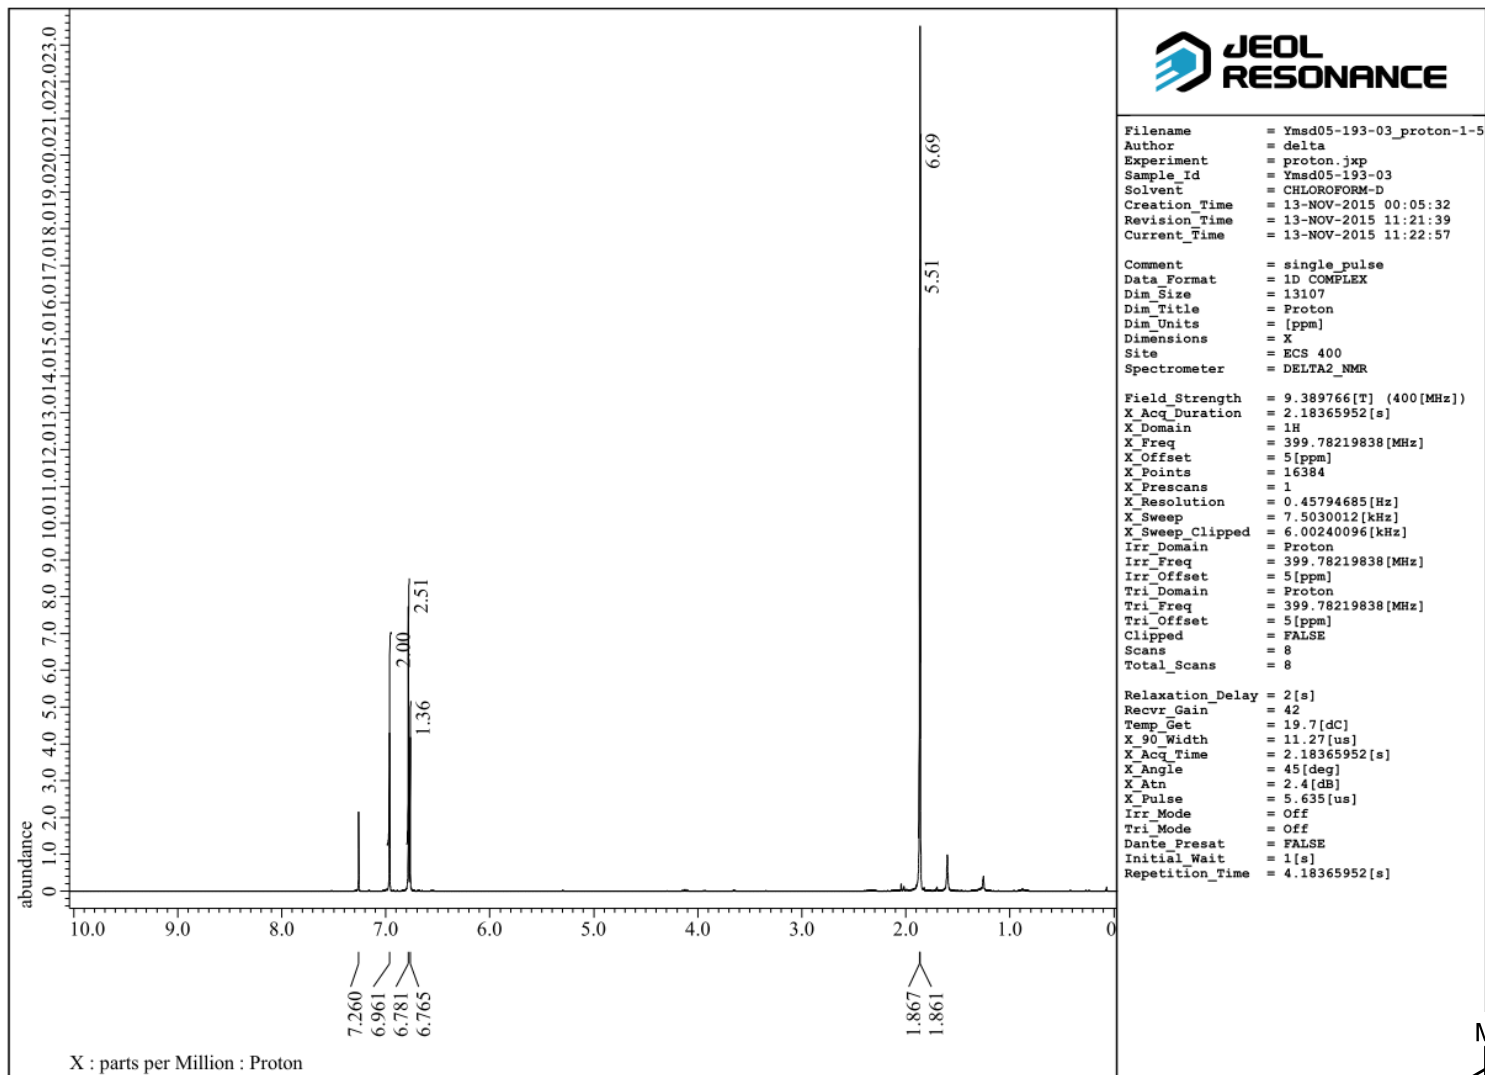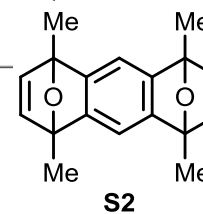

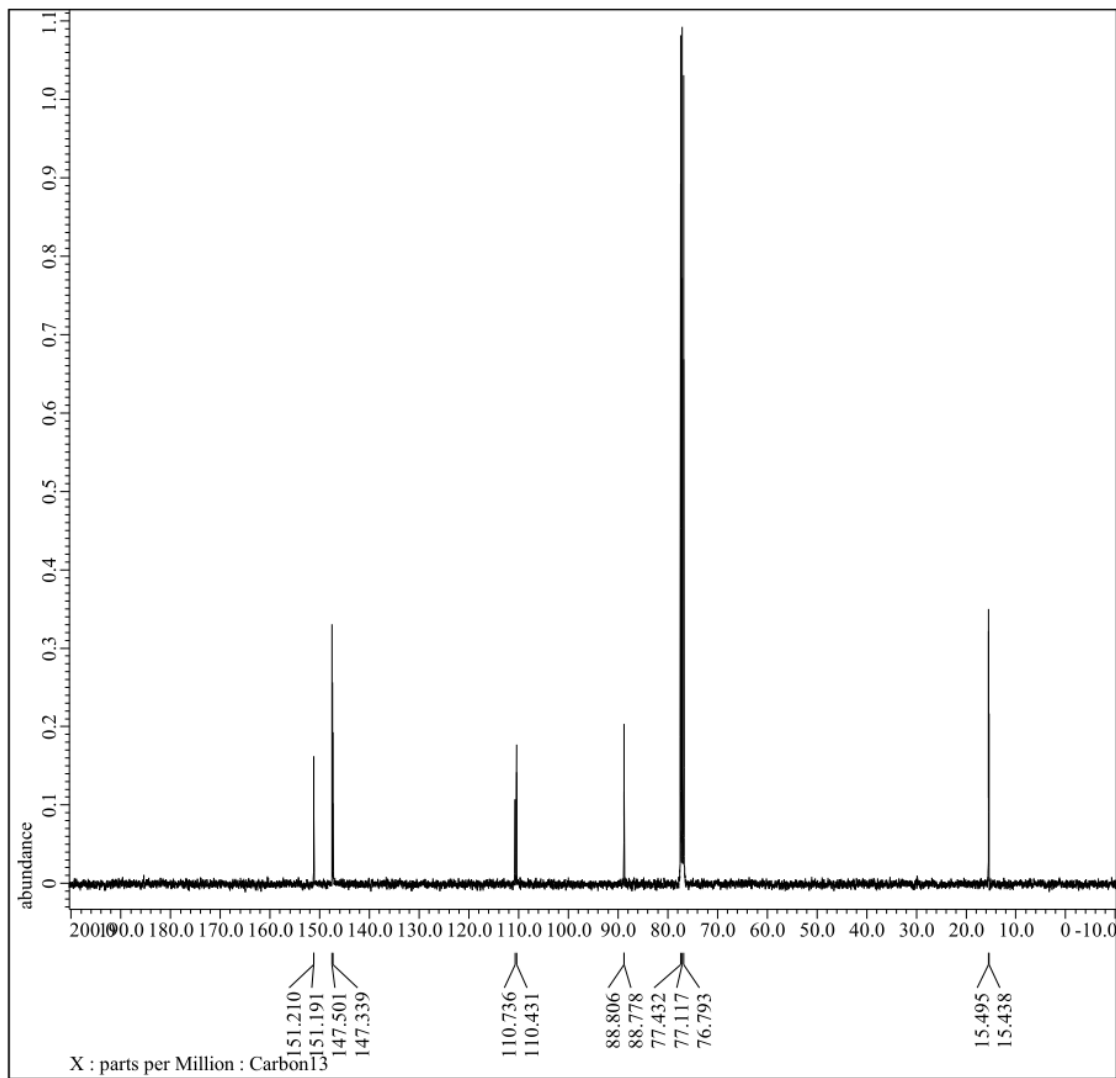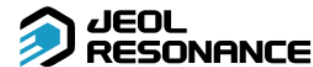

```

Filename      = Ymsd05-193-03_carbon-1-5
Author       = delta
Experiment   = carbon_jxp
Sample_id    = Ymsd05-193-03
Solvent      = CHLOROFORM-D
Creation Time = 13-NOV-2015 00:09:37
Revision Time = 13-NOV-2015 11:25:04
Current Time  = 13-NOV-2015 11:25:47

Comment      = single pulse decoupled g
Data Format   = 1D COMPLEX
Dim Size     = 26214
Dim Title    = Carbon13
Dim Units    = [ppm]
Dimensions   = X
Site         = ECS 400
Spectrometer = DELTA2_NMR

Field Strength = 9.389766[T] (400[MHz])
X_Acq_Duration = 1.04333312[s]
X_Domain      = 13C
X_Freq        = 100.52530333[MHz]
X_Offset      = 100[ppm]
X_Points      = 32768
X_Prescans    = 4
X_Resolution = 0.95846665[Hz]
X_Sweep       = 31.40703518[kHz]
X_Sweep_Clip  = 25.12562814[kHz]
Irr_Domain    = Proton
Irr_Freq      = 399.78219838[MHz]
Irr_Offset    = 5[ppm]
Clipped       = FALSE
Scans         = 597
Total_Scans   = 597

Relaxation_Delay = 2[s]
Recvr_Gain       = 60
Temp_Get         = 20.3[dC]
X_90_Width      = 9.15[us]
X_Acq_Time      = 1.04333312[s]
X_Angle         = 30[deg]
X_Atn           = 4[dB]
X_Pulse         = 3.05[us]
Irr_Atn_Dec     = 22.57[dB]
Irr_Atn_Noise  = 22.57[dB]
Irr_Noise       = WALTZ
Irr_Pwidth      = 0.115[ms]
Decoupling      = TRUE
Initial_Wait    = 1[s]
Noe              = TRUE
Noe_Time        = 2[s]
Repetition_Time = 3.04333312[s]

```

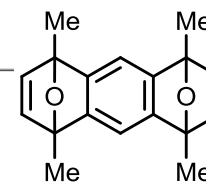

S2



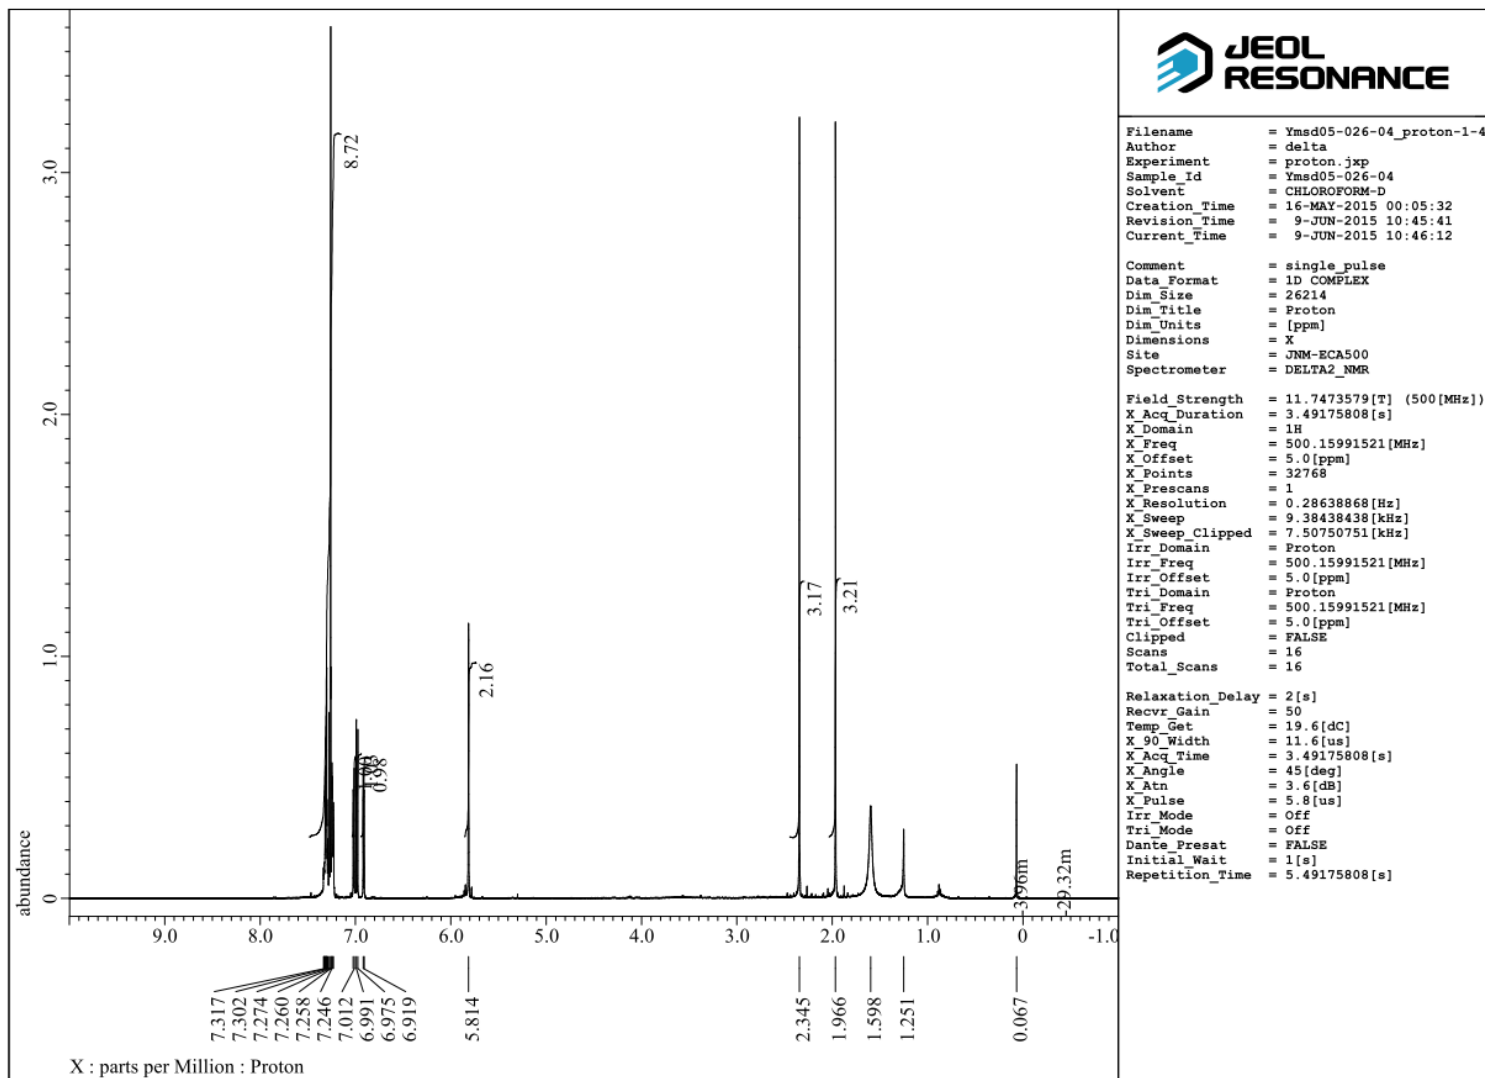

You created this PDF from an application that is not licensed to print to novaPDF printer (<http://www.novapdf.com>)

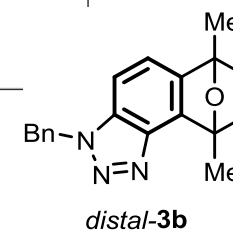

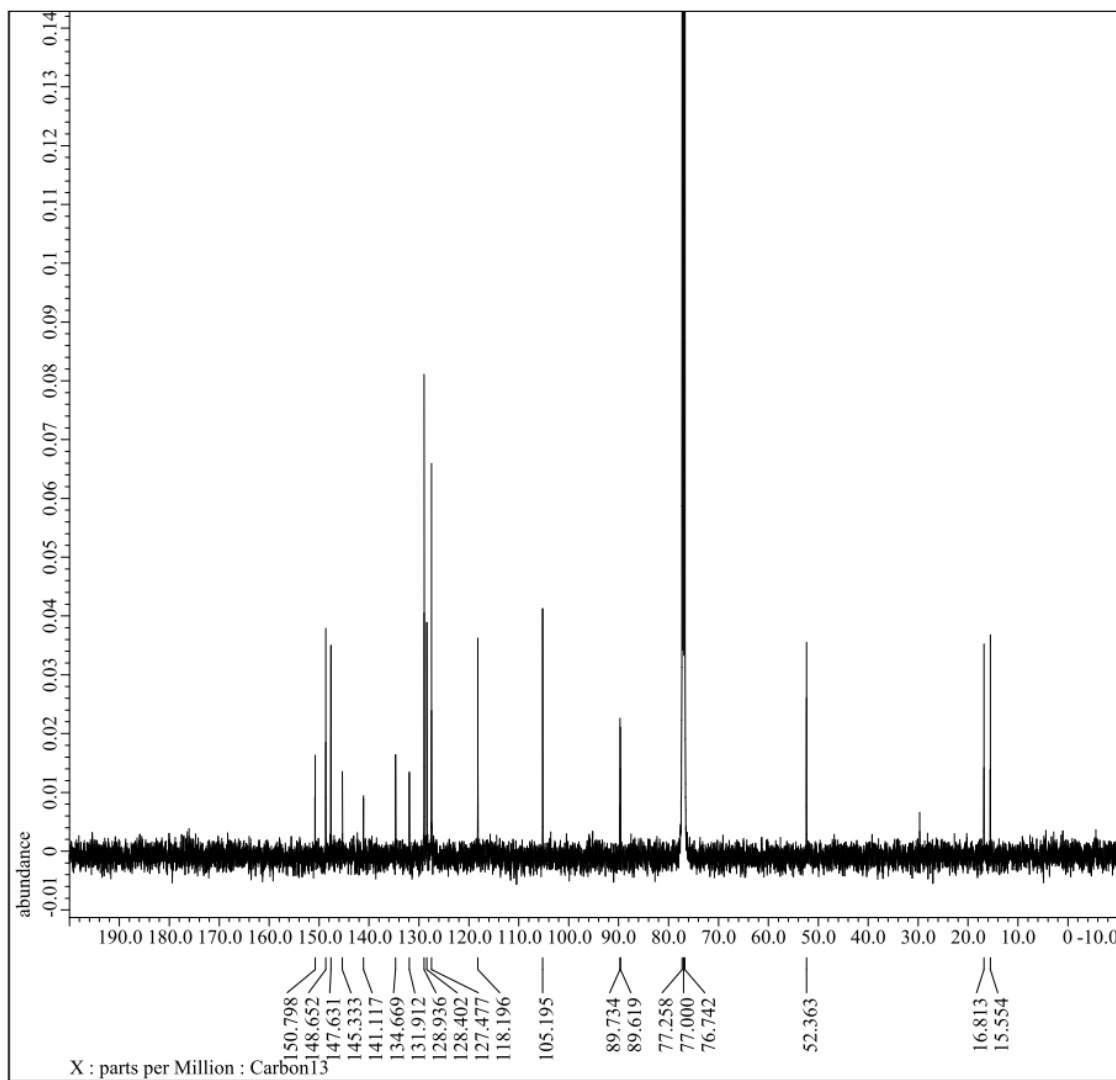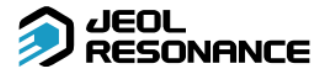

```

Filename      = Ymsd05-026-04_Carbon-1-4
Author       = delta
Experiment   = carbon_jxp
Sample_Id    = Ymsd05-026-04
Solvent      = CHLOROFORM-D
Creation_Time = 16-MAY-2015 05:03:44
Revision_Time = 29-MAY-2015 17:34:07
Current_Time  = 29-MAY-2015 17:38:04

Comment      = single pulse decoupled g
Data Format   = 1D COMPLEX
Dim Size     = 26214
Dim Title    = Carbon13
Dim Units    = [ppm]
Dimensions   = X
Site         = JNM-ECA500
Spectrometer = DELTA2_NMR

Field_Strength = 11.7473579[T] (500[MHz])
X_Acq_Duration = 0.83361792[s]
X_Domain      = 13C
X_Freq        = 125.76529768[MHz]
X_Offset      = 100[ppm]
X_Points      = 32768
X_Prescans    = 4
X_Resolution  = 1.19959034 [Hz]
X_Sweep       = 39.3081761 [kHz]
X_Sweep_Clipped = 31.44654088 [kHz]
Irr_Domain    = Proton
Irr_Freq      = 500.15991521[MHz]
Irr_Offset    = 5.0[ppm]
Clipped       = FALSE
Scans         = 4096
Total_Scans   = 4096

Relaxation_Delay = 2[s]
Recvr_Gain       = 60
Temp_Get         = 19.7[dC]
X_90_Width      = 9.6[us]
X_Acq_Time      = 0.83361792[s]
X_Angle         = 30[deg]
X_Atn           = 4.1[dB]
X_Pulse         = 3.2[us]
Irr_Atn_Dec     = 21.587[dB]
Irr_Atn_Noise  = 21.587[dB]
Irr_Noise       = WALTZ
Irr_Width       = 92[us]
Decoupling      = TRUE
Initial_Wait    = 1[s]
Noe              = TRUE
Noe_Time        = 2[s]
Repetition_Time = 2.83361792[s]
  
```

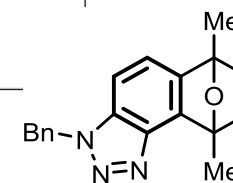

*distal-3b*

You created this PDF from an application that is not licensed to print to novaPDF printer (<http://www.novapdf.com>)

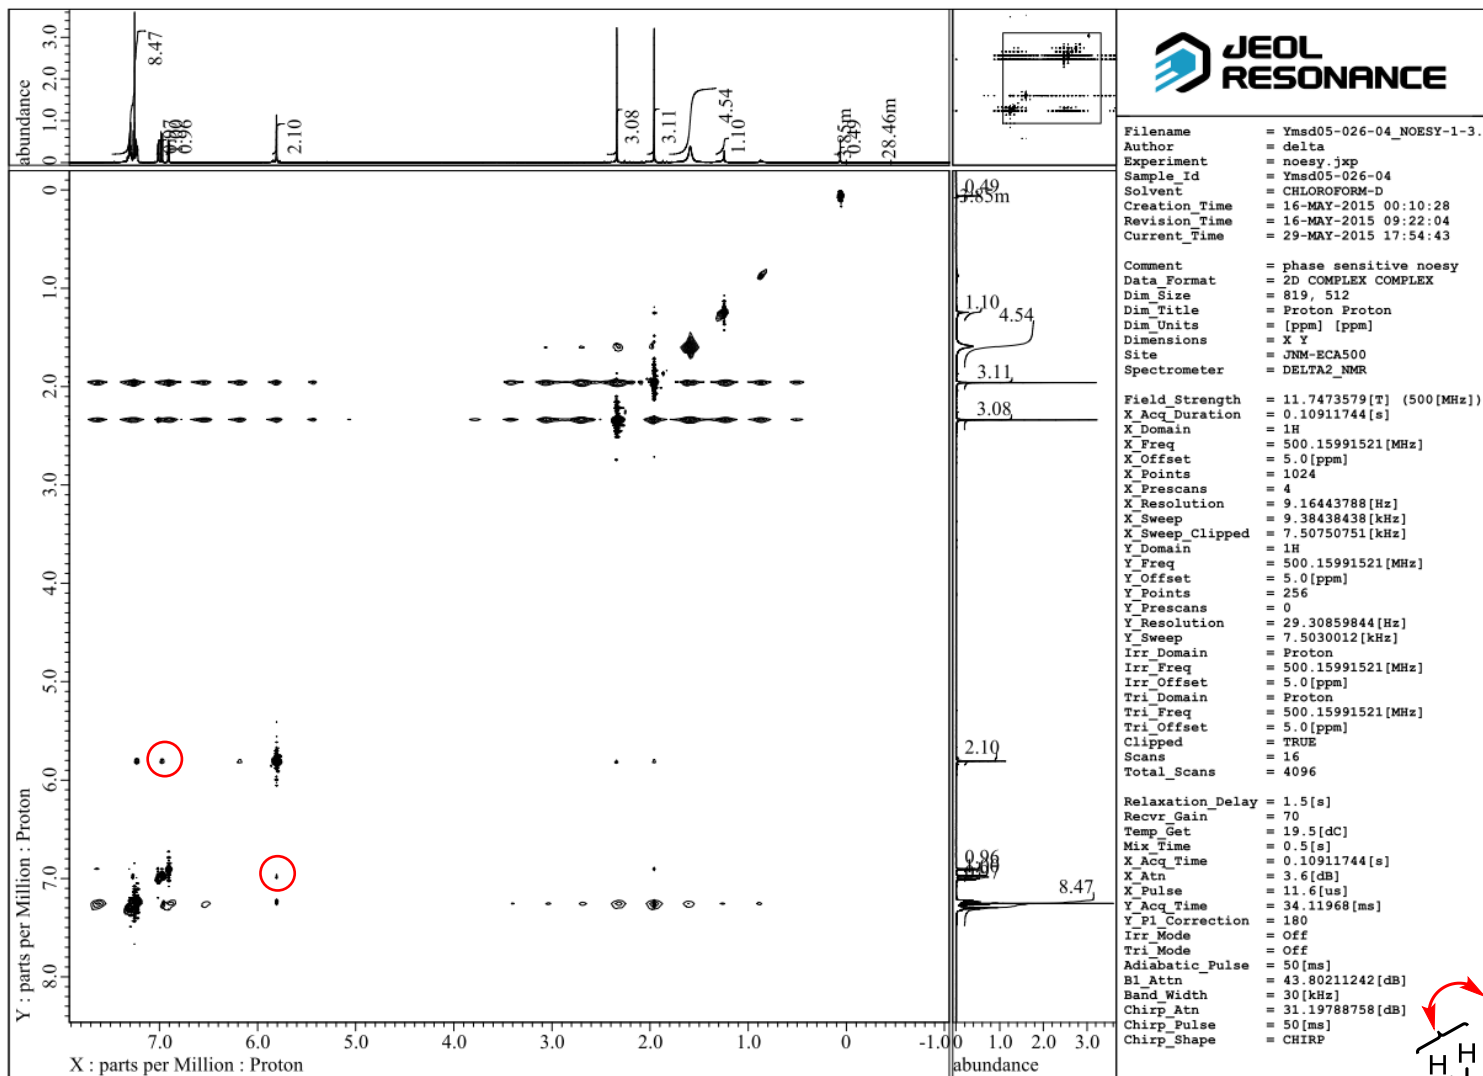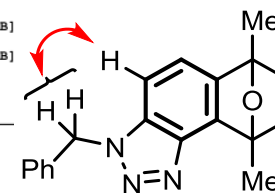

distal-3b

You created this PDF from an application that is not licensed to print to novaPDF printer (<http://www.novapdf.com>)

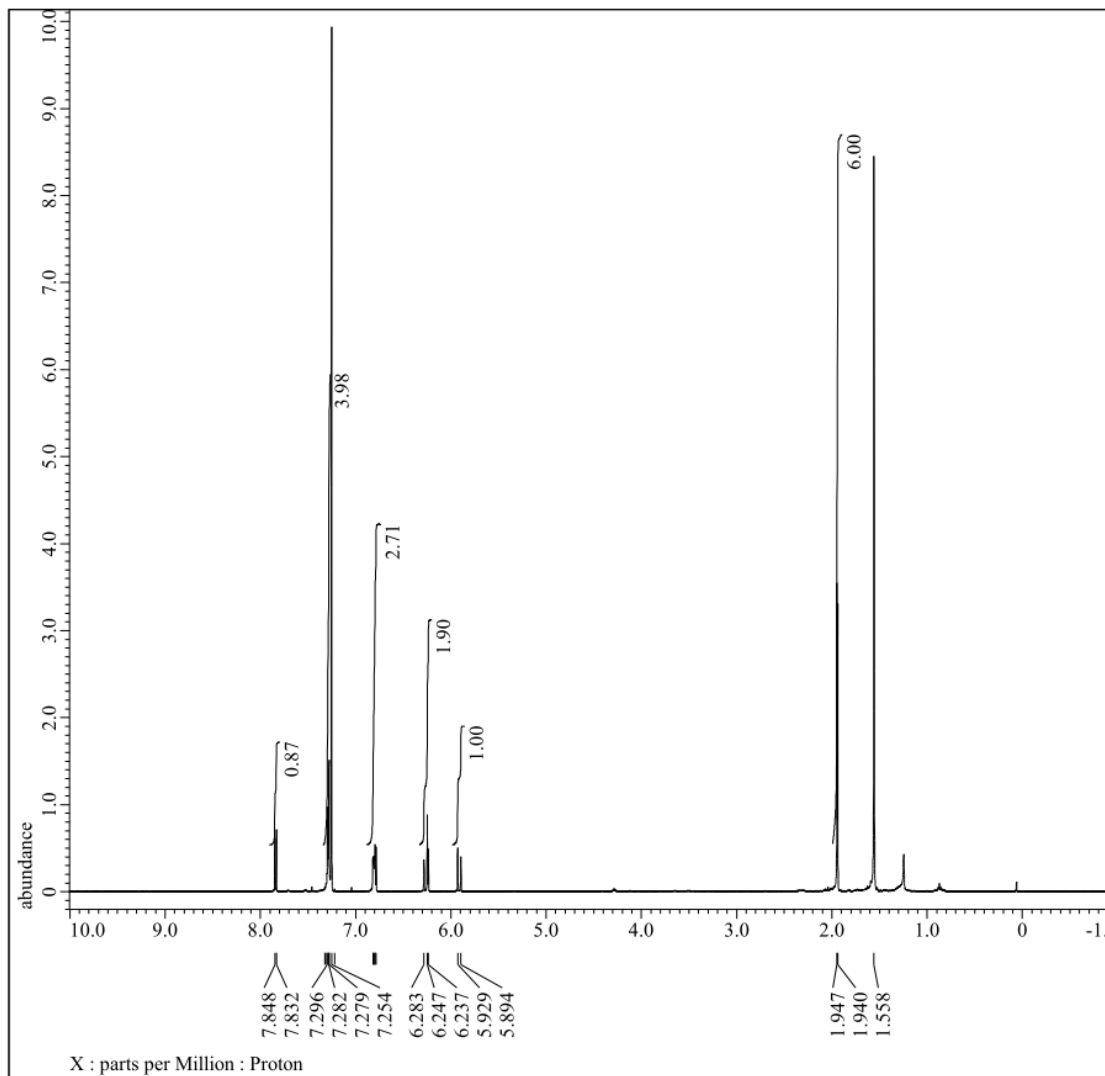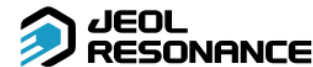

```

Filename      = Ymsd05-166-05minor_prot
Author       = delta
Experiment   = proton.jxp
Sample_Id    = Ymsd05-166-05minor
Solvent      = CHLOROFORM-D
Creation_Time = 22-OCT-2015 00:12:17
Revision_Time = 2-NOV-2015 16:29:29
Current_Time  = 2-NOV-2015 16:30:00

Comment      = single pulse
Data Format   = 1D COMPLEX
Dim Size     = 13107
Dim Title    = Proton
Dim Units    = [ppm]
Dimensions   = X
Site         = JNM-ECA500
Spectrometer = DELTA2_NMR

Field Strength = 11.7473579[T] (500[MHz])
X_Acq_Duration = 1.74587904[s]
X_Domain      = 1H
X_Freq        = 500.15991521[MHz]
X_Offset      = 5.0[ppm]
X_Points      = 16384
X_Prescans    = 1
X_Resolution  = 0.57277737[Hz]
X_Sweep       = 9.38438438[kHz]
X_Sweep_Clipped = 7.50750751[kHz]
Irr_Domain    = Proton
Irr_Freq      = 500.15991521[MHz]
Irr_Offset    = 5.0[ppm]
Tri_Domain    = Proton
Tri_Freq      = 500.15991521[MHz]
Tri_Offset    = 5.0[ppm]
Clipped       = FALSE
Scans         = 16
Total_Scans   = 16

Relaxation_Delay = 2[s]
Recvr_Gain       = 54
Temp_Get        = 20.5[dC]
X_90_Width      = 11.6[us]
X_Acq_Time      = 1.74587904[s]
X_Angle         = 45[deg]
X_Atn           = 3.6[dB]
X_Pulse         = 5.8[us]
Irr_Mode        = Off
Tri_Mode        = Off
Dante_Presat    = FALSE
Initial_Wait    = 1[s]
Repetition_Time = 3.74587904[s]
  
```

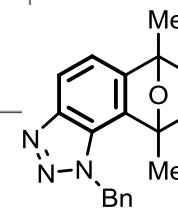

proximal-3b

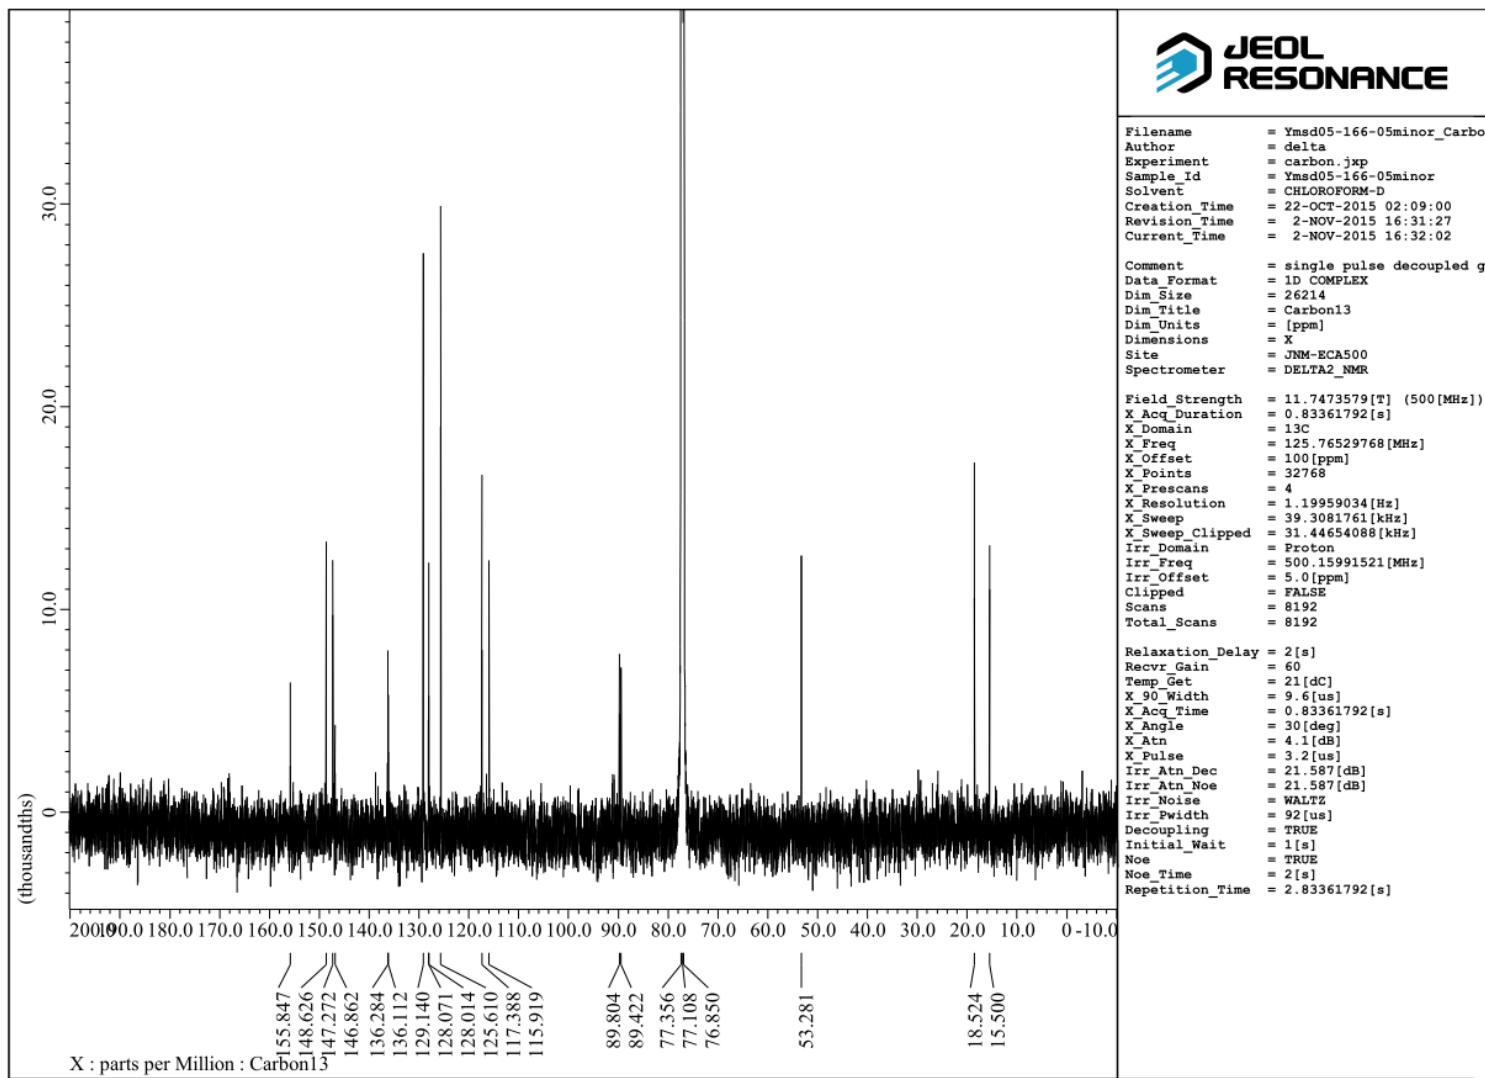

You created this PDF from an application that is not licensed to print to novaPDF printer (<http://www.novapdf.com>)

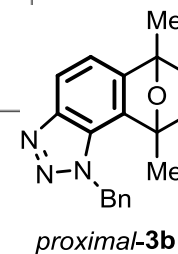

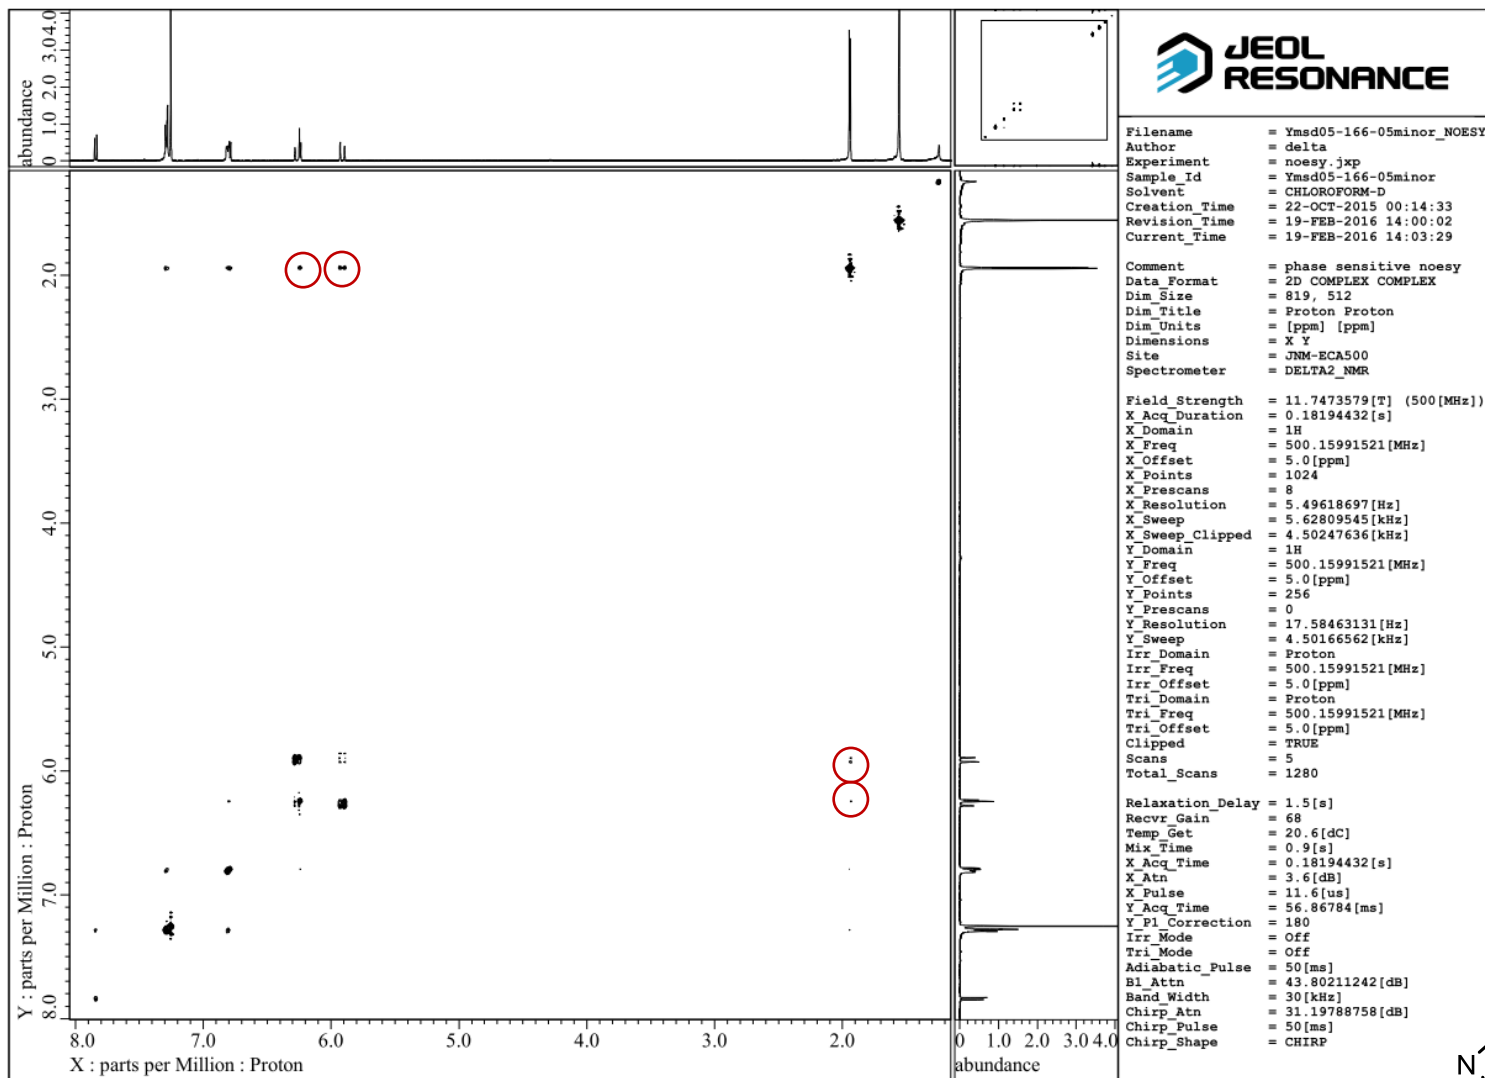

You created this PDF from an application that is not licensed to print to novaPDF printer (<http://www.novapdf.com>)

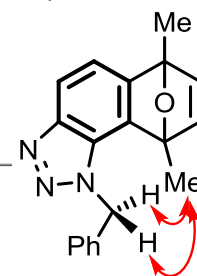

proximal-3b

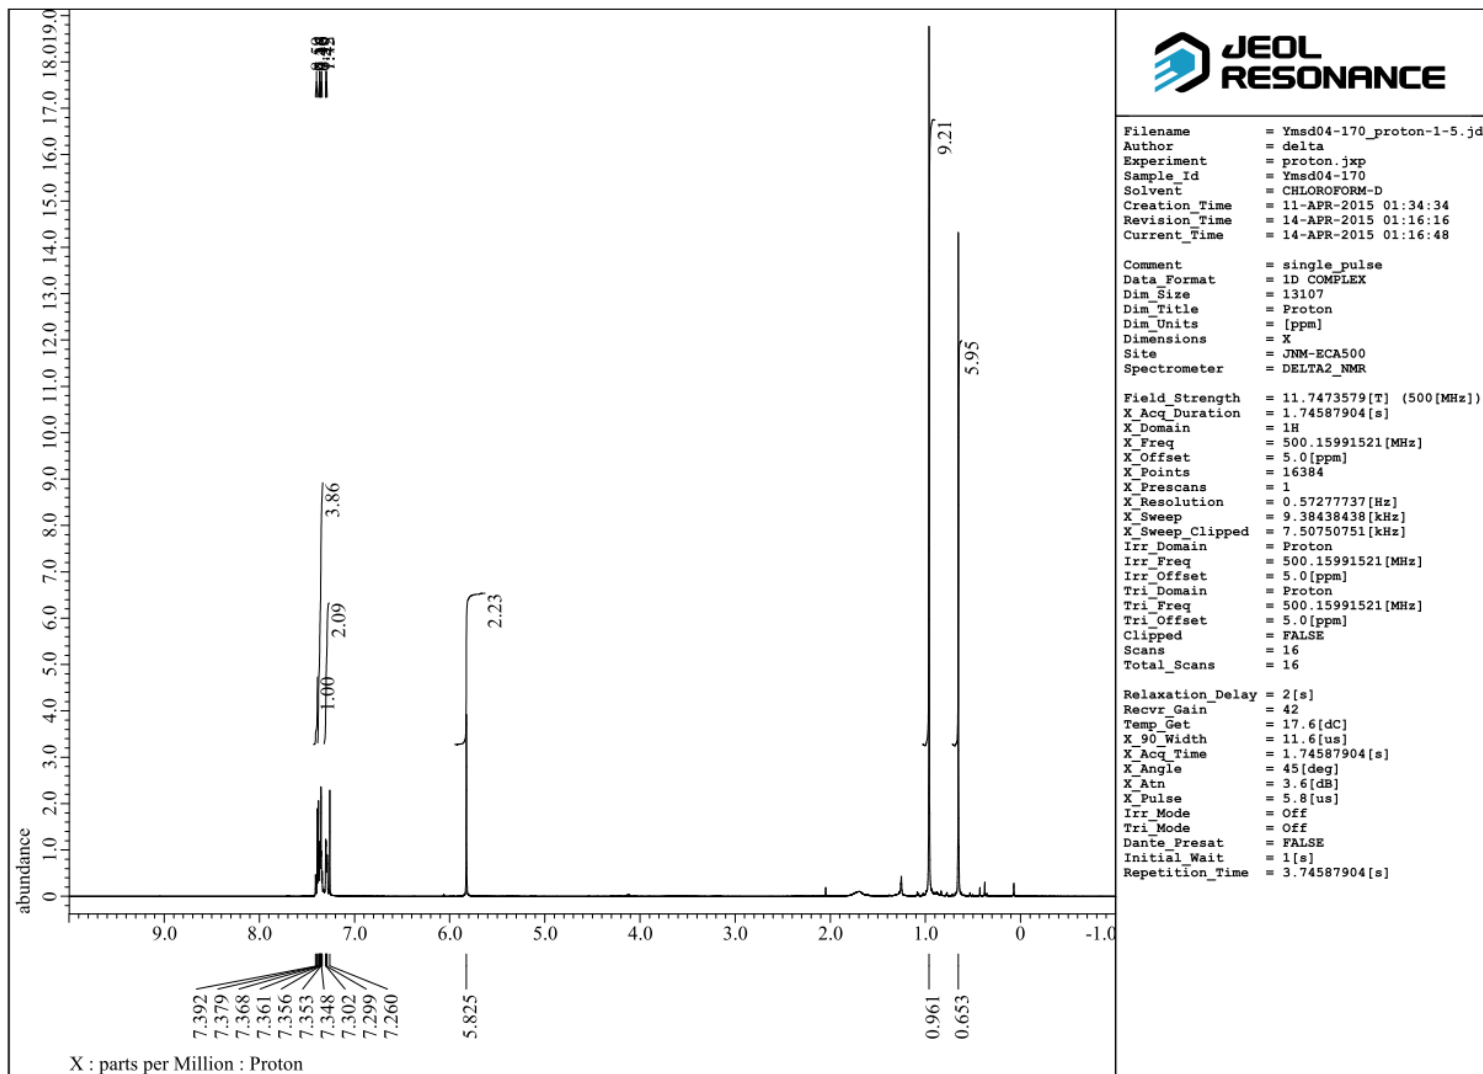

You created this PDF from an application that is not licensed to print to novaPDF printer (<http://www.novapdf.com>)

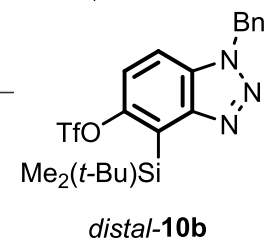

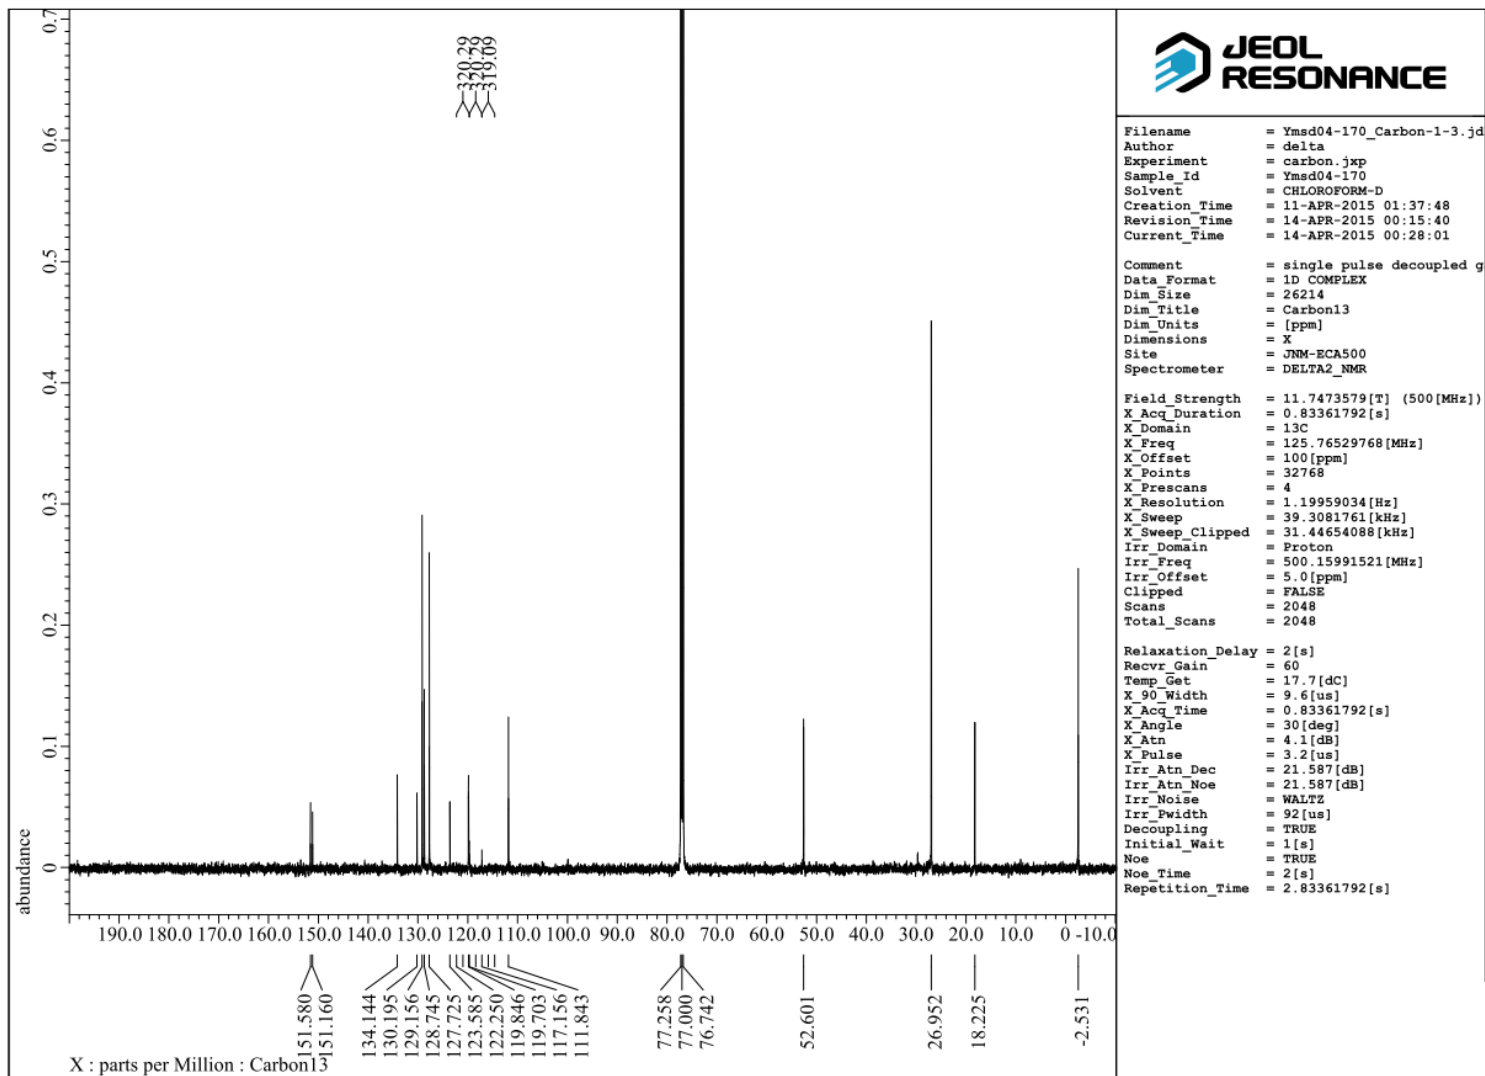

You created this PDF from an application that is not licensed to print to novaPDF printer (<http://www.novapdf.com>)

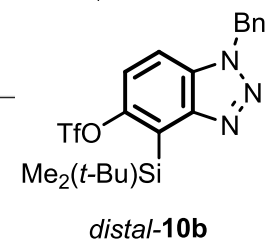



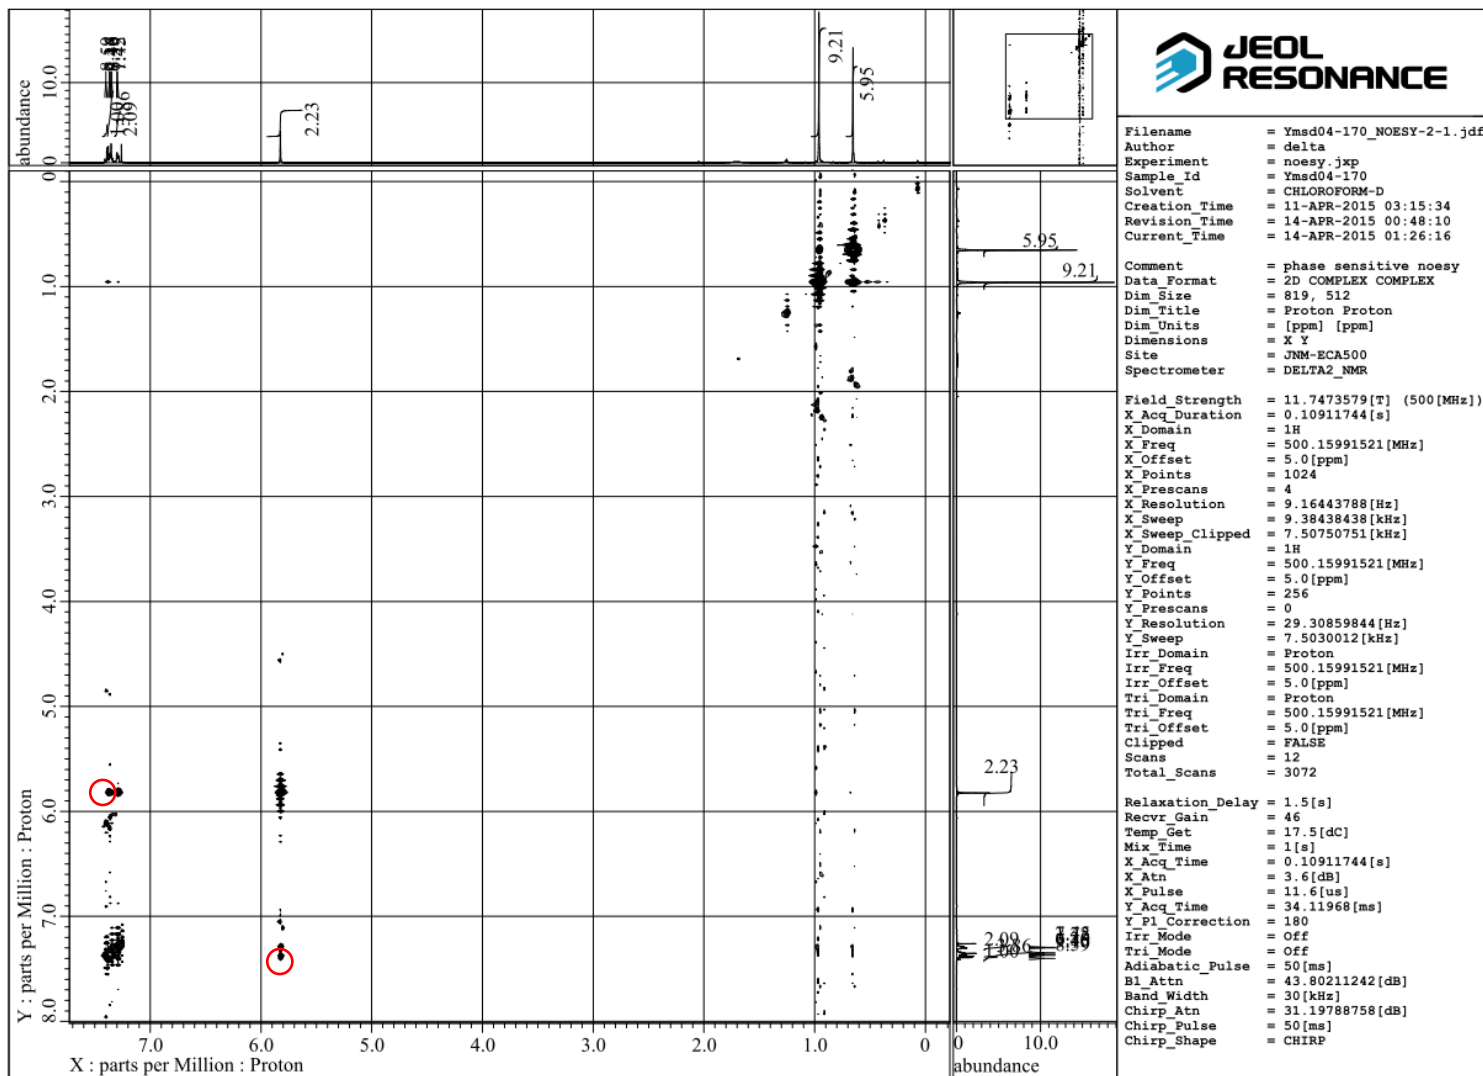

You created this PDF from an application that is not licensed to print to novaPDF printer (<http://www.novapdf.com>)

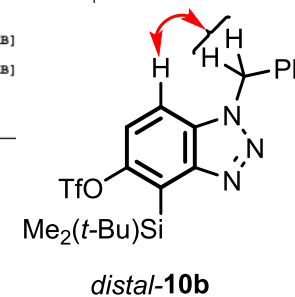

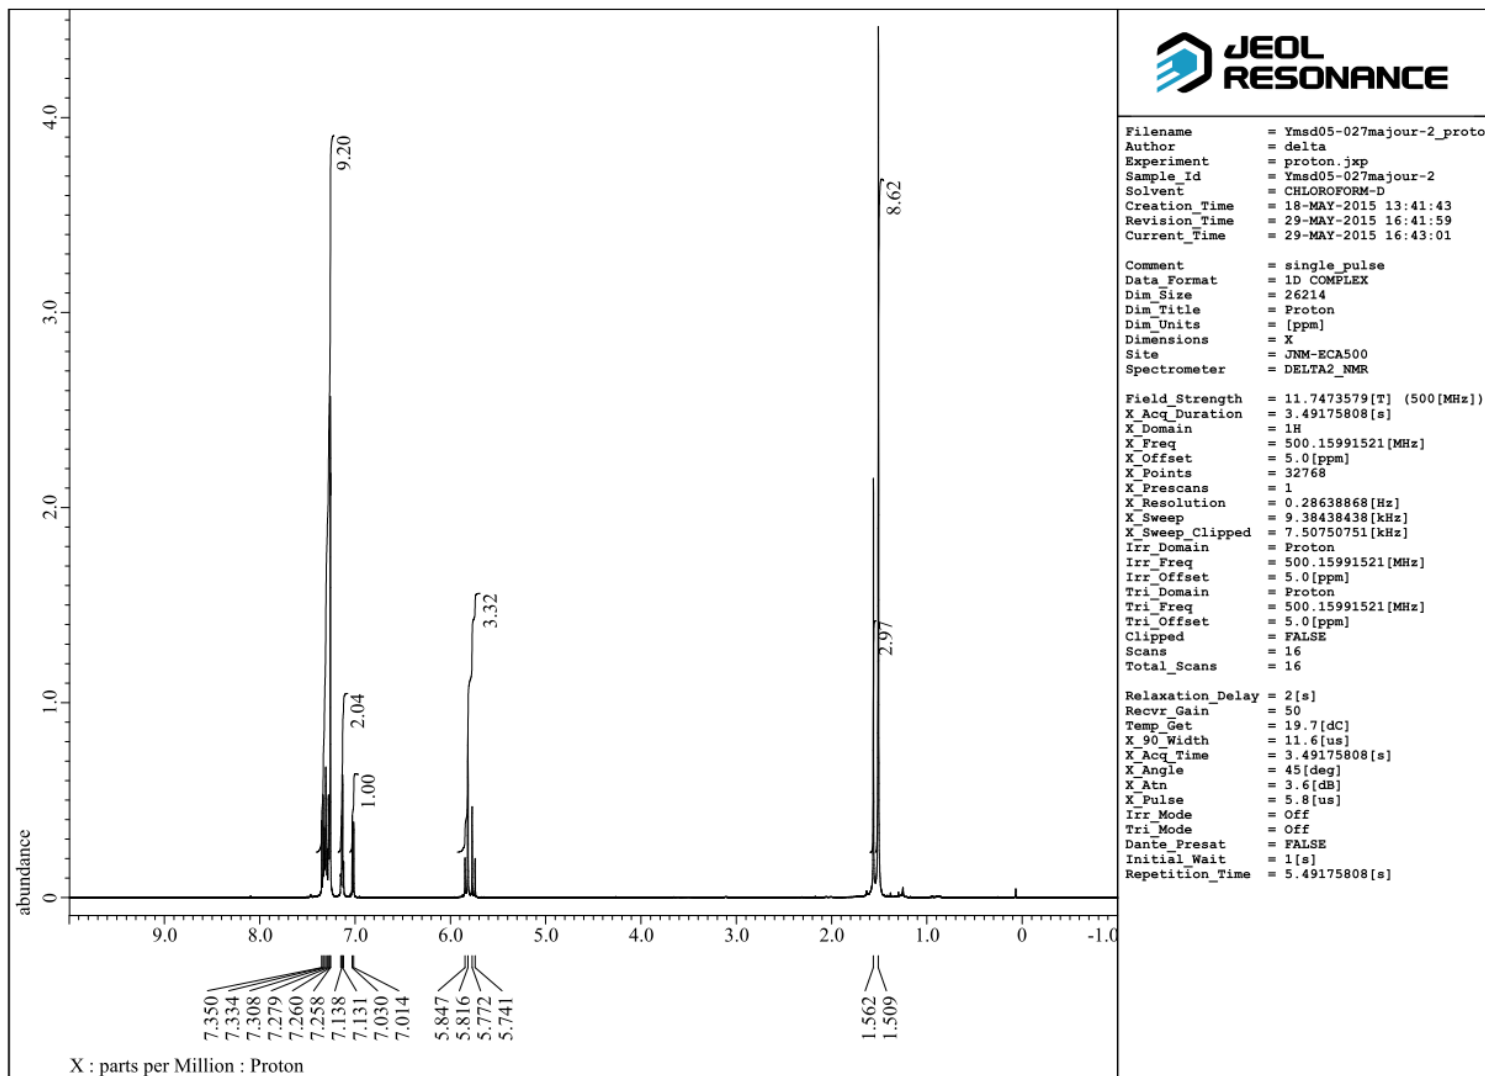

You created this PDF from an application that is not licensed to print to novaPDF printer (<http://www.novapdf.com>)

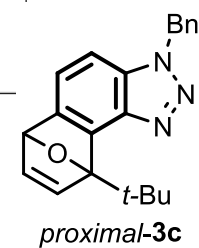

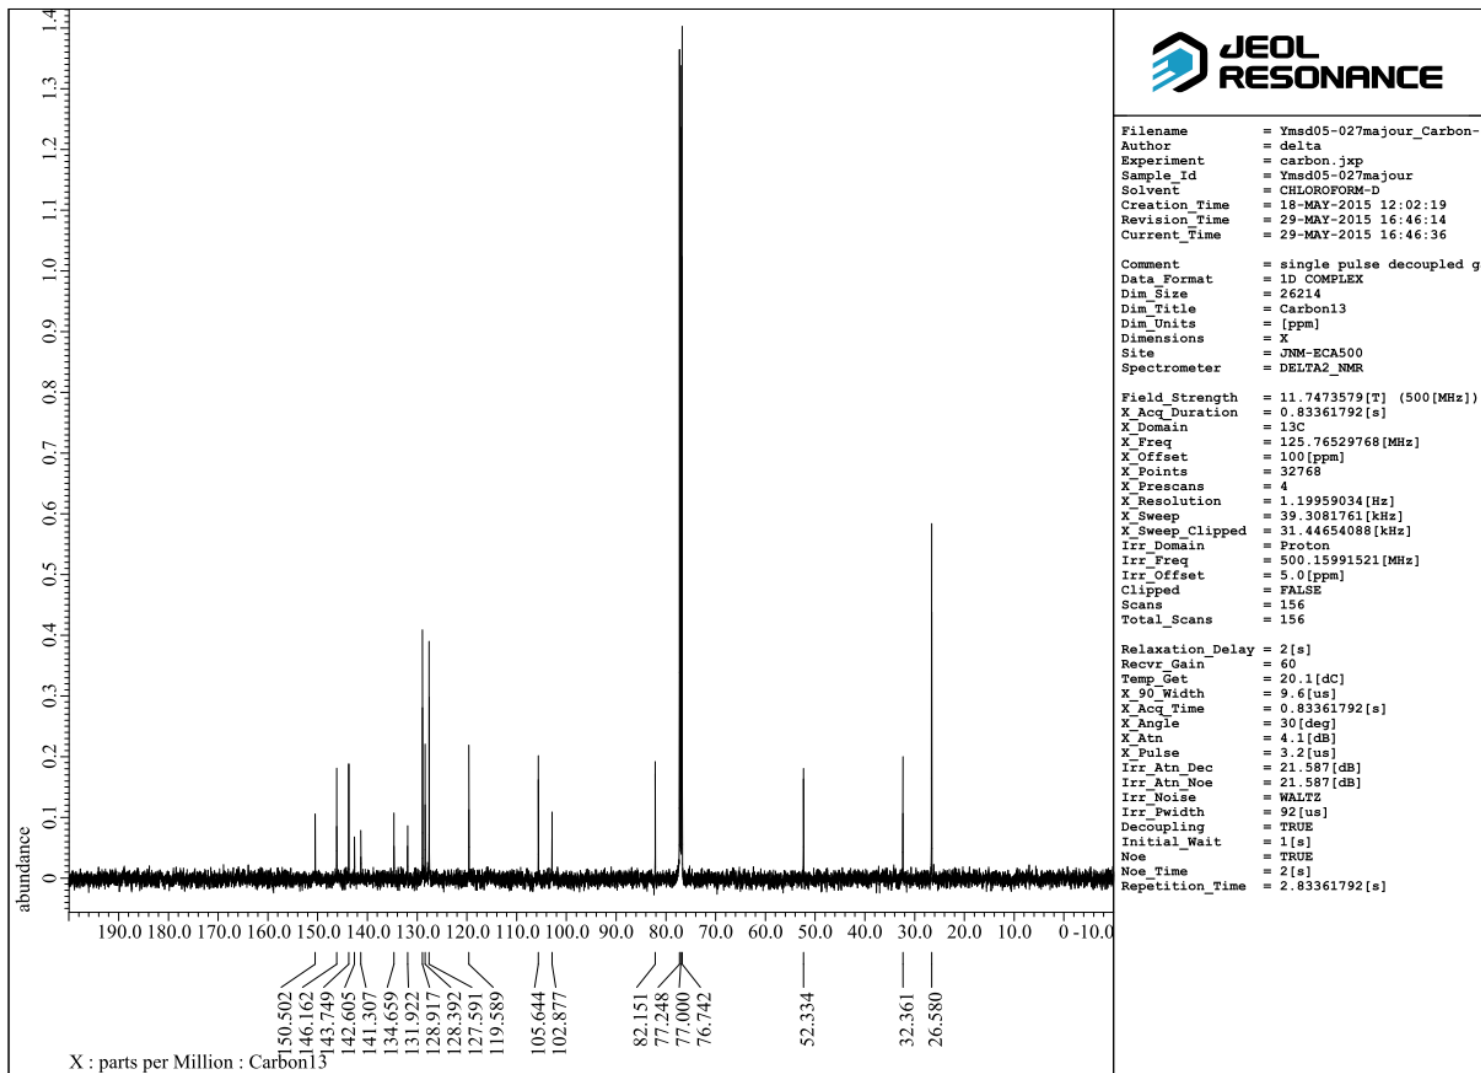

You created this PDF from an application that is not licensed to print to novaPDF printer (<http://www.novapdf.com>)

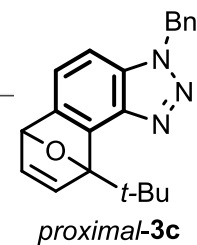

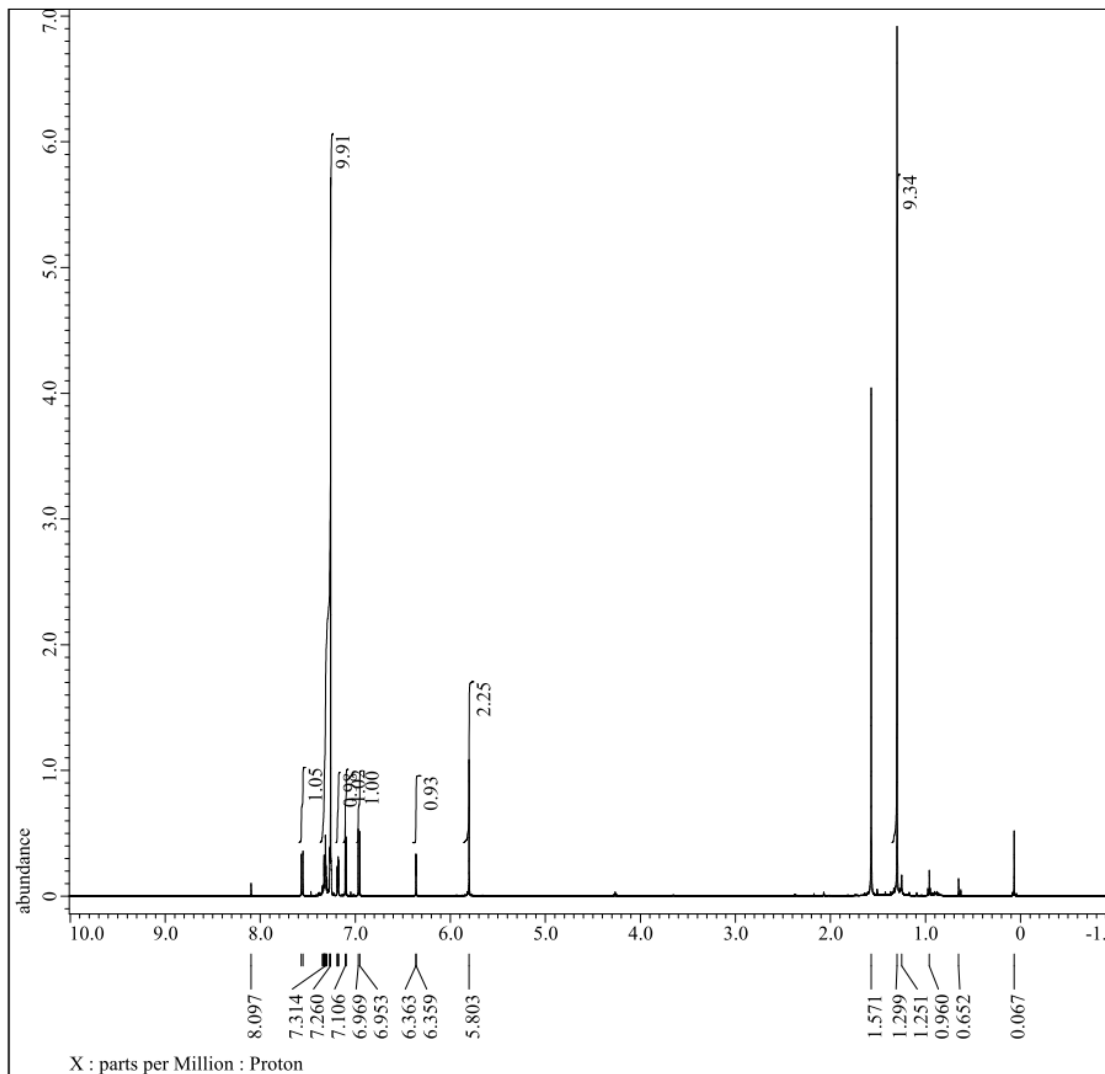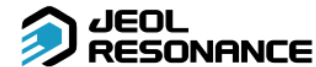

```

Filename      = Ymsd05-027-minor_proton-
Author       = delta
Experiment   = proton_jxp
Sample Id    = Ymsd05-027-minor
Solvent      = CHLOROFORM-D
Creation_Time = 20-MAY-2015 00:06:01
Revision_Time = 29-MAY-2015 11:49:36
Current_Time  = 29-MAY-2015 11:50:55

Comment      = single_pulse
Data Format   = 1D COMPLEX
Dim Size     = 26214
Dim Title    = Proton
Dim Units    = [ppm]
Dimensions   = X
Site         = JNM-ECA500
Spectrometer = DELTA2_NMR

Field_Strength = 11.7473579[T] (500[MHz])
X_Acq_Duration = 3.49175808[s]
X_Domain      = 1H
X_Freq        = 500.15991521[MHz]
X_Offset      = 5.0[ppm]
X Points      = 32768
X_Prescans    = 1
X_Resolution  = 0.28638868 [Hz]
X_Sweep       = 9.38438438 [kHz]
X_Sweep_Clipped = 7.50750751 [kHz]
Irr_Domain    = Proton
Irr_Freq      = 500.15991521[MHz]
Irr_Offset    = 5.0[ppm]
Tri_Domain    = Proton
Tri_Freq      = 500.15991521[MHz]
Tri_Offset    = 5.0[ppm]
Clipped       = FALSE
Scans         = 8
Total_Scans   = 8

Relaxation_Delay = 2[s]
Recvr_Gain       = 50
Temp_Get         = 18.9[dC]
X_90_Width      = 11.6[us]
X_Acq_Time      = 3.49175808[s]
X_Angle         = 45[deg]
X_Atn           = 3.6[db]
X_Pulse         = 5.8[us]
Irr_Mode        = Off
Tri_Mode        = Off
Dante_Presat    = FALSE
Initial_Wait    = 1[s]
Repetition_Time = 5.49175808[s]

```

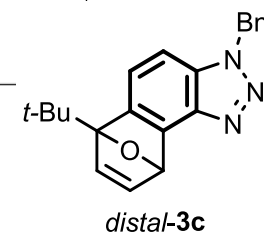

You created this PDF from an application that is not licensed to print to novaPDF printer (<http://www.novapdf.com>)

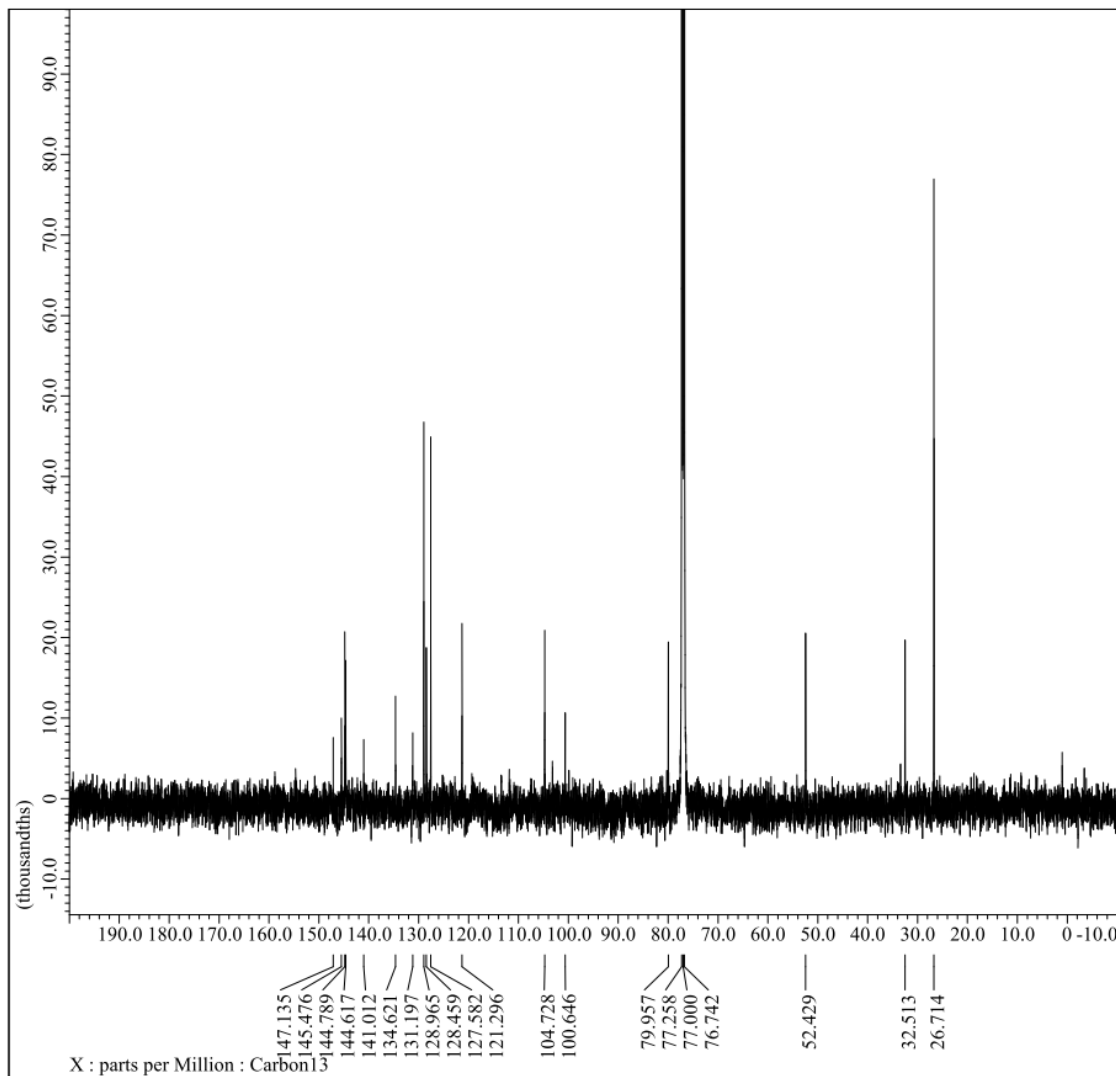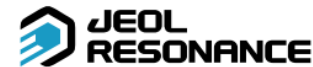

```

Filename      = Ymsd05-027-minor_Carbon-
Author       = delta
Experiment    = carbon_jxp
Sample_Id     = Ymsd05-027-minor
Solvent       = CHLOROFORM-D
Creation_Time = 20-MAY-2015 00:11:11
Revision_Time = 29-MAY-2015 11:57:42
Current_Time  = 29-MAY-2015 12:44:11

Comment      = single pulse decoupled g
Data Format   = 1D COMPLEX
Dim_Size     = 26214
Dim_Title    = Carbon13
Dim_Units    = [ppm]
Dimensions   = X
Site         = JNM-ECA500
Spectrometer = DELTA2_NMR

Field_Strength = 11.7473579[T] (500[MHz])
X_Acq_Duration = 0.83361792[s]
X_Domain       = 13C
X_Freq         = 125.76529768[MHz]
X_Offset       = 100[ppm]
X_Points       = 32768
X_Prescans     = 4
X_Resolution   = 1.19959034 [Hz]
X_Sweep        = 39.3081761 [kHz]
X_Sweep_Clippped = 31.44654088 [kHz]
Irr_Domain     = Proton
Irr_Freq       = 500.15991521[MHz]
Irr_Offset     = 5.0[ppm]
Clipped        = FALSE
Scans          = 4096
Total_Scans    = 4096

Relaxation_Delay = 2[s]
Recvr_Gain       = 60
Temp_Get         = 19.6[dC]
X_90_Width      = 9.6[us]
X_Acq_Time       = 0.83361792[s]
X_Angle         = 30[deg]
X_Atn           = 4.1[dB]
X_Pulse         = 3.2[us]
Irr_Atn_Dec     = 21.587[dB]
Irr_Atn_No     = 21.587[dB]
Irr_Noise       = WALTZ
Irr_Pwidth      = 92[us]
Decoupling      = TRUE
Initial_Wait    = 1[s]
Noe              = TRUE
Noe_Time        = 2[s]
Repetition_Time = 2.83361792[s]
  
```

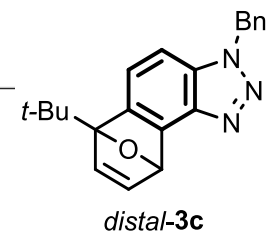

You created this PDF from an application that is not licensed to print to novaPDF printer (<http://www.novapdf.com>)

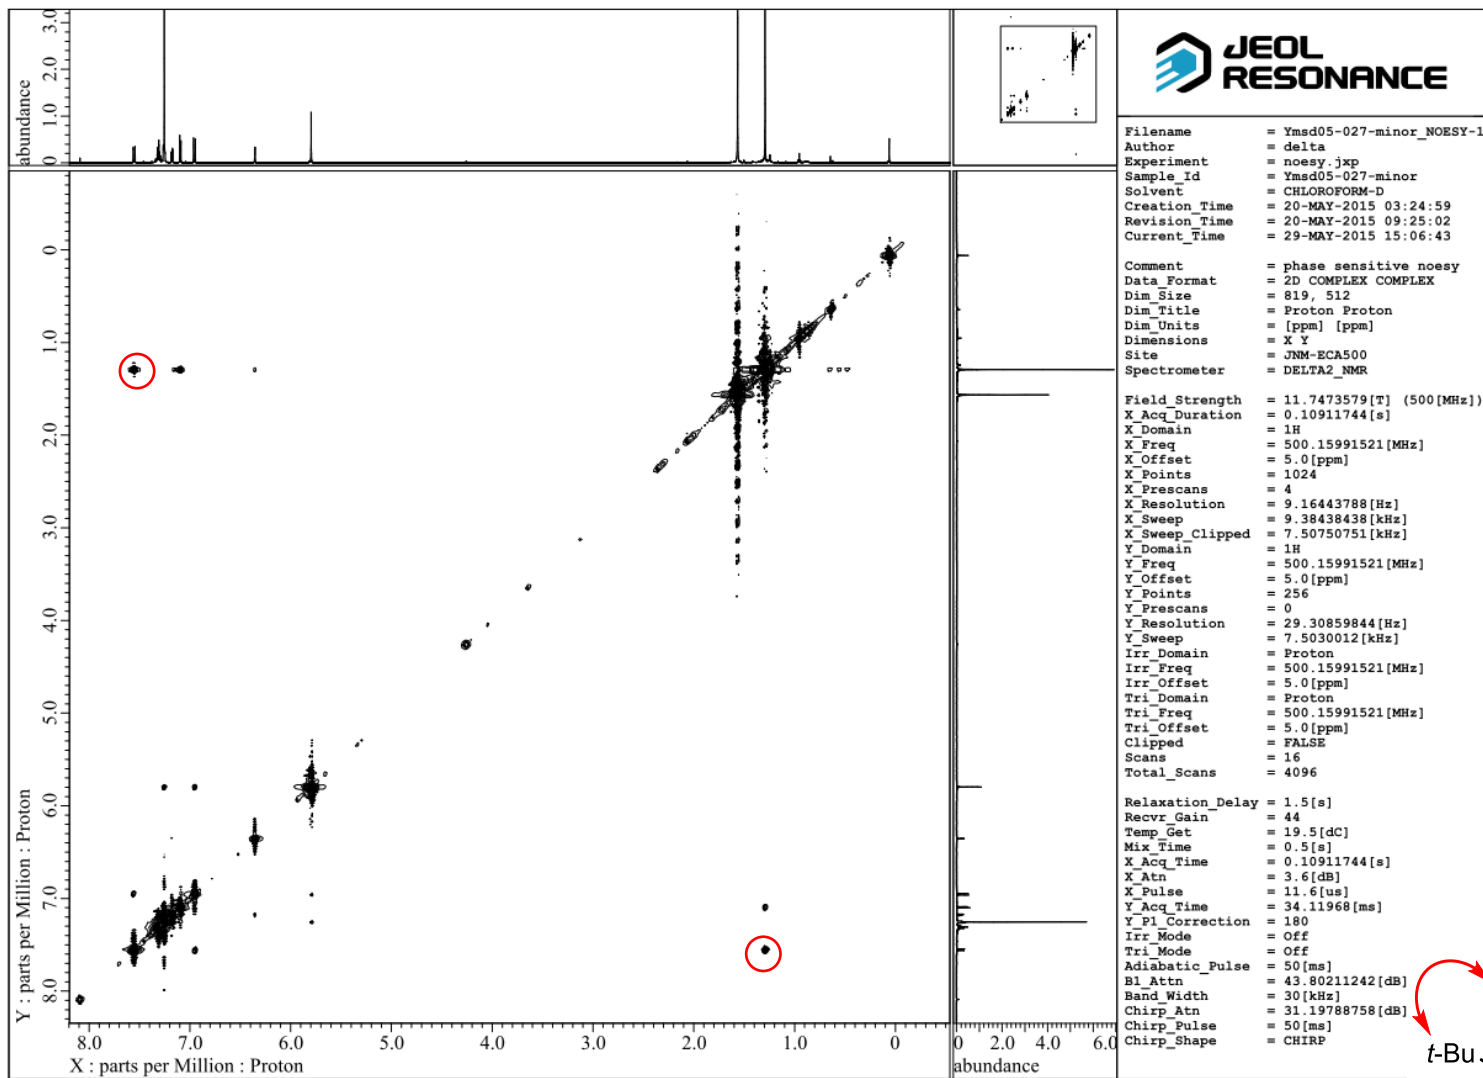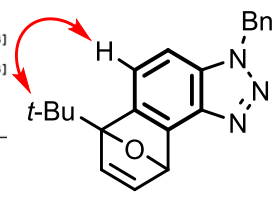

distal-3c

You created this PDF from an application that is not licensed to print to novaPDF printer (<http://www.novapdf.com>)

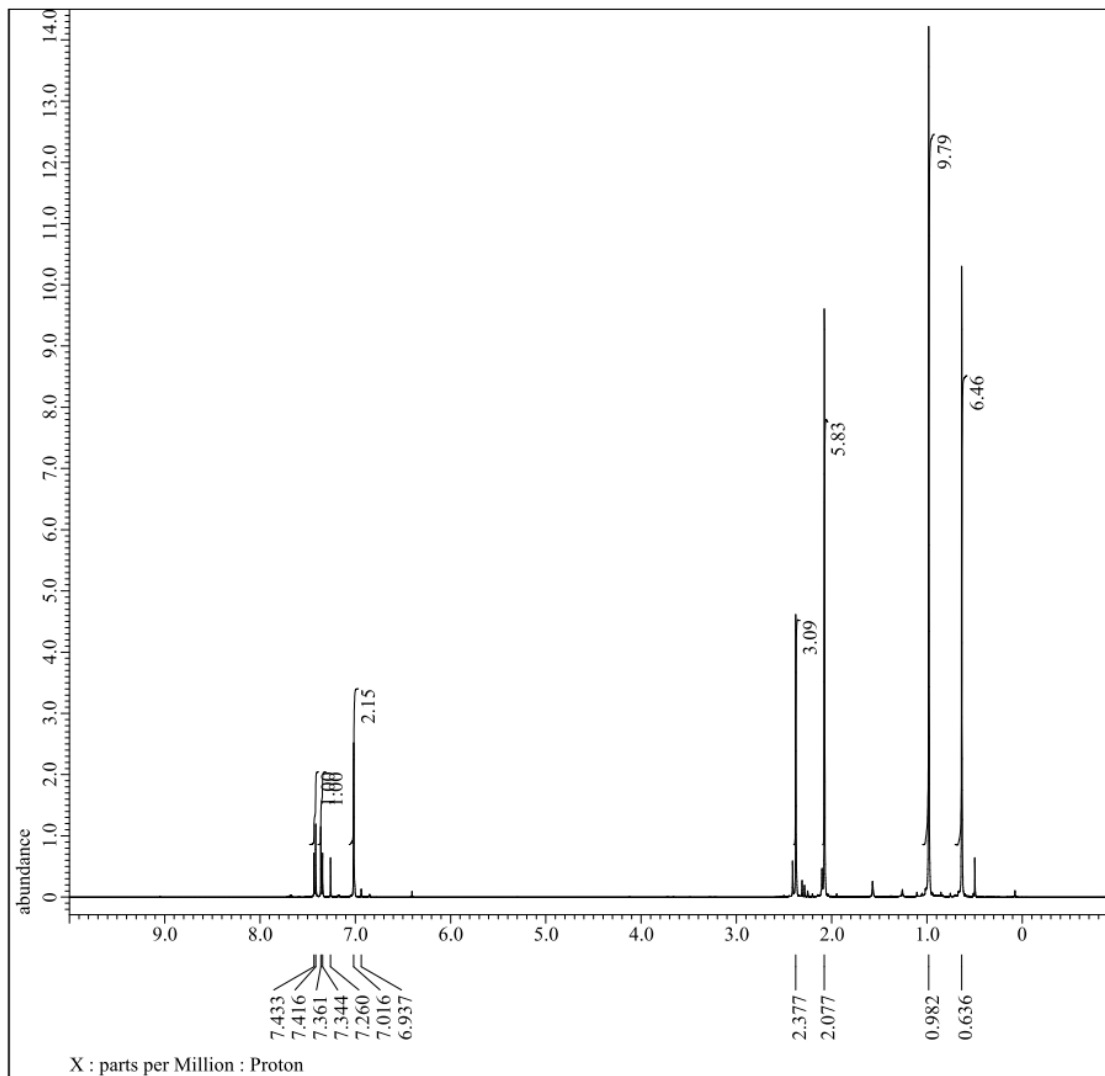

```

Filename      = Ymsd05-021-03_proton-1-3
Author       = delta
Experiment   = proton_jmp
Sample_Id    = Ymsd05-021-03
Solvent      = CHLOROFORM-D
Creation_Time = 9-MAY-2015 00:22:58
Revision_Time = 29-MAY-2015 09:43:01
Current_Time = 29-MAY-2015 09:44:29

Comment      = single pulse
Data Format   = 1D COMPLEX
Dim_Size     = 13107
Dim_Title    = Proton
Dim_Units    = [ppm]
Dimensions   = X
Site         = JNM-ECA500
Spectrometer = DELTA2_NMR

Field_Strength = 11.7473579[T] (500[MHz])
X_Acq_Duration = 1.74063616[s]
X_Domain       = 1H
X_Freq         = 500.15991521[MHz]
X_Offset       = 5.0[ppm]
X_Points      = 16384
X_Prescans    = 1
X_Resolution  = 0.5745026[Hz]
X_Sweep       = 9.4126506[kHz]
X_Sweep_Clip  = 7.53012048[kHz]
Irr_Domain    = Proton
Irr_Freq      = 500.15991521[MHz]
Irr_Offset    = 5.0[ppm]
Tri_Domain    = Proton
Tri_Freq      = 500.15991521[MHz]
Tri_Offset    = 5.0[ppm]
Clipped       = FALSE
Scans         = 8
Total_Scans   = 8

Relaxation_Delay = 2[s]
Recvr_Gain       = 36
Temp_Get        = 19.5[dC]
X_90_Width     = 11.6[us]
X_Acq_Time     = 1.74063616[s]
X_Angle        = 45[deg]
X_Atn          = 3.6[db]
X_Pulse        = 5.8[us]
Irr_Mode       = Off
Tri_Mode       = Off
Dante_Presat   = FALSE
Initial_Wait   = 1[s]
Repetition_Time = 3.74063616[s]
  
```

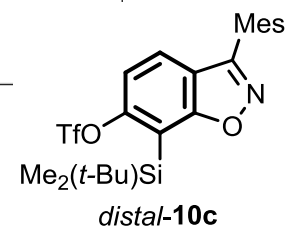

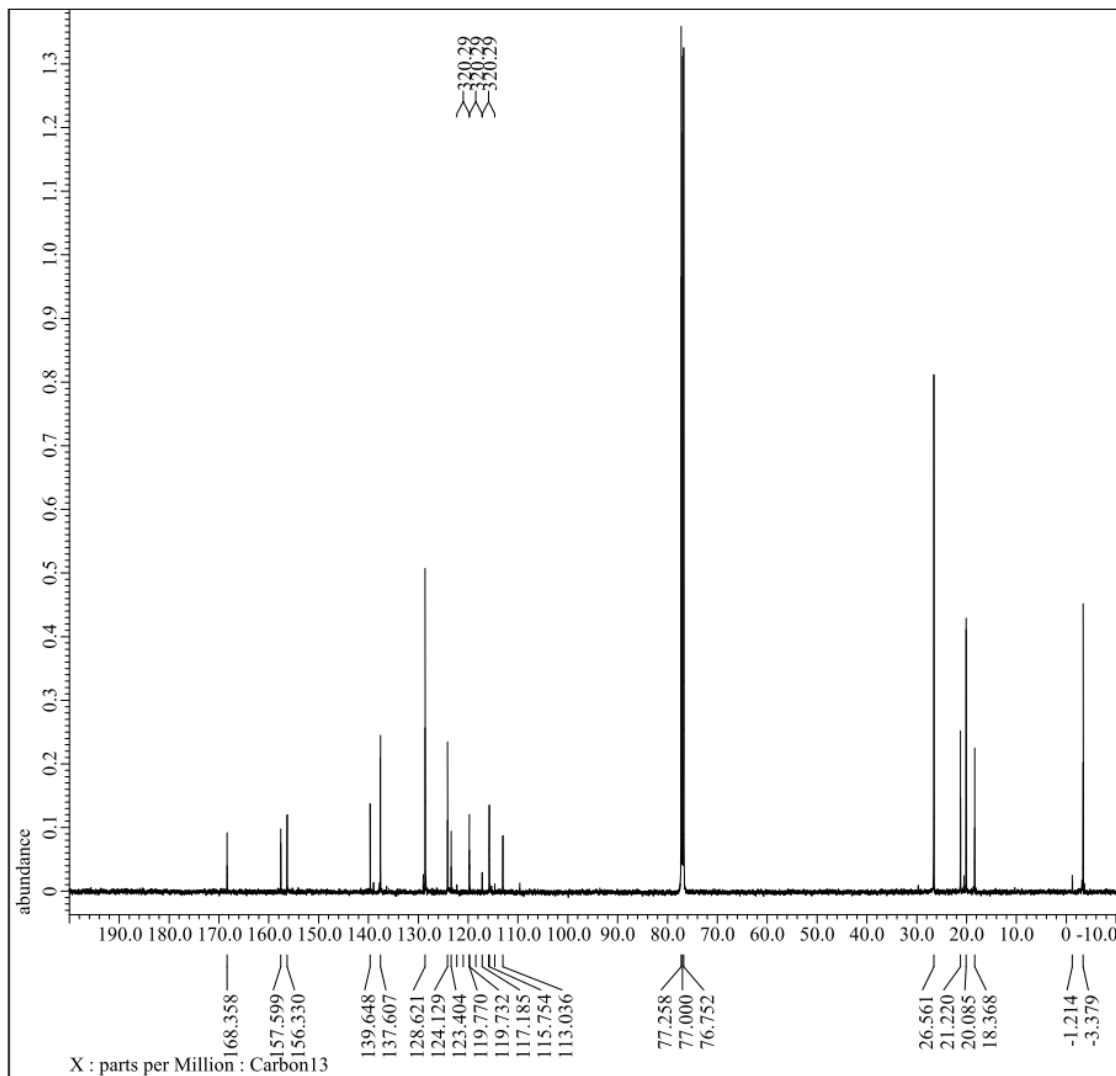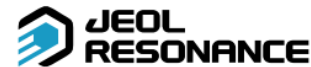

```

Filename      = Ymsd05-021-03_Carbon-1-4
Author       = delta
Experiment   = carbon_jxp
Sample_Id    = Ymsd05-021-03
Solvent      = CHLOROFORM-D
Creation_Time = 9-MAY-2015 00:26:27
Revision_Time = 29-MAY-2015 09:53:23
Current_Time  = 29-MAY-2015 09:54:01

Comment      = single pulse decoupled g
Data Format   = 1D COMPLEX
Dim_Size     = 26214
Dim_Title    = Carbon13
Dim_Units    = [ppm]
Dimensions   = X
Site         = JNM-ECA500
Spectrometer = DELTA2_NMR

Field_Strength = 11.7473579[T] (500[MHz])
X_Acq_Duration = 0.83361792[s]
X_Domain       = 13C
X_Freq         = 125.76529768[MHz]
X_Offset       = 100[ppm]
X_Points      = 32768
X_Prescans    = 4
X_Resolution  = 1.19959034[Hz]
X_Sweep       = 39.3081761[kHz]
X_Sweep_Clipped = 31.44654088[kHz]
Irr_Domain    = Proton
Irr_Freq     = 500.15991521[MHz]
Irr_Offset    = 5.0[ppm]
Clipped      = FALSE
Scans        = 2048
Total_Scans  = 2048

Relaxation_Delay = 2[s]
Recvr_Gain       = 60
Temp_Get         = 20[dC]
X_90_Width      = 9.6[us]
X_Acq_Time      = 0.83361792[s]
X_Angle         = 30[deg]
X_Atn           = 4.1[dB]
X_Pulse        = 3.2[us]
Irr_Atn_Dec    = 21.587[dB]
Irr_Atn_Noise  = 21.587[dB]
Irr_Noise      = WALTZ
Irr_Pwidth     = 92[us]
Decoupling     = TRUE
Initial_Wait   = 1[s]
Noe            = TRUE
Noe_Time       = 2[s]
Repetition_Time = 2.83361792[s]
  
```

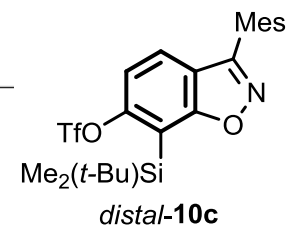



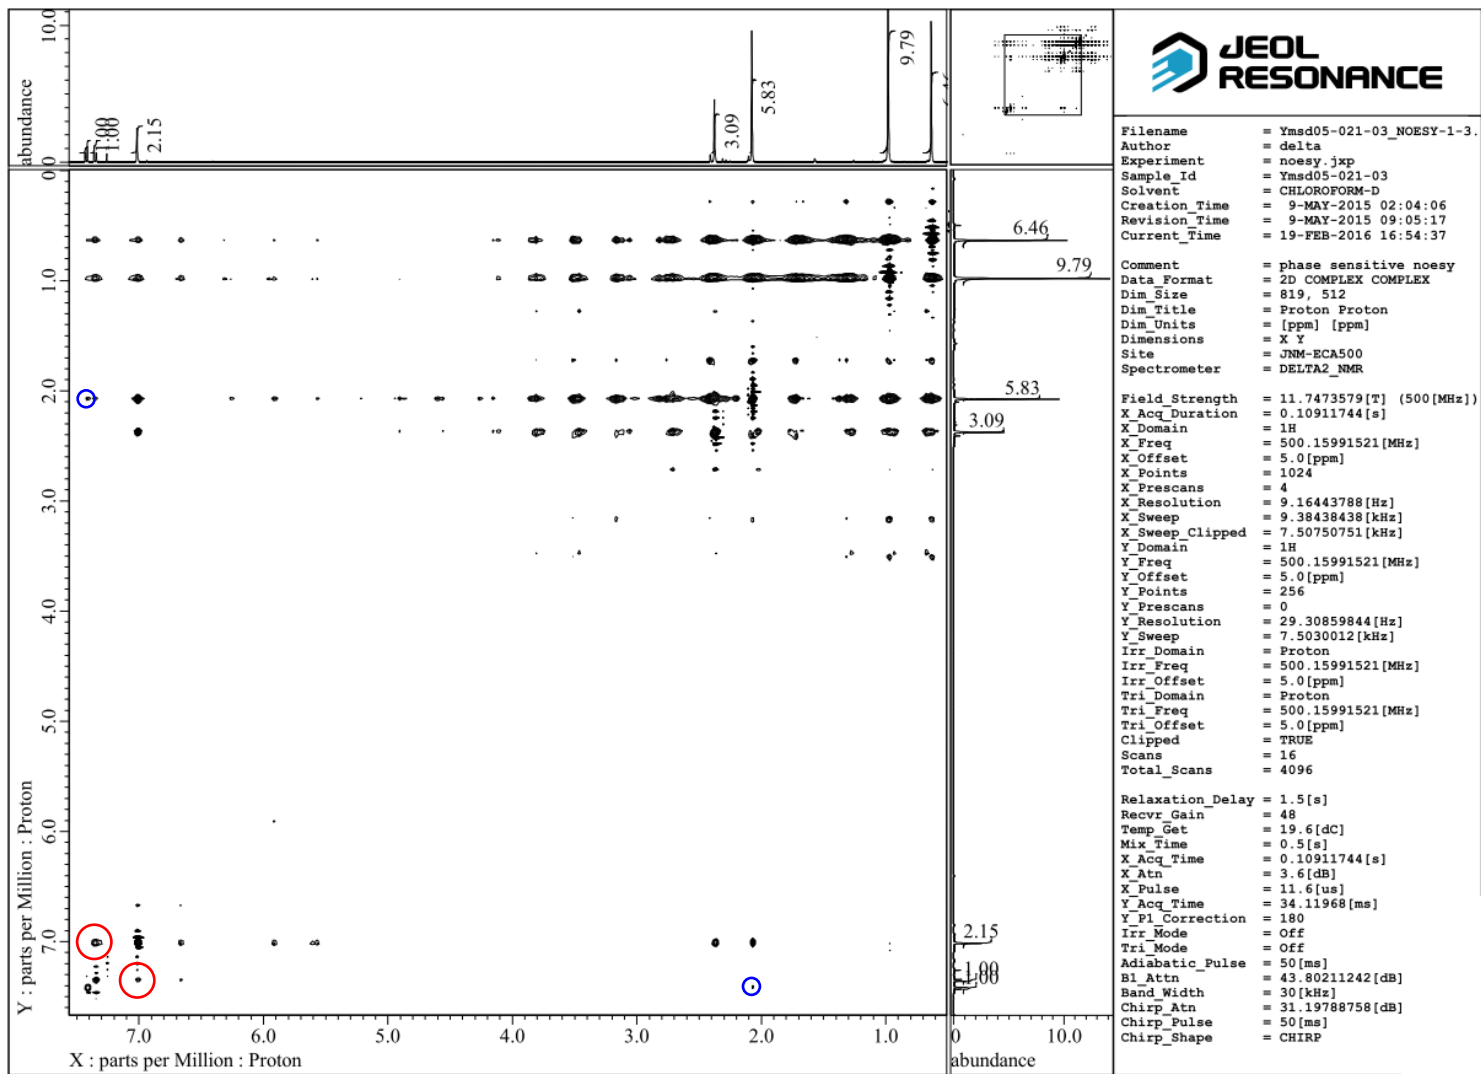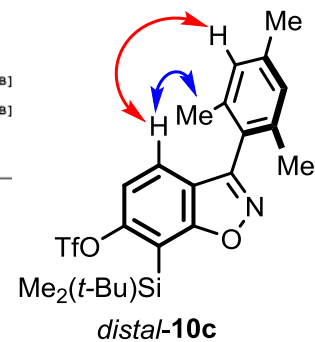

You created this PDF from an application that is not licensed to print to novaPDF printer (<http://www.novapdf.com>)

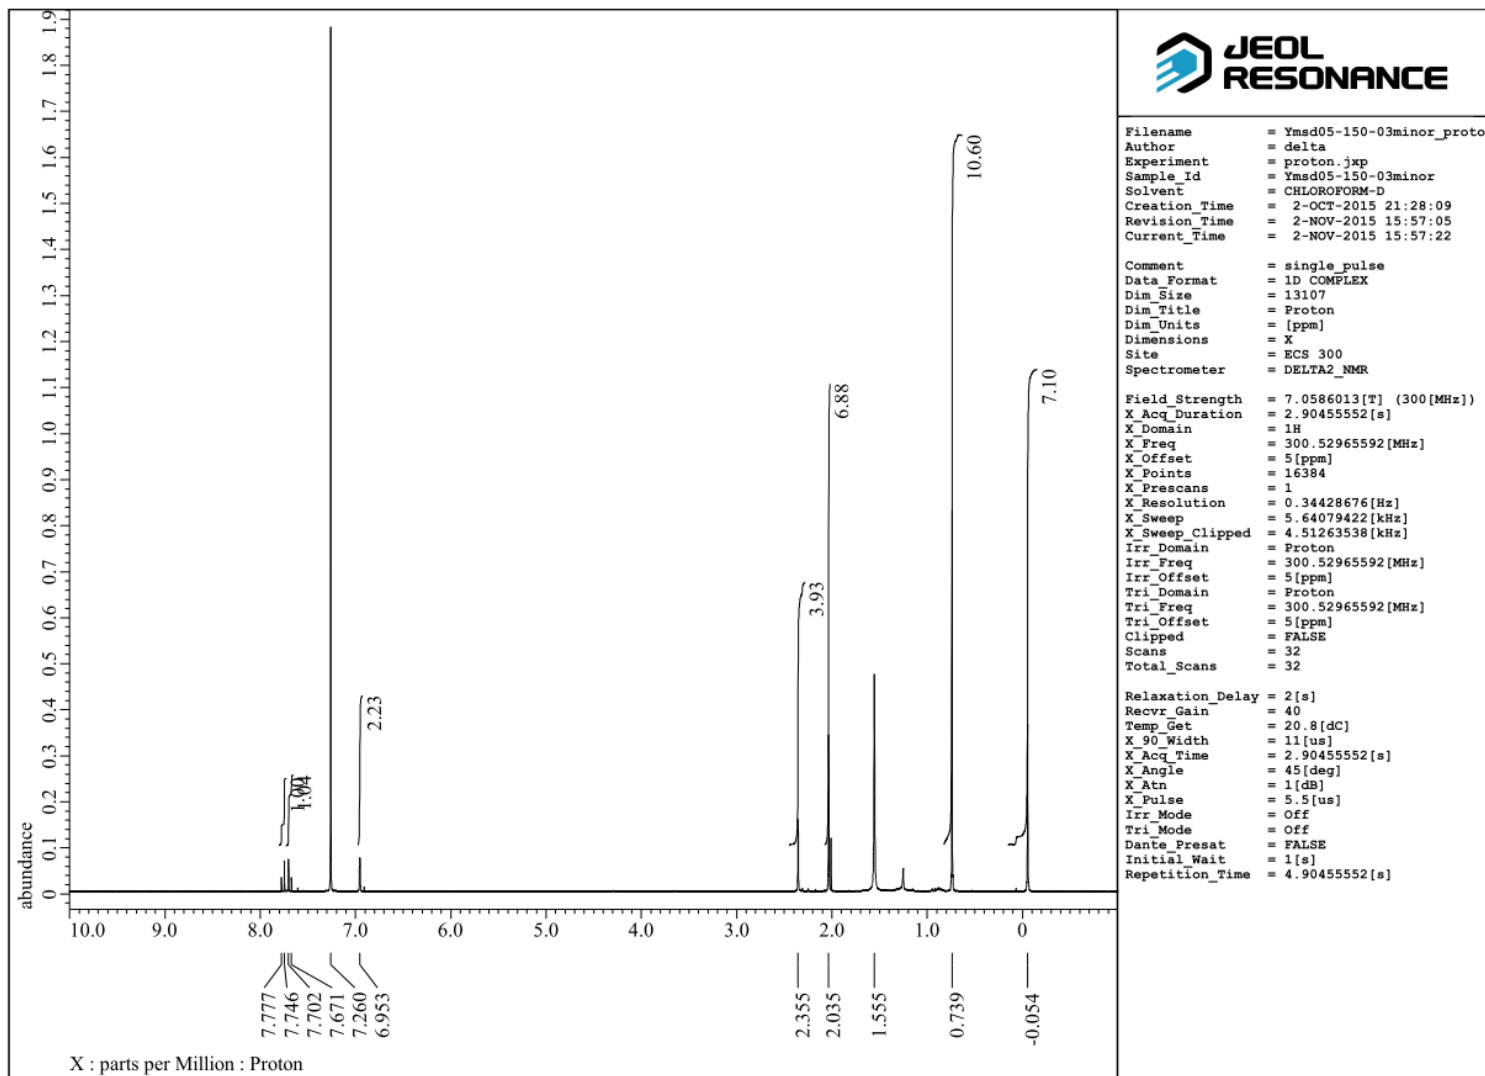

You created this PDF from an application that is not licensed to print to novaPDF printer (<http://www.novapdf.com>)

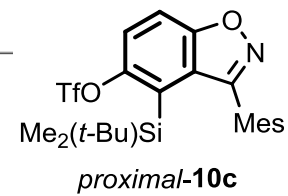

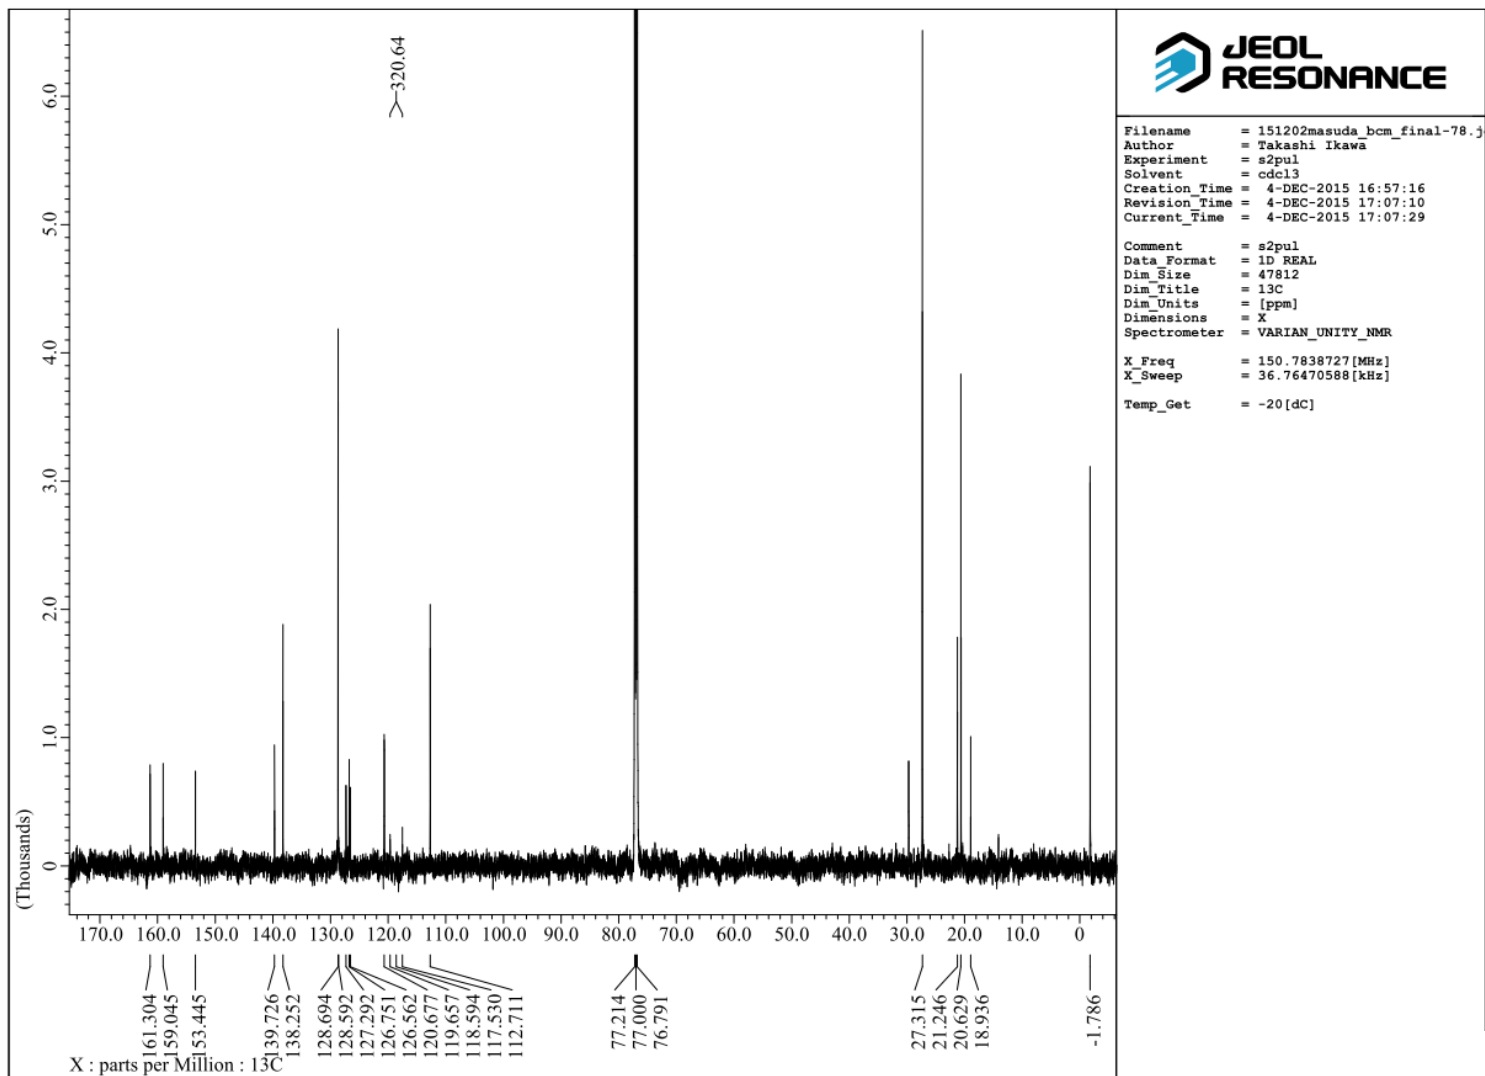

You created this PDF from an application that is not licensed to print to novaPDF printer (<http://www.novapdf.com>)

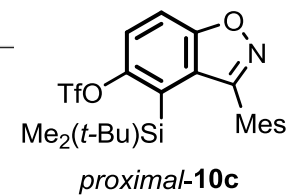

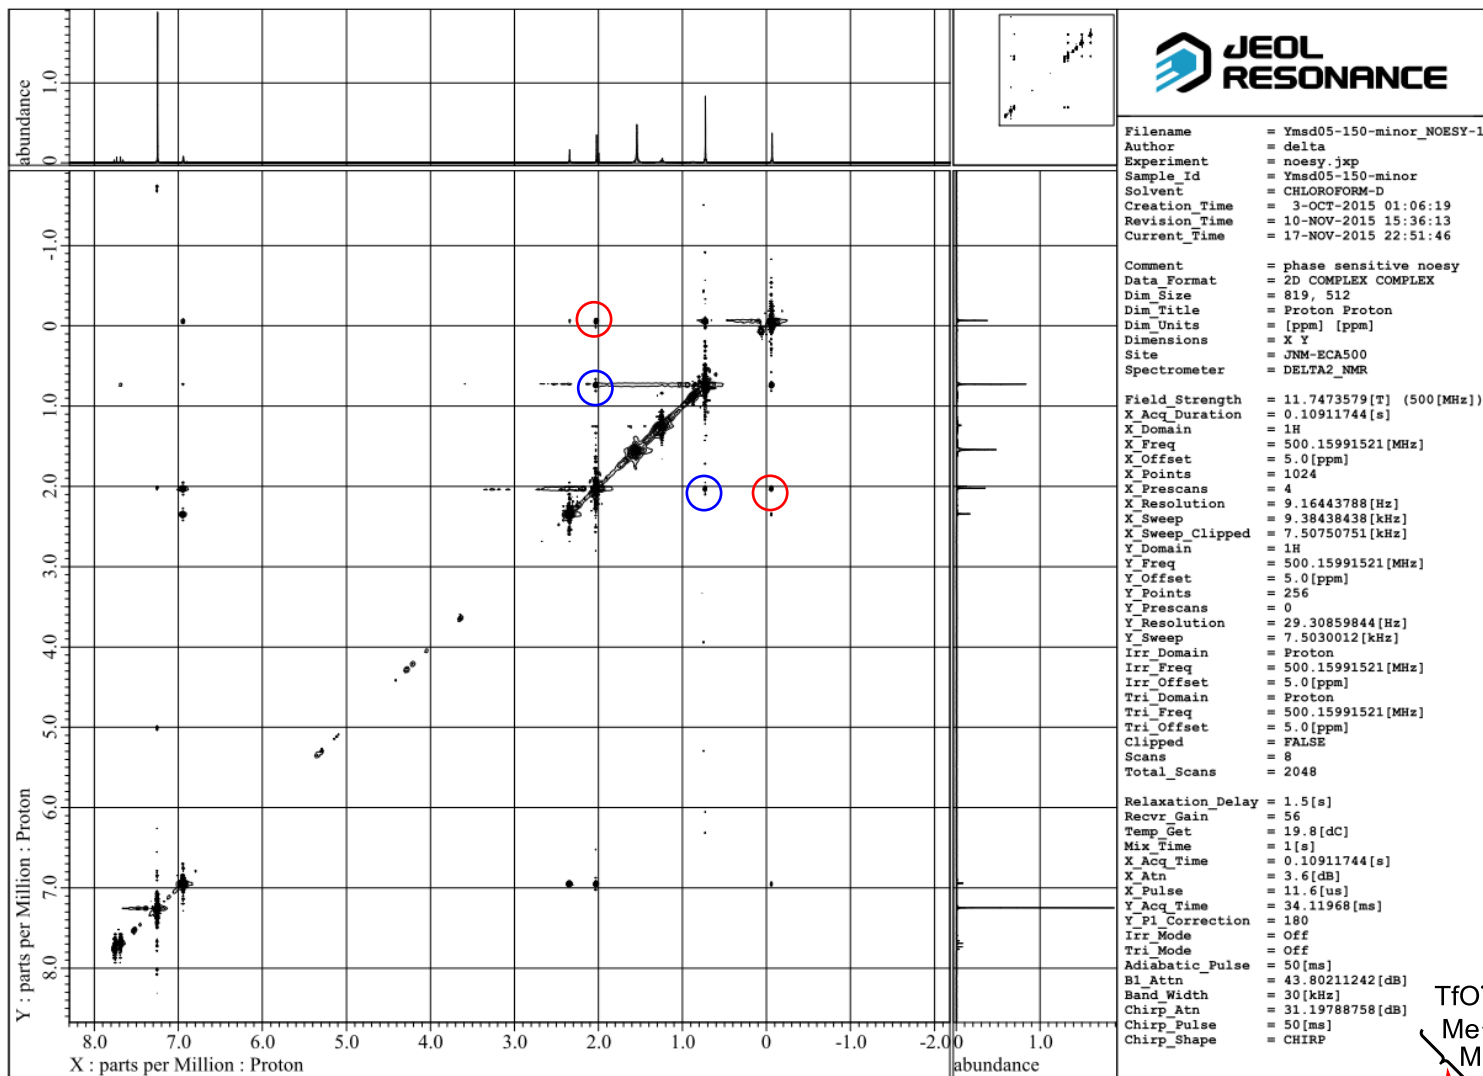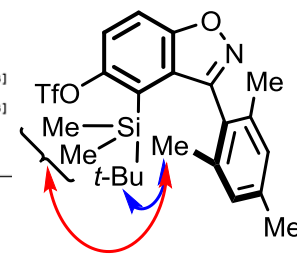

proximal-10c

You created this PDF from an application that is not licensed to print to novaPDF printer (<http://www.novapdf.com>)

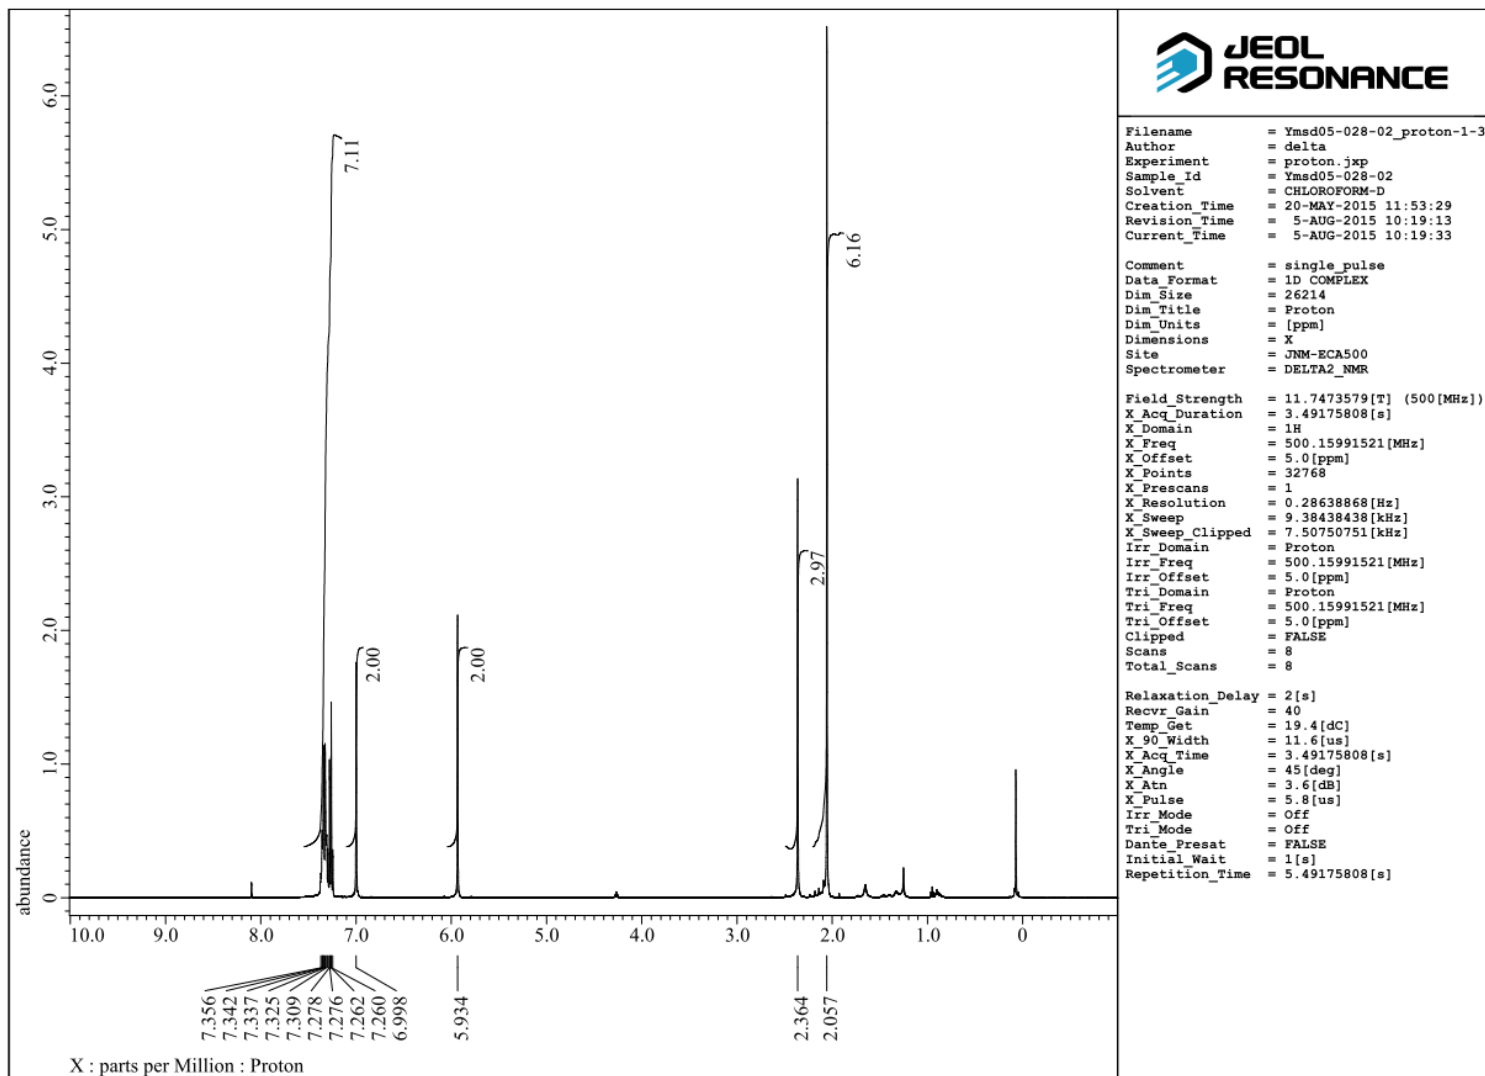

You created this PDF from an application that is not licensed to print to novaPDF printer (<http://www.novapdf.com>)

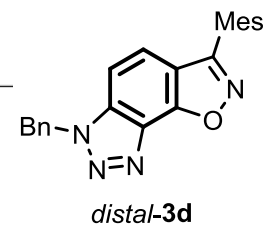

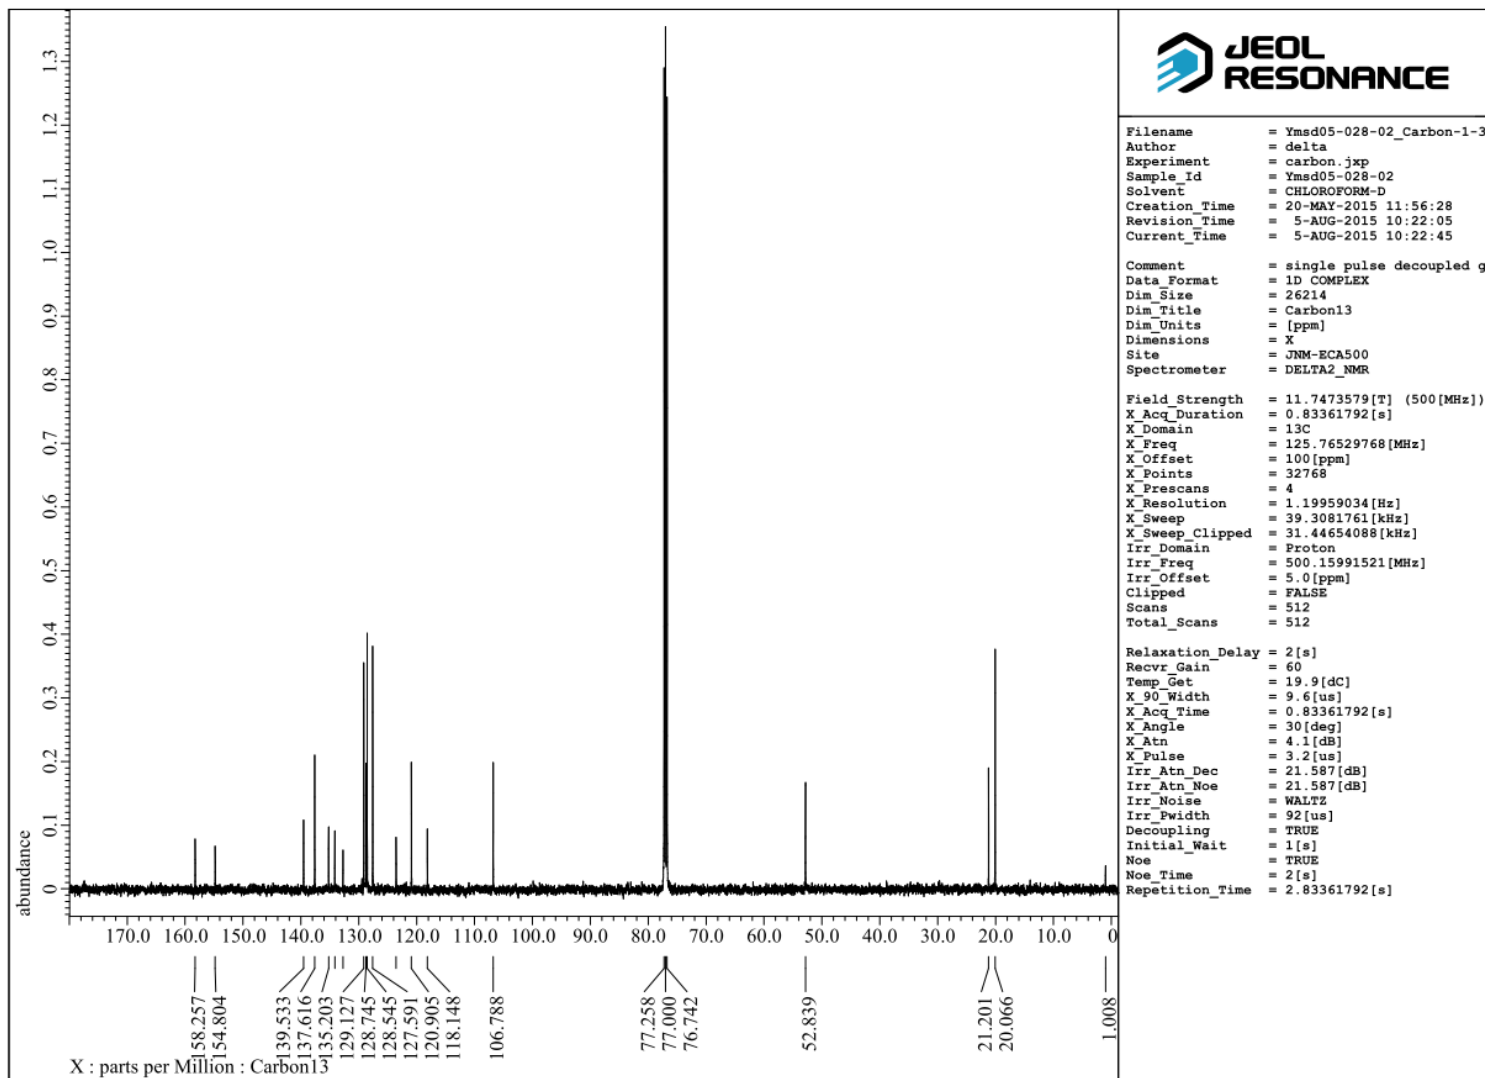

You created this PDF from an application that is not licensed to print to novaPDF printer (<http://www.novapdf.com>)

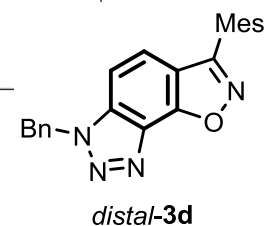

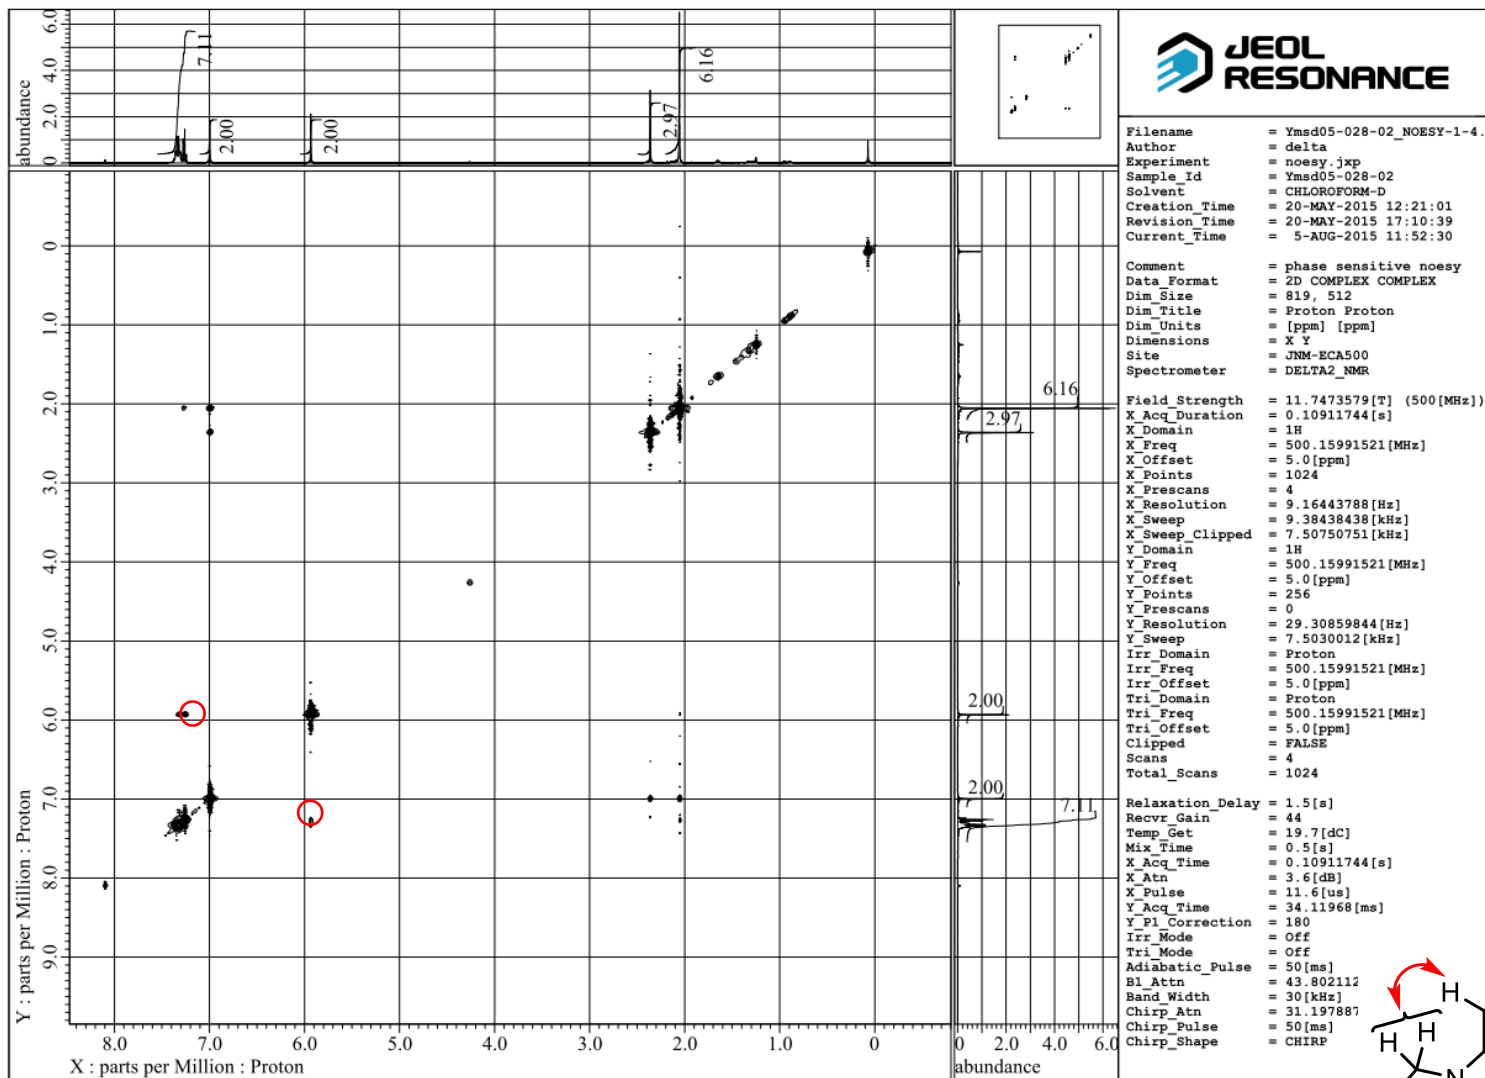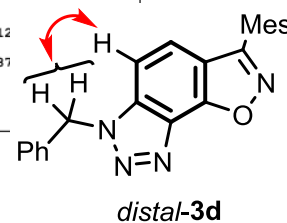

You created this PDF from an application that is not licensed to print to novaPDF printer (<http://www.novapdf.com>)

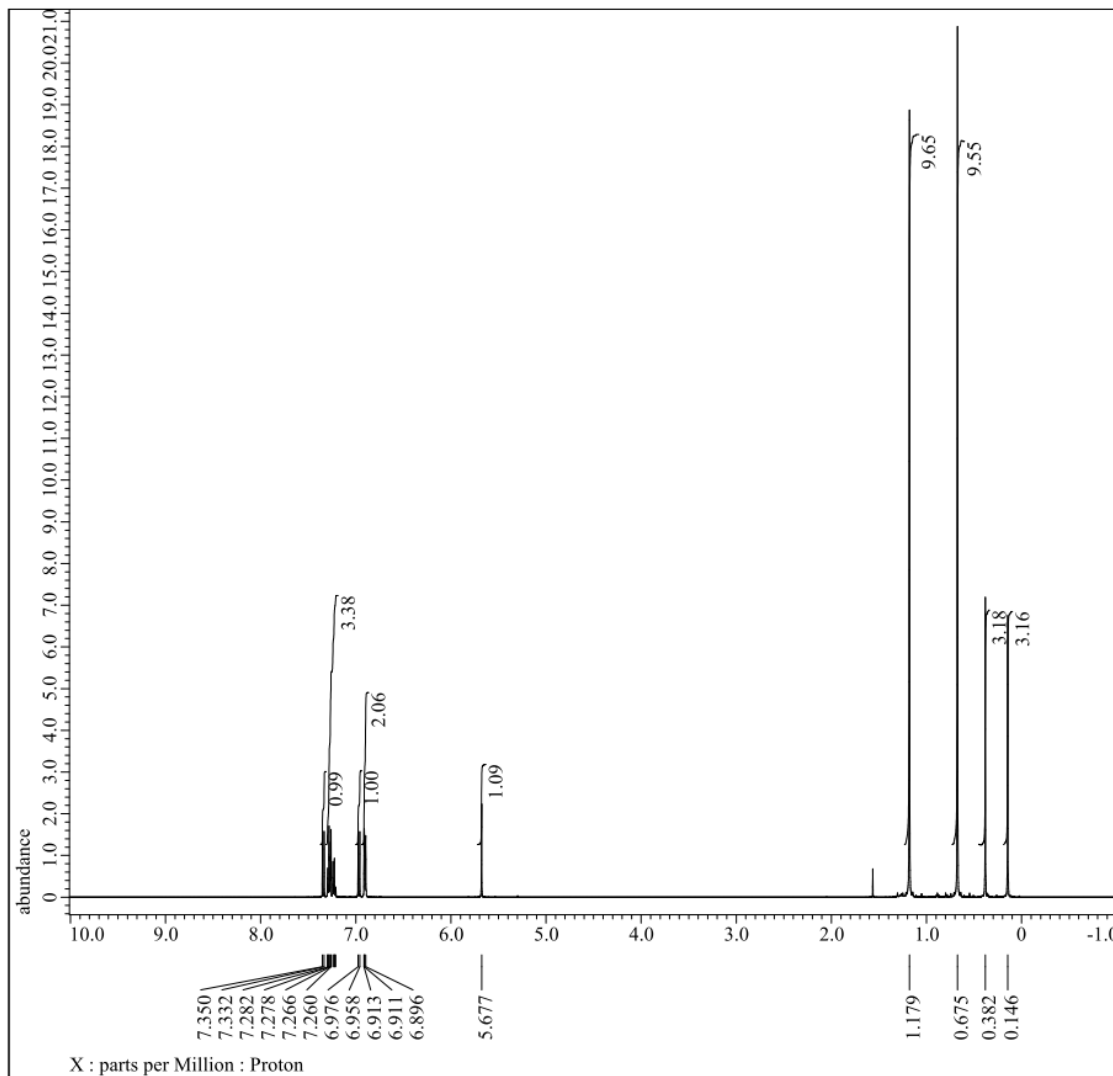

```

Filename      = Ymsd04-164-09_proton-1-3
Author       = delta
Experiment   = proton_jxp
Sample_Id    = Ymsd04-164-09
Solvent      = CHLOROFORM-D
Creation_Time = 8-APR-2015 23:59:57
Revision_Time = 9-APR-2015 06:07:33
Current_Time  = 9-APR-2015 06:08:00

Comment      = single pulse
Data Format   = 1D COMPLEX
Dim_Size     = 13107
Dim_Title    = Proton
Dim_Units    = [ppm]
Dimensions   = X
Site         = JNM-ECA500
Spectrometer = DELTA2_NMR

Field_Strength = 11.7473579[T] (500[MHz])
X_Acq_Duration = 1.74587904[s]
X_Domain      = 1H
X_Freq        = 500.15991521[MHz]
X_Offset      = 5.0[ppm]
X_Points     = 16384
X_Prescans   = 1
X_Resolution = 0.57277737[Hz]
X_Sweep      = 9.38438438[kHz]
X_Sweep_Clip = 7.50750751[kHz]
Irr_Domain   = Proton
Irr_Freq     = 500.15991521[MHz]
Irr_Offset   = 5.0[ppm]
Tri_Domain   = Proton
Tri_Freq     = 500.15991521[MHz]
Tri_Offset   = 5.0[ppm]
Clipped      = FALSE
Scans        = 16
Total_Scans  = 16

Relaxation_Delay = 2[s]
Recvr_Gain       = 34
Temp_Get         = 17.7[dC]
X_90_Width      = 11.6[us]
X_Acq_Time      = 1.74587904[s]
X_Angle         = 45[deg]
X_Atn           = 3.6[db]
X_Pulse         = 5.8[us]
Irr_Mode        = Off
Tri_Mode        = Off
Dante_Presat    = FALSE
Initial_Wait    = 1[s]
Repetition_Time = 3.74587904[s]

```

You created this PDF from an application that is not licensed to print to novaPDF printer (<http://www.novapdf.com>)

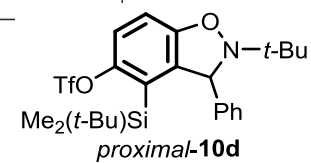



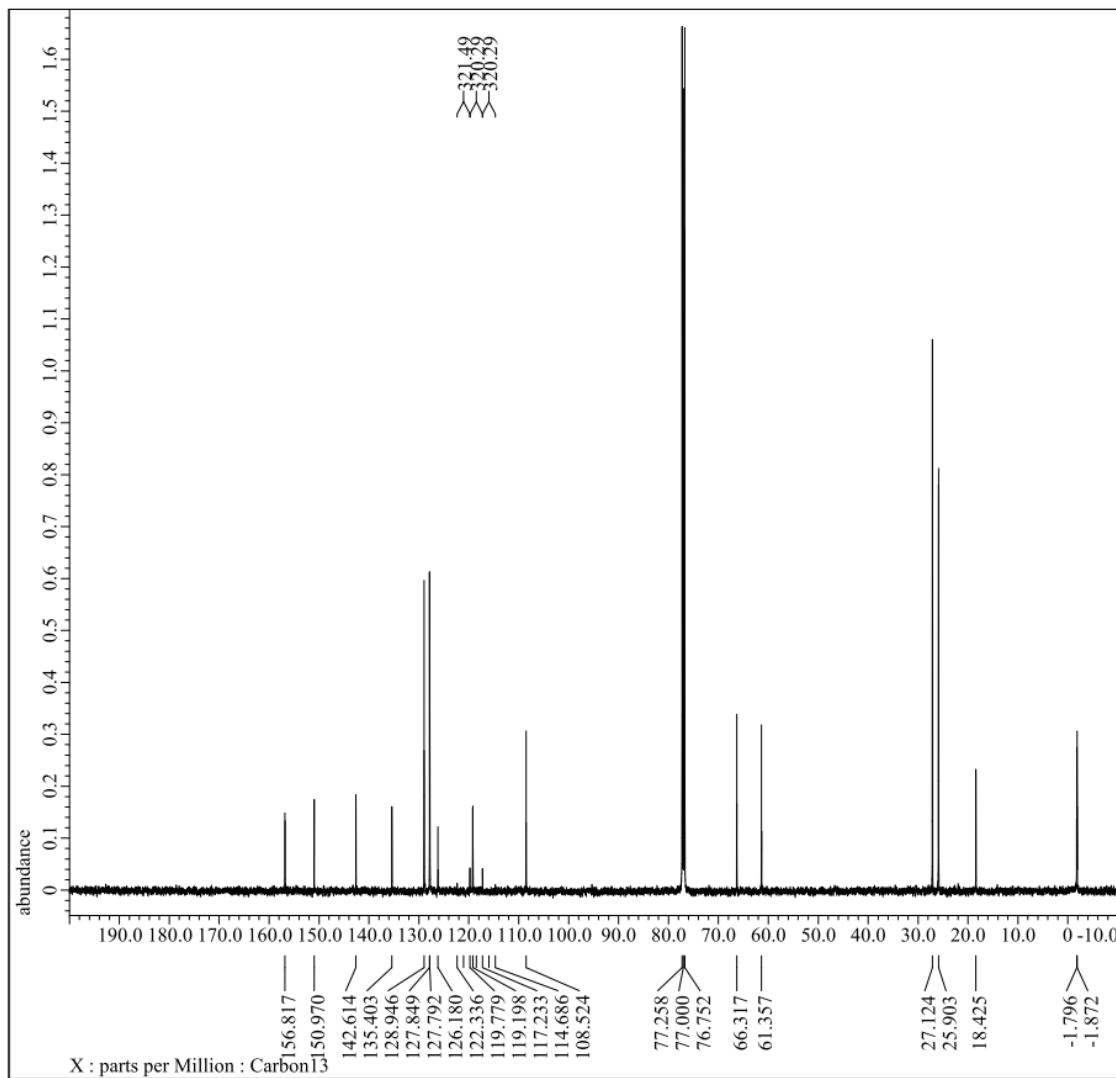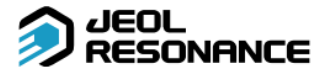

```

Filename      = Ymsd04-164-09_Carbon-1-3
Author       = delta
Experiment   = carbon_jxp
Sample_Id    = Ymsd04-164-09
Solvent      = CHLOROFORM-D
Creation_Time = 9-APR-2015 00:04:37
Revision_Time = 9-APR-2015 10:15:16
Current_Time  = 9-APR-2015 10:16:26

Comment      = single pulse decoupled g
Data Format   = 1D COMPLEX
Dim Size     = 26214
Dim Title    = Carbon13
Dim Units    = [ppm]
Dimensions   = X
Site         = JNM-ECA500
Spectrometer = DELTA2_NMR

Field_Strength = 11.7473579[T] (500[MHz])
X_Acq_Duration = 0.83361792[s]
X_Domain       = 13C
X_Freq         = 125.76529768[MHz]
X_Offset       = 100[ppm]
X_Points       = 32768
X_Prescans     = 4
X_Resolution   = 1.19959034 [Hz]
X_Sweep        = 39.3081761 [kHz]
X_Sweep_Clipped = 31.44654088 [kHz]
Irr_Domain     = Proton
Irr_Freq       = 500.15991521[MHz]
Irr_Offset     = 5.0[ppm]
Clipped        = FALSE
Scans          = 500
Total_Scans    = 500

Relaxation_Delay = 2[s]
Recvr_Gain       = 60
Temp_Get         = 18[dC]
X_90_Width      = 9.6[us]
X_Acq_Time       = 0.83361792[s]
X_Angle         = 30[deg]
X_Atn           = 4.1[dB]
X_Pulse         = 3.2[us]
Irr_Atn_Dec     = 21.587 [dB]
Irr_Atn_Noise   = 21.587 [dB]
Irr_Noise       = WALTZ
Irr_Width       = 92[us]
Decoupling      = TRUE
Initial_Wait    = 1[s]
Noe              = TRUE
Noe_Time        = 2[s]
Repetition_Time = 2.83361792[s]

```

You created this PDF from an application that is not licensed to print to novaPDF printer (<http://www.novapdf.com>)

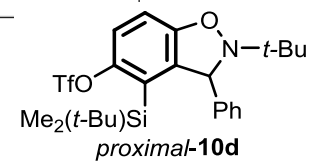

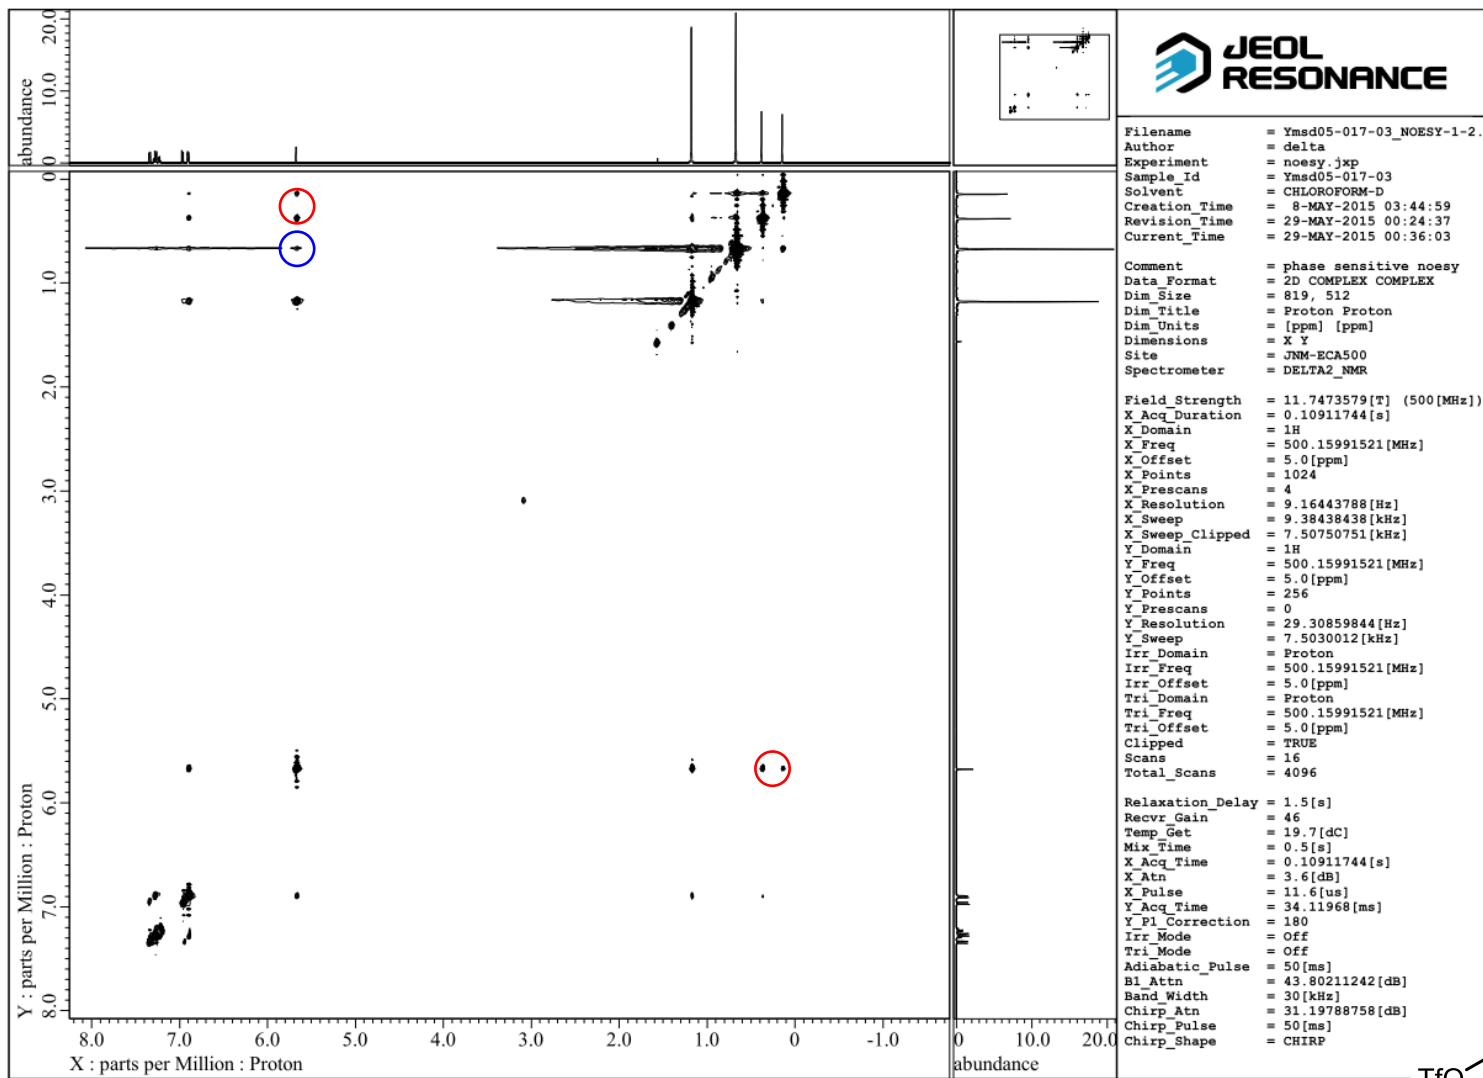

You created this PDF from an application that is not licensed to print to novaPDF printer (<http://www.novapdf.com>)

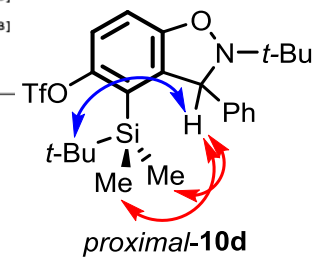

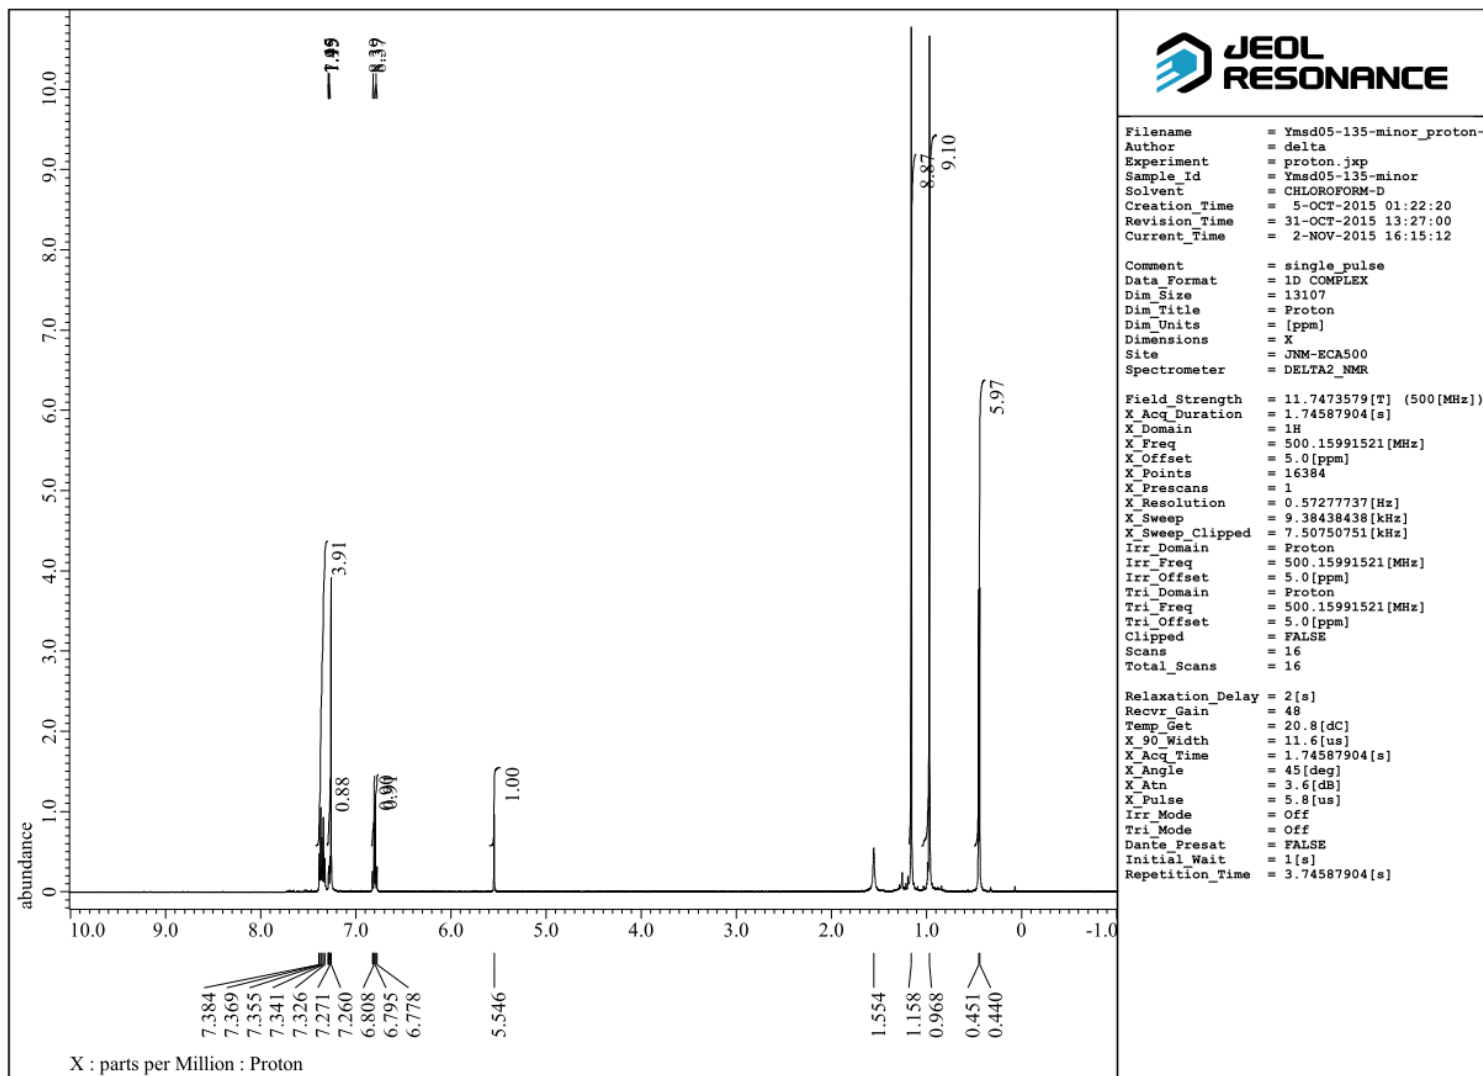

You created this PDF from an application that is not licensed to print to novaPDF printer (<http://www.novapdf.com>)

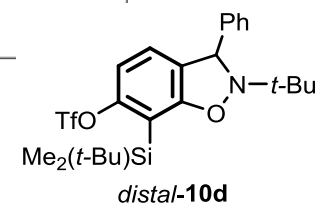

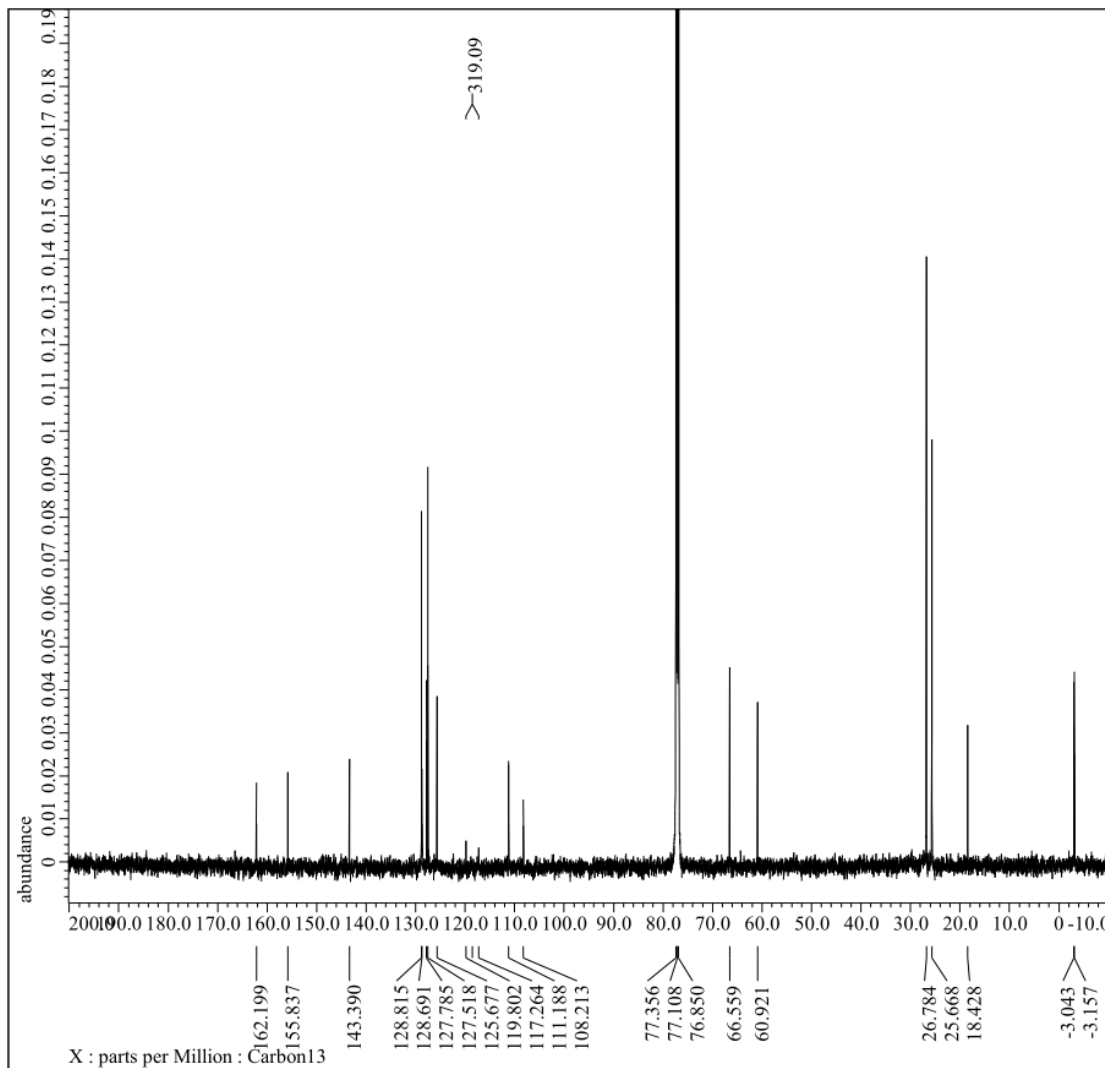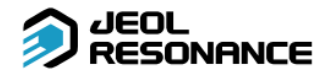

```

Filename      = Ymsd05-135-minor_Carbon-
Author       = delta
Experiment    = carbon_jxp
Sample_Id     = Ymsd05-135-minor
Solvent       = CHLOROFORM-D
Creation_Time = 5-OCT-2015 03:10:03
Revision_Time = 2-NOV-2015 16:19:33
Current_Time  = 2-NOV-2015 16:20:19

Comment      = single pulse decoupled g
Data_Format  = 1D COMPLEX
Dim_Size     = 26214
Dim_Title    = Carbon13
Dim_Units    = [ppm]
Dimensions   = X
Site         = JNM-ECA500
Spectrometer = DELTA2_NMR

Field_Strength = 11.7473579[T] (500 [MHz])
X_Acq_Duration = 0.83361792[s]
X_Domain      = 13C
X_Freq        = 125.76529768 [MHz]
X_Offset      = 100 [ppm]
X_Points      = 32768
X_Prescans    = 4
X_Resolution  = 1.19959034 [Hz]
X_Sweep       = 39.3081761 [kHz]
X_Sweep_Clipped = 31.44654088 [kHz]
Irr_Domain    = Proton
Irr_Freq      = 500.15991521 [MHz]
Irr_Offset    = 5.0 [ppm]
Clipped       = FALSE
Scans         = 7000
Total_Scans   = 7000

Relaxation_Delay = 2 [s]
Recvr_Gain       = 60
Temp_Get         = 20.8 [dC]
X_90_Width      = 9.6 [us]
X_Acq_Time      = 0.83361792 [s]
X_Angle         = 30 [deg]
X_Atn           = 4.1 [dB]
X_Pulse         = 3.2 [us]
Irr_Atn_Dec     = 21.587 [dB]
Irr_Atn_No     = 21.587 [dB]
Irr_Noise       = WALTZ
Irr_Pwidth      = 92 [us]
Decoupling      = TRUE
Initial_Wait    = 1 [s]
Noe             = TRUE
Noe_Time        = 2 [s]
Repetition_Time = 2.83361792 [s]

```

You created this PDF from an application that is not licensed to print to novaPDF printer (<http://www.novapdf.com>)

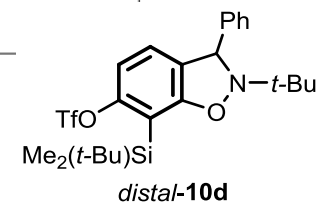

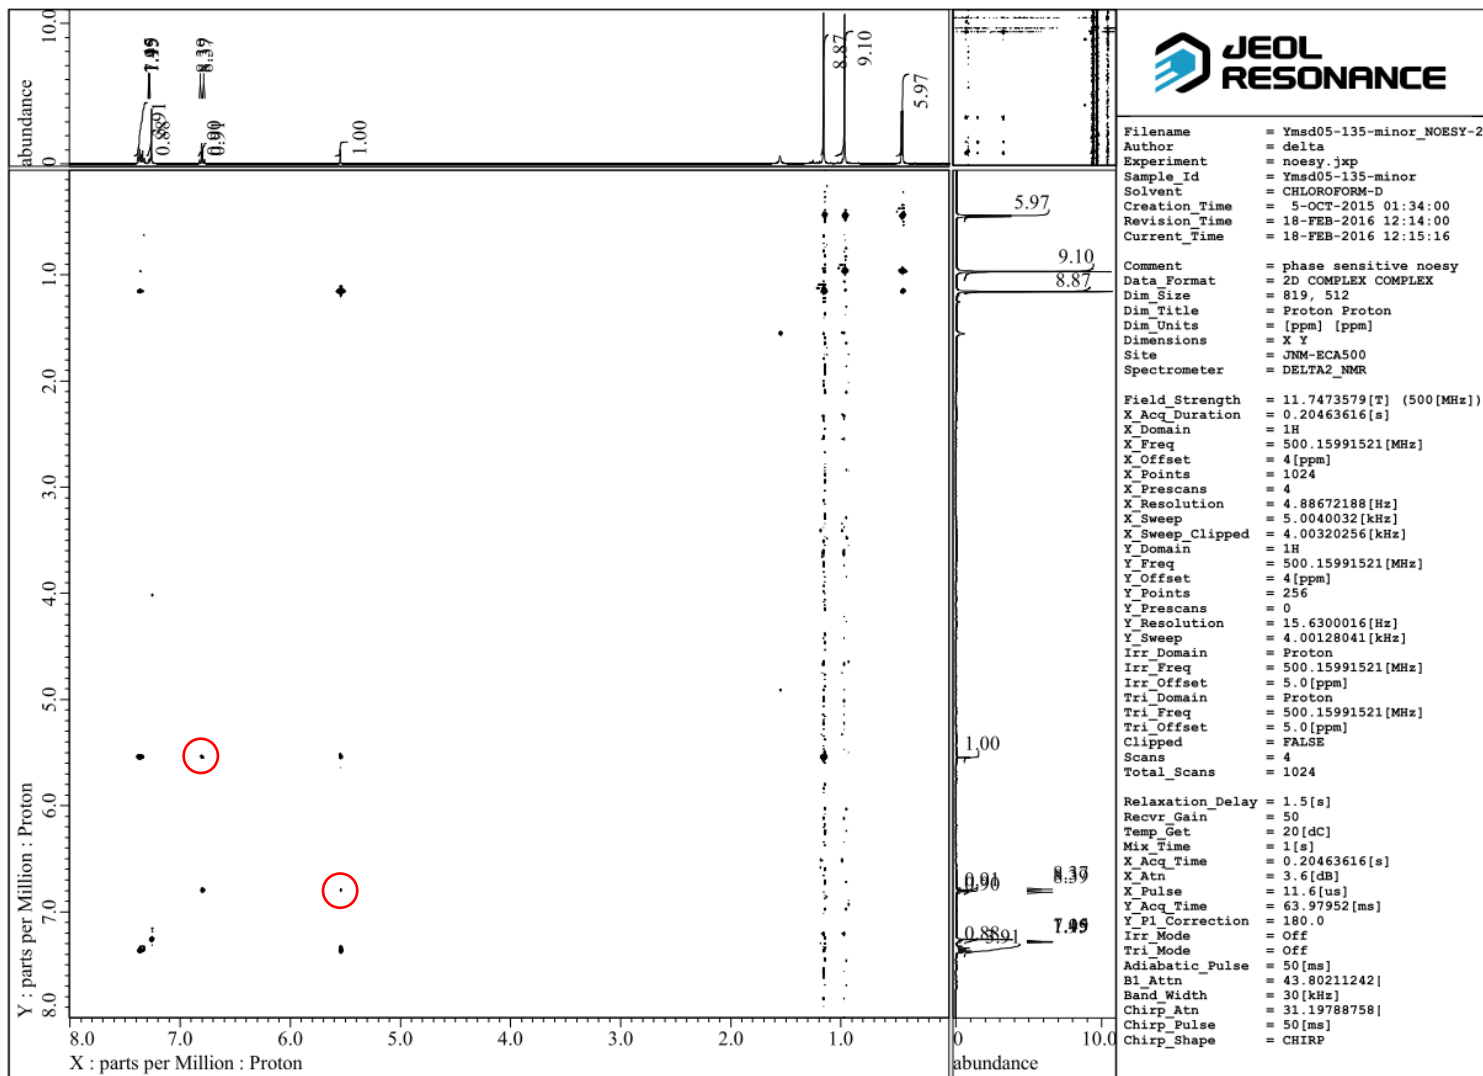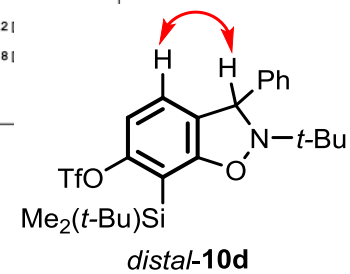

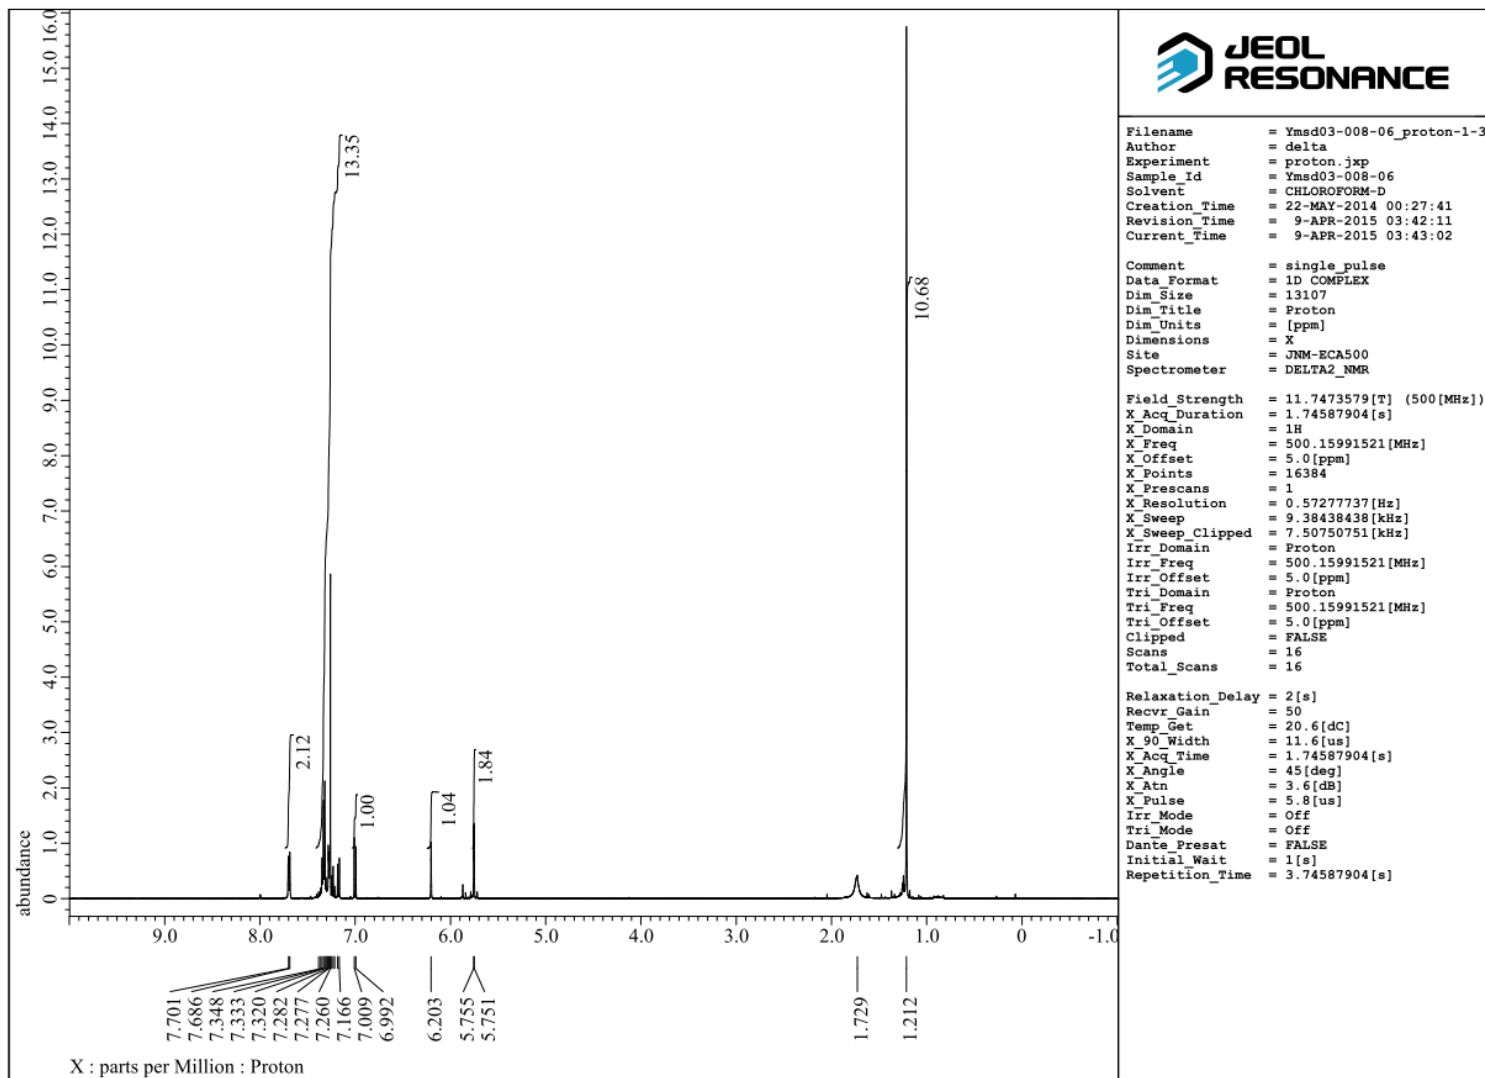

You created this PDF from an application that is not licensed to print to novaPDF printer (<http://www.novapdf.com>)

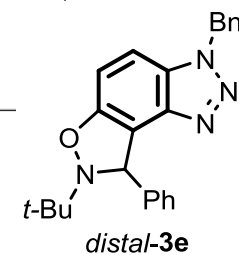

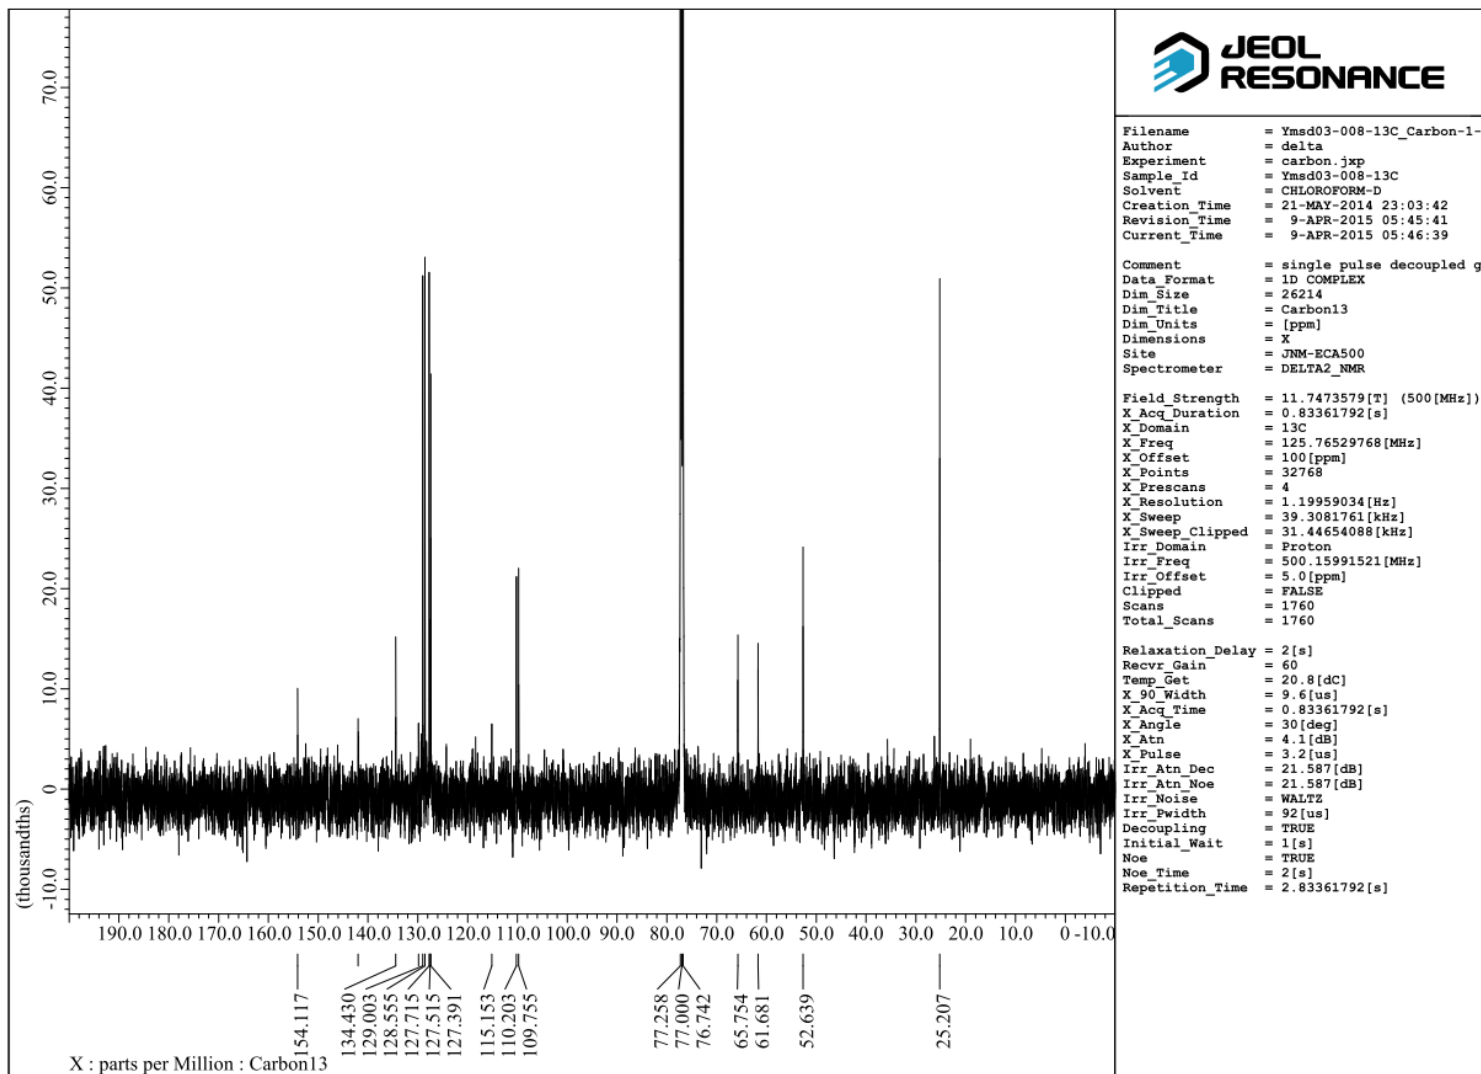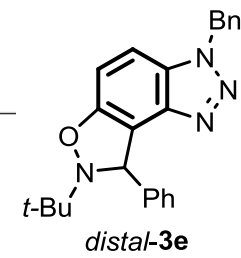

You created this PDF from an application that is not licensed to print to novaPDF printer (<http://www.novapdf.com>)

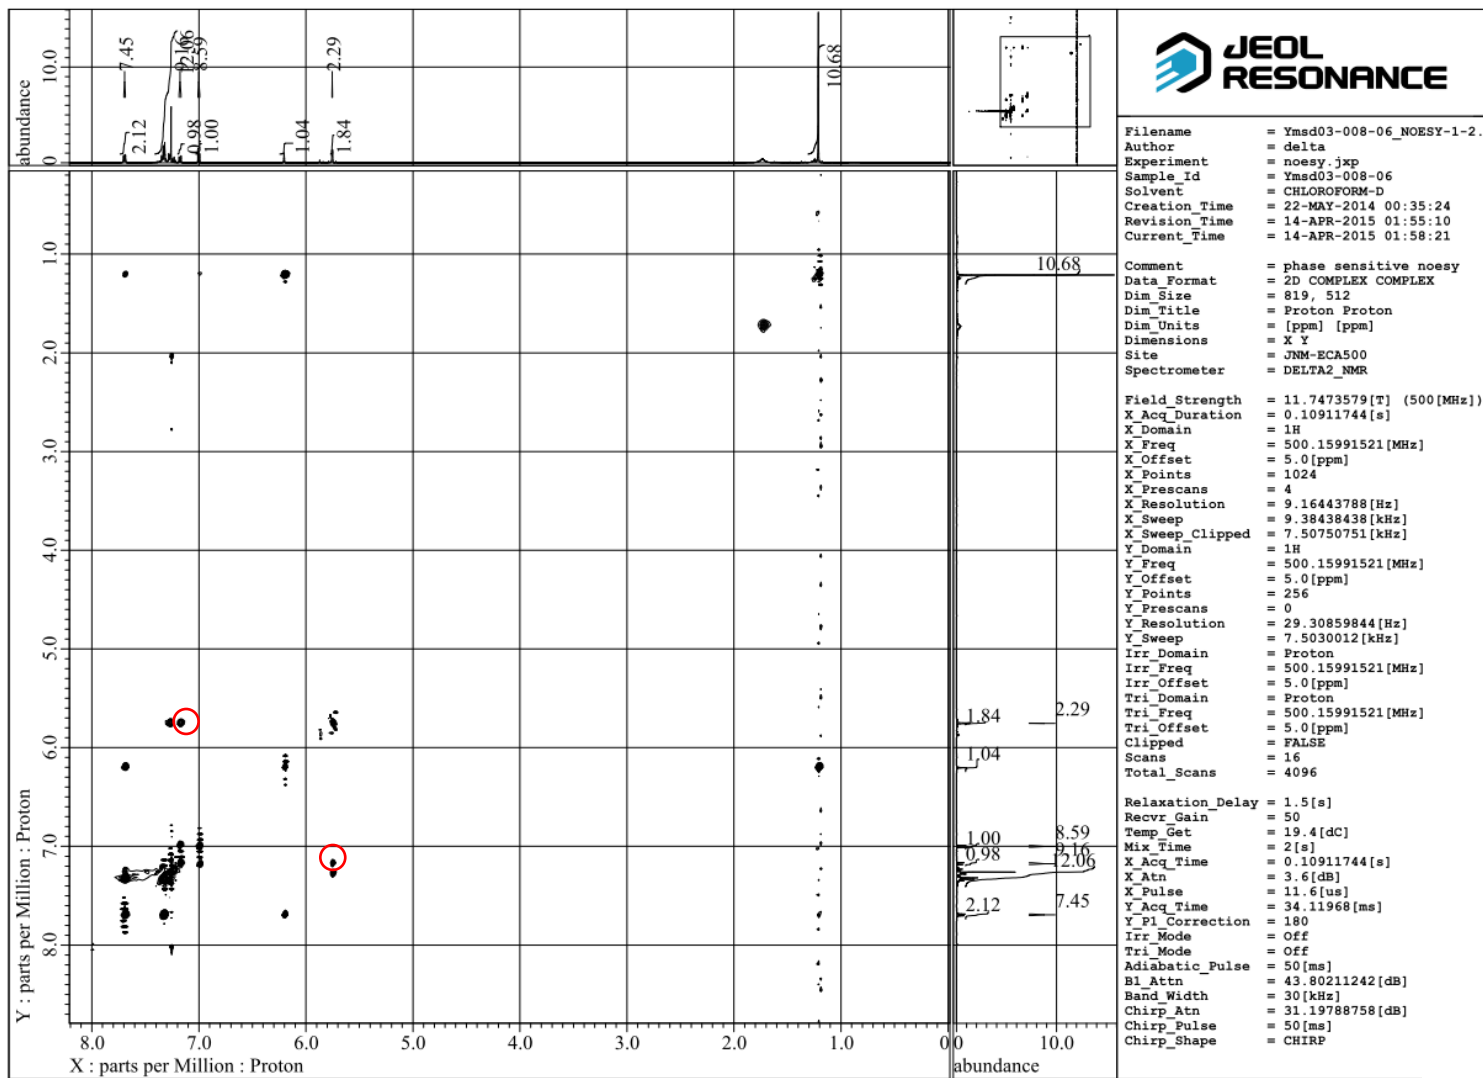

You created this PDF from an application that is not licensed to print to novaPDF printer (<http://www.novapdf.com>)

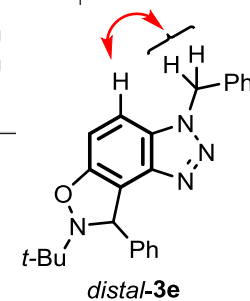



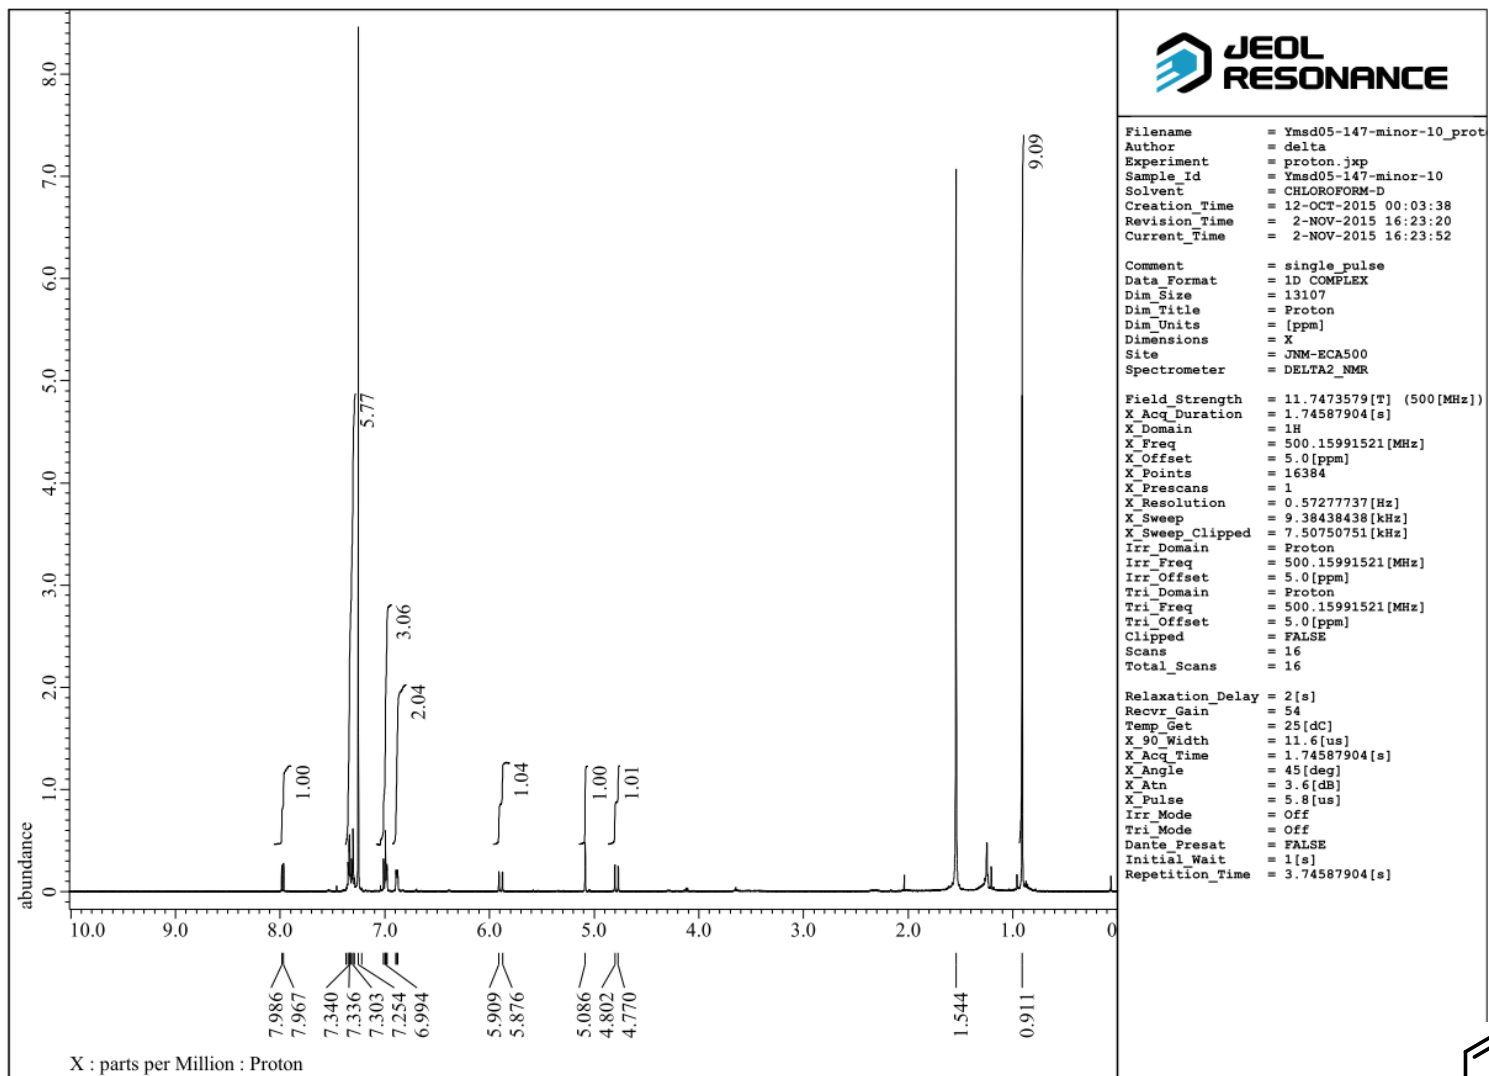

You created this PDF from an application that is not licensed to print to novaPDF printer (<http://www.novapdf.com>)

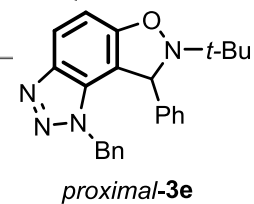

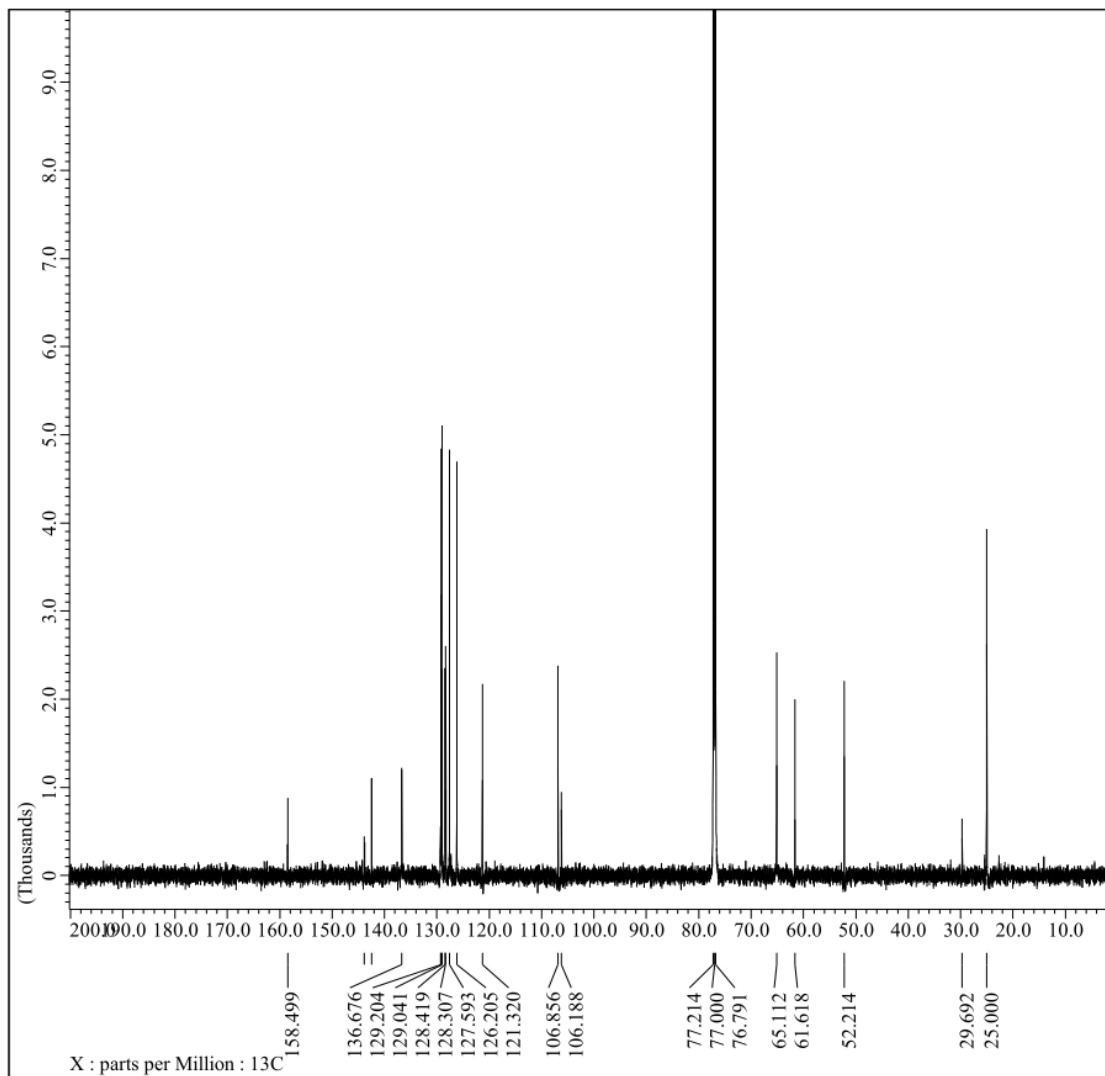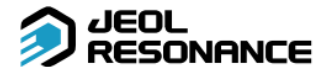

Filename = 151027Masuda\_BCM\_d1=3.0sec  
 Author = shigeaski  
 Experiment = s2pul  
 Solvent = cdcl3  
 Creation\_Time = 28-OCT-2015 21:53:39  
 Revision\_Time = 28-OCT-2015 21:58:00  
 Current\_Time = 2-NOV-2015 16:25:21  
  
 Comment = s2pul  
 Data\_Format = 1D REAL  
 Dim\_Size = 47812  
 Dim\_Title = 13C  
 Dim\_Units = [ppm]  
 Dimensions = X  
 Spectrometer = VARIAN\_UNITY\_NMR  
  
 X\_Freq = 150.7838727 [MHz]  
 X\_Sweep = 36.76470588 [kHz]  
  
 Temp\_Get = -20 [dc]

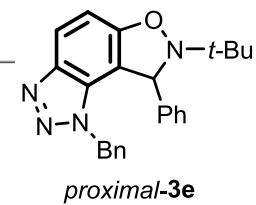

You created this PDF from an application that is not licensed to print to novaPDF printer (<http://www.novapdf.com>)

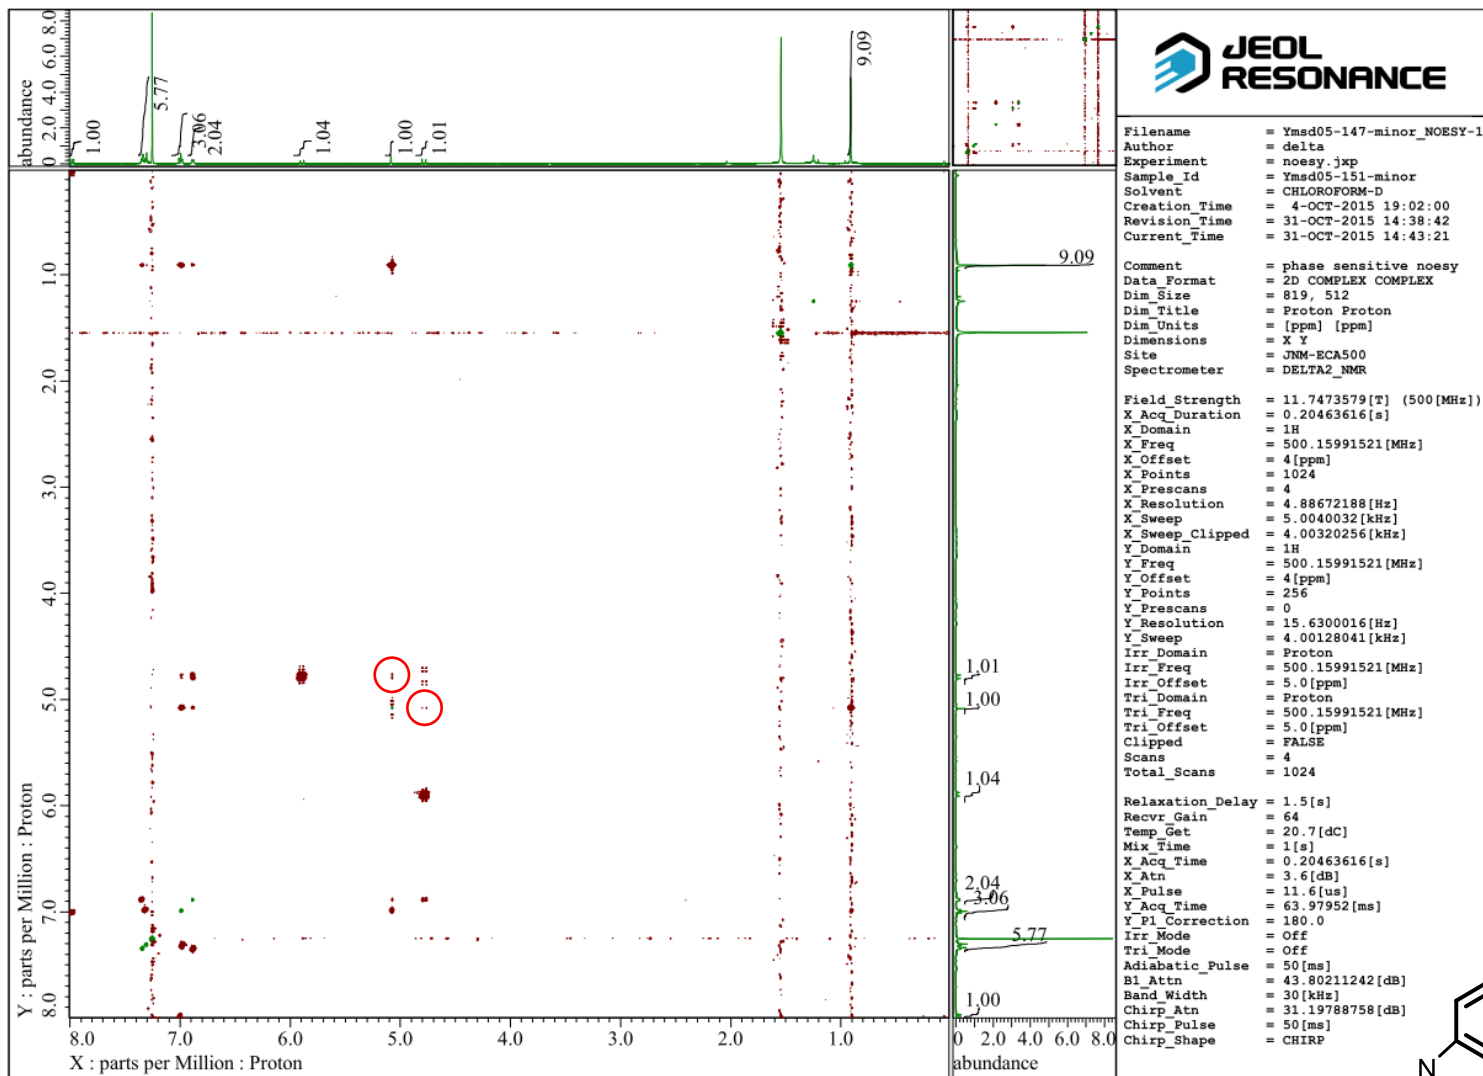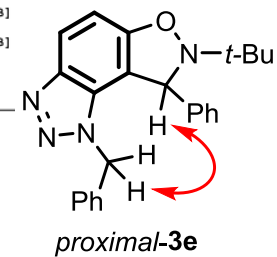

You created this PDF from an application that is not licensed to print to novaPDF printer (<http://www.novapdf.com>)

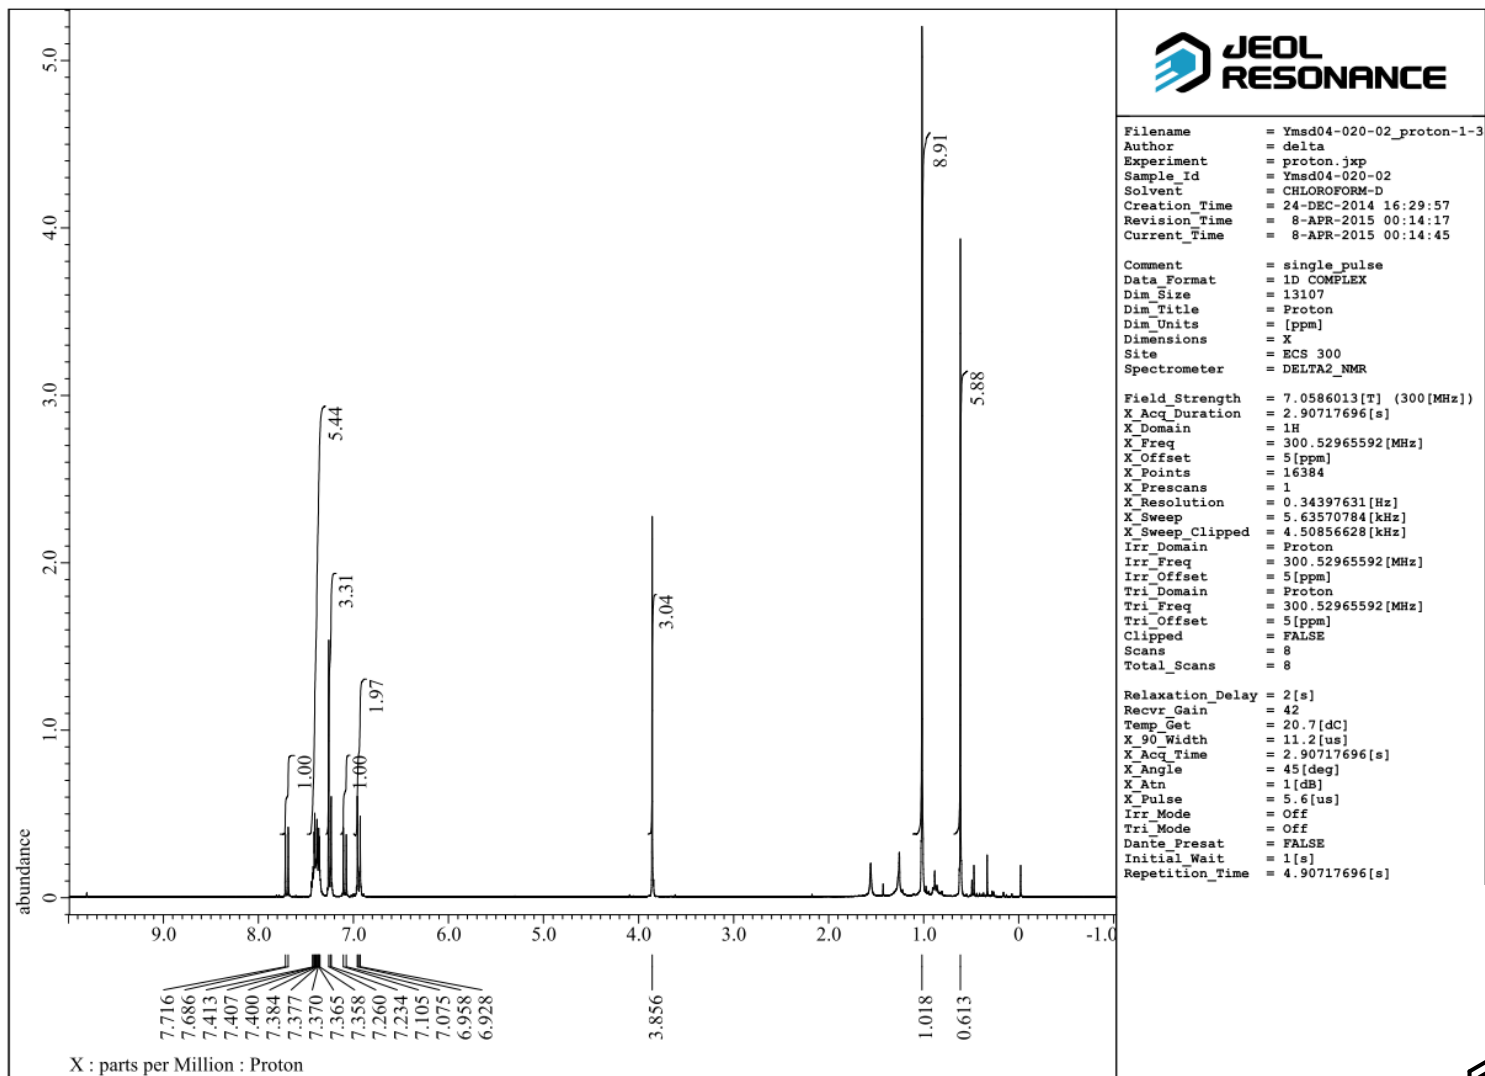

You created this PDF from an application that is not licensed to print to novaPDF printer (<http://www.novapdf.com>)

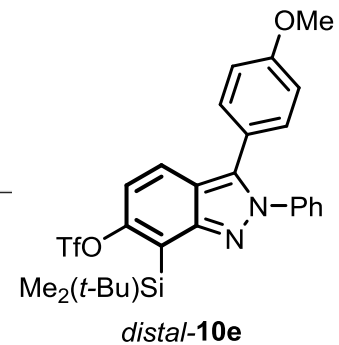

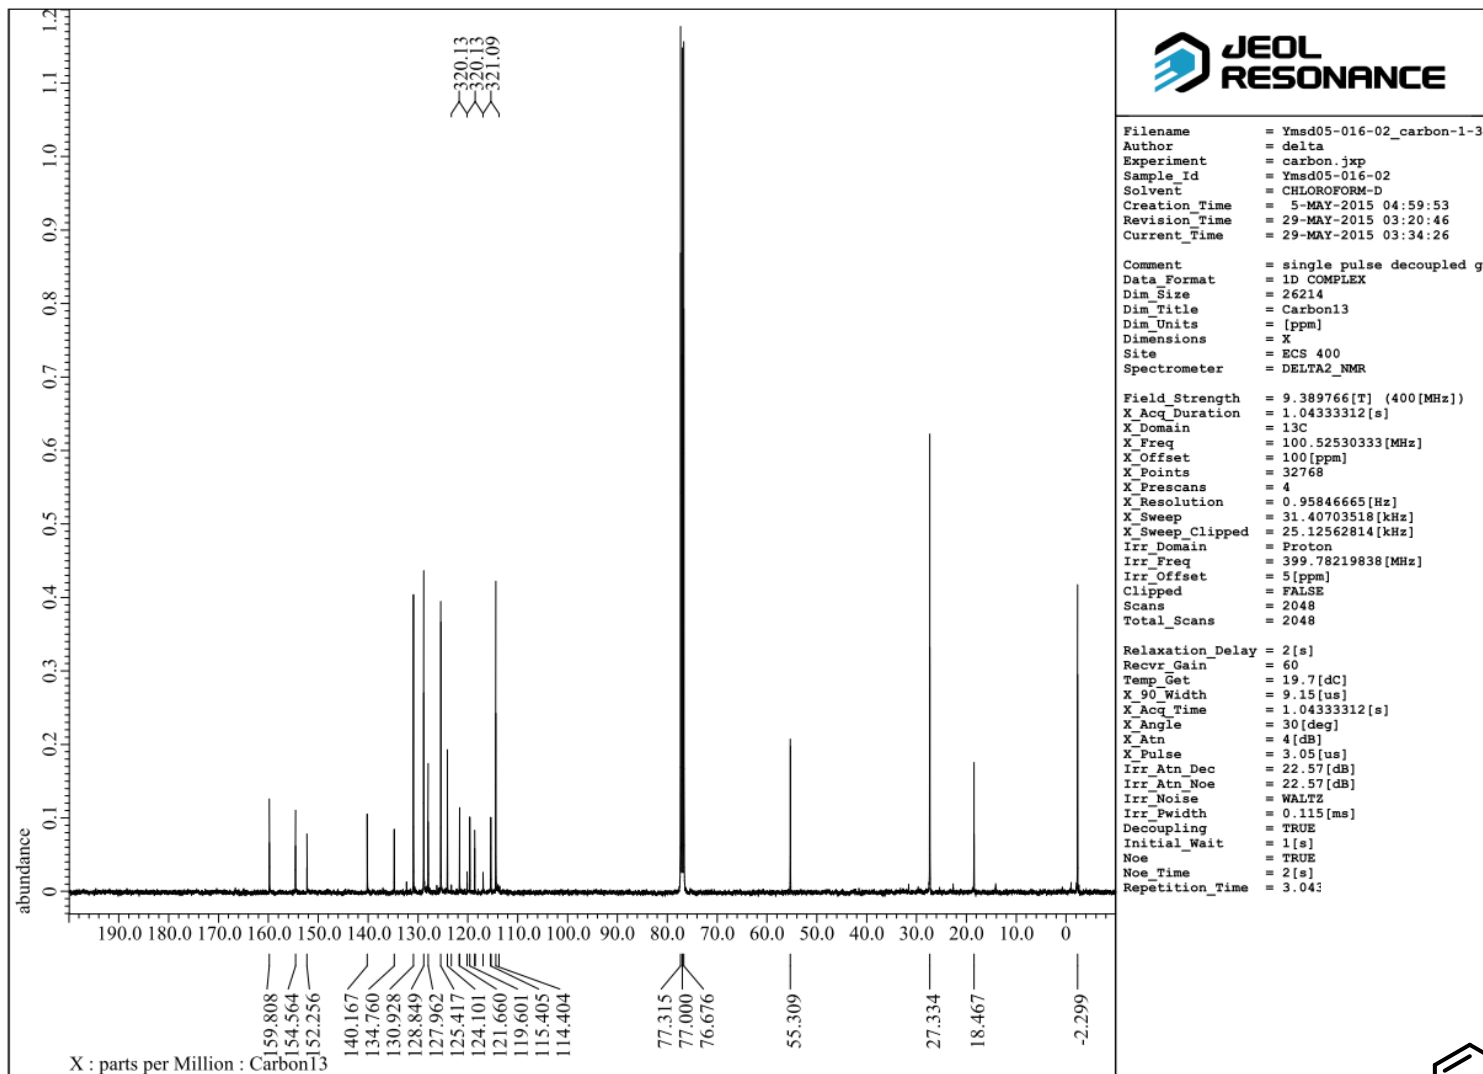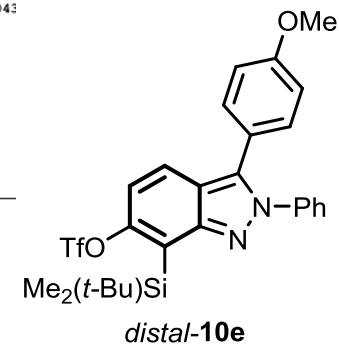

You created this PDF from an application that is not licensed to print to novaPDF printer (<http://www.novapdf.com>)

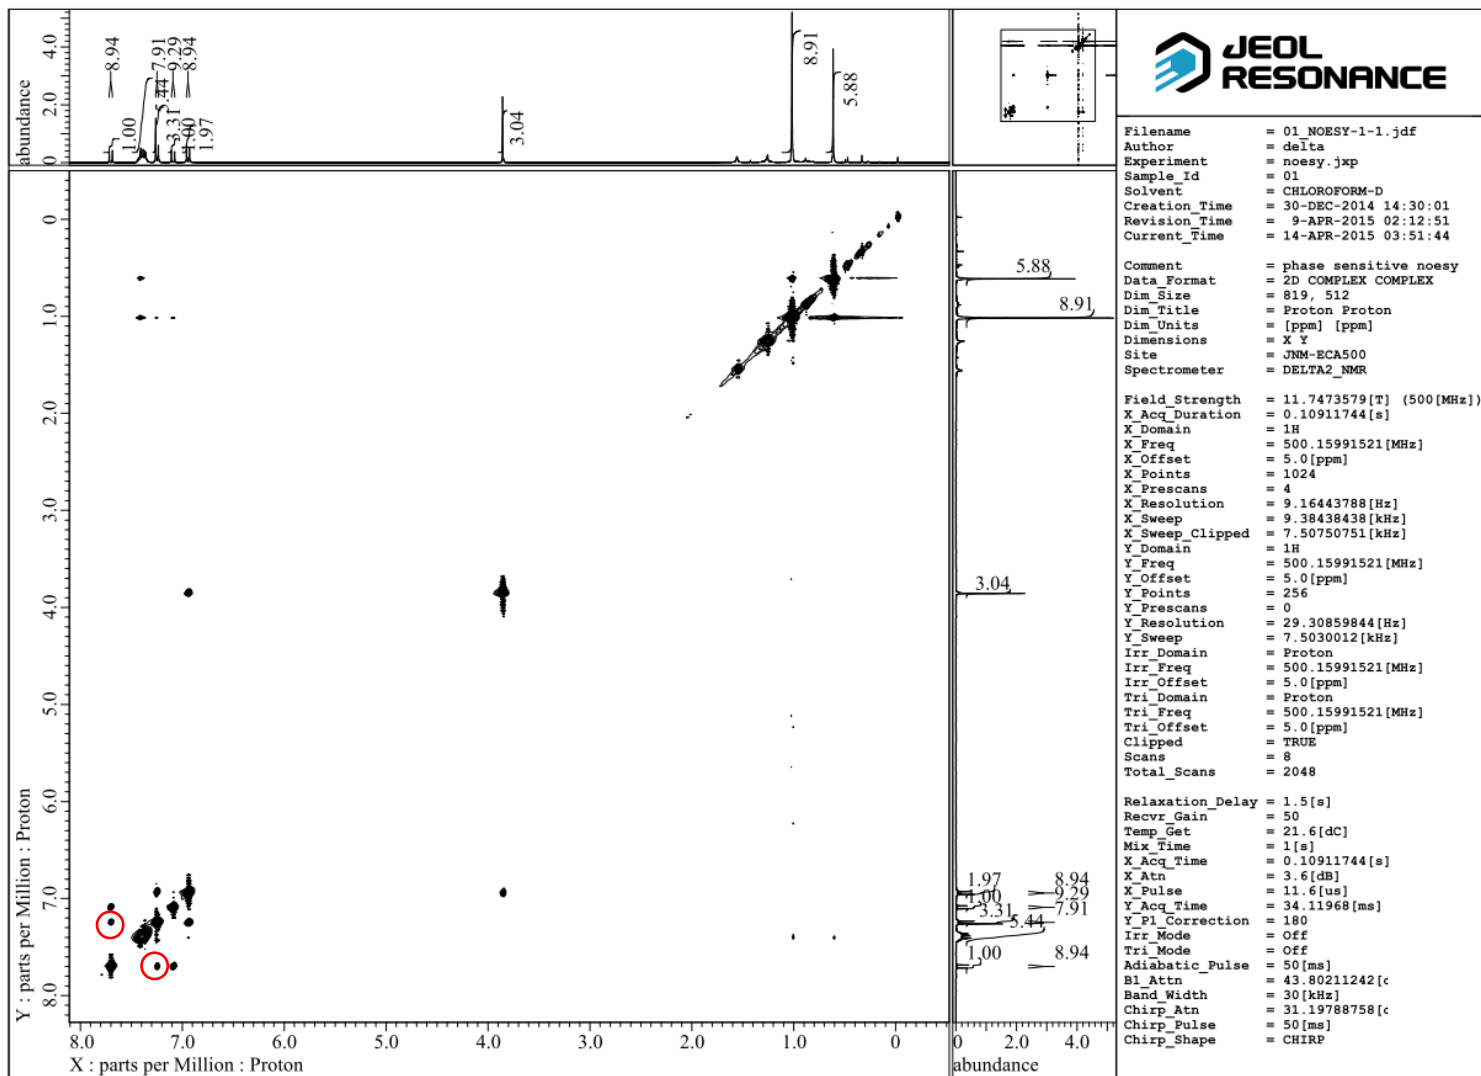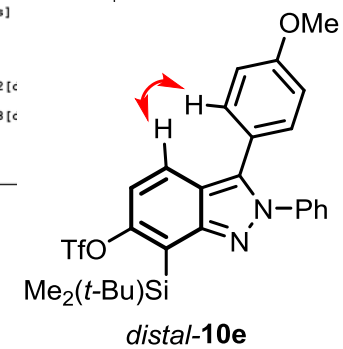

You created this PDF from an application that is not licensed to print to novaPDF printer (<http://www.novapdf.com>)

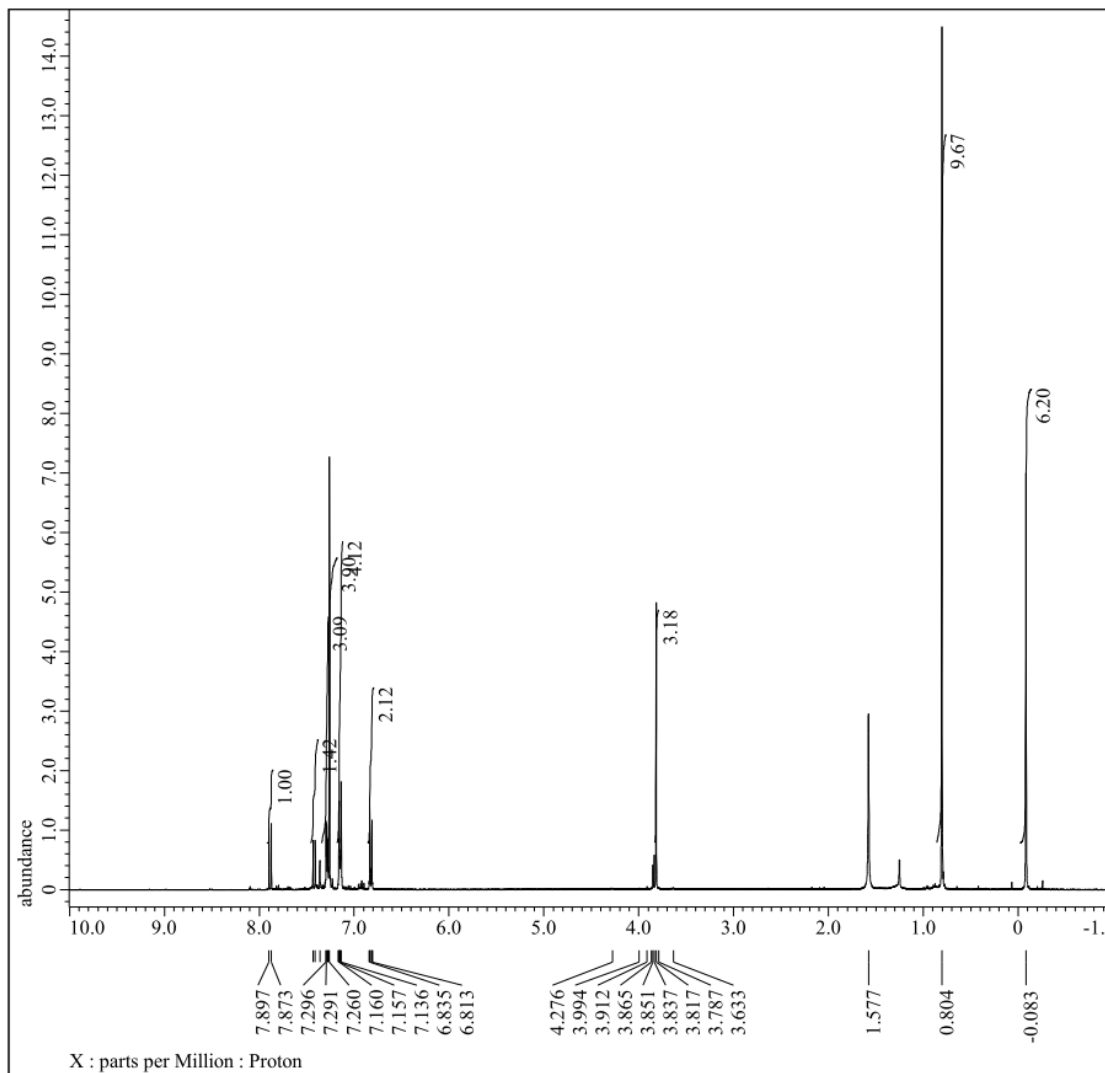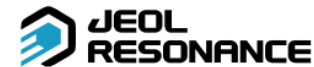

```

Filename      = Ymsd05-142-06minor_prot
Author       = delta
Experiment    = proton_jxp
Sample Id     = Ymsd05-142-06minor
Solvent      = CHLOROFORM-D
Creation_Time = 1-OCT-2015 00:56:24
Revision_Time = 2-NOV-2015 16:58:11
Current_Time  = 2-NOV-2015 16:58:31

Comment      = single_pulse
Data Format   = 1D COMPLEX
Dim Size     = 13107
Dim Title    = Proton
Dim Units    = [ppm]
Dimensions   = X
Site         = ECS 400
Spectrometer = DELTA2_NMR

Field_Strength = 9.389766[T] (400[MHz])
X_Acq_Duration = 2.18365952[s]
X_Domain       = 1H
X_Freq        = 399.78219838 [MHz]
X_Offset      = 5[ppm]
X_Points      = 16384
X_Prescans    = 1
X_Resolution  = 0.45794685 [Hz]
X_Sweep       = 7.5030012 [kHz]
X_Sweep_Clipped = 6.00240096 [kHz]
Irr_Domain    = Proton
Irr_Freq      = 399.78219838 [MHz]
Irr_Offset    = 5[ppm]
Tri_Domain    = Proton
Tri_Freq      = 399.78219838 [MHz]
Tri_Offset    = 5[ppm]
Clipped       = FALSE
Scans         = 16
Total_Scans   = 16

Relaxation_Delay = 2[s]
Recvr_Gain       = 48
Temp_Get        = 19.9 [dC]
X_90_Width      = 11.27 [us]
X_Acq_Time      = 2.18365952 [s]
X_Angle         = 45 [deg]
X_Atn           = 2.4 [dB]
X_Pulse         = 5.635 [us]
Irr_Mode        = Off
Tri_Mode        = Off
Dante_Presat    = FALSE
Initial_Wait    = 1[s]
Repetition_Time = 4.18365952 [s]

```

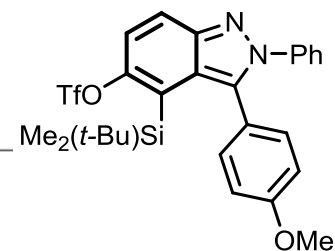

proximal-10e

You created this PDF from an application that is not licensed to print to novaPDF printer (<http://www.novapdf.com>)

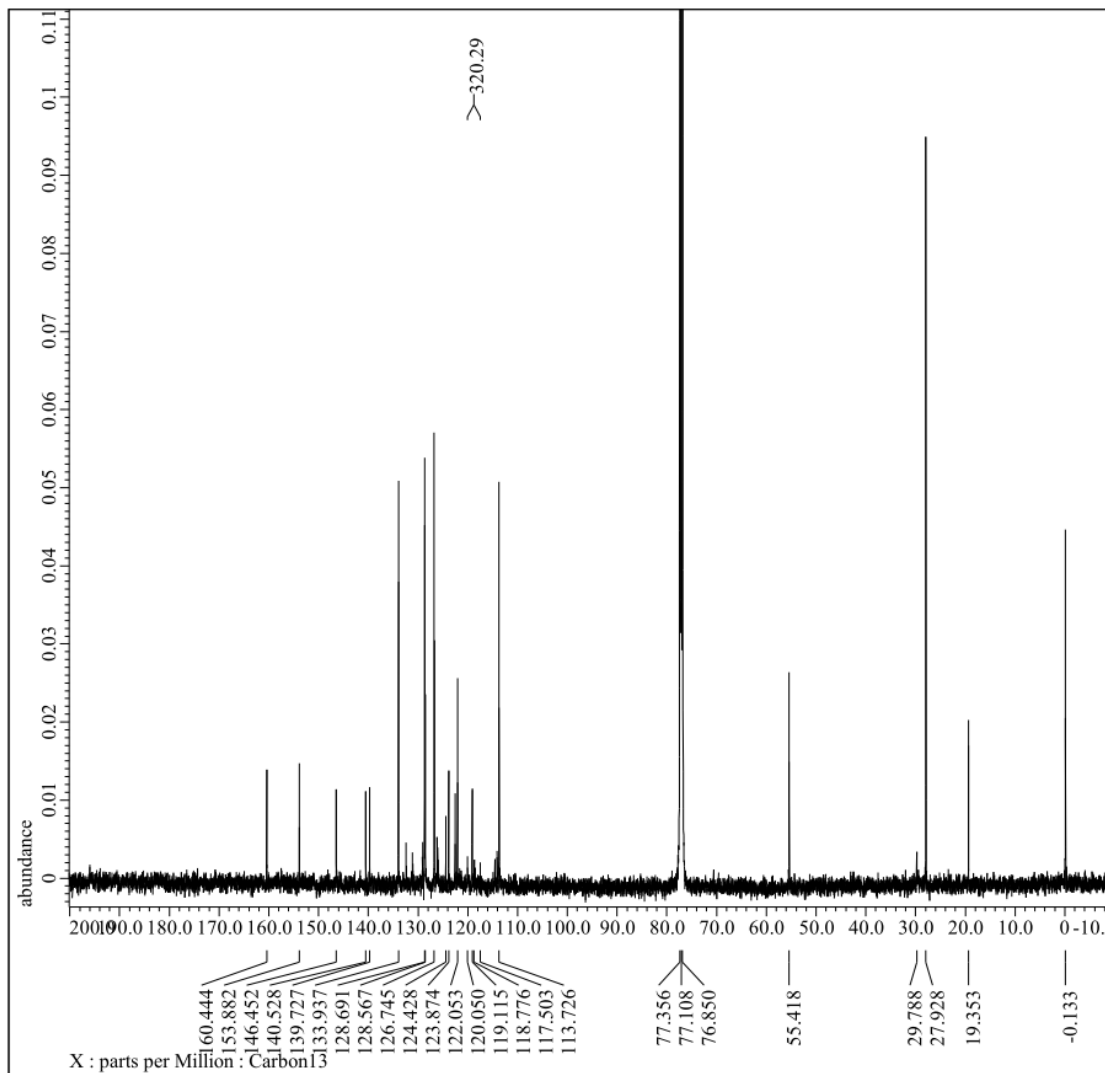

```

Filename      = Ymsd05-142-minor_Carbon-
Author       = delta
Experiment   = carbon_jxp
Sample Id    = Ymsd05-142-minor
Solvent      = CHLOROFORM-D
Creation_Time = 2-OCT-2015 00:15:36
Revision_Time = 30-OCT-2015 02:41:55
Current_Time  = 2-NOV-2015 17:00:27

Comment      = single pulse decoupled g
Data Format   = 1D COMPLEX
Dim Size     = 26214
Dim Title    = Carbon13
Dim Units    = [ppm]
Dimensions   = X
Site         = JNM-ECA500
Spectrometer = DELTA2_NMR

Field_Strength = 11.7473579[T] (500[MHz])
X_Acq_Duration = 0.83361792[s]
X_Domain      = 13C
X_Freq        = 125.76529768 [MHz]
X_Offset      = 100[ppm]
X_Points      = 32768
X_Prescans    = 4
X_Resolution  = 1.19959034 [Hz]
X_Sweep       = 39.3081761 [kHz]
X_Sweep_Clip  = 31.44654088 [kHz]
Irr_Domain    = Proton
Irr_Freq      = 500.15991521 [MHz]
Irr_Offset    = 5.0 [ppm]
Clipped       = FALSE
Scans         = 11000
Total_Scans   = 11000

Relaxation_Delay = 2[s]
Recvr_Gain      = 58
Temp_Get        = 20.8[dC]
X_90_Width     = 9.6[us]
X_Acq_Time     = 0.83361792[s]
X_Angle        = 30[deg]
X_Atn          = 4.1[dB]
X_Pulse        = 3.2[us]
Irr_Atn_Dec    = 21.587[dB]
Irr_Atn_Noise = 21.587[dB]
Irr_Noise      = WALTZ
Irr_Pwidth     = 92[us]
Decoupling     = TRUE
Initial_Wait   = 1[s]
Noe            = TRUE
Noe_Time       = 2[s]
Repetition_Time = 2.83361792[s]

```

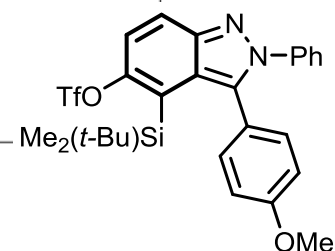

proximal-10e

You created this PDF from an application that is not licensed to print to novaPDF printer (<http://www.novapdf.com>)



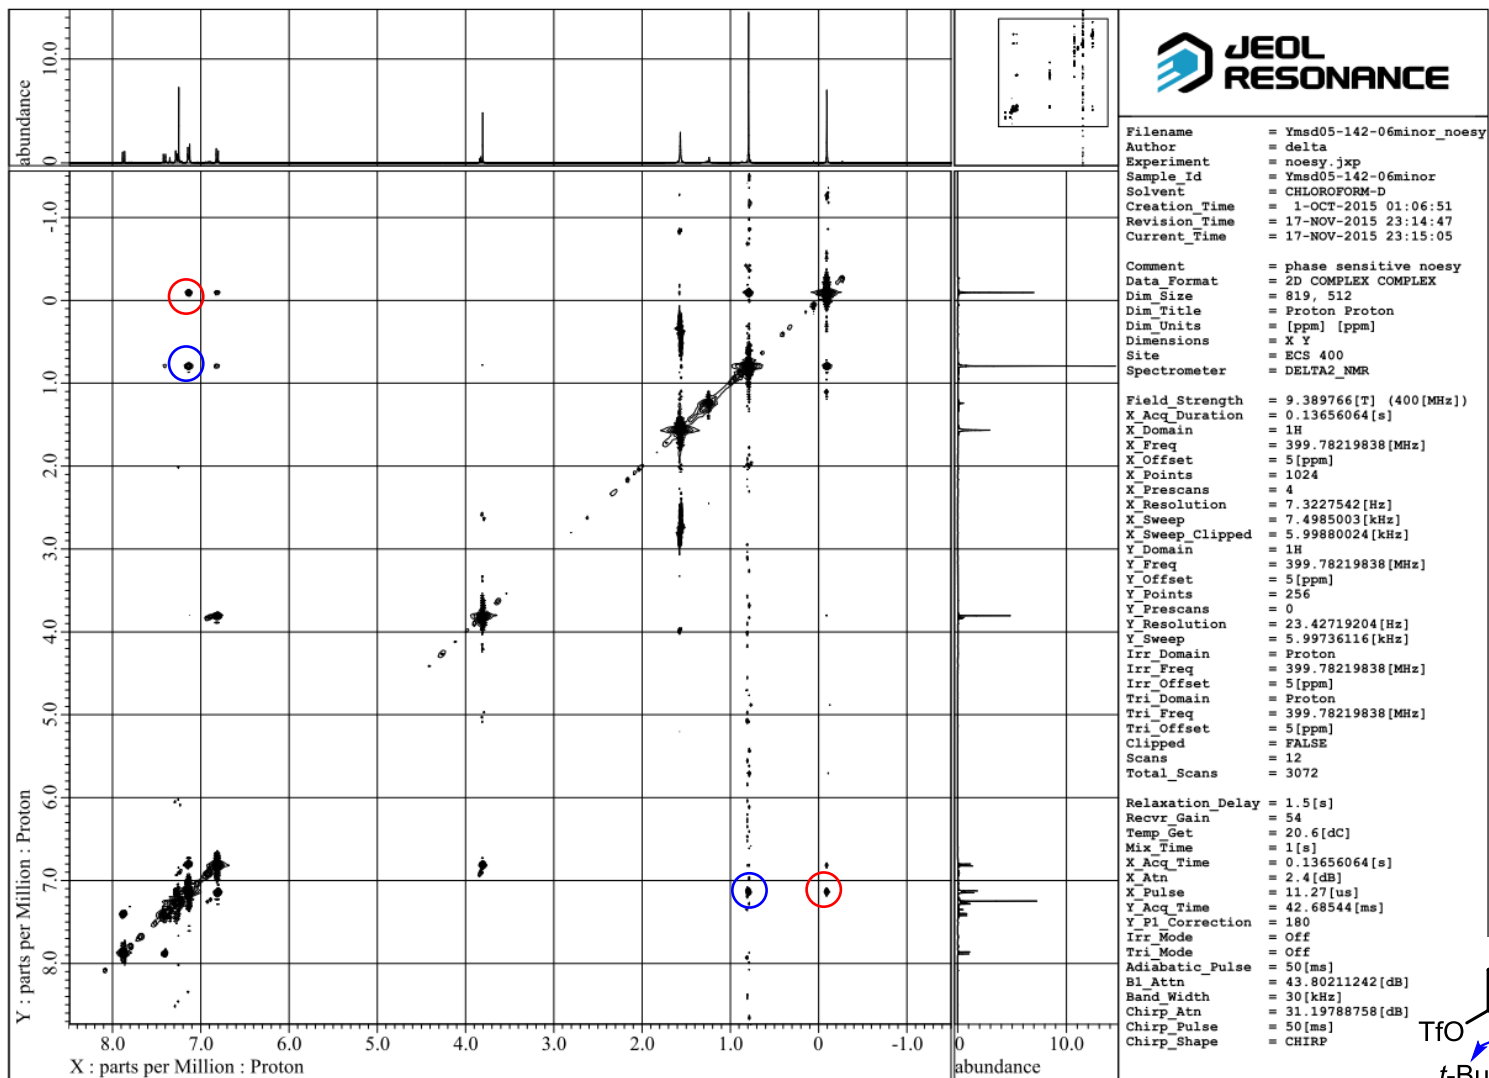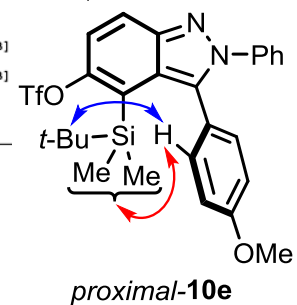

You created this PDF from an application that is not licensed to print to novaPDF printer (<http://www.novapdf.com>)

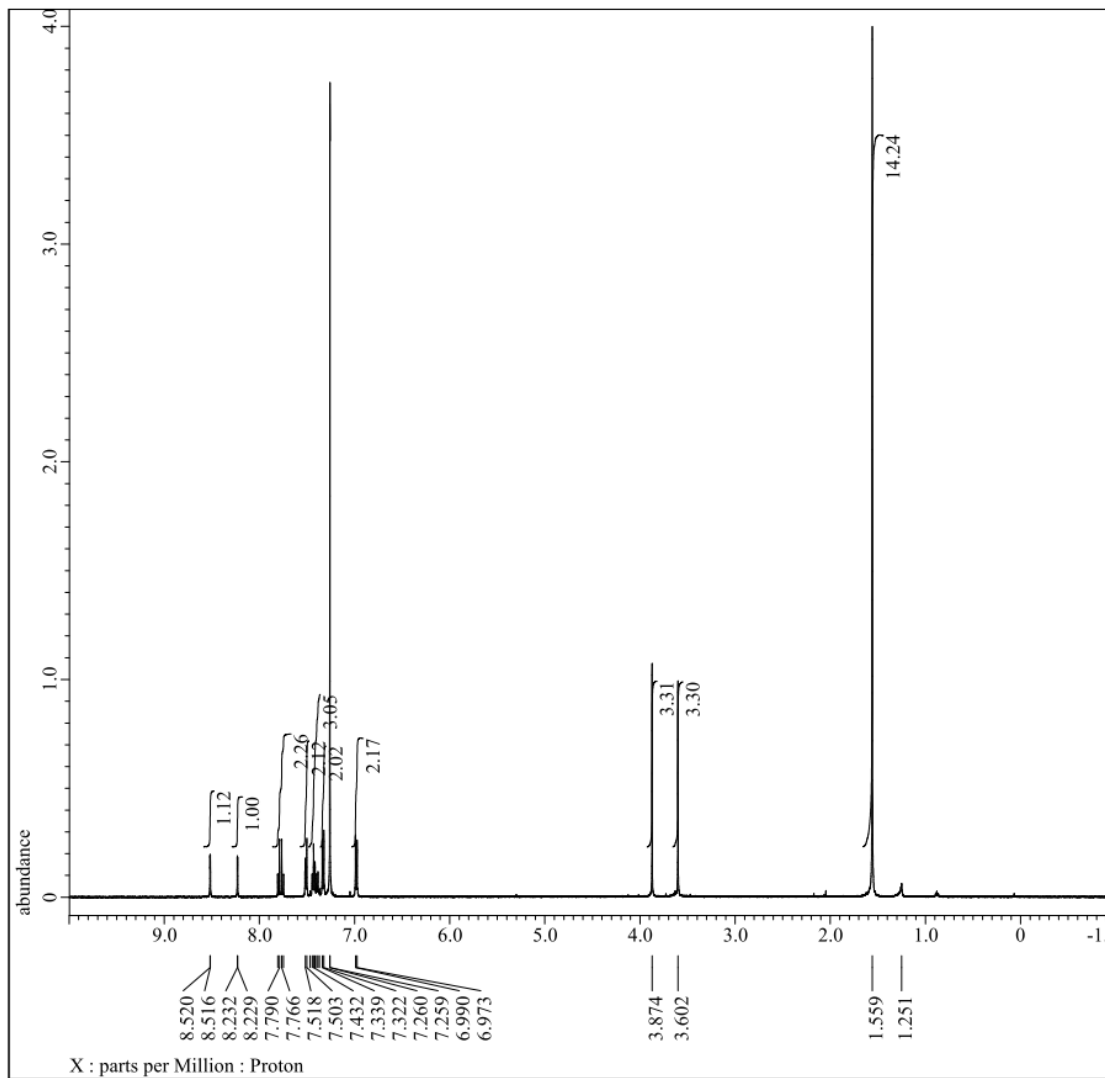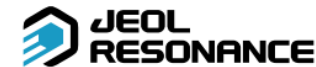

```

Filename      = Ymsd05-031-07_proton-1-5
Author       = delta
Experiment   = proton_jxp
Sample_id    = Ymsd05-031-07
Solvent      = CHLOROFORM-D
Creation_Time = 27-MAY-2015 00:36:46
Revision_Time = 9-JUN-2015 15:37:05
Current_Time  = 9-JUN-2015 15:37:29

Comment      = single pulse
Data Format   = 1D COMPLEX
Dim Size     = 26214
Dim Title    = Proton
Dim Units    = [ppm]
Dimensions   = X
Site         = JNM-ECA500
Spectrometer = DELTA2_NMR

Field Strength = 11.7473579[T] (500[MHz])
X_Acq_Duration = 3.49175808[s]
X_Domain      = 1H
X_Freq        = 500.15991521[MHz]
X_Offset      = 5.0[ppm]
X_Points      = 32768
X_Prescans    = 1
X_Resolution  = 0.28638868 [Hz]
X_Sweep       = 9.38438438 [kHz]
X_Sweep_Clipped = 7.50750751 [kHz]
Irr_Domain    = Proton
Irr_Freq      = 500.15991521[MHz]
Irr_Offset    = 5.0[ppm]
Tri_Domain    = Proton
Tri_Freq      = 500.15991521[MHz]
Tri_Offset    = 5.0[ppm]
Clipped       = FALSE
Scans         = 8
Total_Scans   = 8

Relaxation_Delay = 2[s]
Recvr_Gain       = 54
Temp_Get        = 19.1[dC]
X_90_Width      = 11.6[us]
X_Acq_Time      = 3.49175808[s]
X_Angle         = 45[deg]
X_Atn           = 3.6[dB]
X_Pulse         = 5.8[us]
Irr_Mode        = Off
Tri_Mode        = Off
Dante_Preset    = FALSE
Initial_Wait    = 1[s]
Repetition_Time = 5.49175808[s]
  
```

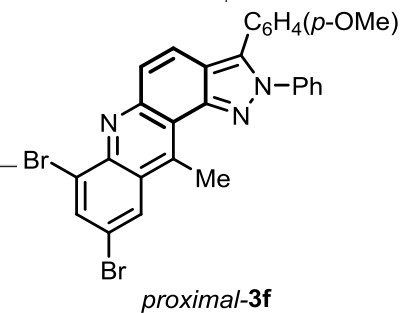

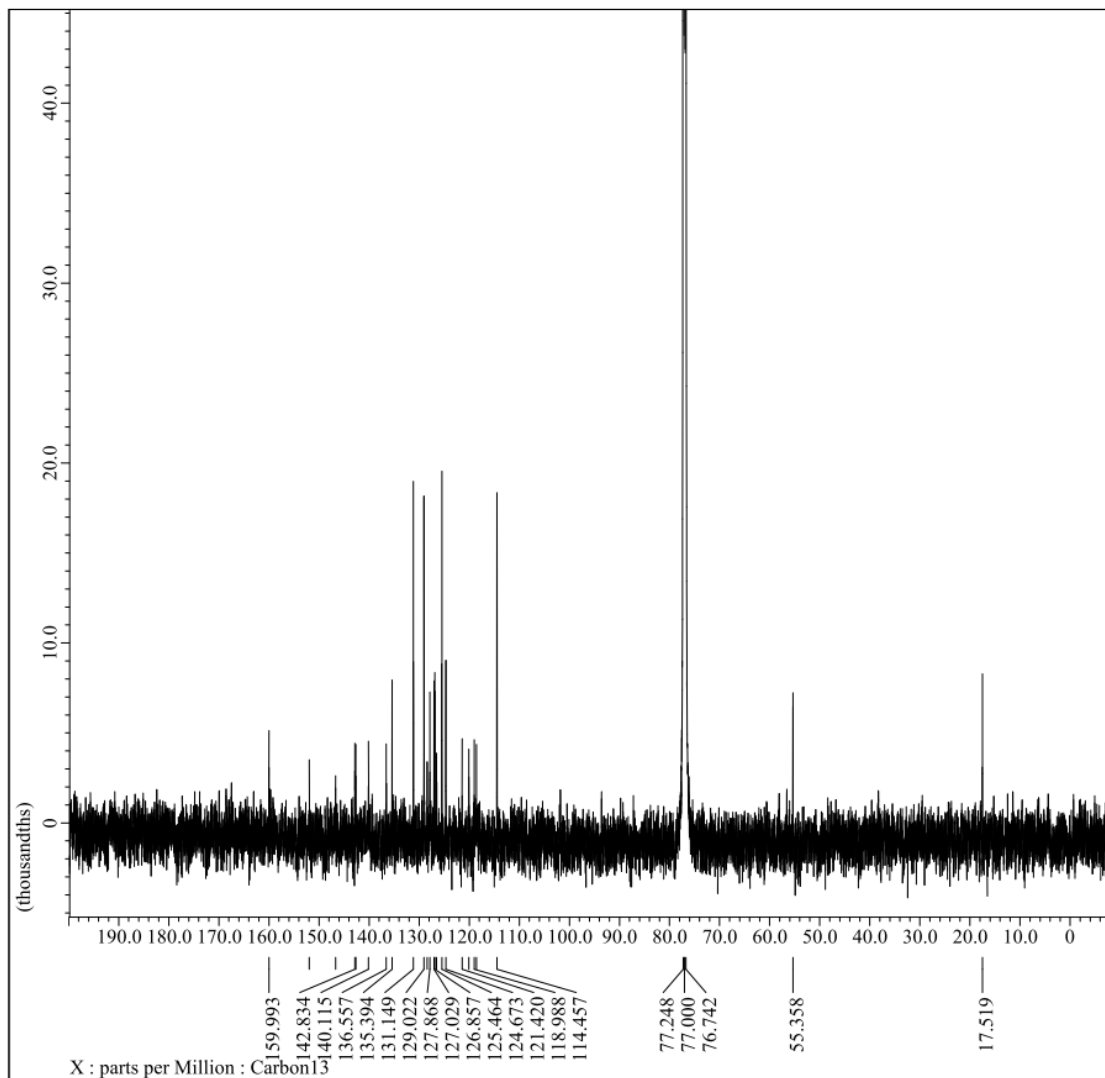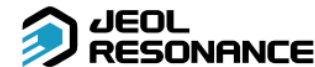

```

Filename      = Ymsd05-031-07_Carbon-1-4
Author       = delta
Experiment   = carbon_jxp
Sample_Id    = Ymsd05-031-07
Solvent      = CHLOROFORM-D
Creation_Time = 27-MAY-2015 00:39:52
Revision_Time = 29-MAY-2015 22:45:12
Current_Time  = 29-MAY-2015 22:46:14

Comment      = single pulse decoupled g
Data Format   = 1D COMPLEX
Dim_Size     = 26214
Dim_Title    = Carbon13
Dim_Units    = [ppm]
Dimensions   = X
Site         = JNM-ECA500
Spectrometer = DELTA2_NMR

Field Strength = 11.7473579[T] (500[MHz])
X_Acq_Duration = 0.83361792[s]
X_Domain       = 13C
X_Freq         = 125.76529768[MHz]
X_Offset       = 100[ppm]
X_Points       = 32768
X_Prescans     = 4
X_Resolution   = 1.19959034[Hz]
X_Sweep        = 39.3081761[kHz]
X_Sweep_Clipped = 31.44654088[kHz]
Irr_Domain     = Proton
Irr_Freq       = 500.15991521[MHz]
Irr_Offset     = 5.0[ppm]
Clipped       = FALSE
Scans          = 10000
Total_Scans    = 10000

Relaxation_Delay = 2[s]
Recvr_Gain       = 60
Temp_Get         = 20.1[dC]
X_90_Width      = 9.6[us]
X_Acq_Time      = 0.83361792[s]
X_Angle         = 30[deg]
X_Atn           = 4.1[dB]
X_Pulse         = 3.2[us]
Irr_Atn_Dec     = 21.587[dB]
Irr_Atn_No     = 21.587[dB]
Irr_Noise       = WALTZ
Irr_Width       = 92[us]
Decoupling      = TRUE
Initial_Wait    = 1[s]
Noe              = TRUE
Noe_Time        = 2[s]
Repetition_Time = 2.83361792[s]

```

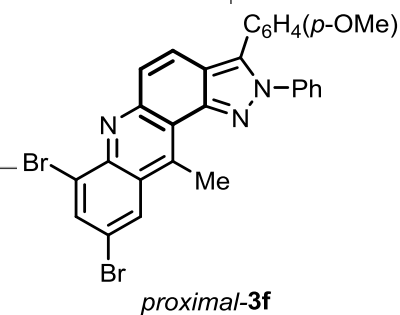

Ymsd05-031-06

exp518 TOCSY

| SAMPLE         |            | FLAGS         |          |
|----------------|------------|---------------|----------|
| date           | Jun 5 2015 | hs            | nn       |
| solvent        | cdcl3      | sspul         | y        |
| sample         |            | PFGflg        | y        |
| ACQUISITION    |            | hsglvl        | 5760     |
| sw             | 9615.4     | SPECIAL       |          |
| at             | 0.150      | temp          | 30.0     |
| np             | 2884       | gain          | 48       |
| fb             | 4000       | spin          | not used |
| ss             | 32         | F2 PROCESSING |          |
| d1             | 1.000      | gf            | 0.034    |
| nt             | 32         | gfs           | not used |
| 2D ACQUISITION |            | fn            | 4096     |
| sw1            | 9615.4     | F1 PROCESSING |          |
| ni             | 256        | gf1           | 0.015    |
| TRANSMITTER    |            | gfs1          | not used |
| tn             | H1         | procl         | lp       |
| sfrq           | 599.927    | fn1           | 4096     |
| tof            | 600.0      | DISPLAY       |          |
| tpwr           | 55         | sp            | 4118.7   |
| pw             | 7.350      | wp            | 986.0    |
| TOCSY          |            | sp1           | 4090.6   |
| mix            | undefined  | wp1           | 1070.5   |
| slpw           | undefined  | rf1           | 1243.0   |
| slpwr          | undefined  | rfp           | 0        |
| trim           | 0.0020     | rf11          | 1243.0   |
| PRESATURATION  |            | rfp1          | 0        |
| satmode        | n          | PLOT          |          |
| wet            | n          | wc            | 107.2    |
| DECOUPLER      |            | sc            | 6.7      |
| dn             | C13        | wc2           | 134.2    |
| dm             | nnn        | sc2           | 0        |
|                |            | vs            | 6024     |
|                |            | th            | 2        |
|                |            | ai            | cdc ph   |

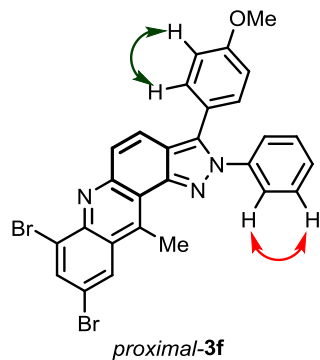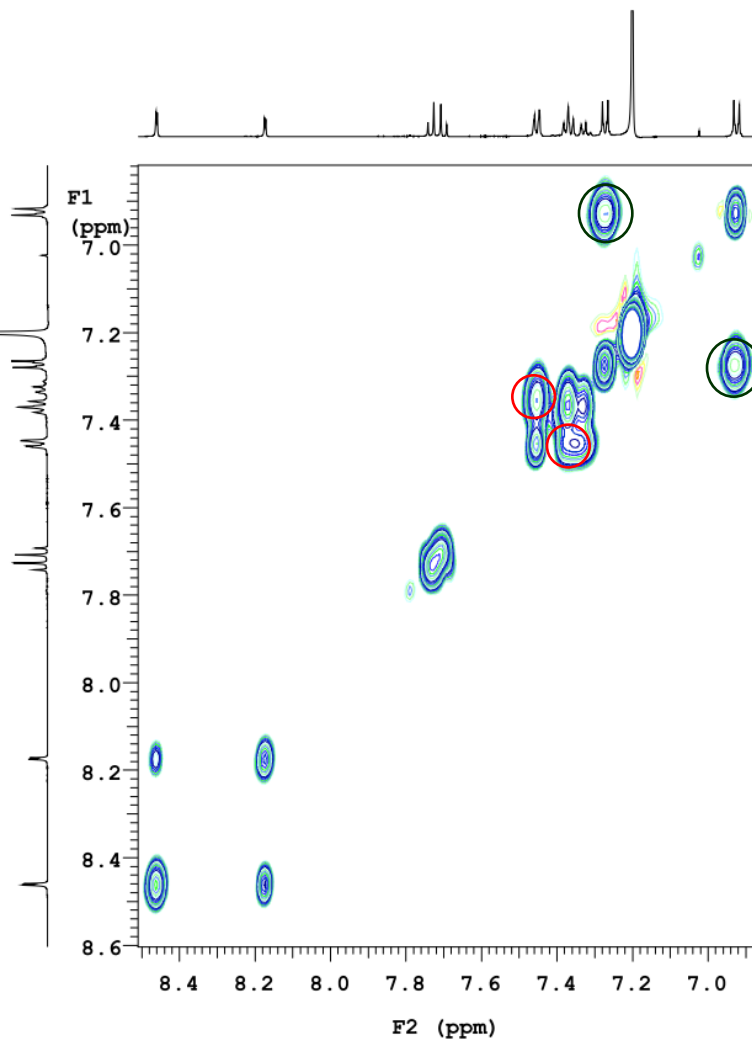

Ymsd05-031-06

exp519 ROESYAD

| SAMPLE         |            | FLAGS         |          |
|----------------|------------|---------------|----------|
| date           | Jun 5 2015 | hs            | nn       |
| solvent        | cdc13      | sspul         | Y        |
| sample         |            | PFGflg        | Y        |
| ACQUISITION    |            | hsglvl        | 5760     |
| sw             | 9615.4     | SPECIAL       |          |
| at             | 0.150      | temp          | 30.0     |
| np             | 2884       | gain          | 48       |
| fb             | 4000       | spin          | not used |
| ss             | 32         | F2 PROCESSING |          |
| d1             | 1.000      | gf            | 0.033    |
| nt             | 64         | gfs           | not used |
| 2D ACQUISITION |            | fn            | 4096     |
| sw1            | 9615.4     | F1 PROCESSING |          |
| ni             | 256        | gf1           | 0.012    |
| TRANSMITTER    |            | gfs1          | not used |
| tn             | H1         | procl         | lp       |
| sfrq           | 599.927    | fn1           | 4096     |
| tof            | 600.0      | DISPLAY       |          |
| tpwr           | 55         | sp            | 1851.0   |
| pw             | 7.350      | wp            | 2878.0   |
| TOCSY          |            | sp1           | 1851.0   |
| mixR           | 0.200      | wpl           | 2878.0   |
| slpwR          | 43         | rfl           | 1243.0   |
| slpwR          | 32.426     | rfp           | 0        |
| trim           | 0.0020     | rfl1          | 1243.0   |
| PRESATURATION  |            | rfpl          | 0        |
| satmode        | n          | PLOT          |          |
| wet            | n          | wc            | 107.2    |
| DECOUPLER      |            | sc            | 6.7      |
| dn             | C13        | wc2           | 134.2    |
| dm             | nnn        | sc2           | 0        |
|                |            | vs            | 70955    |
|                |            | th            | 1        |
|                |            | ai            | ph       |

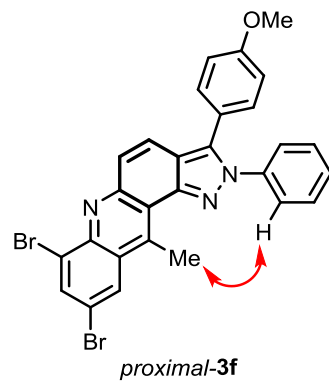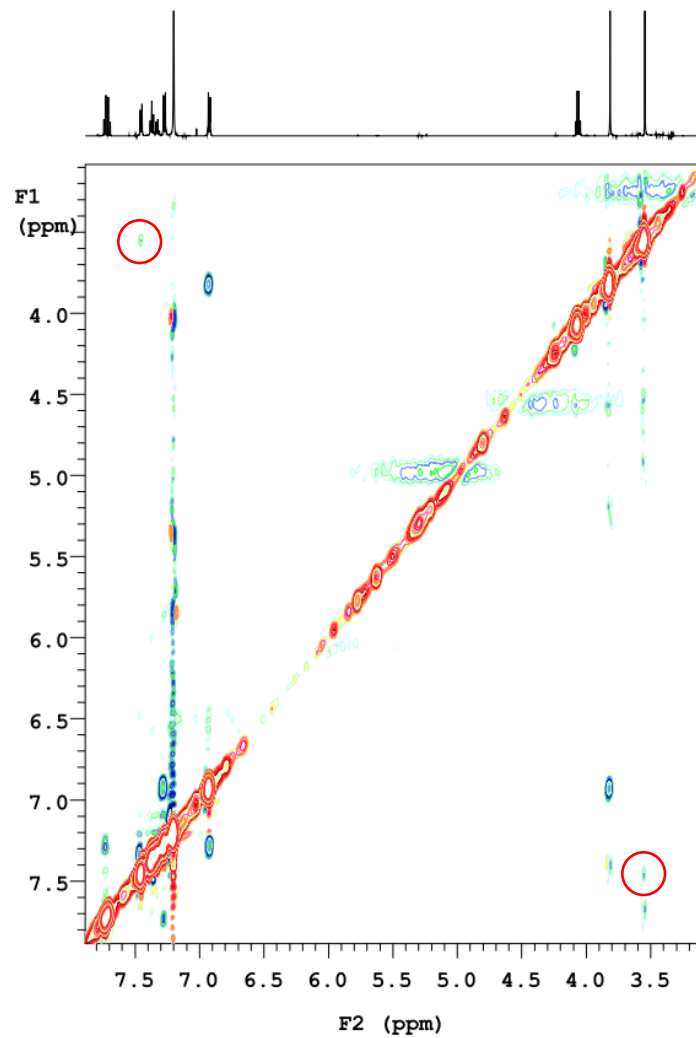

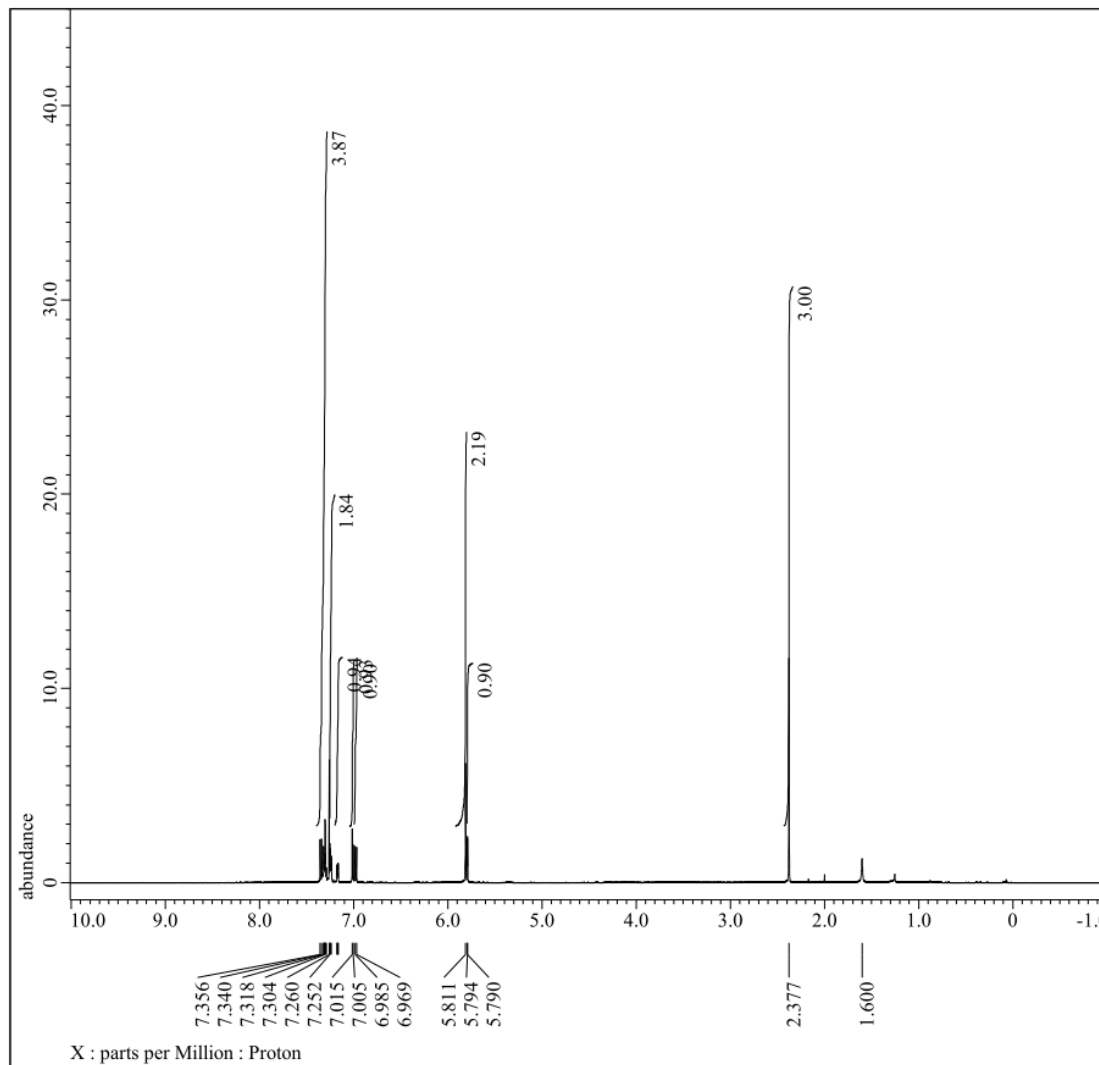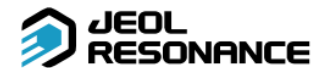

```

Filename      = Ymsd06-073-05a_proton-1-
Author        = delta
Experiment    = proton_jxp
Sample_Id     = Ymsd06-073-05a
Solvent       = CHLOROFORM-D
Creation_Time = 26-DEC-2015 00:31:09
Revision_Time = 27-DEC-2015 21:06:13
Current_Time  = 27-DEC-2015 21:08:18

Comment       = single_pulse
Data_Format   = 1D_COMPLEX
Dim_Size      = 13107
Dim_Title     = Proton
Dim_Units     = [ppm]
Dimensions    = X
Site          = JNM-ECA500
Spectrometer  = DELTA2_NMR

Field Strength = 11.7473579 [T] (500 [MHz])
X_Acq_Duration = 1.74587904 [s]
X_Domain       = 1H
X_Freq         = 500.15991521 [MHz]
X_Offset       = 5.0 [ppm]
X_Points       = 16384
X_Prescans     = 1
X_Resolution   = 0.57277737 [Hz]
X_Sweep        = 9.38438438 [kHz]
X_Sweep_Clipped = 7.50750751 [kHz]
Irr_Domain     = Proton
Irr_Freq       = 500.15991521 [MHz]
Irr_Offset     = 5.0 [ppm]
Tri_Domain     = Proton
Tri_Freq       = 500.15991521 [MHz]
Tri_Offset     = 5.0 [ppm]
Clipped        = FALSE
Scans          = 16
Total_Scans    = 16

Relaxation_Delay = 2 [s]
Recvr_Gain       = 48
Temp_Get         = 21.7 [dC]
X_90_Width      = 11.6 [us]
X_Acq_Time      = 1.74587904 [s]
X_Angle         = 45 [deg]
X_Atn           = 3.6 [dB]
X_Pulse         = 5.8 [us]
Irr_Mode        = Off
Tri_Mode        = Off
Dante_Preset    = FALSE
Initial_Wait    = 1 [s]
Repetition_Time = 3.74587904 [s]

```

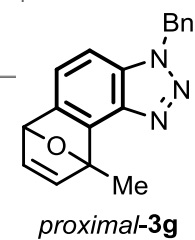

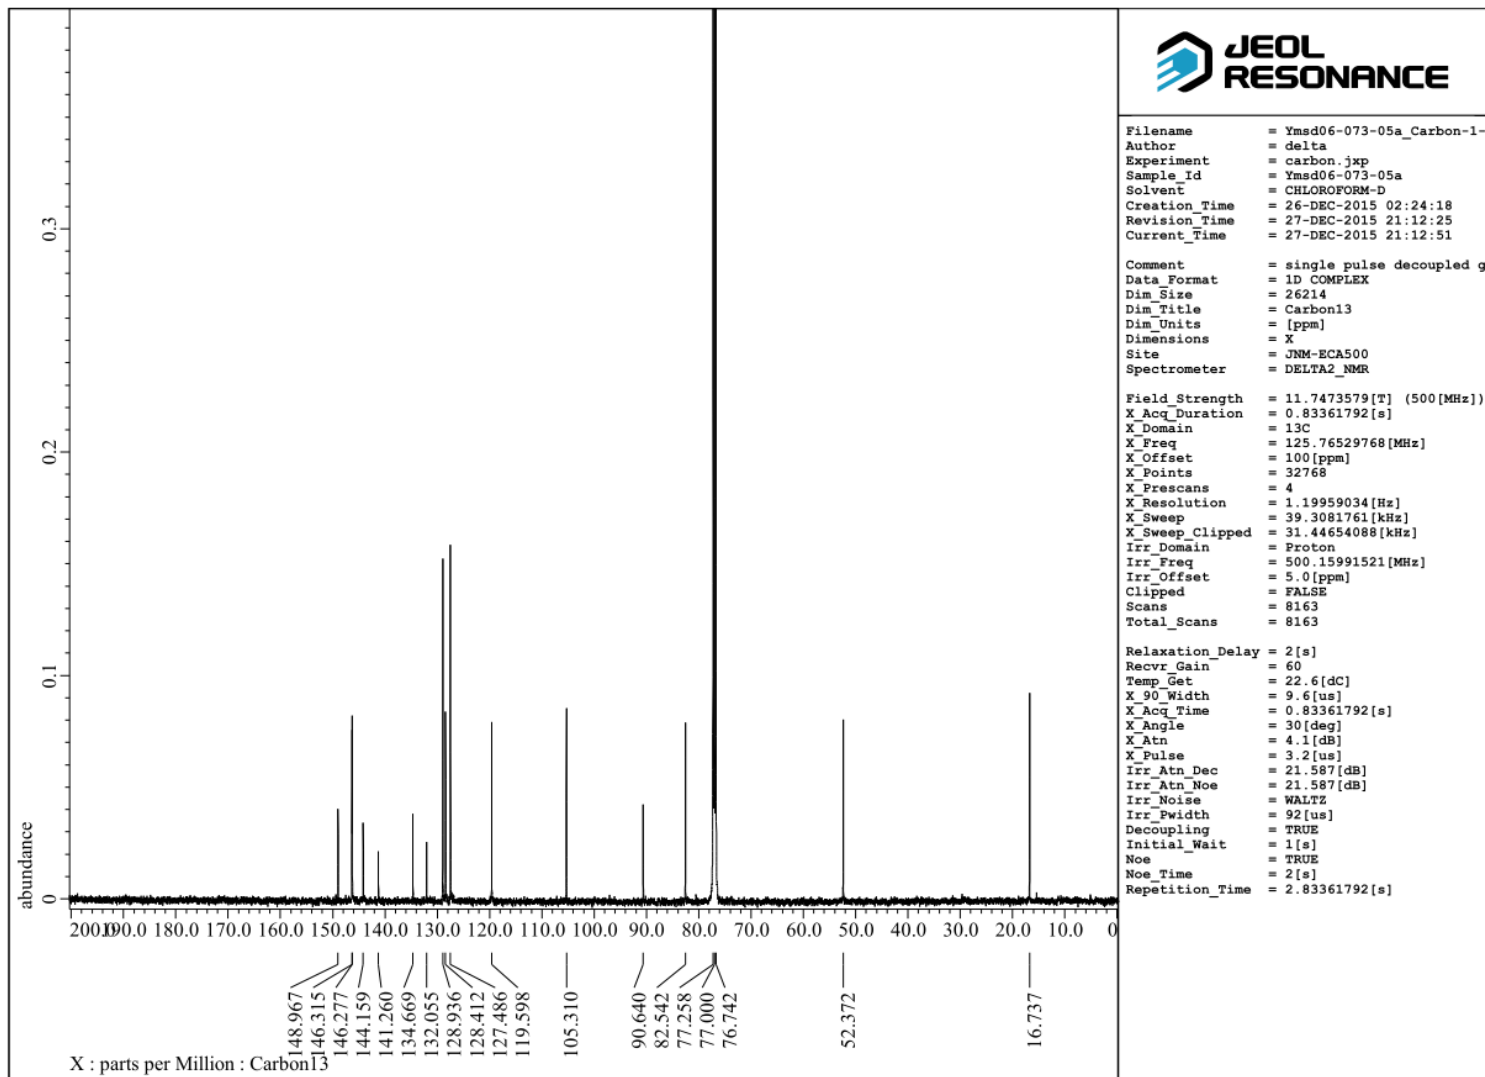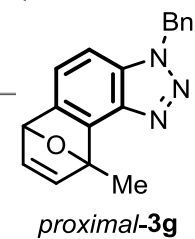

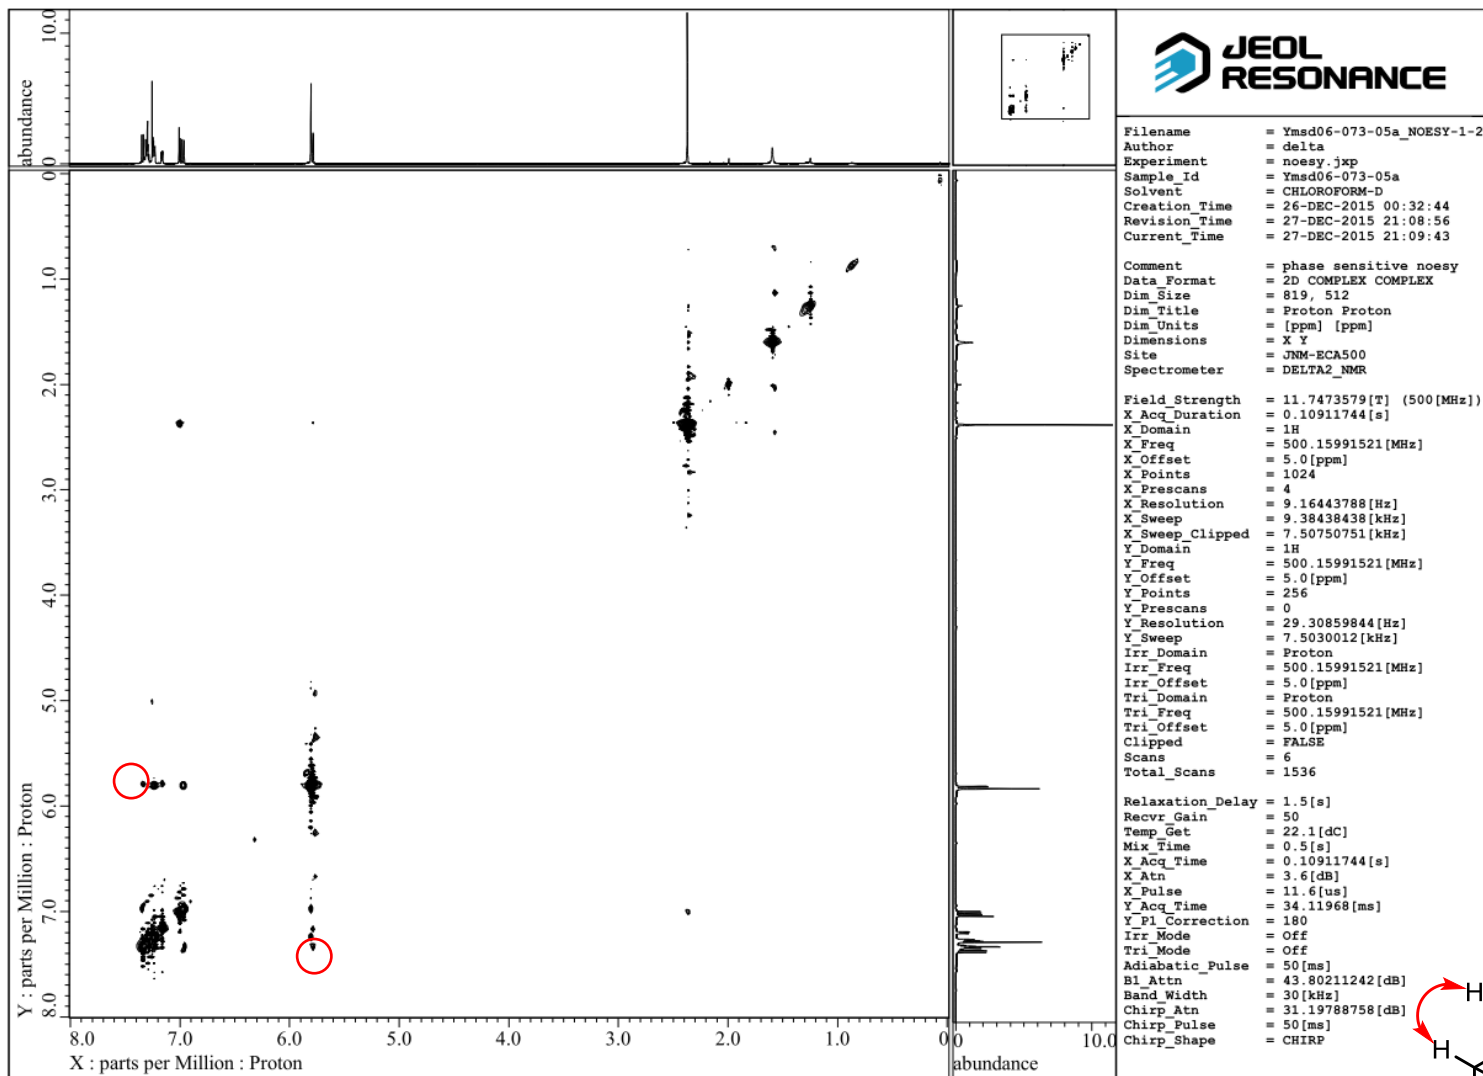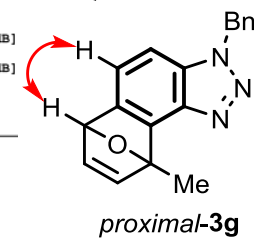



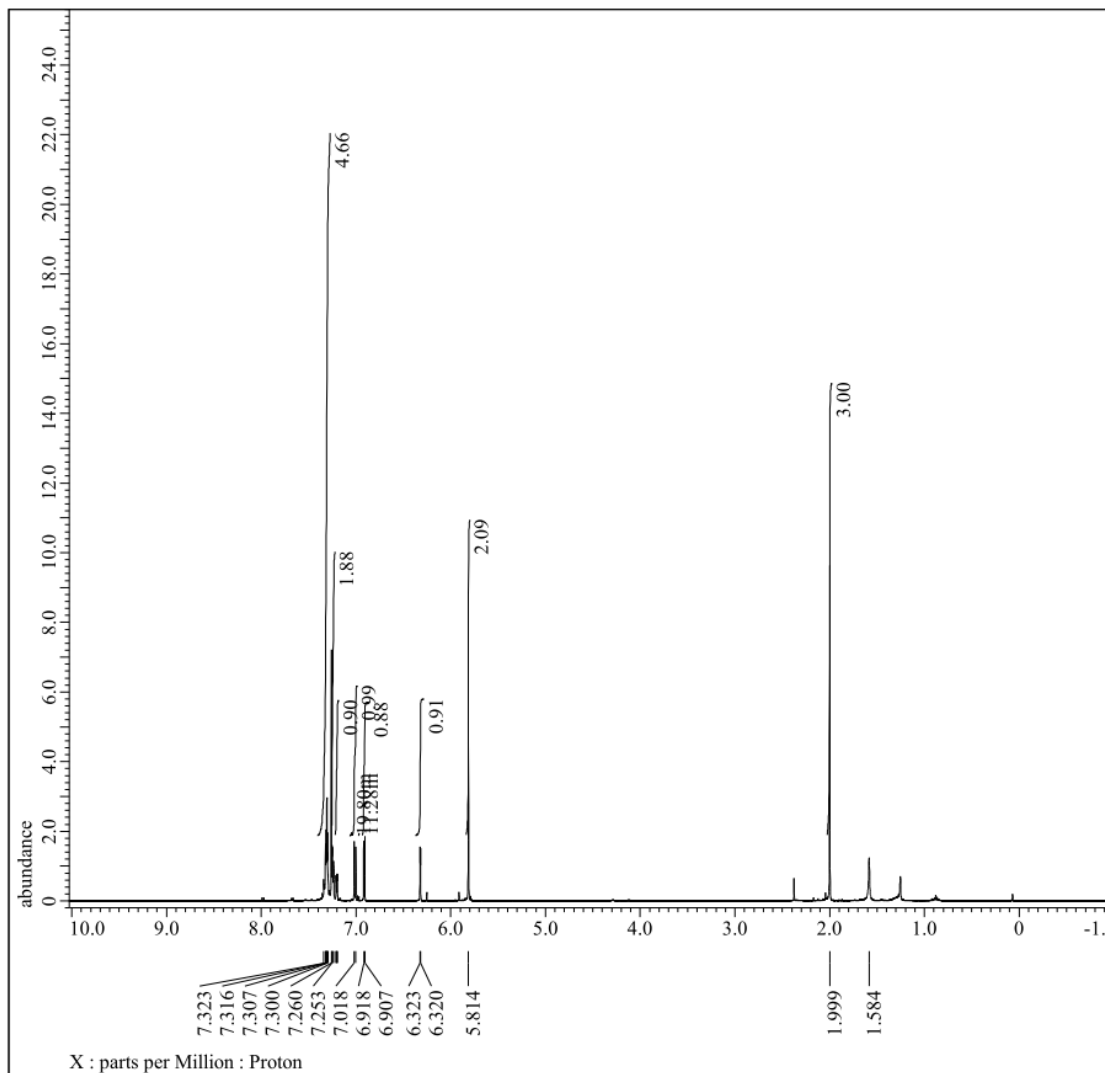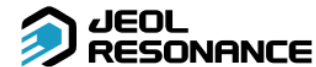

```

Filename      = Ymsd06-073-05b_proton-1-
Author       = delta
Experiment   = proton.jxp
Sample Id    = Ymsd06-073-05b
Solvent      = CHLOROFORM-D
Creation_Time = 26-DEC-2015 11:02:45
Revision_Time = 27-DEC-2015 20:52:47
Current_Time  = 27-DEC-2015 20:53:45

Comment      = single pulse
Data Format   = 1D COMPLEX
Dim Size     = 13107
Dim Title    = Proton
Dim Units    = [ppm]
Dimensions   = X
Site         = JNM-ECA500
Spectrometer = DELTA2_NMR

Field_Strength = 11.7473579[T] (500[MHz])
X_Acq_Duration = 1.74587904[s]
X_Domain       = 1H
X_Freq         = 500.15991521[MHz]
X_Offset       = 5.0[ppm]
X_Points      = 16384
X_Prescans    = 1
X_Resolution  = 0.57277737 [Hz]
X_Sweep       = 9.38438438 [kHz]
X_Sweep_Clipped = 7.50750751 [kHz]
Irr_Domain    = Proton
Irr_Freq      = 500.15991521[MHz]
Irr_Offset    = 5.0[ppm]
Tri_Domain    = Proton
Tri_Freq      = 500.15991521[MHz]
Tri_Offset    = 5.0[ppm]
Clipped       = FALSE
Scans         = 8
Total_Scans   = 8

Relaxation_Delay = 2[s]
Recvr_Gain       = 50
Temp_Get        = 22.3[dC]
X_90_Width      = 11.6[us]
X_Acq_Time      = 1.74587904[s]
X_Angle         = 45[deg]
X_Atn           = 3.6[db]
X_Pulse         = 5.8[us]
Irr_Mode        = Off
Tri_Mode        = Off
Dante_Presat    = FALSE
Initial_Wait    = 1[s]
Repetition_Time = 3.74587904[s]
  
```

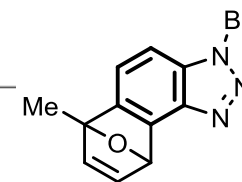

distal-3g

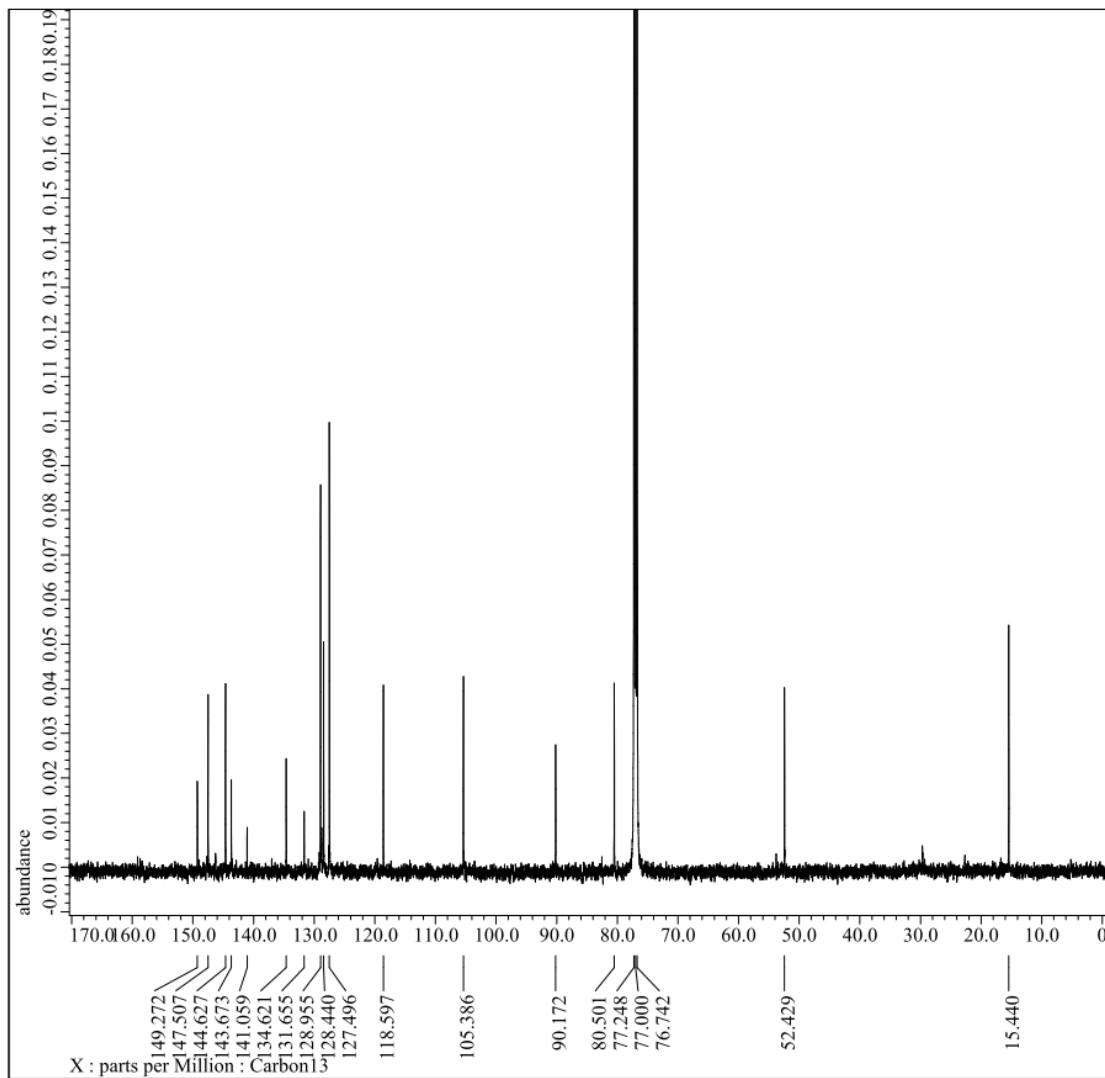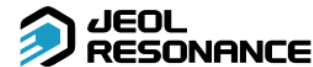

```

Filename      = Ymsd06-073-05b_Carbon-1-
Author       = delta
Experiment   = carbon_jxp
Sample_Id    = Ymsd06-073-05b
Solvent      = CHLOROFORM-D
Creation_Time = 26-DEC-2015 12:19:14
Revision_Time = 28-DEC-2015 15:27:14
Current_Time  = 28-DEC-2015 15:28:07

Comment      = single pulse decoupled g
Data Format   = 1D COMPLEX
Dim Size     = 26214
Dim Title    = Carbon13
Dim Units    = [ppm]
Dimensions   = X
Site         = JNM-ECA500
Spectrometer = DELTA2_NMR

Field Strength = 11.7473579[T] (500[MHz])
X_Acq_Duration = 0.83361792[s]
X_Domain      = 13C
X_Freq        = 125.76529768[MHz]
X_Offset      = 100[ppm]
X_Points      = 32768
X_Prescans    = 4
X_Resolution  = 1.19959034[Hz]
X_Sweep       = 39.3081761[kHz]
X_Sweep_Clipped = 31.44654088[kHz]
Irr_Domain    = Proton
Irr_Freq      = 500.15991521[MHz]
Irr_Offset    = 5.0[ppm]
Clipped       = FALSE
Scans         = 8192
Total_Scans   = 8192

Relaxation_Delay = 2[s]
Recvr_Gain       = 60
Temp_Get         = 22.7[dC]
X_90_Width      = 9.6[us]
X_Acq_Time      = 0.83361792[s]
X_Angle         = 30[deg]
X_Atn           = 4.1[dB]
X_Pulse         = 3.2[us]
Irr_Atn_Dec     = 21.587[dB]
Irr_Atn_No     = 21.587[dB]
Irr_Noise       = WALTZ
Irr_Pwidth      = 92[us]
Decoupling      = TRUE
Initial_Wait    = 1[s]
Noe             = TRUE
Noe_Time        = 2[s]
Repetition_Time = 2.83361792[s]
  
```

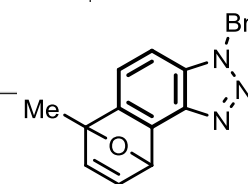

distal-3g

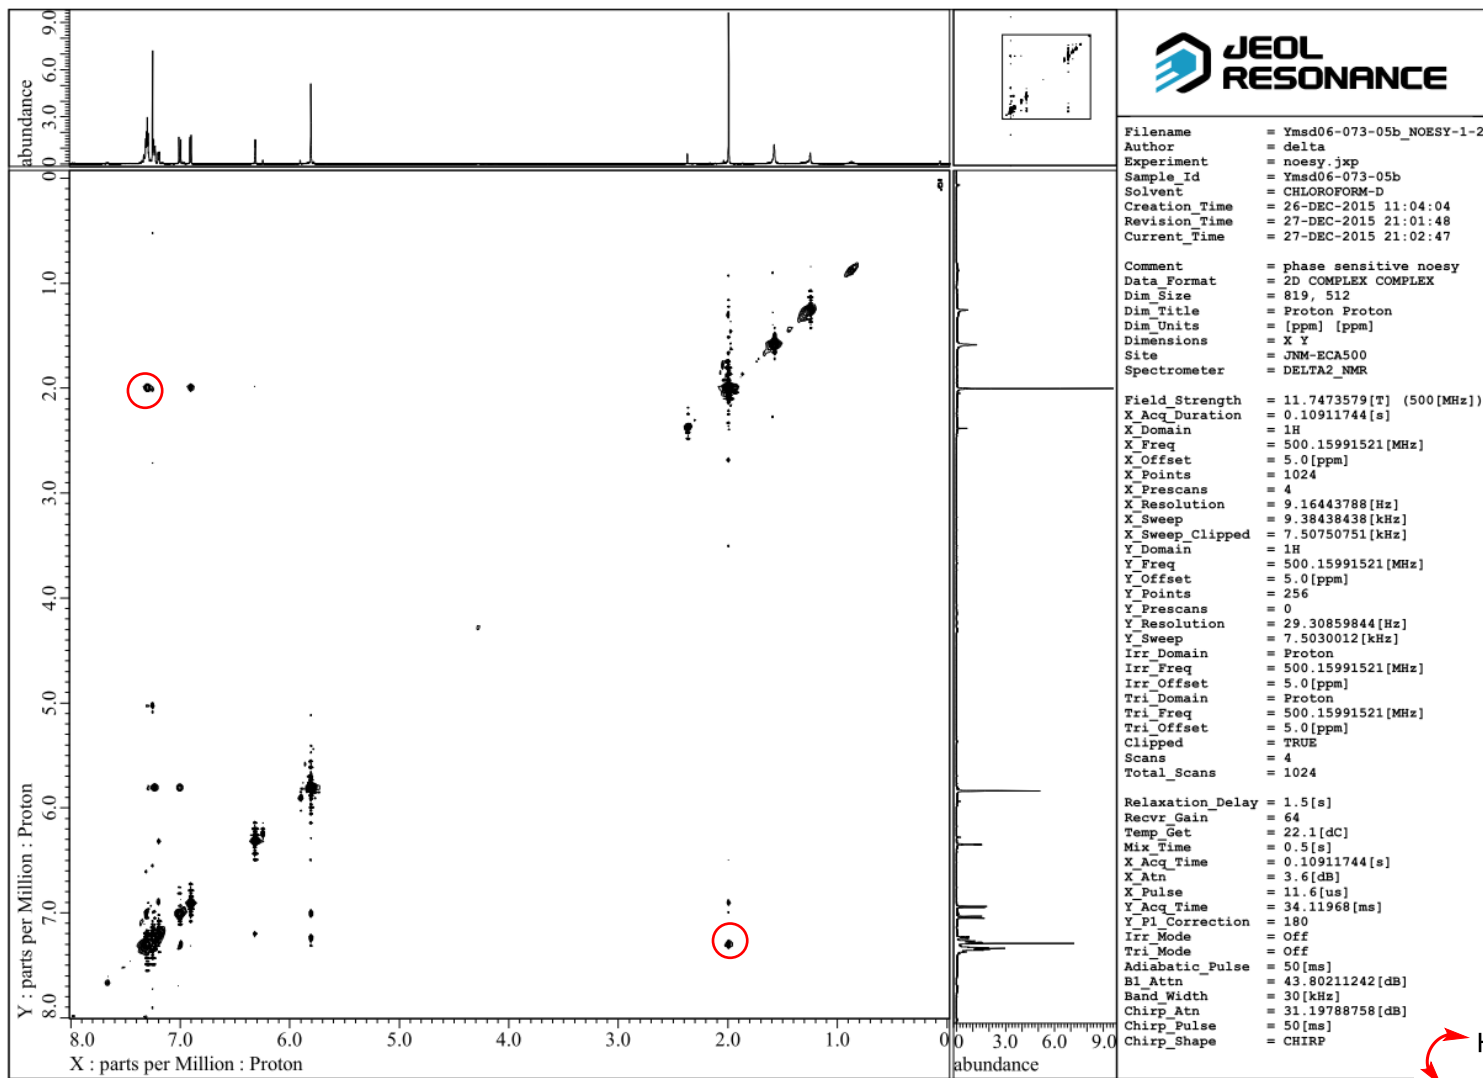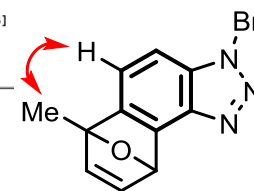

distal-3g

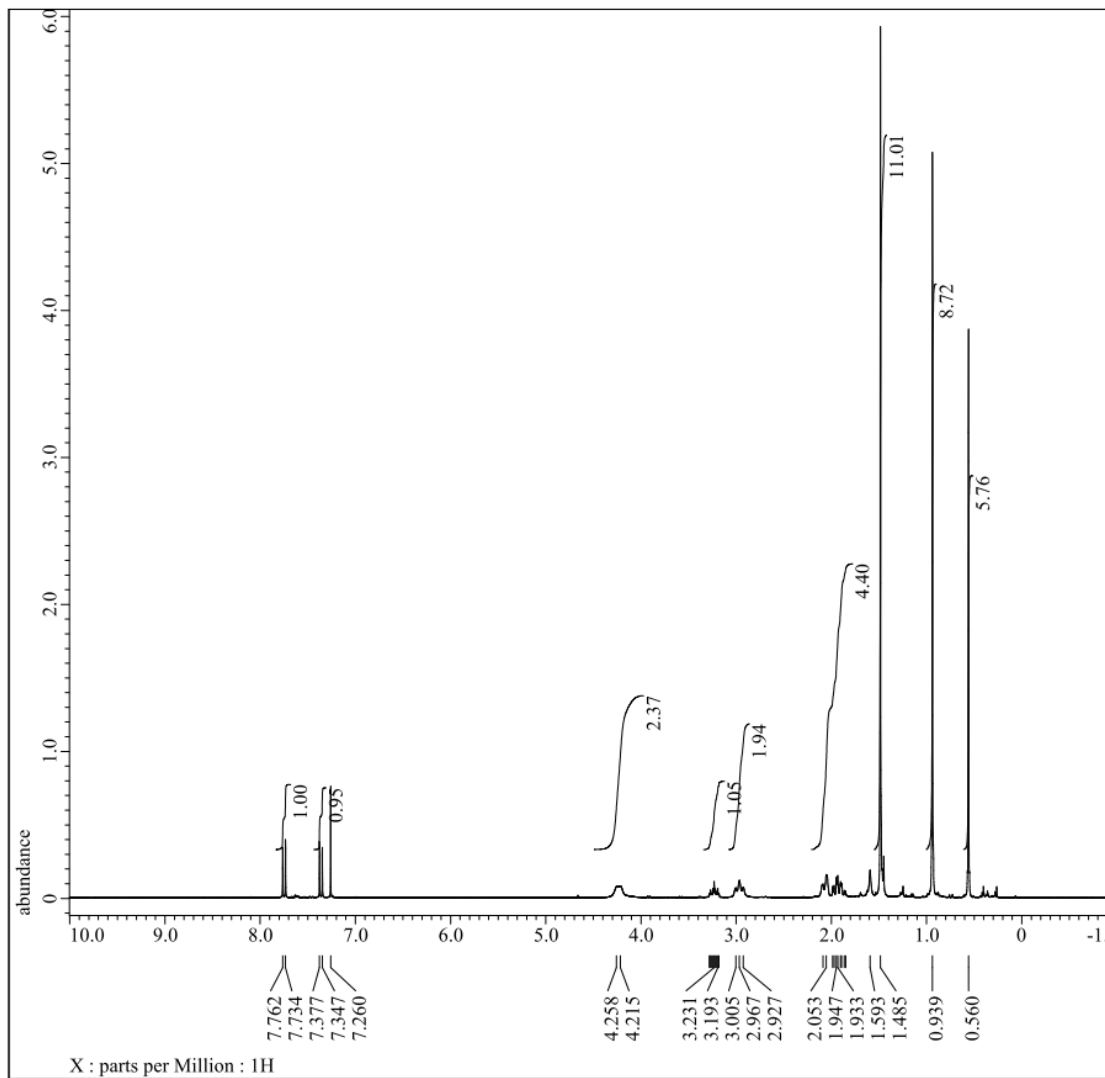

```

Filename      = Ymsd02-120-03-2.jdf
Author       = delta
Experiment   = single_pulse.ex2
Sample_Id    = S#716894
Solvent      = CHLOROFORM-D
Creation_Time = 23-JAN-2014 19:15:51
Revision_Time = 8-APR-2015 12:07:16
Current_Time  = 8-APR-2015 12:07:43

Comment      = single_pulse
Data Format   = 1D COMPLEX
Dim Size     = 13107
Dim Title    = 1H
Dim Units    = [ppm]
Dimensions   = X
Site         = ECS 300
Spectrometer = JNM-ECS300

Field Strength = 7.0586013[T] (300[MHz])
X_Acq_Duration = 2.90717696[s]
X_Domain       = 1H
X_Freq         = 300.52965592[MHz]
X_Offset       = 5[ppm]
X Points      = 16384
X_Prescans    = 1
X_Resolution  = 0.34397631[Hz]
X_Sweep       = 5.63570784[kHz]
Irr_Domain    = 1H
Irr_Freq      = 300.52965592[MHz]
Irr_Offset    = 5[ppm]
Tri_Domain    = 1H
Tri_Freq      = 300.52965592[MHz]
Tri_Offset    = 5[ppm]
Clipped       = FALSE
Scans         = 8
Total_Scans   = 8

Relaxation_Delay = 1.5[s]
Recvr_Gain       = 40
Temp_Get        = 16.4[dC]
X_90_Width     = 11.1[us]
X_Acq_Time     = 2.90717696[s]
X_Angle        = 45[deg]
X_Attn         = 1[dB]
X_Pulse        = 5.55[us]
Irr_Mode       = Off
Tri_Mode       = Off
DanTe_Presat   = FALSE
Initial_Wait   = 1[s]
Repetition_Time = 4.40717696[s]
  
```

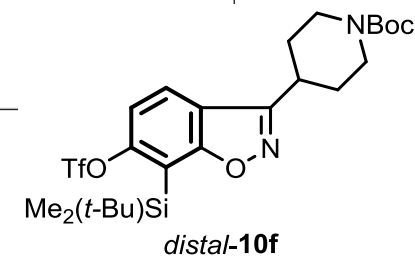

You created this PDF from an application that is not licensed to print to novaPDF printer (<http://www.novapdf.com>)

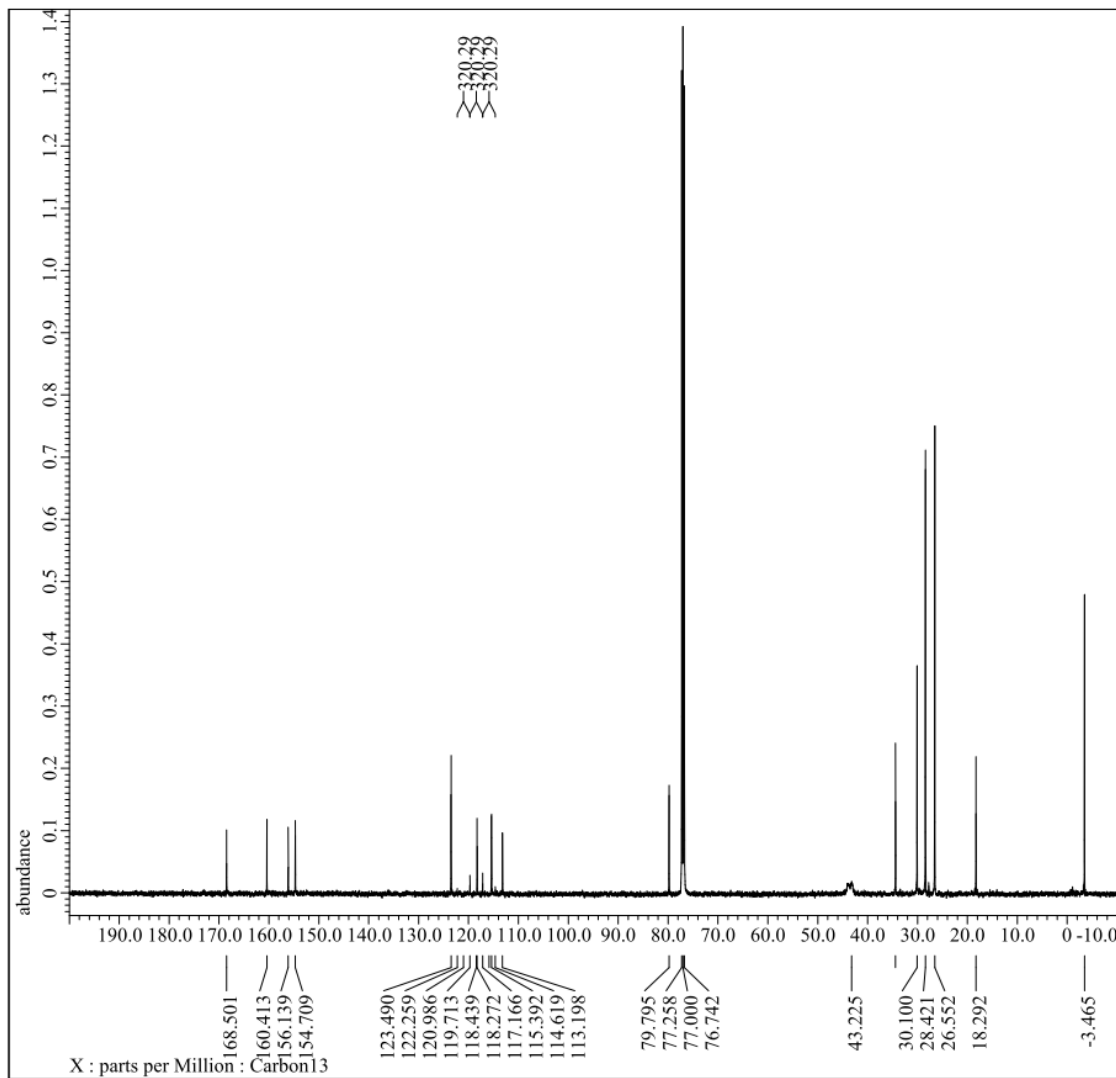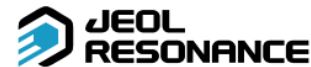

```

Filename      = Ymsd05-023-02_Carbon-1-3
Author       = delta
Experiment   = carbon_jxp
Sample_Id    = Ymsd05-023-02
Solvent      = CHLOROFORM-D
Creation_Time = 13-MAY-2015 00:34:58
Revision_Time = 28-MAY-2015 22:07:33
Current_Time  = 28-MAY-2015 22:08:46

Comment      = single pulse decoupled g
Data Format   = 1D COMPLEX
Dim_Size     = 26214
Dim_Title    = Carbon13
Dim_Units    = [ppm]
Dimensions   = X
Site         = JNM-ECA500
Spectrometer = DELTA2_NMR

Field_Strength = 11.7473579[T] (500[MHz])
X_Acq_Duration = 0.83361792[s]
X_Domain      = 13C
X_Freq        = 125.76529768[MHz]
X_Offset      = 100[ppm]
X_Points      = 32768
X_Prescans    = 4
X_Resolution  = 1.19959034[Hz]
X_Sweep       = 39.3081761[kHz]
X_Sweep_Clipped = 31.44654088[kHz]
Irr_Domain    = Proton
Irr_Freq      = 500.15991521[MHz]
Irr_Offset    = 5.0[ppm]
Clipped       = FALSE
Scans         = 2048
Total_Scans   = 2048

Relaxation_Delay = 2[s]
Recvr_Gain       = 60
Temp_Get         = 19.5[dC]
X_90_Width      = 9.6[us]
X_Acq_Time      = 0.83361792[s]
X_Angle         = 30[deg]
X_Atn           = 4.1[dB]
X_Pulse         = 3.2[us]
Irr_Atn_Dec     = 21.587[dB]
Irr_Atn_Noise  = 21.587[dB]
Irr_Noise       = WALTZ
Irr_Pwidth      = 92[us]
Decoupling      = TRUE
Initial_Wait    = 1[s]
Noe              = TRUE
Noe_Time        = 2[s]
Repetition_Time = 2.83361792[s]

```

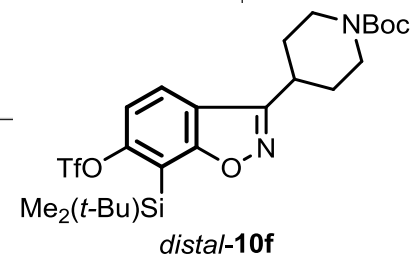

You created this PDF from an application that is not licensed to print to novaPDF printer (<http://www.novapdf.com>)

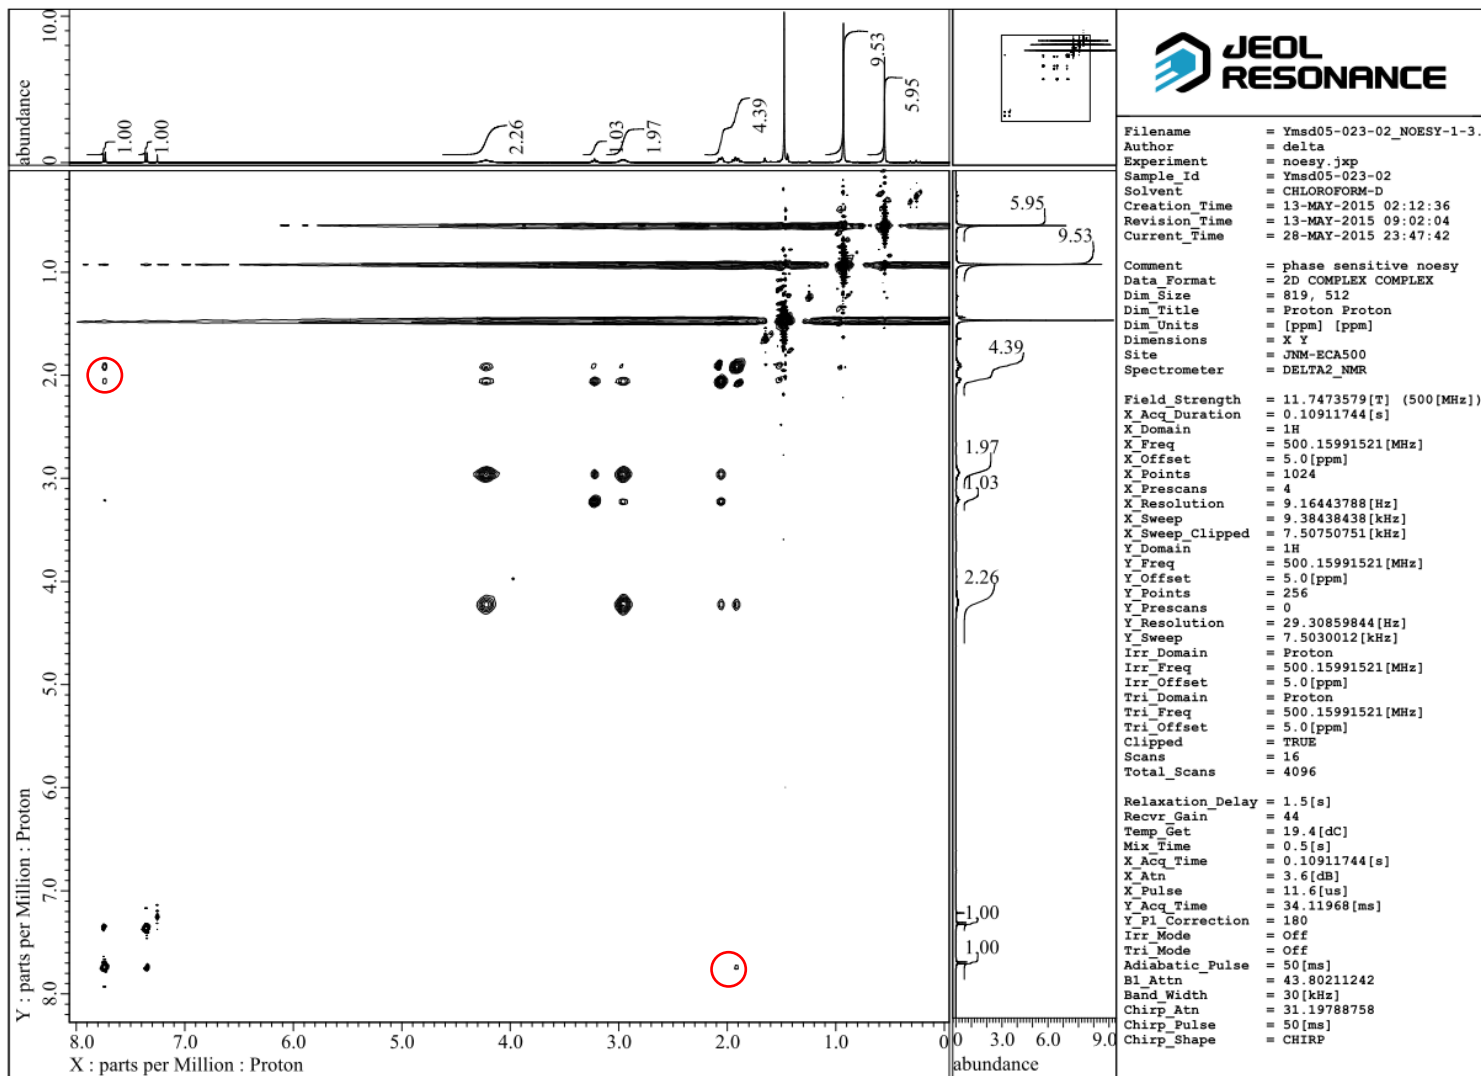

You created this PDF from an application that is not licensed to print to novaPDF printer (<http://www.novapdf.com>)

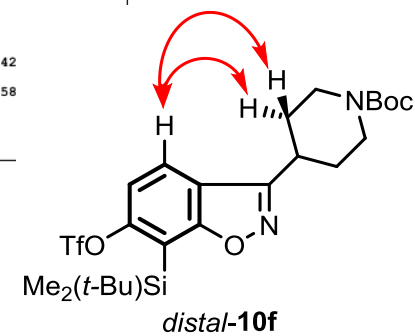

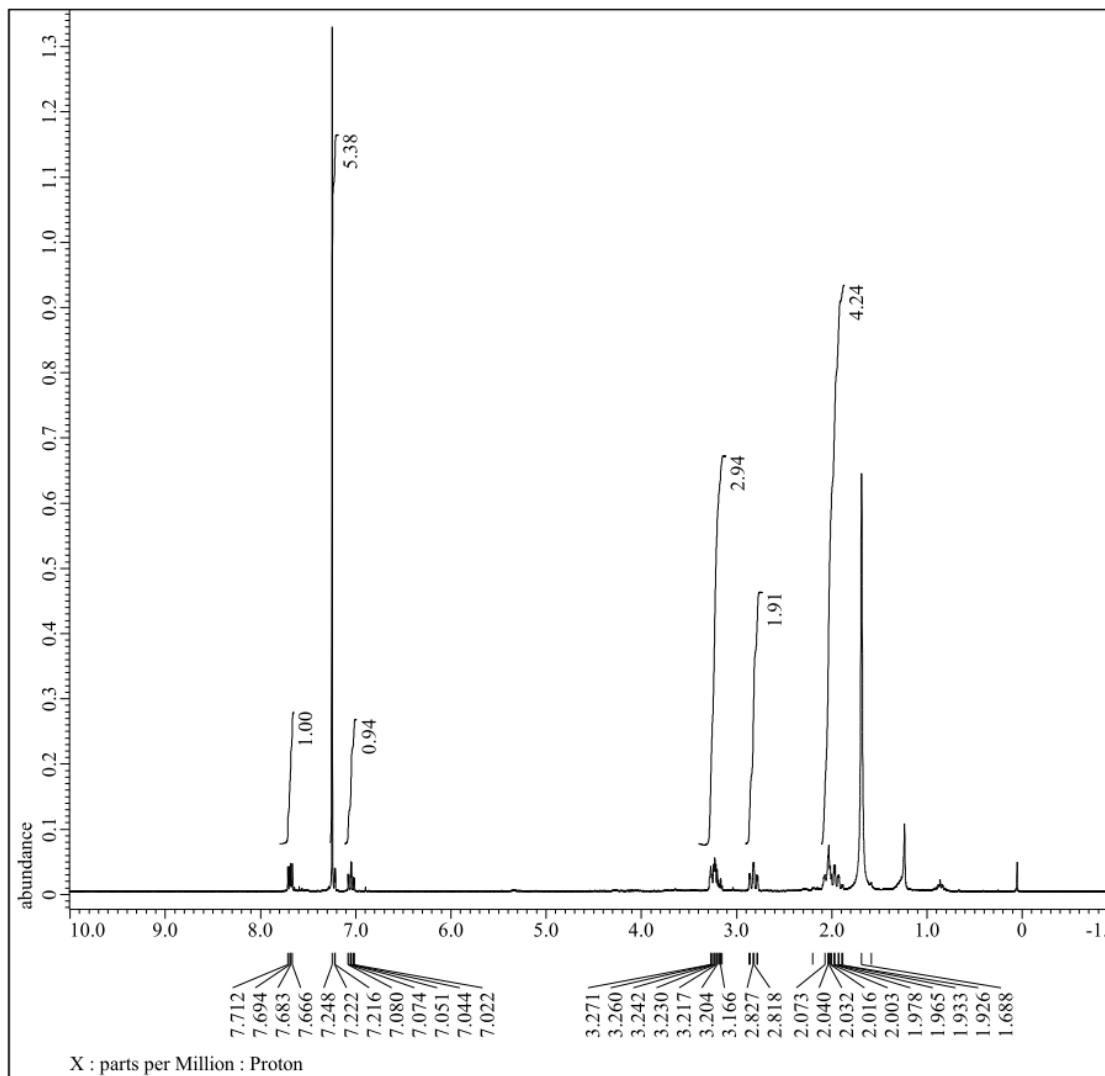

```

Filename      = Ymsd05-130-02b_proton-1-
Author       = delta
Experiment   = proton_jxp
Sample_Id    = Ymsd05-130-02b
Solvent      = CHLOROFORM-D
Creation_Time = 26-AUG-2015 21:38:44
Revision_Time = 2-NOV-2015 17:37:09
Current_Time  = 2-NOV-2015 17:37:41

Comment      = single pulse
Data Format   = 1D COMPLEX
Dim_Size     = 13107
Dim_Title    = Proton
Dim_Units    = [ppm]
Dimensions   = X
Site         = ECS 300
Spectrometer = DELTA2_NMR

Field_Strength = 7.0586013[T] (300[MHz])
X_Acq_Duration = 2.90455552[s]
X_Domain      = 1H
X_Freq        = 300.52965592[MHz]
X_Offset      = 5[ppm]
X_Points     = 16384
X_Prescans   = 1
X_Resolution = 0.34428676[Hz]
X_Sweep      = 5.64079422[kHz]
X_Sweep_Clippped = 4.51263538[kHz]
Irr_Domain    = Proton
Irr_Freq     = 300.52965592[MHz]
Irr_Offset    = 5[ppm]
Tri_Domain    = Proton
Tri_Freq     = 300.52965592[MHz]
Tri_Offset    = 5[ppm]
Clipped      = FALSE
Scans        = 32
Total_Scans  = 32

Relaxation_Delay = 2[s]
Recvr_Gain       = 40
Temp_Get        = 20.7[dc]
X_90_Width     = 11.2[us]
X_Acq_Time     = 2.90455552[s]
X_Angle        = 45[deg]
X_Atn          = 11[db]
X_Pulse        = 5.6[us]
Irr_Mode       = Off
Tri_Mode       = Off
Dante_Presat   = FALSE
Initial_Wait   = 1[s]
Repetition_Time = 4.90455552[s]
  
```

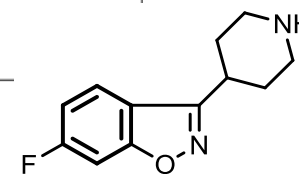

12

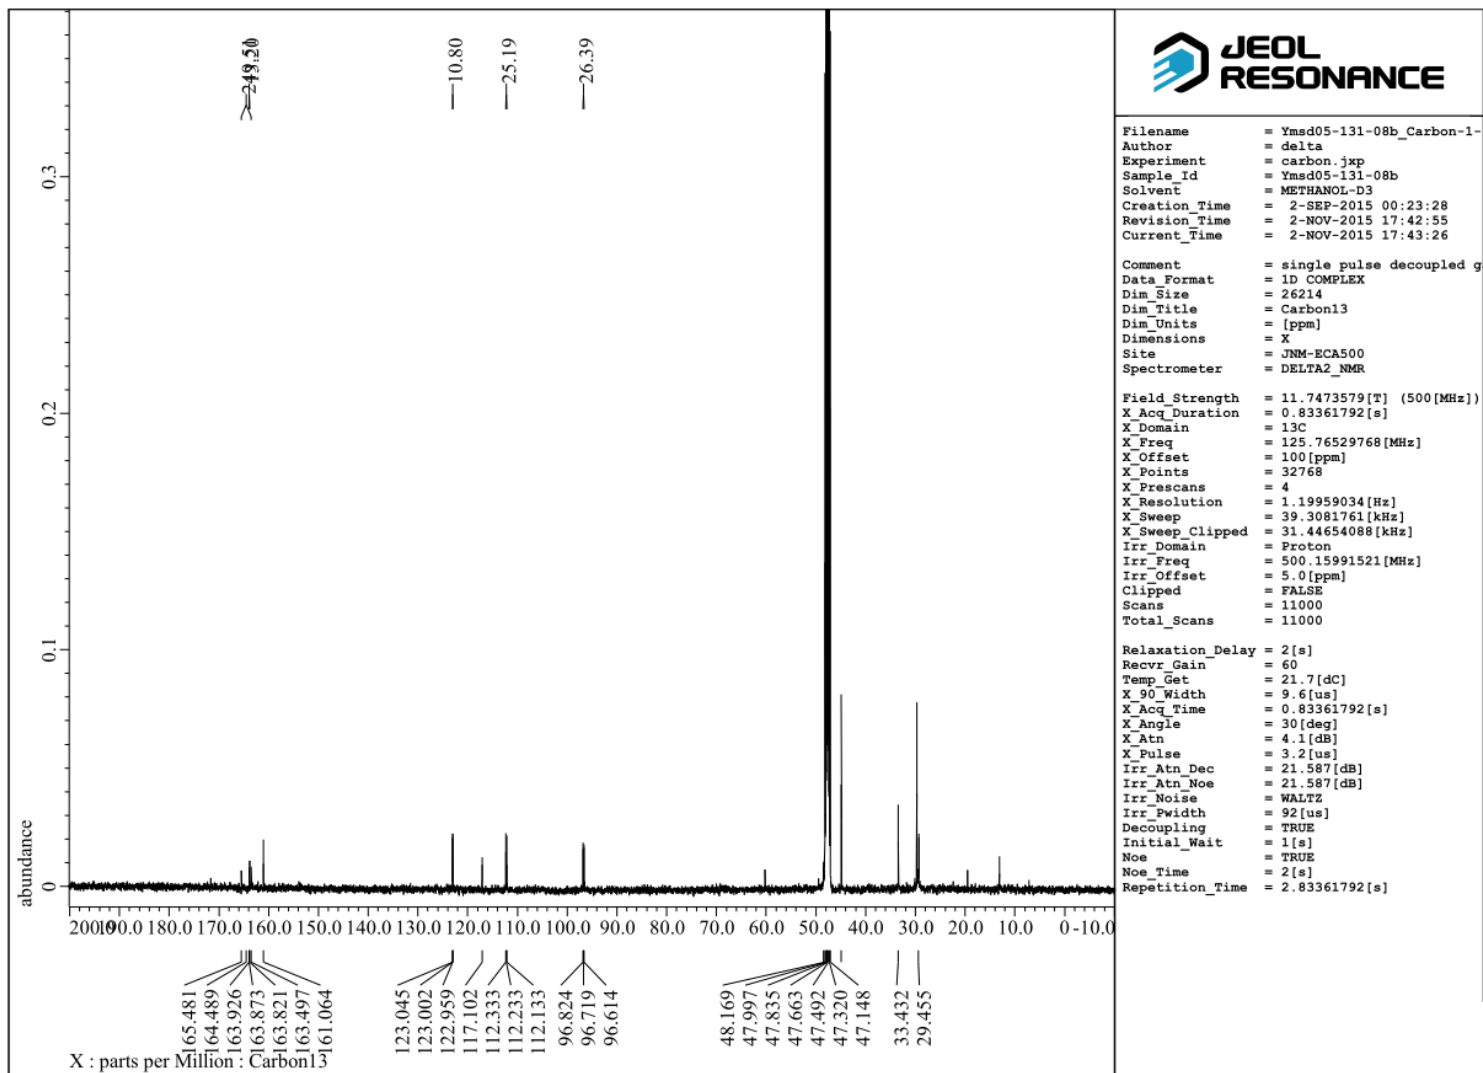

You created this PDF from an application that is not licensed to print to novaPDF printer (<http://www.novapdf.com>)

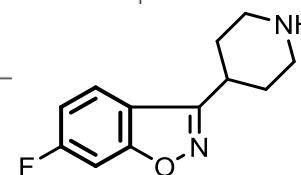

12



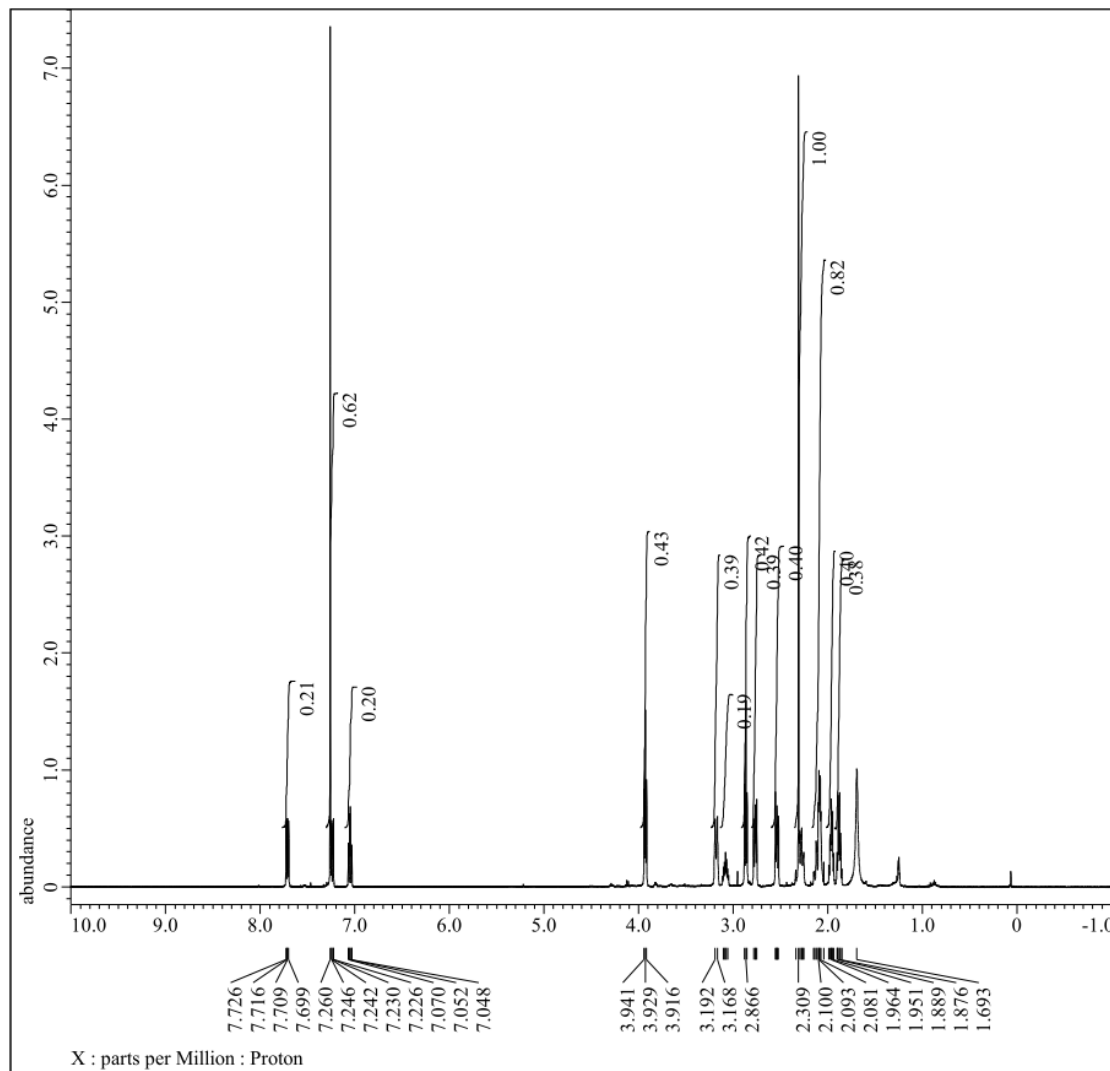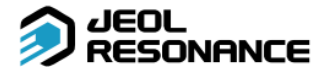

```

Filename      = Ymsd05-132-07_proton-1-5
Author       = delta
Experiment   = proton.jxp
Sample_Id    = Ymsd05-132-07
Solvent      = CHLOROFORM-D
Creation_Time = 12-SEP-2015 00:05:45
Revision_Time = 30-DEC-2015 00:59:24
Current_Time  = 30-DEC-2015 01:00:00

Comment      = single pulse
Data_Format  = 1D COMPLEX
Dim_Size     = 13107
Dim_Title    = Proton
Dim_Units    = [ppm]
Dimensions   = X
Site         = JNM-ECA500
Spectrometer = DELTA2_NMR

Field_Strength = 11.7473579[T] (500[MHz])
X_Acq_Duration = 1.74587904[s]
X_Domain       = 1H
X_Freq         = 500.15991521[MHz]
X_Offset       = 5.0[ppm]
X_Points       = 16384
X_Prescans     = 4
X_Resolution   = 0.57277737[Hz]
X_Sweep        = 9.38438438[kHz]
X_Sweep_Clippped = 7.50750751[kHz]
Irr_Domain     = Proton
Irr_Freq       = 500.15991521[MHz]
Irr_Offset     = 5.0[ppm]
Tri_Domain     = Proton
Tri_Freq       = 500.15991521[MHz]
Tri_Offset     = 5.0[ppm]
Clipped        = FALSE
Scans          = 16
Total_Scans    = 16

Relaxation_Delay = 2[s]
Recvr_Gain       = 50
Temp_Get         = 20.1[dC]
X_90_Width      = 11.6[us]
X_Acq_Time      = 1.74587904[s]
X_Angle         = 45[deg]
X_Atn           = 3.6[dB]
X_Pulse         = 5.8[us]
Irr_Mode        = Off
Tri_Mode        = Off
Dante_Presat    = FALSE
Initial_Wait    = 1[s]
Repetition_Time = 3.74587904[s]

```

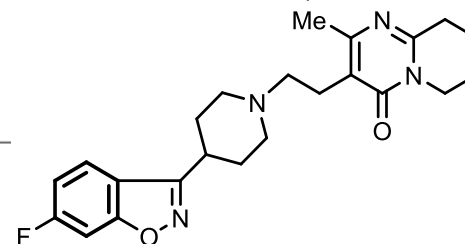

You created this PDF from an application that is not licensed to print to novaPDF printer (<http://www.novapdf.com>)

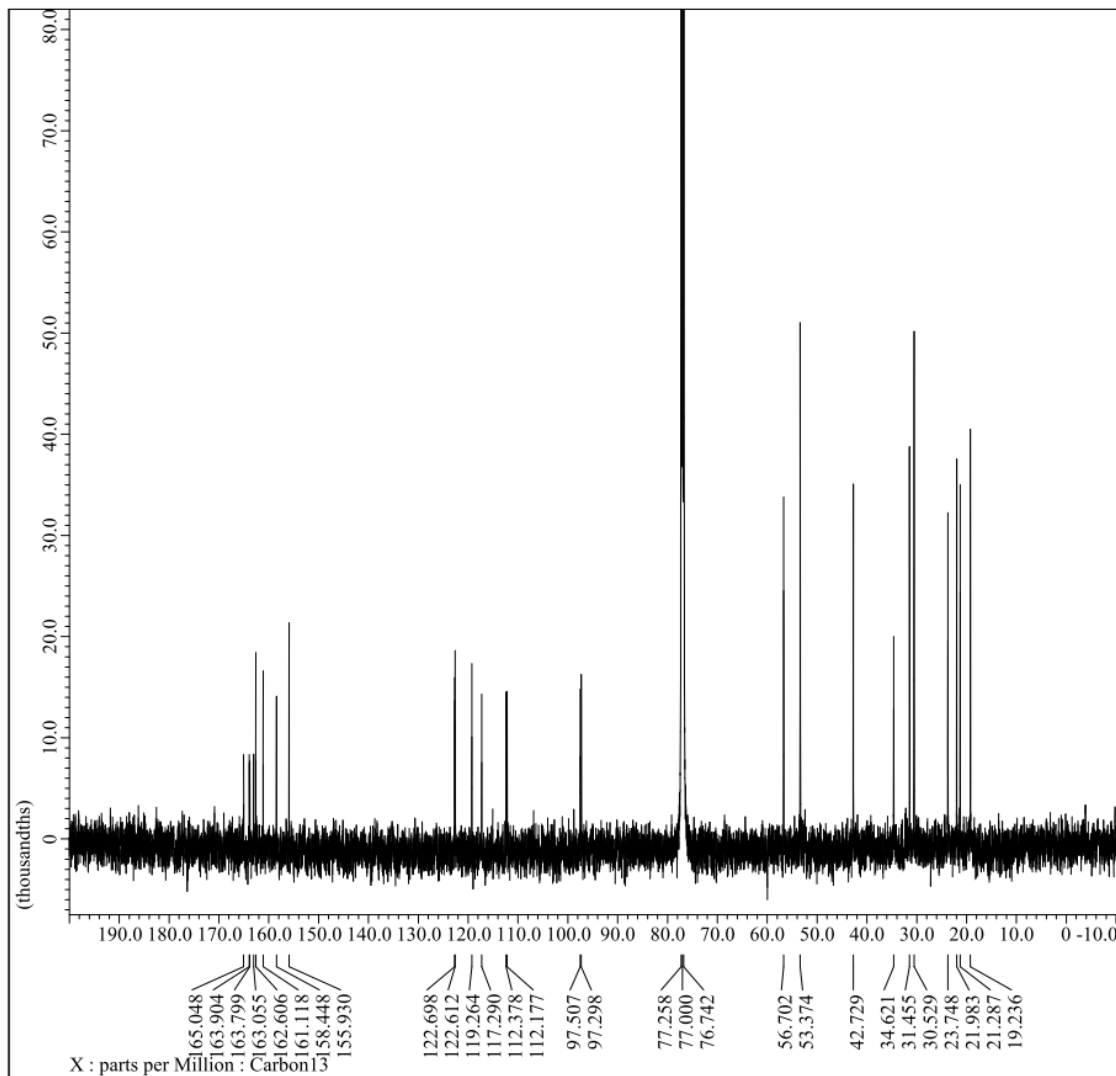

```

Filename      = Ymsd05-132-07_Carbon-1-3
Author       = delta
Experiment   = carbon_jxp
Sample_Id    = Ymsd05-132-07
Solvent      = CHLOROFORM-D
Creation_Time = 12-SEP-2015 00:20:21
Revision_Time = 17-SEP-2015 11:54:48
Current_Time  = 17-SEP-2015 11:55:08

Comment      = single pulse decoupled g
Data Format   = 1D COMPLEX
Dim_Size     = 26214
Dim_Title    = Carbon13
Dim_Units    = [ppm]
Dimensions   = X
Site         = JNM-ECA500
Spectrometer = DELTA2_NMR

Field_Strength = 11.7473579[T] (500[MHz])
X_Acq_Duration = 0.83361792[s]
X_Domain      = 13C
X_Freq       = 125.76529768[MHz]
X_Offset     = 100[ppm]
X_Points     = 32768
X_Prescans   = 4
X_Resolution = 1.19959034 [Hz]
X_Sweep      = 39.3081761 [kHz]
X_Sweep_Clipped = 31.44654088 [kHz]
Irr_Domain   = Proton
Irr_Freq    = 500.15991521 [MHz]
Irr_Offset  = 5.0 [ppm]
Clipped     = FALSE
Scans       = 5000
Total_Scans = 5000

Relaxation_Delay = 2[s]
Recvr_Gain      = 60
Temp_Get       = 20.8 [dC]
X_90_Width    = 9.6 [us]
X_Acq_Time    = 0.83361792[s]
X_Angle       = 30 [deg]
X_Atn         = 4.1 [dB]
X_Pulse       = 3.2 [us]
Irr_Atn_Dec   = 21.587 [dB]
Irr_Atn_Noise = 21.587 [dB]
Irr_Noise    = WALTZ
Irr_Pwidth    = 92 [us]
Decoupling    = TRUE
Initial_Wait  = 1[s]
Noe           = TRUE
Noe_Time     = 2[s]
Repetition_Time = 2.83361792[s]

```

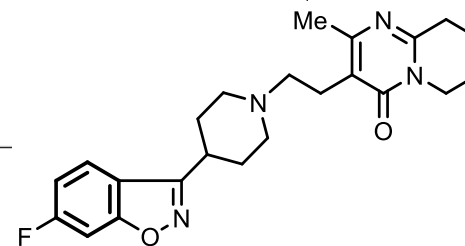

14

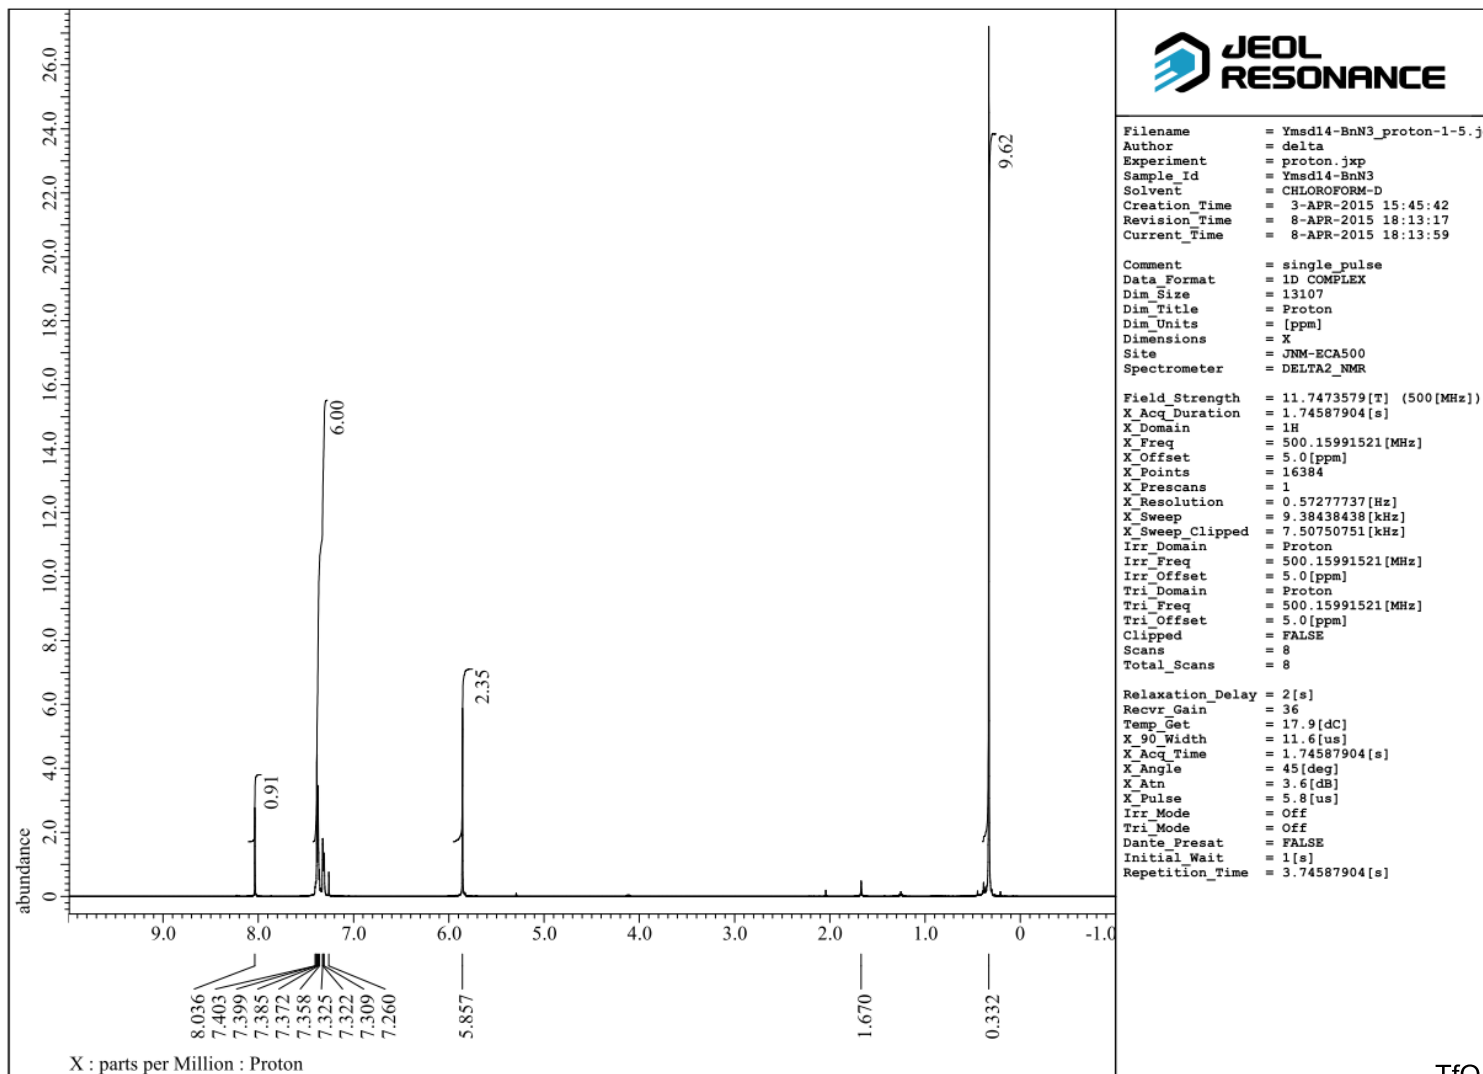

You created this PDF from an application that is not licensed to print to novaPDF printer (<http://www.novapdf.com>)

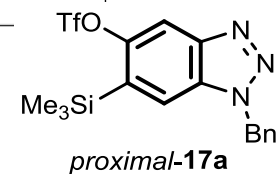

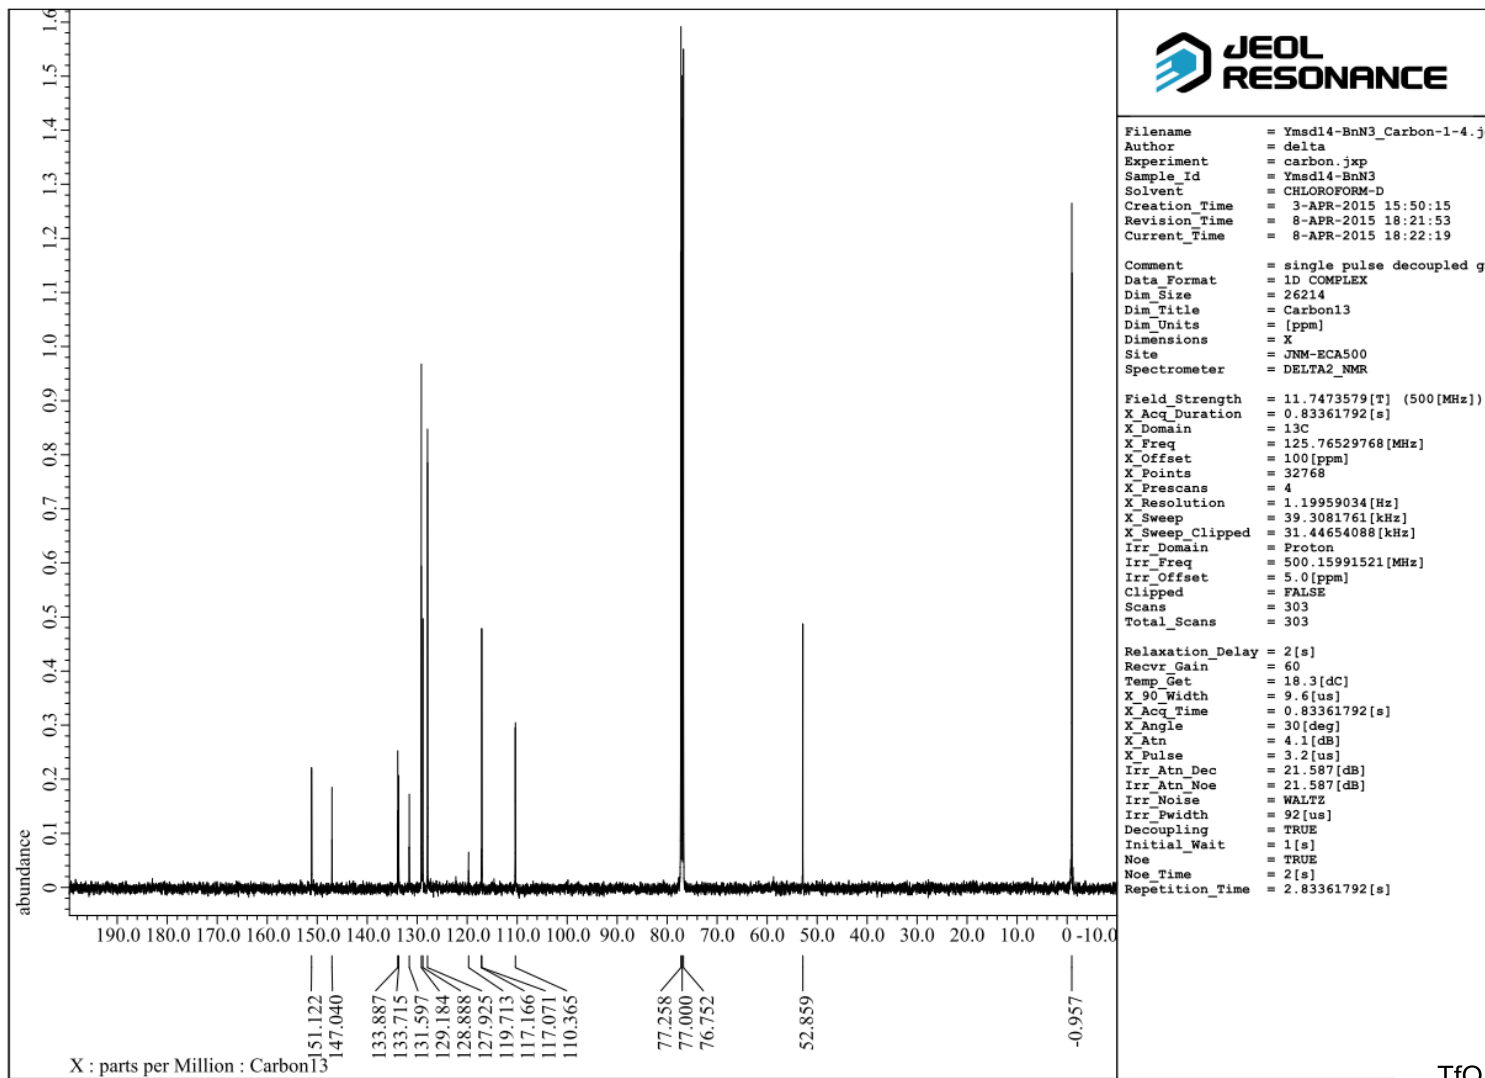

You created this PDF from an application that is not licensed to print to novaPDF printer (<http://www.novapdf.com>)

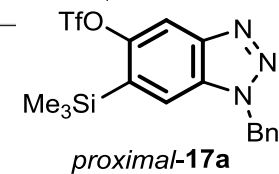

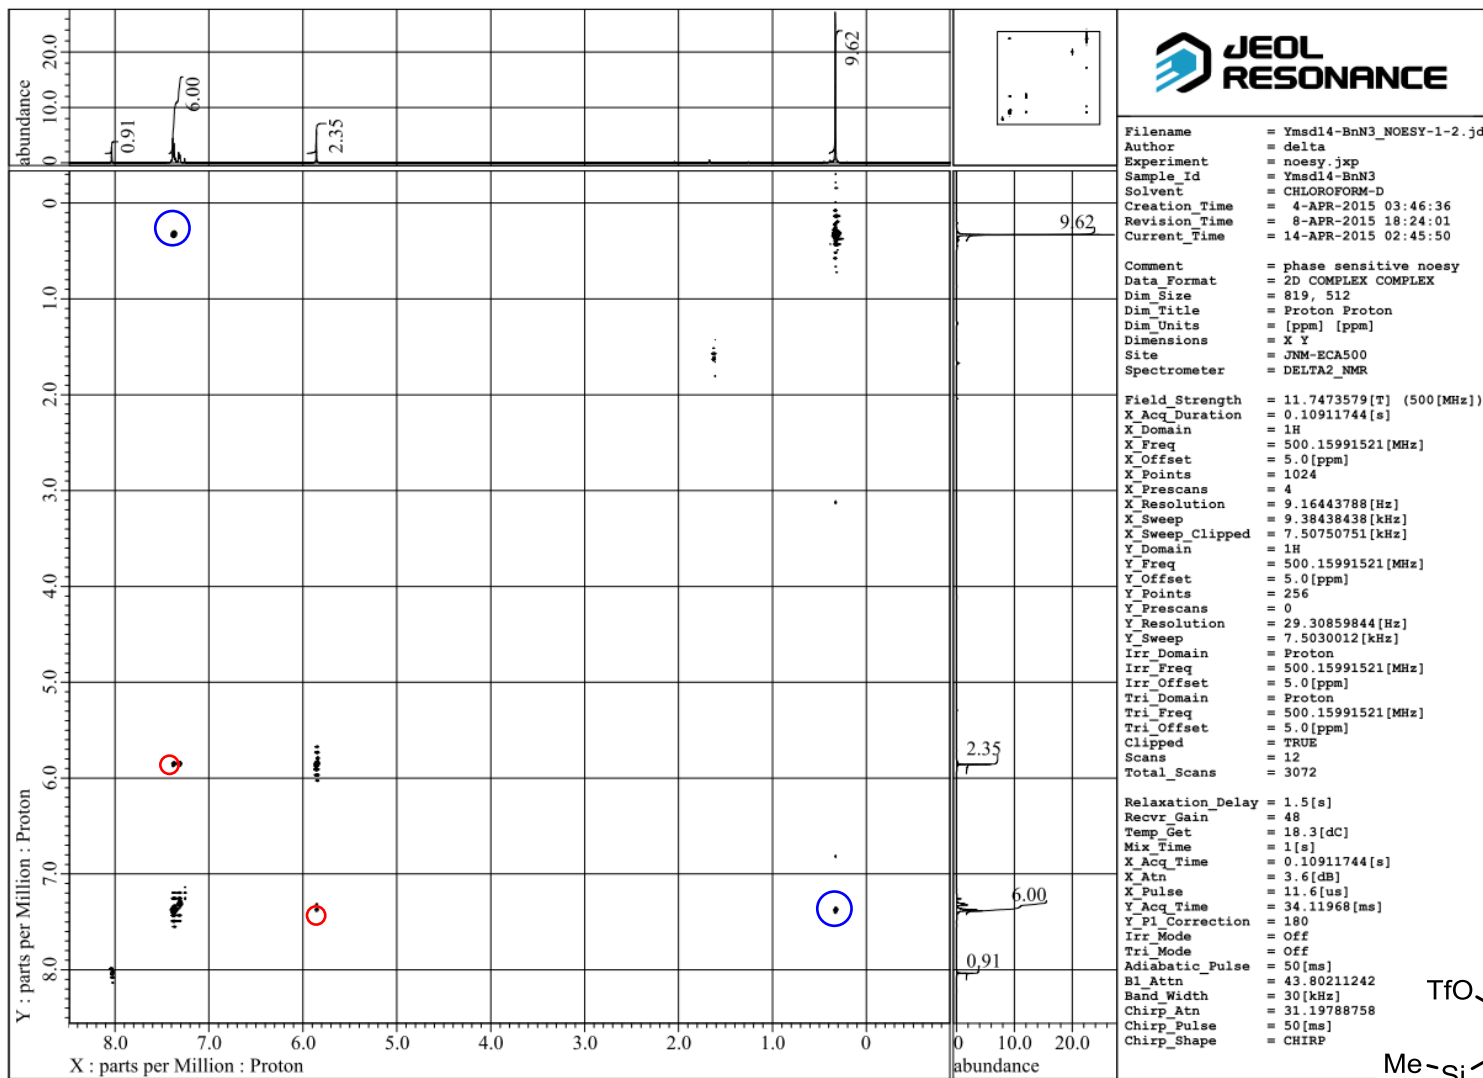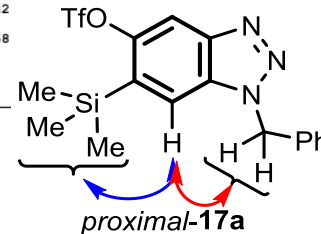

You created this PDF from an application that is not licensed to print to novaPDF printer (<http://www.novapdf.com>)

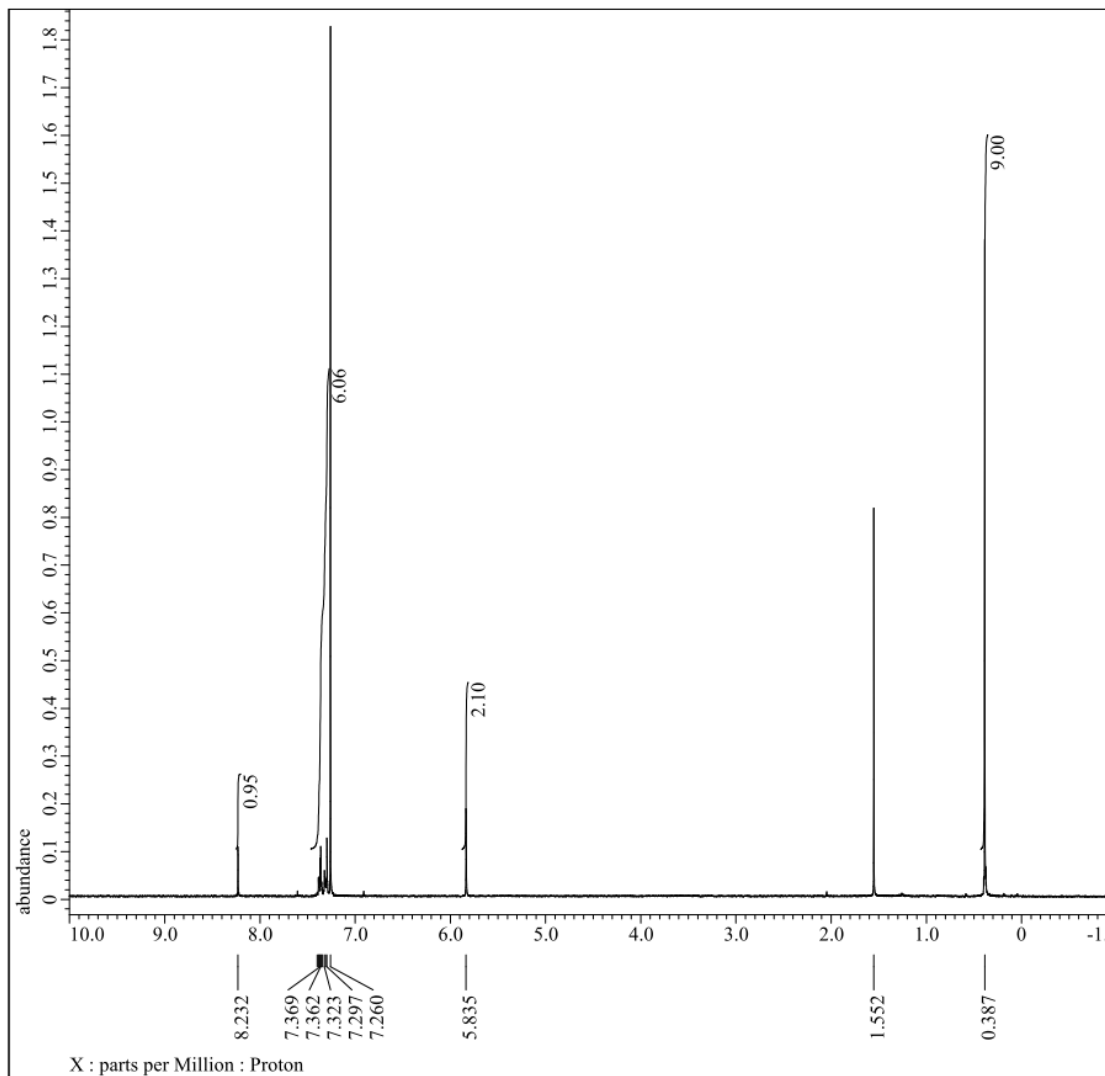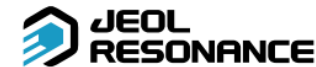

```

Filename      = Ymsd04-101-minor_proton-
Author       = delta
Experiment    = proton_jxp
Sample_Id     = Ymsd04-101-minor
Solvent       = CHLOROFORM-D
Creation_Time = 4-MAR-2015 18:21:16
Revision_Time = 8-APR-2015 02:45:30
Current_Time  = 8-APR-2015 02:47:00

Comment      = single pulse
Data Format   = 1D COMPLEX
Dim_Size     = 13107
Dim_Title    = Proton
Dim_Units    = [ppm]
Dimensions   = X
Site         = ECS 300
Spectrometer = DELTA2_NMR

Field_Strength = 7.0586013[T] (300[MHz])
X_Acq_Duration = 2.90717696[s]
X_Domain       = 1H
X_Freq         = 300.52965592[MHz]
X_Offset       = 5[ppm]
X_Points       = 16384
X_Prescans     = 1
X_Resolution   = 0.34397631[Hz]
X_Sweep        = 5.63570784[kHz]
X_Sweep_Clippped = 4.50856628[kHz]
Irr_Domain     = Proton
Irr_Freq       = 300.52965592[MHz]
Irr_Offset     = 5[ppm]
Tri_Domain     = Proton
Tri_Freq       = 300.52965592[MHz]
Tri_Offset     = 5[ppm]
Clipped        = FALSE
Scans          = 16
Total_Scans    = 16

Relaxation_Delay = 2[s]
Recvr_Gain       = 44
Temp_Get         = 17.9[dC]
X_90_Width      = 11.2[us]
X_Acq_Time      = 2.90717696[s]
X_Angle         = 45[deg]
X_Atn           = 1[dB]
X_Pulse         = 5.6[us]
Irr_Mode        = Off
Tri_Mode        = Off
Dante_Presat    = FALSE
Initial_Wait    = 1[s]
Repetition_Time = 4.90717696[s]
  
```

You created this PDF from an application that is not licensed to print to novaPDF printer (<http://www.novapdf.com>)

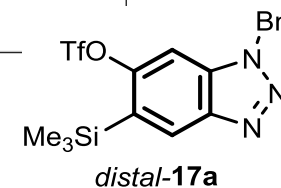

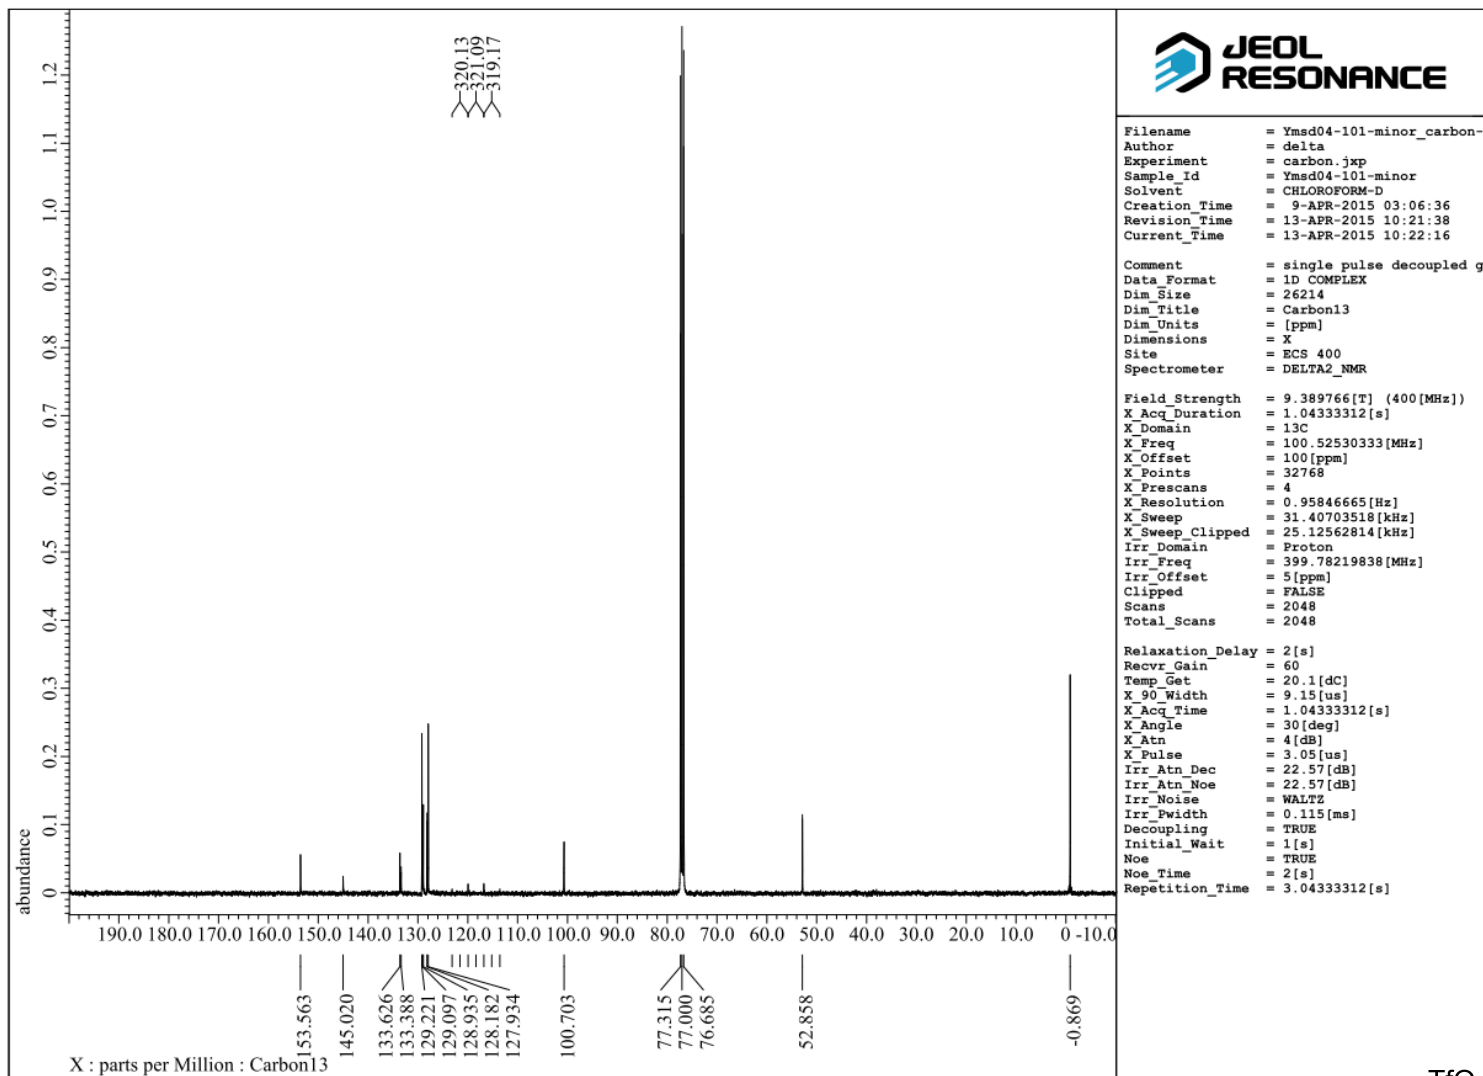

You created this PDF from an application that is not licensed to print to novaPDF printer (<http://www.novapdf.com>)

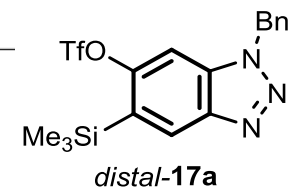

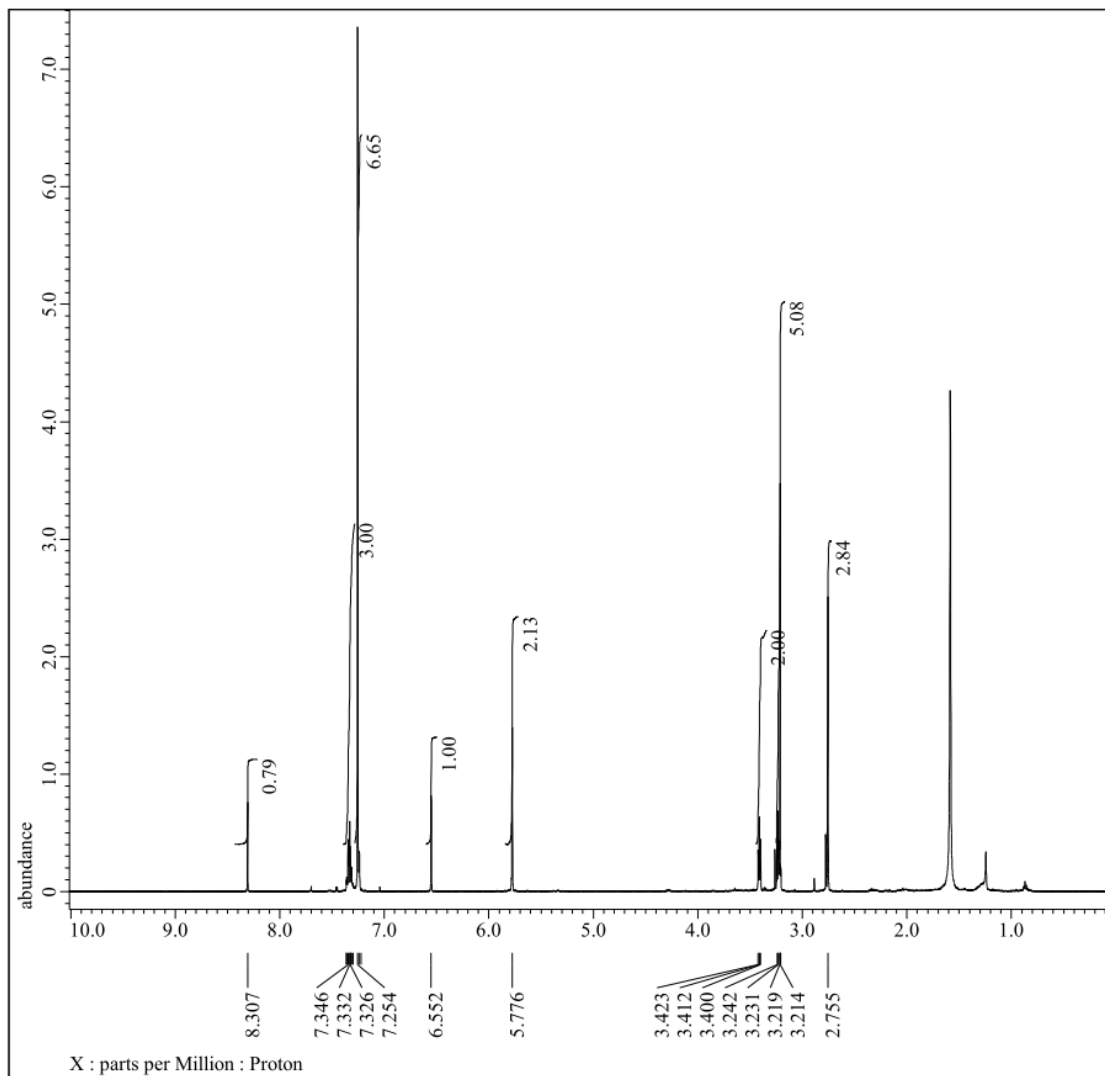

```

Filename      = Ymsd05-125-07b_proton-1-
Author        = delta
Experiment    = proton_jxp
Sample_id     = Ymsd05-125-07b
Solvent       = CHLOROFORM-D
Creation_Time = 29-AUG-2015 00:47:22
Revision_Time = 2-NOV-2015 17:56:19
Current_Time  = 2-NOV-2015 17:56:30

Comment       = single pulse
Data Format    = 1D COMPLEX
Dim Size      = 13107
Dim Title     = Proton
Dim Units     = [ppm]
Dimensions    = X
Site          = JNM-ECA500
Spectrometer  = DELTA2_NMR

Field Strength = 11.7473579 [T] (500[MHz])
X_Acq_Duration = 1.74587904 [s]
X_Domain       = 1H
X_Freq         = 500.15991521 [MHz]
X_Offset       = 5.0 [ppm]
X_Points       = 16384
X_Prescans     = 1
X_Resolution   = 0.57277737 [Hz]
X_Sweep        = 9.38438438 [kHz]
X_Sweep_Clipped = 7.50750751 [kHz]
Irr_Domain     = Proton
Irr_Freq       = 500.15991521 [MHz]
Irr_Offset     = 5.0 [ppm]
Tri_Domain     = Proton
Tri_Freq       = 500.15991521 [MHz]
Tri_Offset     = 5.0 [ppm]
Clipped        = FALSE
Scans          = 8
Total_Scans    = 8

Relaxation_Delay = 2 [s]
Recvr_Gain       = 50
Temp_Get         = 20.4 [dC]
X_90_Width      = 11.6 [us]
X_Acq_Time      = 1.74587904 [s]
X_Angle         = 45 [deg]
X_Atn           = 3.6 [dB]
X_Pulse         = 5.8 [us]
Irr_Mode        = Off
Tri_Mode        = Off
Dante_Presat    = FALSE
Initial_Wait    = 1 [s]
Repetition_Time = 3.74587904 [s]

```

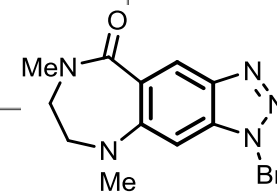

proximal-19a

You created this PDF from an application that is not licensed to print to novaPDF printer (<http://www.novapdf.com>)



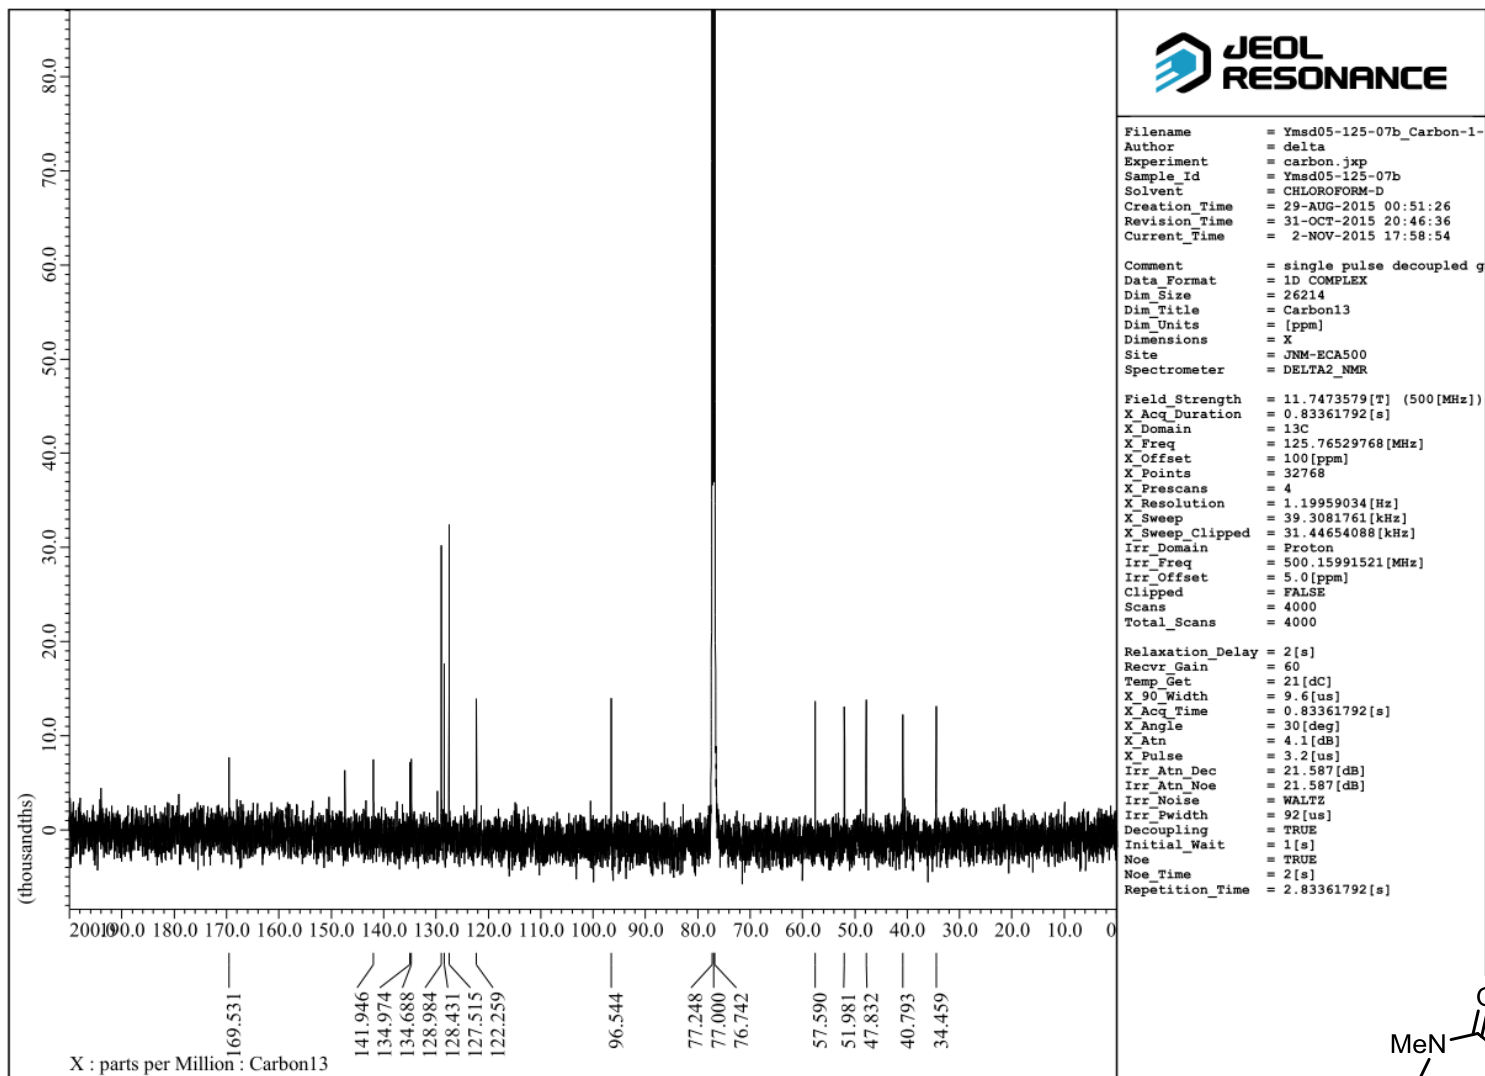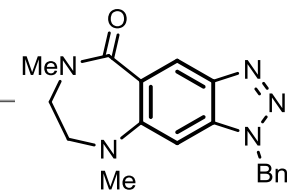

proximal-19a

You created this PDF from an application that is not licensed to print to novaPDF printer (<http://www.novapdf.com>)

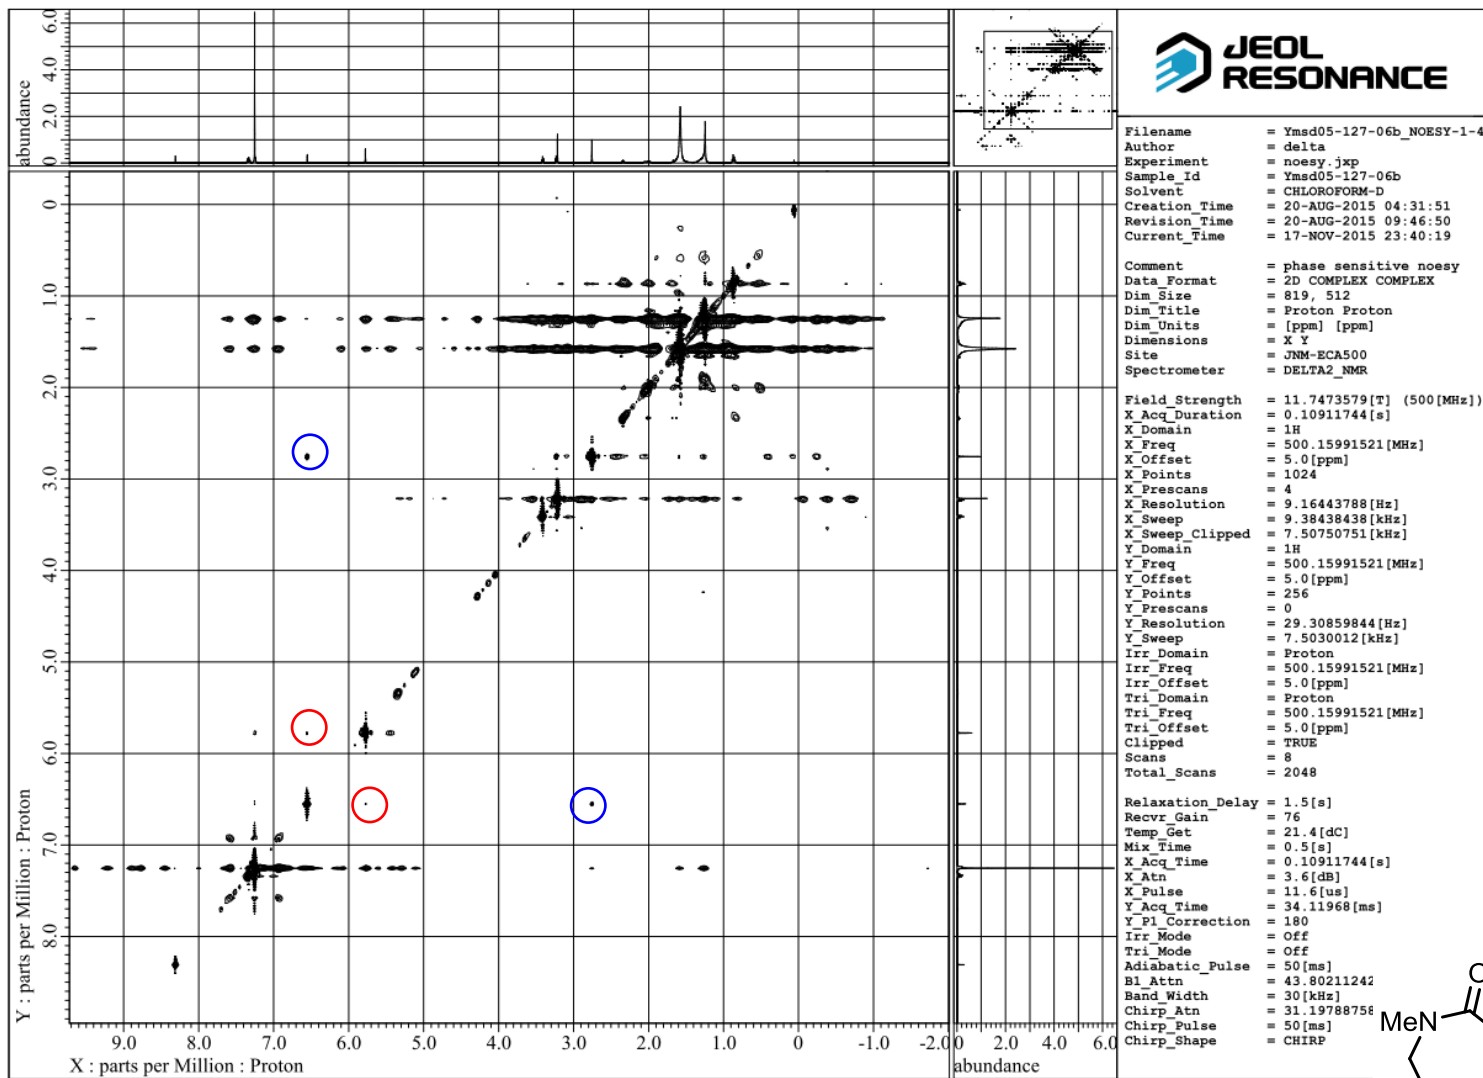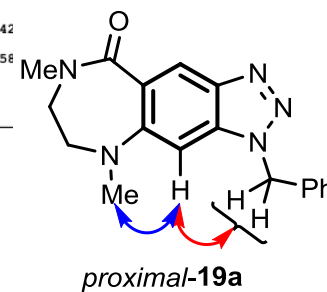

You created this PDF from an application that is not licensed to print to novaPDF printer (<http://www.novapdf.com>)

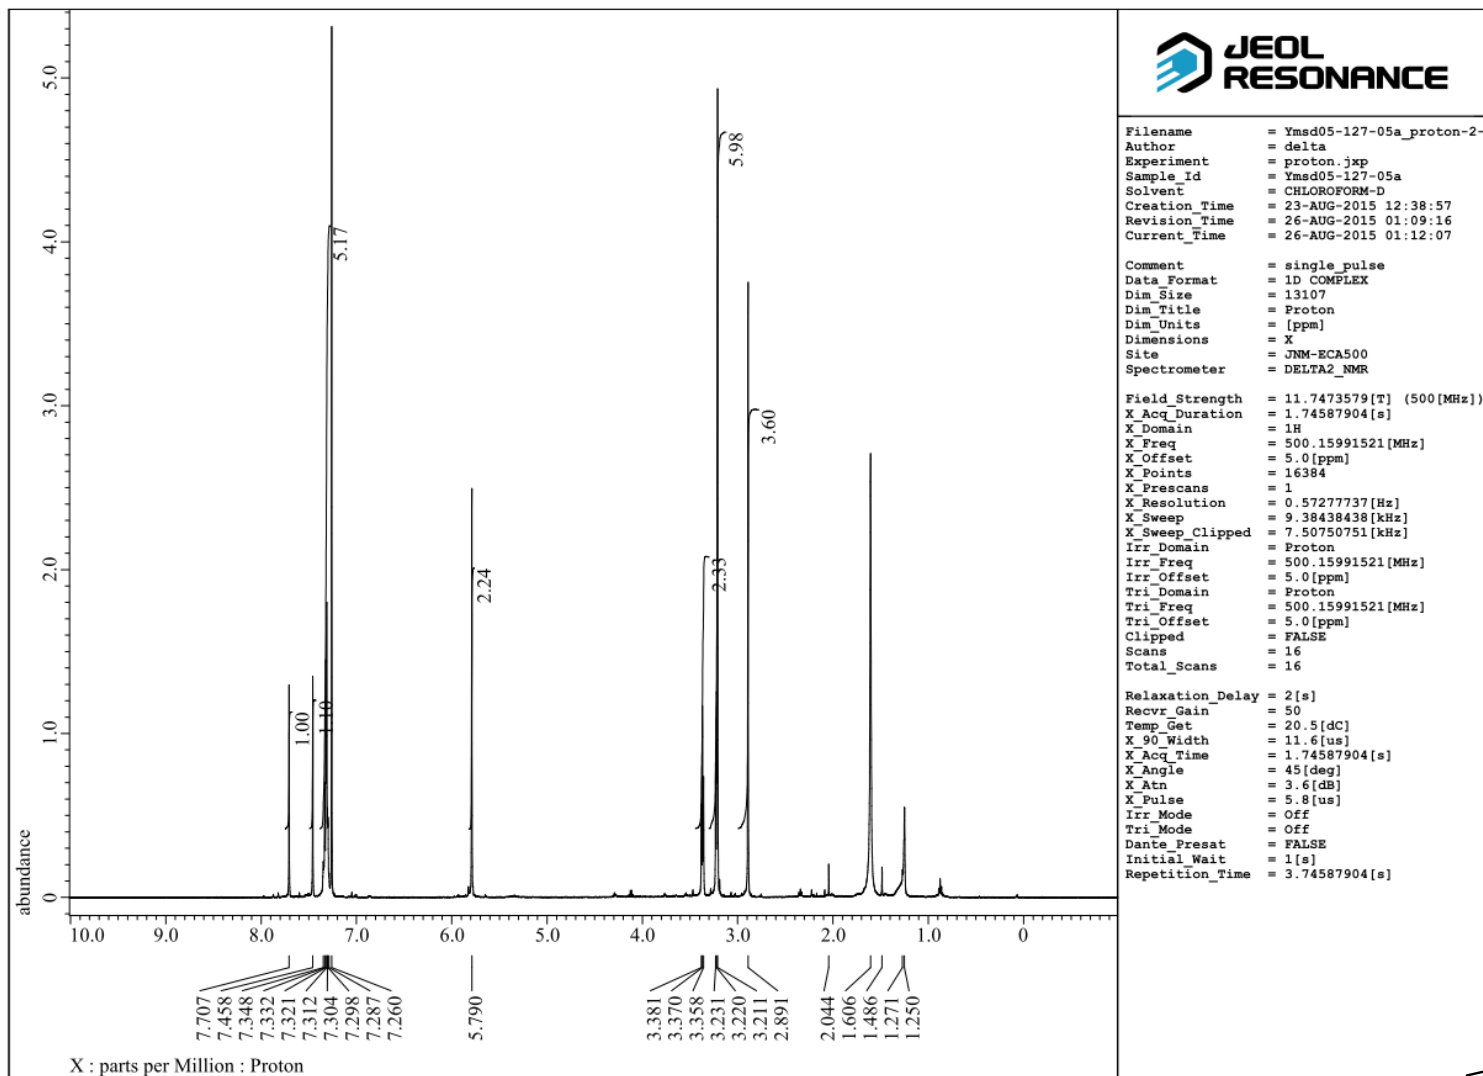

You created this PDF from an application that is not licensed to print to novaPDF printer (<http://www.novapdf.com>)

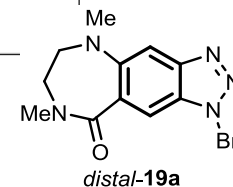

distal-19a

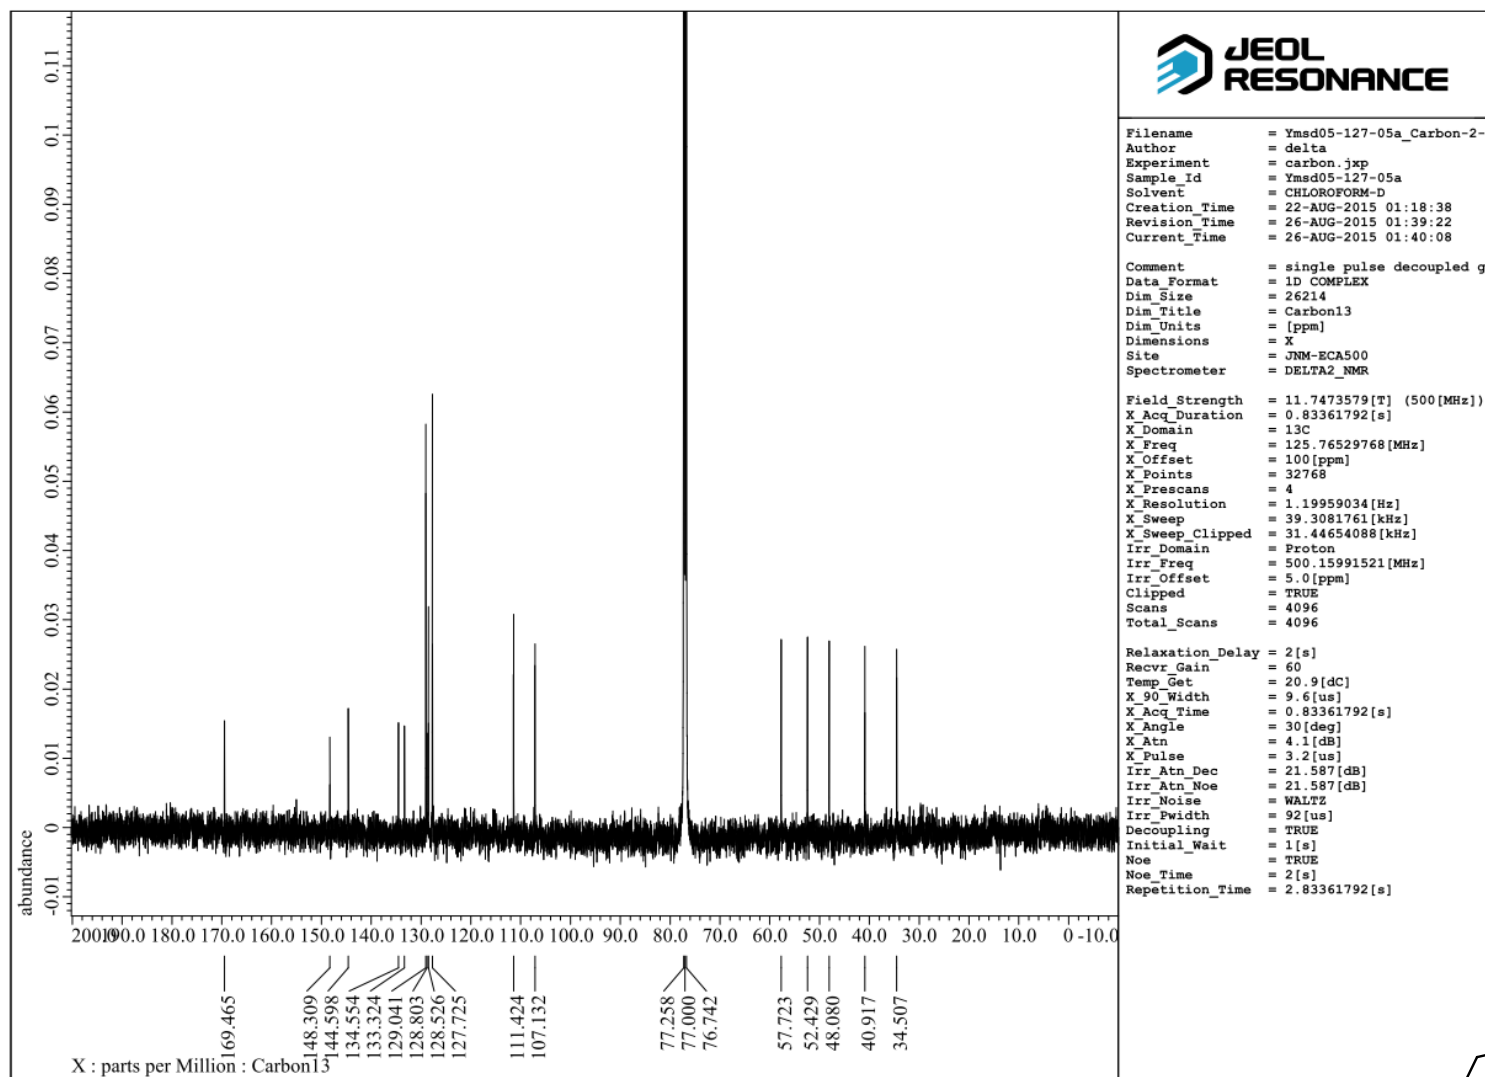

You created this PDF from an application that is not licensed to print to novaPDF printer (<http://www.novapdf.com>)

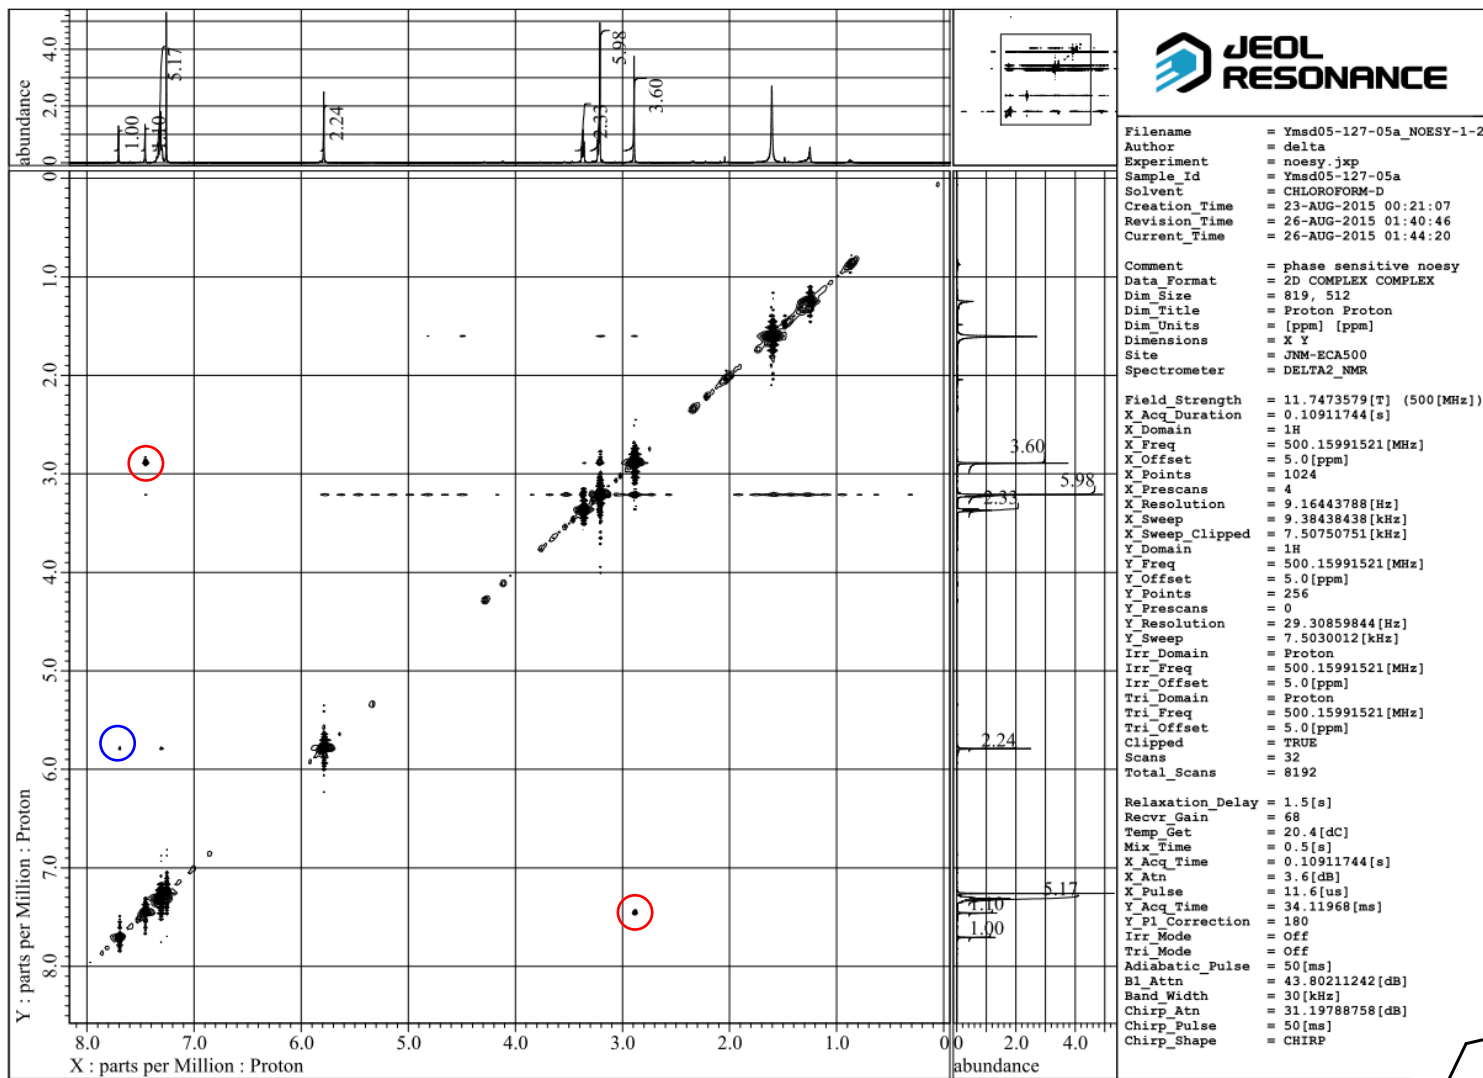

You created this PDF from an application that is not licensed to print to novaPDF printer (<http://www.novapdf.com>)

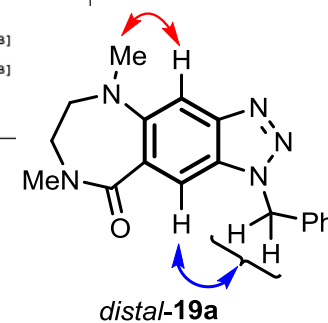

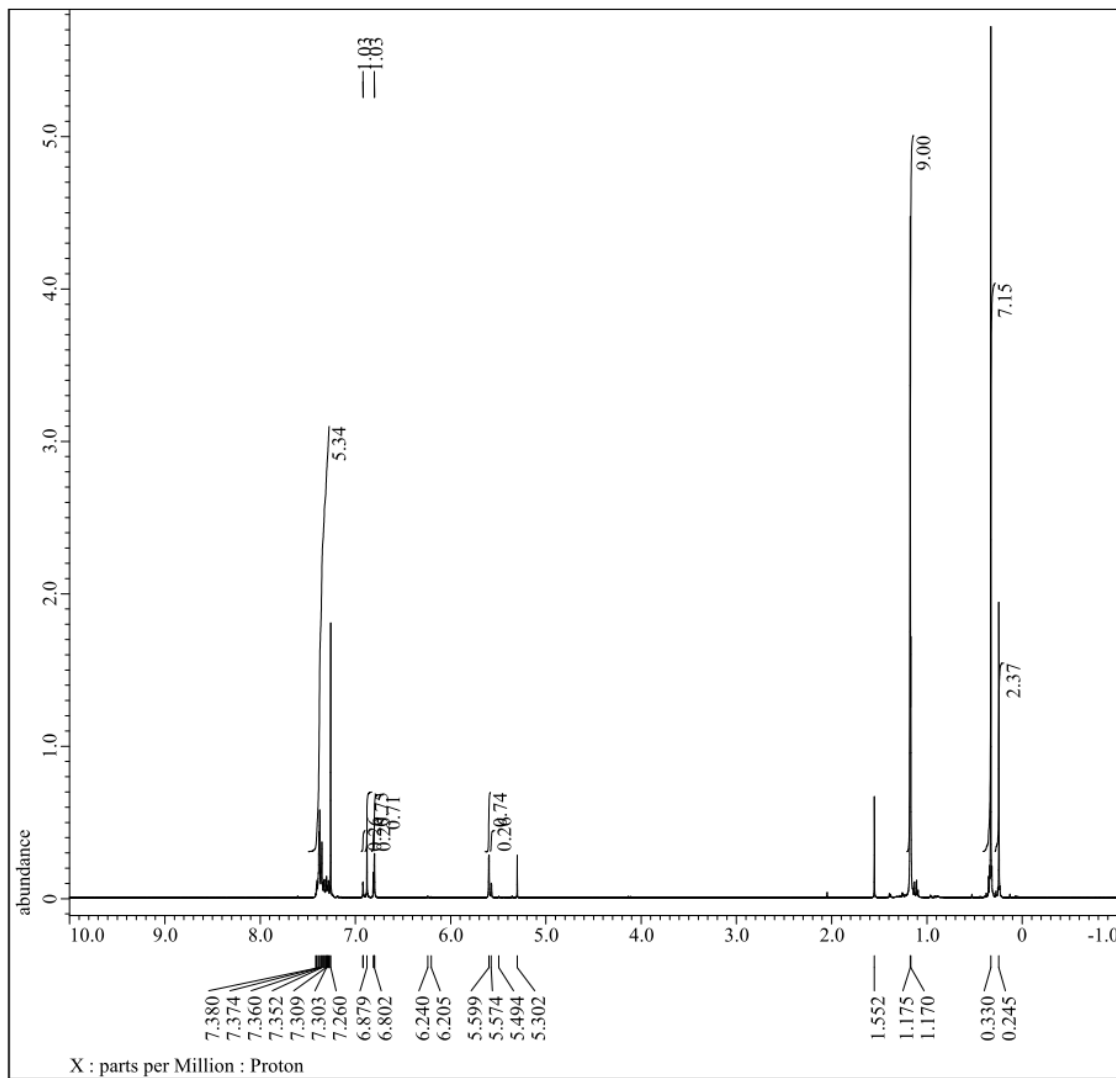

```

Filename      = Ymsd04-102-02_proton-1-2
Author       = delta
Experiment   = proton.jxp
Sample_Id    = Ymsd04-102-02major
Solvent      = CHLOROFORM-D
Creation_Time = 4-MAR-2015 10:59:42
Revision_Time = 8-APR-2015 11:31:10
Current_Time  = 8-APR-2015 11:32:48

Comment      = single pulse
Data Format   = 1D COMPLEX
Dim Size     = 13107
Dim Title    = Proton
Dim Units    = [ppm]
Dimensions   = X
Site         = ECS 300
Spectrometer = DELTA2_NMR

Field_Strength = 7.0586013[T] (300[MHz])
X_Acq_Duration = 2.90717696[s]
X_Domain       = 1H
X_Freq         = 300.52965592[MHz]
X_Offset       = 5[ppm]
X Points      = 16384
X_Prescans    = 1
X_Resolution  = 0.34397631[Hz]
X_Sweep       = 5.63570784[kHz]
X_Sweep_Clippped = 4.50856628[kHz]
Irr_Domain    = Proton
Irr_Freq      = 300.52965592[MHz]
Irr_Offset    = 5[ppm]
Tri_Domain    = Proton
Tri_Freq      = 300.52965592[MHz]
Tri_Offset    = 5[ppm]
Clipped       = FALSE
Scans         = 16
Total_Scans   = 16

Relaxation_Delay = 2[s]
Recvr_Gain       = 44
Temp_Get        = 17.6[dC]
X_90_Width     = 11.2[us]
X_Acq_Time     = 2.90717696[s]
X_Angle        = 45[deg]
X_Atn          = 1[dB]
X_Pulse        = 5.6[us]
Irr_Mode       = Off
Tri_Mode       = Off
Dante_Presat   = FALSE
Initial_Wait   = 1[s]
Repetition_Time = 4.90717696[s]
  
```

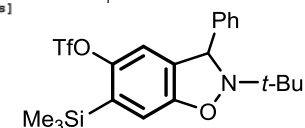

*distal-17b*

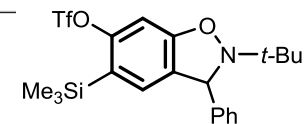

*proximal-17b*

You created this PDF from an application that is not licensed to print to novaPDF printer (<http://www.novapdf.com>)

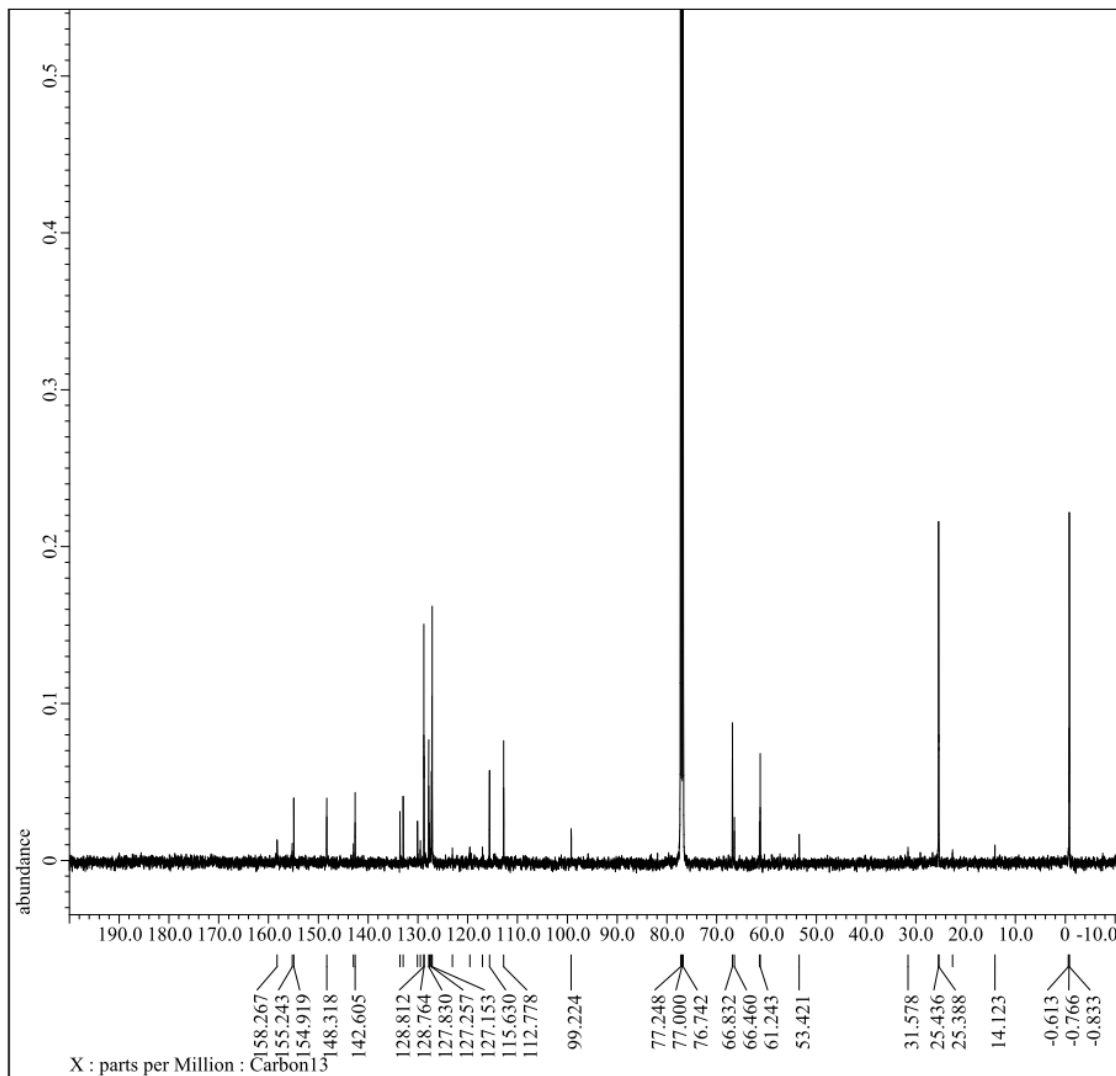

```

Filename      = Ymsd14-nitron_Carbon-1-3
Author       = delta
Experiment   = carbon_jxp
Sample_Id    = Ymsd14-nitron
Solvent      = CHLOROFORM-D
Creation_Time = 9-APR-2015 06:42:59
Revision_Time = 13-APR-2015 10:33:58
Current_Time  = 13-APR-2015 10:43:41

Comment      = single pulse decoupled g
Data Format   = 1D COMPLEX
Dim_Size     = 26214
Dim_Title    = Carbon13
Dim_Units    = [ppm]
Dimensions   = X
Site         = JNM-ECA500
Spectrometer = DELTA2_NMR

Field_Strength = 11.7473579[T] (500[MHz])
X_Acq_Duration = 0.83361792[s]
X_Domain      = 13C
X_Freq        = 125.76529768[MHz]
X_Offset      = 100[ppm]
X_Points      = 32768
X_Prescans    = 4
X_Resolution  = 1.19959034 [Hz]
X_Sweep       = 39.3081761 [kHz]
X_Sweep_Clipped = 31.44654088 [kHz]
Irr_Domain    = Proton
Irr_Freq      = 500.15991521 [MHz]
Irr_Offset    = 5.0 [ppm]
Clipped       = FALSE
Scans         = 2000
Total_Scans   = 2000

Relaxation_Delay = 2[s]
Recvr_Gain       = 60
Temp_Get         = 17.9 [dC]
X_90_Width      = 9.6 [us]
X_Acq_Time      = 0.83361792[s]
X_Angle         = 30 [deg]
X_Atn           = 4.1 [dB]
X_Pulse         = 3.2 [us]
Irr_Atn_Dec     = 21.587 [dB]
Irr_Atn_Noise  = 21.587 [dB]
Irr_Noise      = WALTZ
Irr_Pwidth     = 92 [us]
Decoupling      = TRUE
Initial_Wait    = 1[s]
Noe              = TRUE
Noe_Time        = 2[s]
Repetition_Time = 2.83361792
  
```

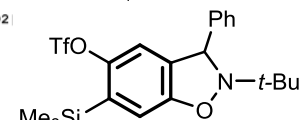

*distal-17b*

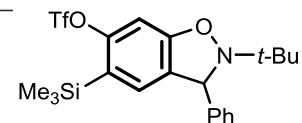

*proximal-17b*

You created this PDF from an application that is not licensed to print to novaPDF printer (<http://www.novapdf.com>)

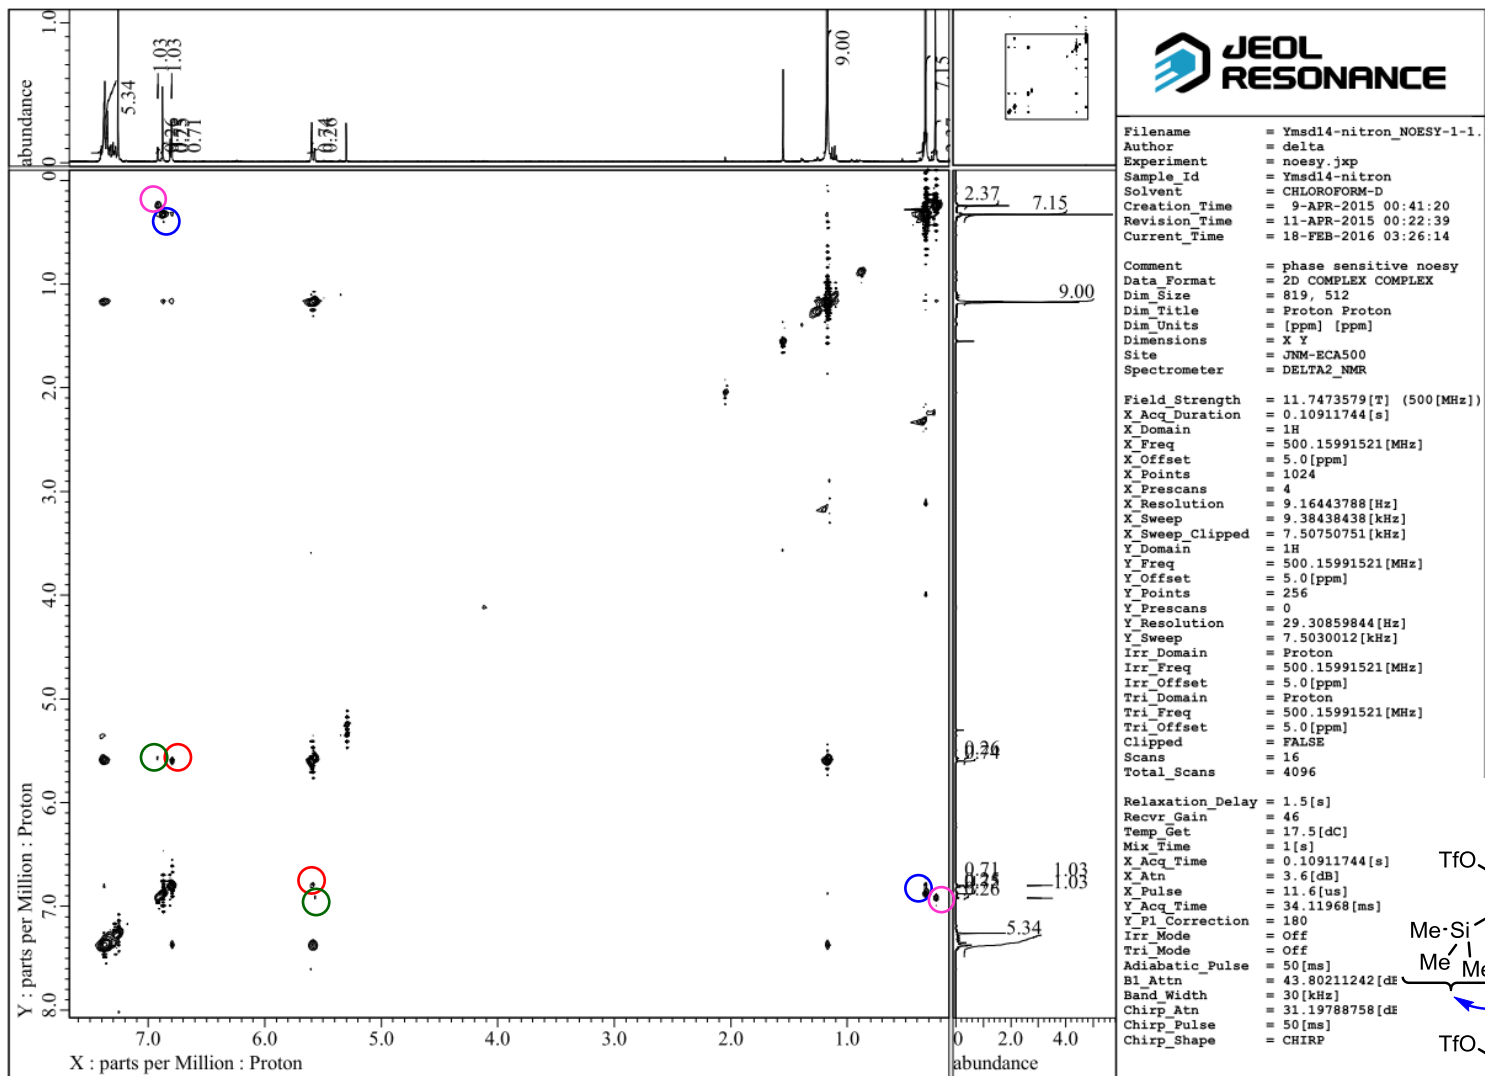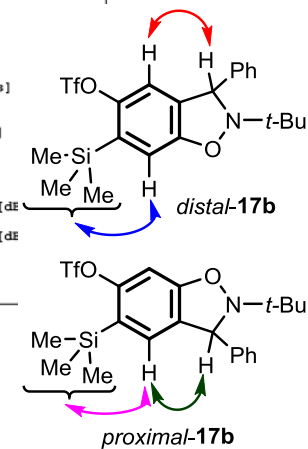



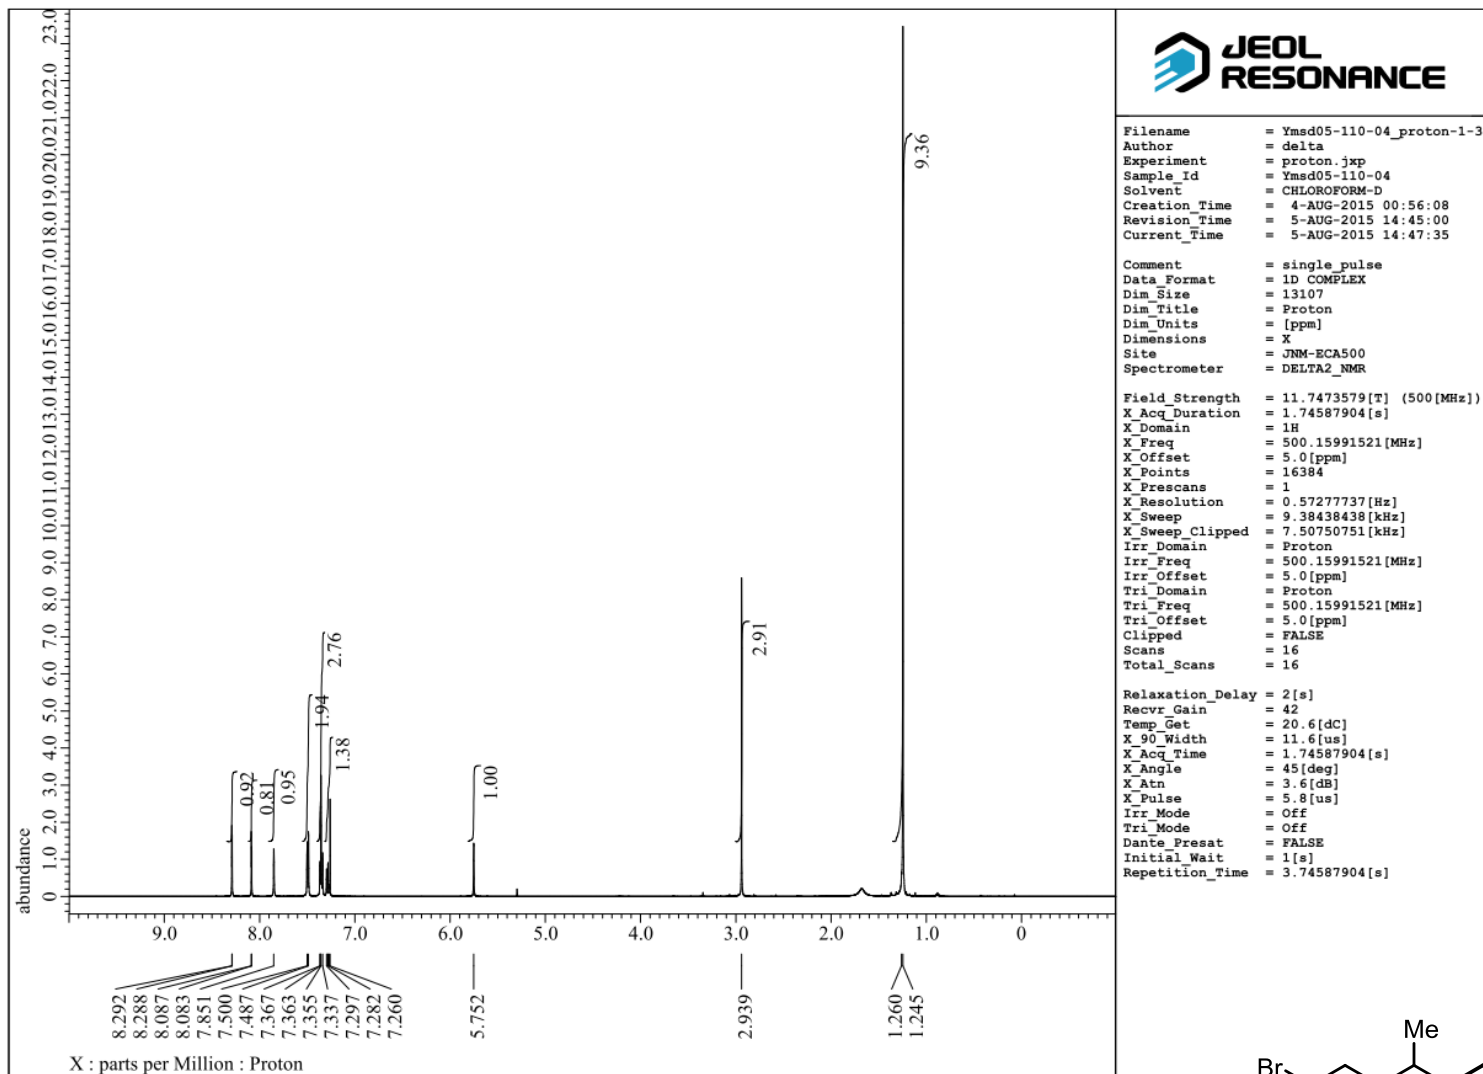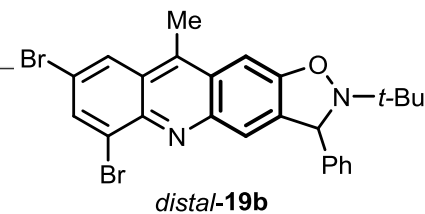

You created this PDF from an application that is not licensed to print to novaPDF printer (<http://www.novapdf.com>)

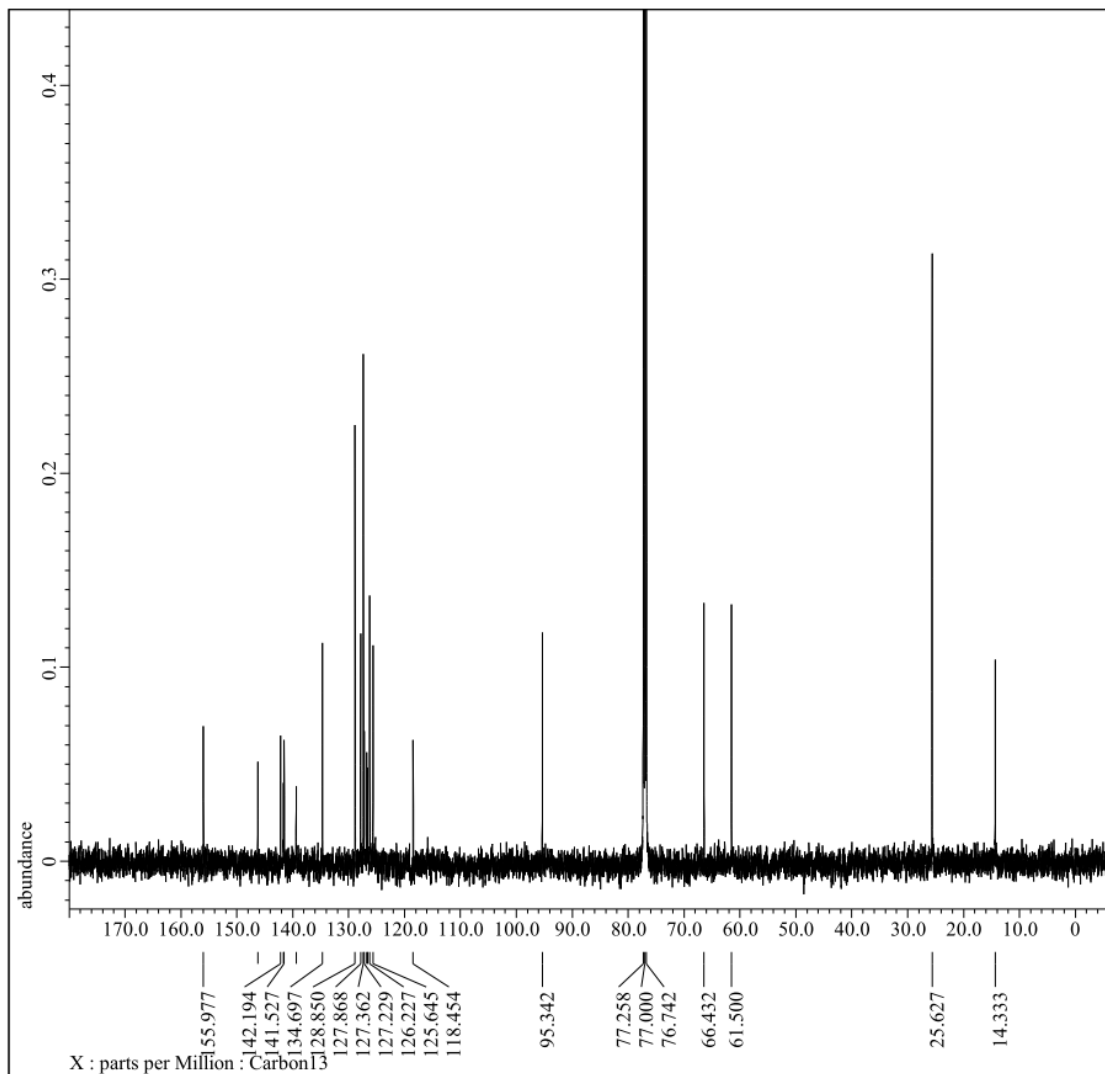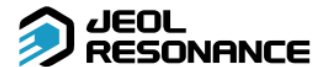

```

Filename      = Ymsd05-110-04_Carbon-1-3
Author       = delta
Experiment   = carbon.jsp
Sample_Id    = Ymsd05-110-04
Solvent      = CHLOROFORM-D
Creation_Time = 4-AUG-2015 01:00:00
Revision_Time = 5-AUG-2015 14:50:51
Current_Time = 5-AUG-2015 14:50:59

Comment      = single pulse decoupled g
Data_Format  = 1D COMPLEX
Dim_Size     = 26214
Dim_Title    = Carbon13
Dim_Units    = [ppm]
Dimensions   = X
Site         = JNM-ECA500
Spectrometer = DELTA2_NMR

Field_Strength = 11.7473579[T] (500[MHz])
X_Acq_Duration = 0.83361792[s]
X_Domain      = 13C
X_Freq        = 125.76529768[MHz]
X_Offset      = 100[ppm]
X_Points      = 32768
X_Prescans    = 4
X_Resolution  = 1.19959034[Hz]
X_Sweep       = 39.3081761[kHz]
X_Sweep_Clip  = 31.44654088[kHz]
Irr_Domain    = Proton
Irr_Freq      = 500.15991521[MHz]
Irr_Offset    = 5.0[ppm]
Clipped       = FALSE
Scans         = 359
Total_Scans   = 359

Relaxation_Delay = 2.5[s]
Recvr_Gain       = 60
Temp_Get         = 21.1[dC]
X_90_Width      = 9.6[us]
X_Acq_Time      = 0.83361792[s]
X_Angle         = 30[deg]
X_Atn           = 4.1[dB]
X_Pulse         = 3.2[us]
Irr_Atn_Dec     = 21.587[dB]
Irr_Atn_No     = 21.587[dB]
Irr_Noise      = WALTZ
Irr_Pwidth     = 92[us]
Decoupling      = TRUE
Initial_Wait    = 1[s]
Noe             = TRUE
Noe_Time        = 2.5[s]
Repetition_Time = 3.33361792[s]

```

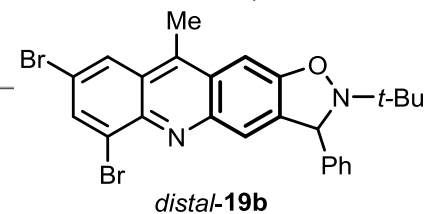

You created this PDF from an application that is not licensed to print to novaPDF printer (<http://www.novapdf.com>)

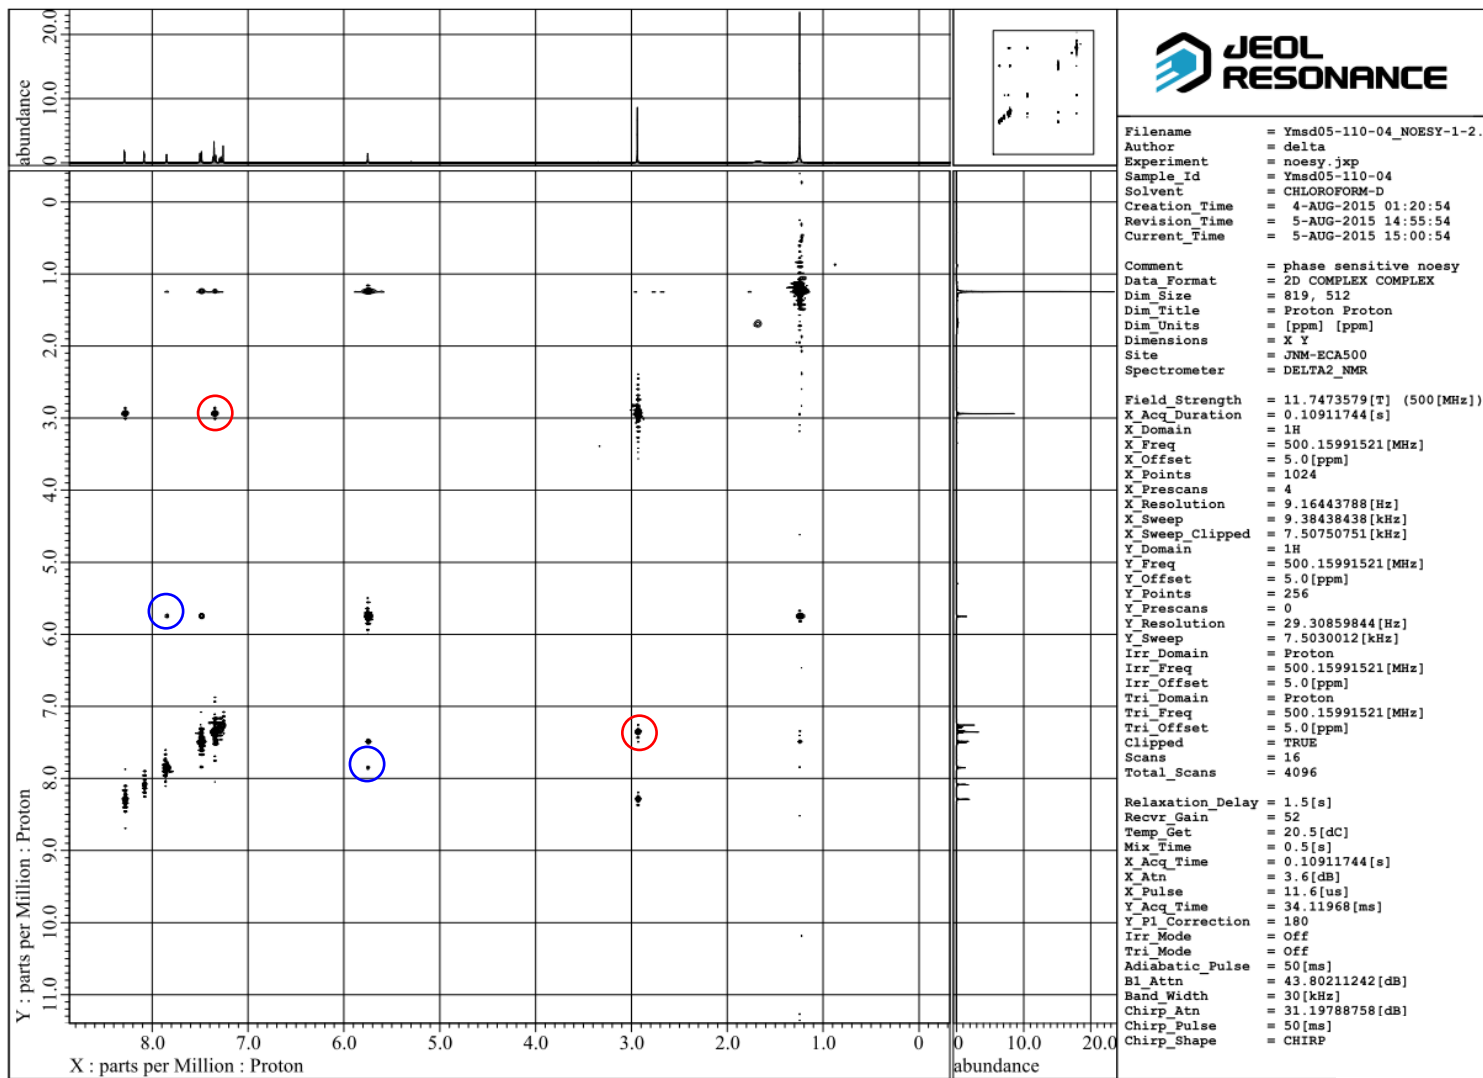

You created this PDF from an application that is not licensed to print to novaPDF printer (<http://www.novapdf.com>)

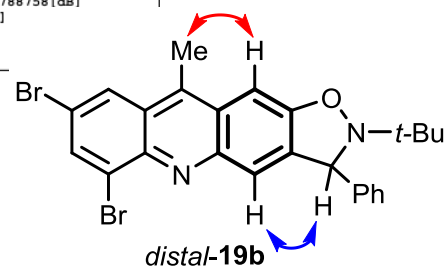

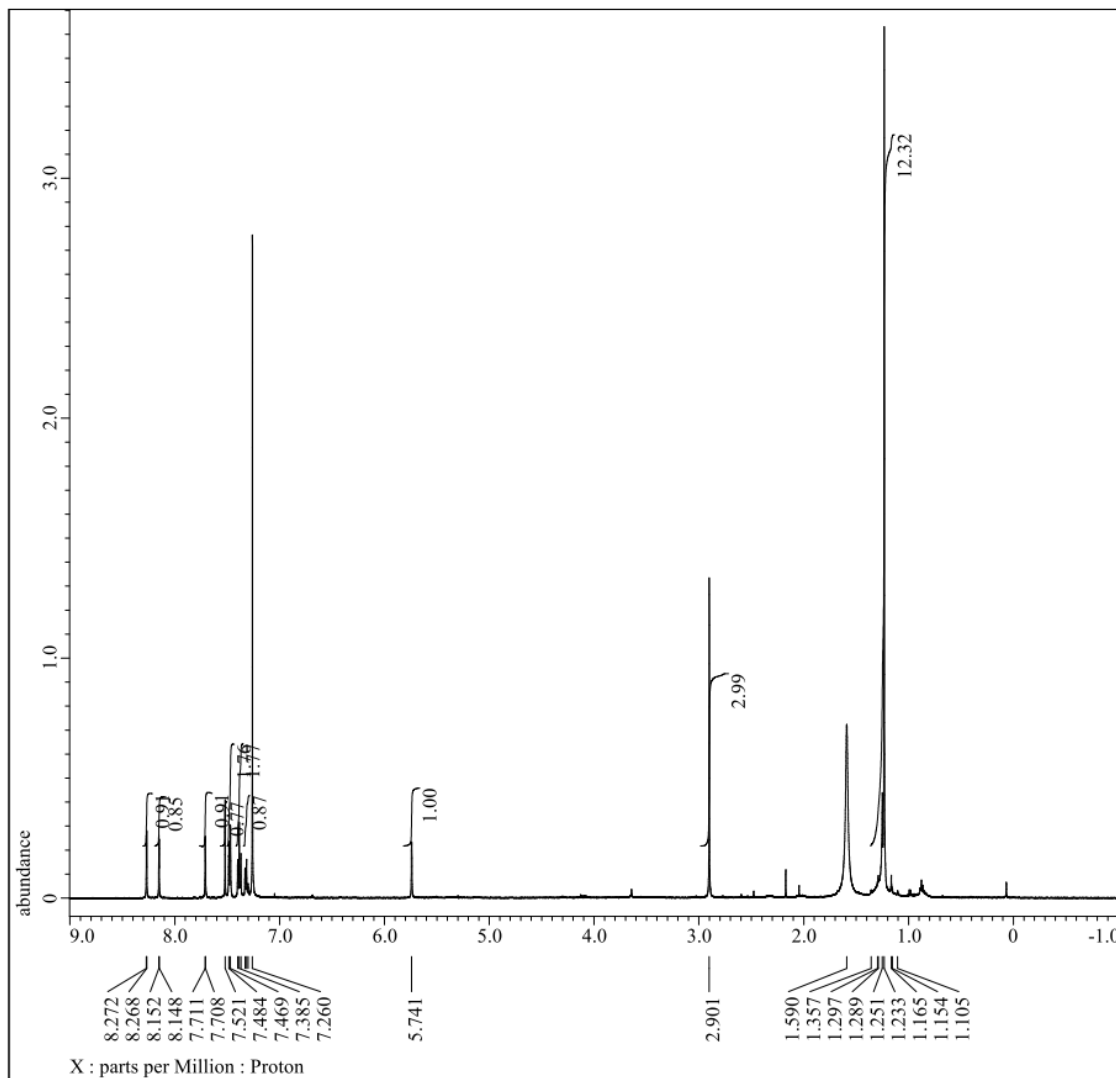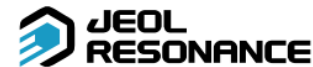

```

Filename      = Ymsd05-0452-05minor_prot
Author       = delta
Experiment   = proton_jxp
Sample_Id    = Ymsd05-0452-05minor
Solvent      = CHLOROFORM-D
Creation_Time = 3-JUN-2015 00:16:38
Revision_Time = 5-AUG-2015 15:22:51
Current_Time  = 5-AUG-2015 15:23:13

Comment      = single pulse
Data Format   = 1D COMPLEX
Dim_Size     = 26214
Dim_Title    = Proton
Dim_Units    = [ppm]
Dimensions   = X
Site         = JNM-ECA500
Spectrometer = DELTA2_NMR

Field Strength = 11.7473579[T] (500[MHz])
X_Acq_Duration = 3.49175808[s]
X_Domain      = 1H
X_Freq        = 500.15991521[MHz]
X_Offset      = 5.0[ppm]
X_Points      = 32768
X_Prescans    = 1
X_Resolution  = 0.28638868[Hz]
X_Sweep       = 9.38438438[kHz]
X_Sweep_Clipped = 7.50750751[kHz]
Irr_Domain    = Proton
Irr_Freq      = 500.15991521[MHz]
Irr_Offset    = 5.0[ppm]
Tri_Domain    = Proton
Tri_Freq      = 500.15991521[MHz]
Tri_Offset    = 5.0[ppm]
Clipped       = FALSE
Scans         = 8
Total_Scans   = 8

Relaxation_Delay = 2[s]
Recvr_Gain       = 50
Temp_Get         = 21[dc]
X_90_Width      = 11.6[us]
X_Acq_Time      = 3.49175808[s]
X_Angle         = 45[deg]
X_Atn           = 3.6[db]
X_Pulse         = 5.8[us]
Irr_Mode        = Off
Tri_Mode        = Off
Dante_Presat    = FALSE
Initial_Wait    = 1[s]
Repetition_Time = 5.49175808[s]

```

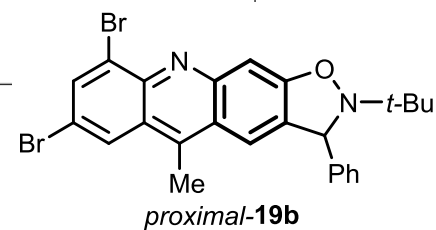

You created this PDF from an application that is not licensed to print to novaPDF printer (<http://www.novapdf.com>)

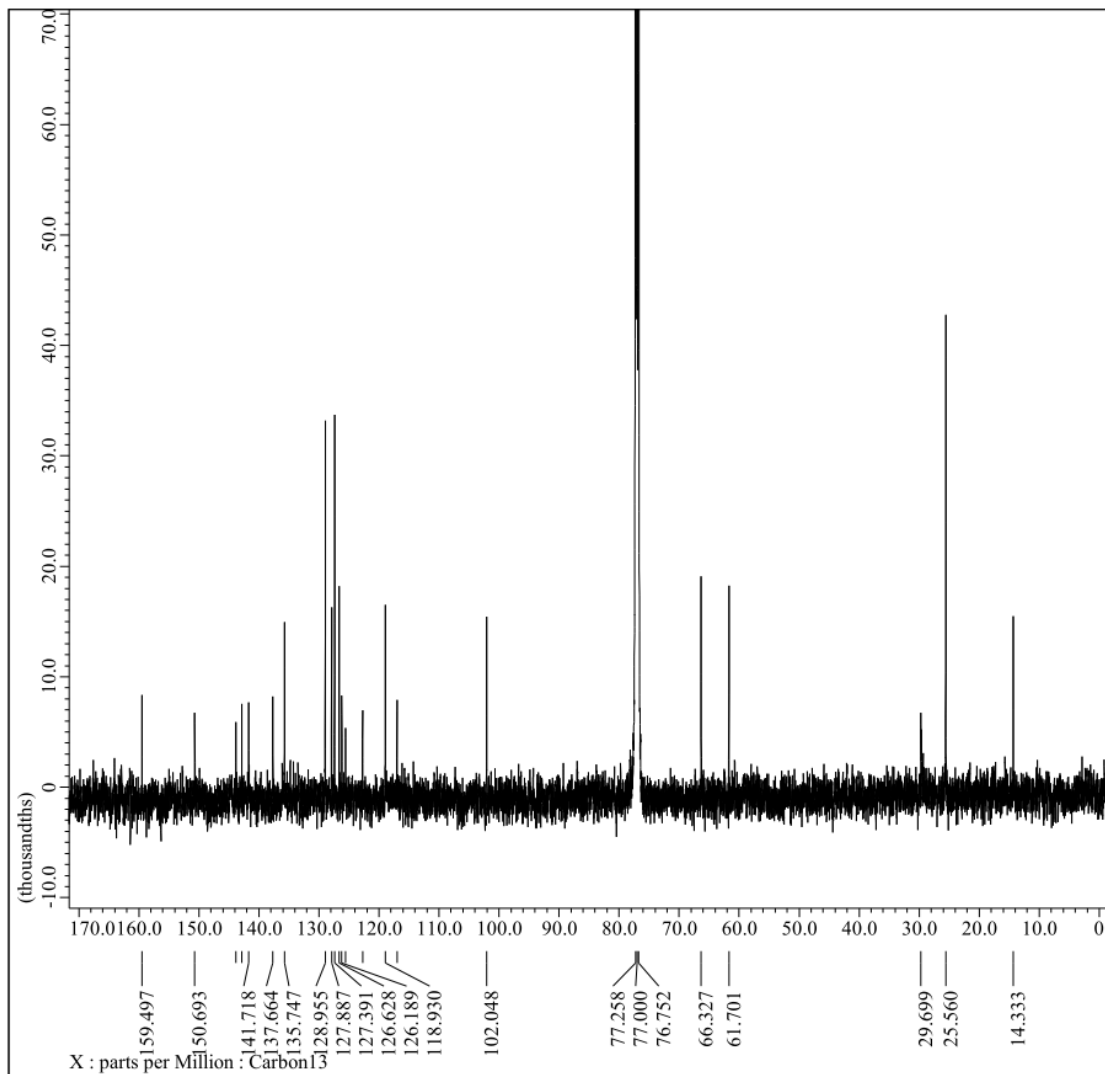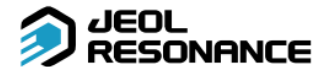

```

Filename      = Ymsd05-0452-05minor_Carb
Author       = delta
Experiment   = carbon_jxp
Sample Id    = Ymsd05-0452-05minor
Solvent      = CHLOROFORM-D
Creation Time = 3-JUN-2015 00:19:45
Revision Time = 5-AUG-2015 15:25:17
Current Time  = 5-AUG-2015 15:25:31

Comment      = single pulse decoupled g
Data Format   = 1D COMPLEX
Dim Size     = 26214
Dim Title    = Carbon13
Dim Units    = [ppm]
Dimensions   = X
Site         = JNM-ECA500
Spectrometer = DELTA2_NMR

Field Strength = 11.7473579[T] (500[MHz])
X Acq Duration = 0.83361792[s]
X Domain      = 13C
X Freq       = 125.76529768 [MHz]
X Offset     = 100[ppm]
X Points     = 32768
X Prescans   = 4
X Resolution = 1.19959034 [Hz]
X Sweep     = 39.3081761 [kHz]
X Sweep Clipped = 31.44654088 [kHz]
Irr Domain   = Proton
Irr Freq    = 500.15991521 [MHz]
Irr Offset  = 5.0[ppm]
Clipped     = FALSE
Scans       = 6000
Total Scans = 6000

Relaxation Delay = 2[s]
Recvr Gain      = 60
Temp Get       = 21.2[dC]
X 90 Width     = 9.6[us]
X Acq Time     = 0.83361792[s]
X Angle       = 30[deg]
X Atn         = 4.1[dB]
X Pulse       = 3.2[us]
Irr Atn Dec   = 21.587[dB]
Irr Atn Noe   = 21.587[dB]
Irr Noise     = WALTZ
Irr Pwidth    = 92[us]
Decoupling    = TRUE
Initial Wait  = 1[s]
Noe           = TRUE
Noe Time      = 2[s]
Repetition Time = 2.83361792[s]

```

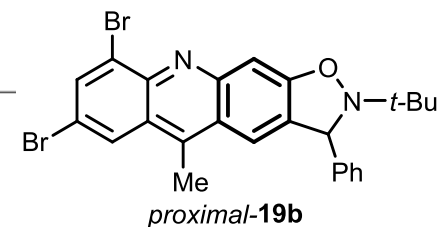

You created this PDF from an application that is not licensed to print to novaPDF printer (<http://www.novapdf.com>)

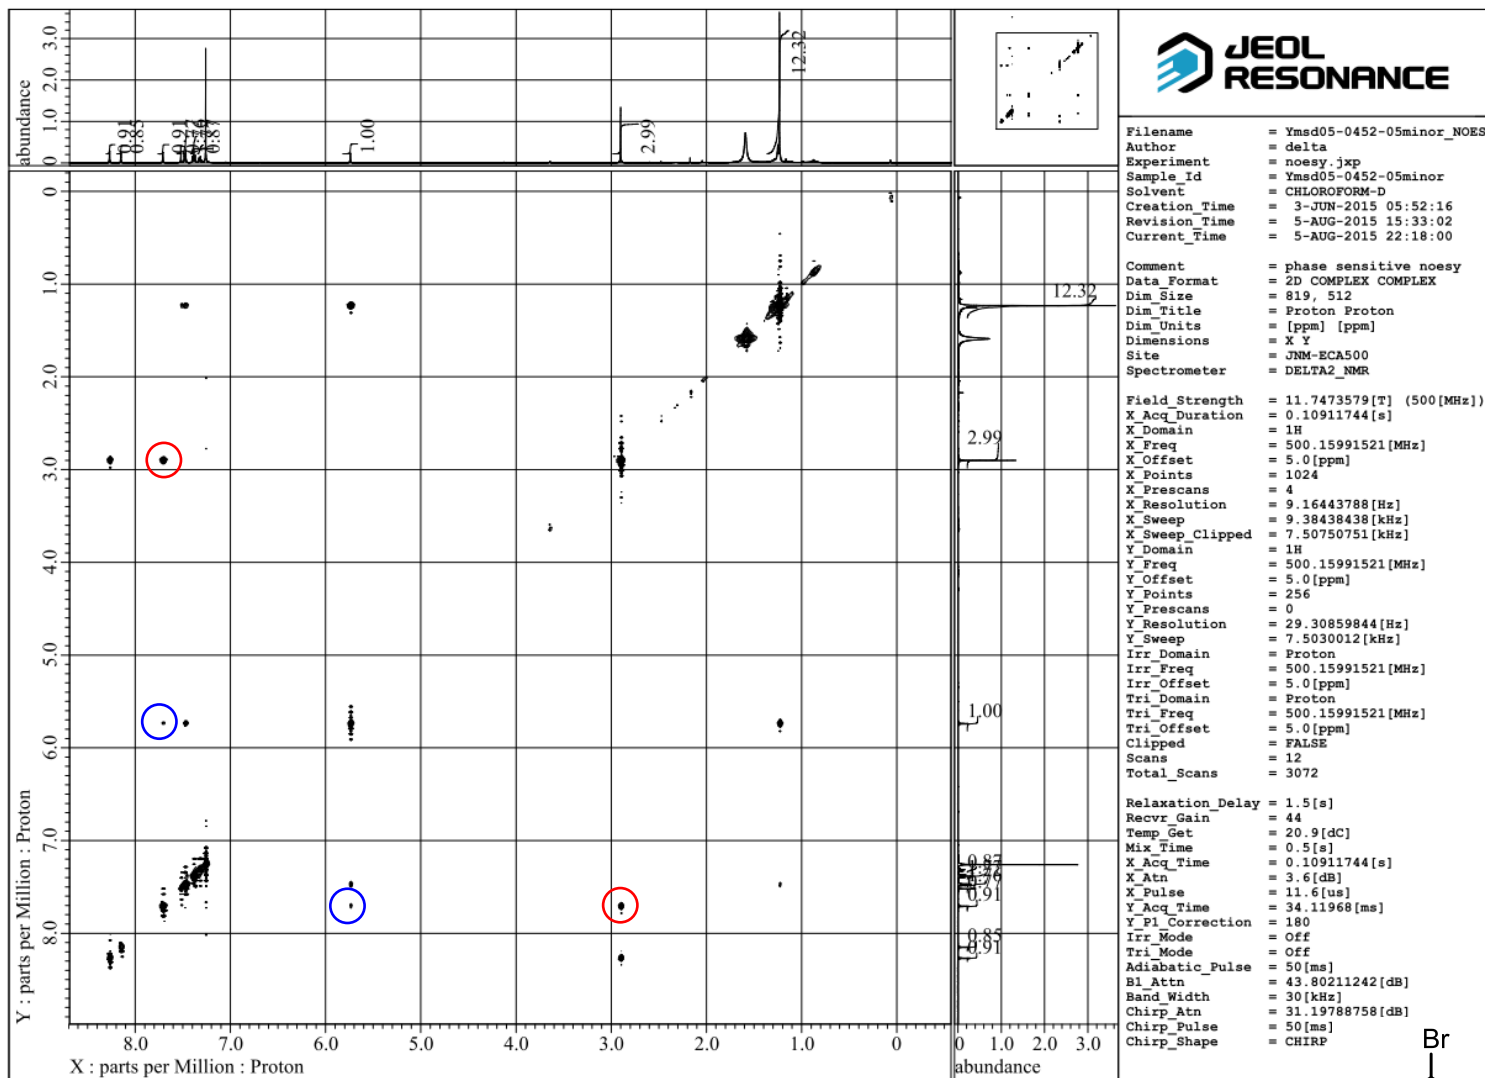

You created this PDF from an application that is not licensed to print to novaPDF printer (<http://www.novapdf.com>)

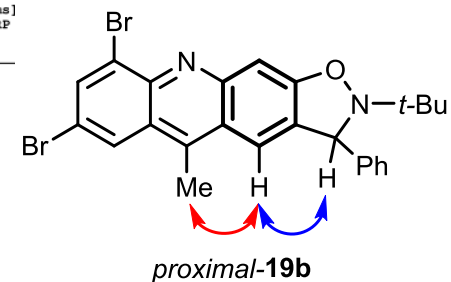

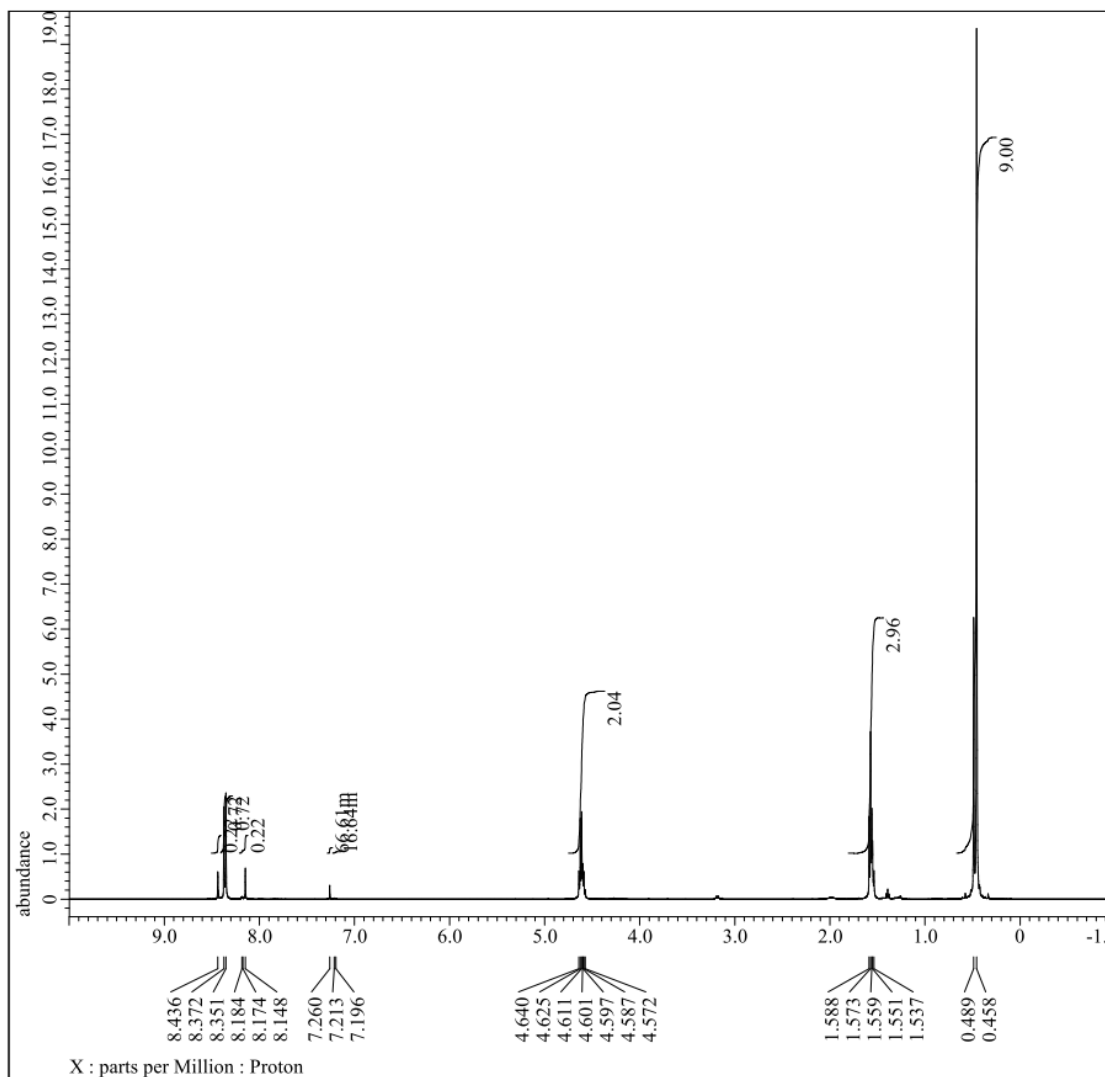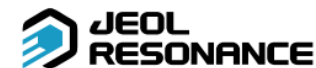

Filename = Ymsd04-175-06\_proton-1-4  
 Author = delta  
 Experiment = proton.jxp  
 Sample Id = Ymsd04-175-06  
 Solvent = CHLOROFORM-D  
 Creation Time = 16-APR-2015 02:01:35  
 Revision Time = 29-MAY-2015 18:45:23  
 Current Time = 29-MAY-2015 18:47:37

Comment = single pulse  
 Data Format = 1D COMPLEX  
 Dim Size = 13107  
 Dim Title = Proton  
 Dim Units = [ppm]  
 Dimensions = X  
 Site = JNM-ECA500  
 Spectrometer = DELTA2\_NMR

Field Strength = 11.7473579 [T] (500 [MHz])  
 X\_Acq\_Duration = 1.74587904 [s]  
 X\_Domain = 1H  
 X\_Freq = 500.15991521 [MHz]  
 X\_Offset = 5.0 [ppm]  
 X\_Points = 16384  
 X\_Prescans = 1  
 X\_Resolution = 0.57277737 [Hz]  
 X\_Sweep = 9.38438438 [kHz]  
 X\_Sweep\_Clipped = 7.50750751 [kHz]  
 Irr\_Domain = Proton  
 Irr\_Freq = 500.15991521 [MHz]  
 Irr\_Offset = 5.0 [ppm]  
 Tri\_Domain = Proton  
 Tri\_Freq = 500.15991521 [MHz]  
 Tri\_Offset = 5.0 [ppm]  
 Clipped = FALSE  
 Scans = 8  
 Total Scans = 8

Relaxation\_Delay = 2 [s]  
 Recvr\_Gain = 30  
 Temp\_Get = 17.7 [dC]  
 X\_90\_Width = 11.6 [us]  
 X\_Acq\_Time = 1.74587904 [s]  
 X\_Angle = 45 [deg]  
 X\_Atn = 3.6 [dB]  
 X\_Pulse = 5.8 [us]  
 Irr\_Mode = Off  
 Tri\_Mode = Off  
 Dante\_Presat = FALSE  
 Initial\_Wait = 1 [s]  
 Repetition\_Time = 3.74587904 [s]

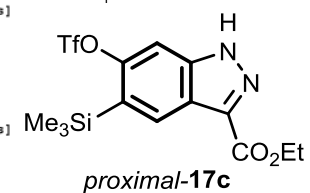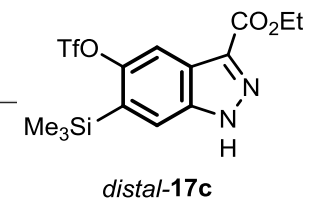

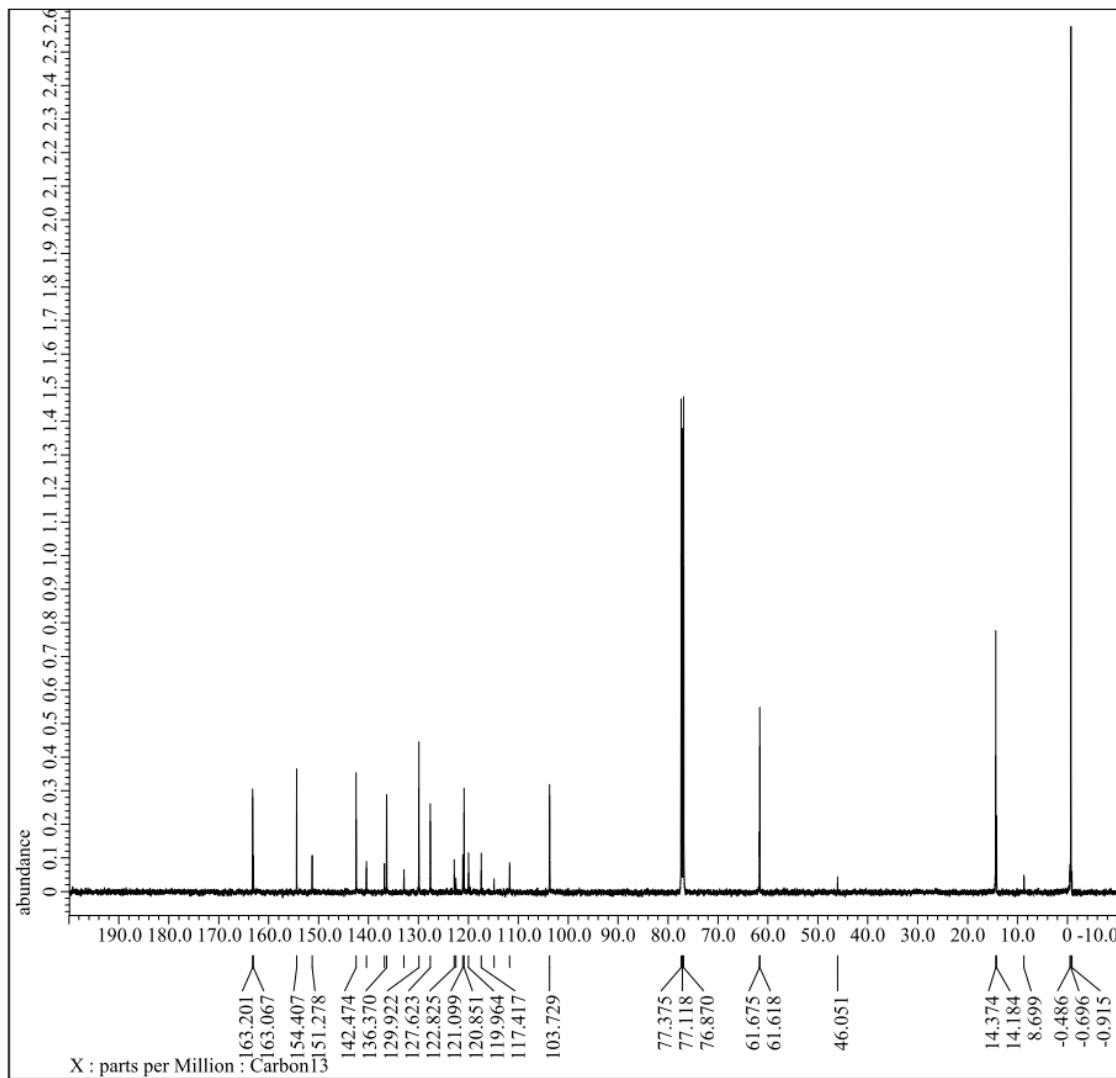

```

Filename      = Ymsd04-175-06_Carbon-1-2
Author       = delta
Experiment   = carbon_jxp
Sample_Id    = Ymsd04-175-06
Solvent      = CHLOROFORM-D
Creation_Time = 16-APR-2015 02:05:50
Revision_Time = 29-MAY-2015 18:49:27
Current_Time  = 29-MAY-2015 18:50:27

Comment      = single pulse decoupled g
Data Format   = 1D COMPLEX
Dim Size     = 26214
Dim Title    = Carbon13
Dim Units    = [ppm]
Dimensions   = X
Site         = JNM-ECA500
Spectrometer = DELTA2_NMR

Field_Strength = 11.7473579[T] (500[MHz])
X_Acq_Duration = 0.83361792[s]
X_Domain       = 13C
X_Freq         = 125.76529768[MHz]
X_Offset       = 100[ppm]
X_Points       = 32768
X_Prescans     = 4
X_Resolution   = 1.19959034 [Hz]
X_Sweep        = 39.3081761 [kHz]
X_Sweep_Clipped = 31.44654088 [kHz]
Irr_Domain     = Proton
Irr_Freq       = 500.15991521[MHz]
Irr_Offset     = 5.0 [ppm]
Clipped        = TRUE
Scans          = 452.0
Total_Scans    = 452.0

Relaxation_Delay = 2[s]
Recvr_Gain       = 60
Temp_Get         = 17.9 [dC]
X_90_Width      = 9.6 [us]
X_Acq_Time       = 0.83361792[s]
X_Angle         = 30 [deg]
X_Atn           = 4.1 [dB]
X_Pulse         = 3.2 [us]
Irr_Atn_Dec     = 21.587 [dB]
Irr_Atn_Noise   = 21.587 [dB]
Irr_Noise       = WALTZ
Irr_Width       = 92 [us]
Decoupling      = TRUE
Initial_Wait    = 1 [s]
Noe              = TRUE
Noe_Time        = 2 [s]
Repetition_Time = 2.83361792 [s]

```

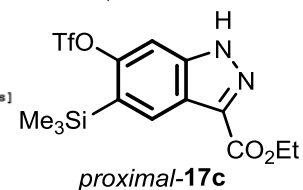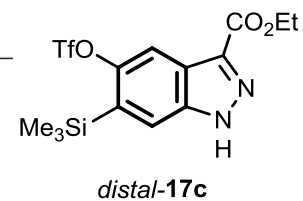

You created this PDF from an application that is not licensed to print to novaPDF printer (<http://www.novapdf.com>)



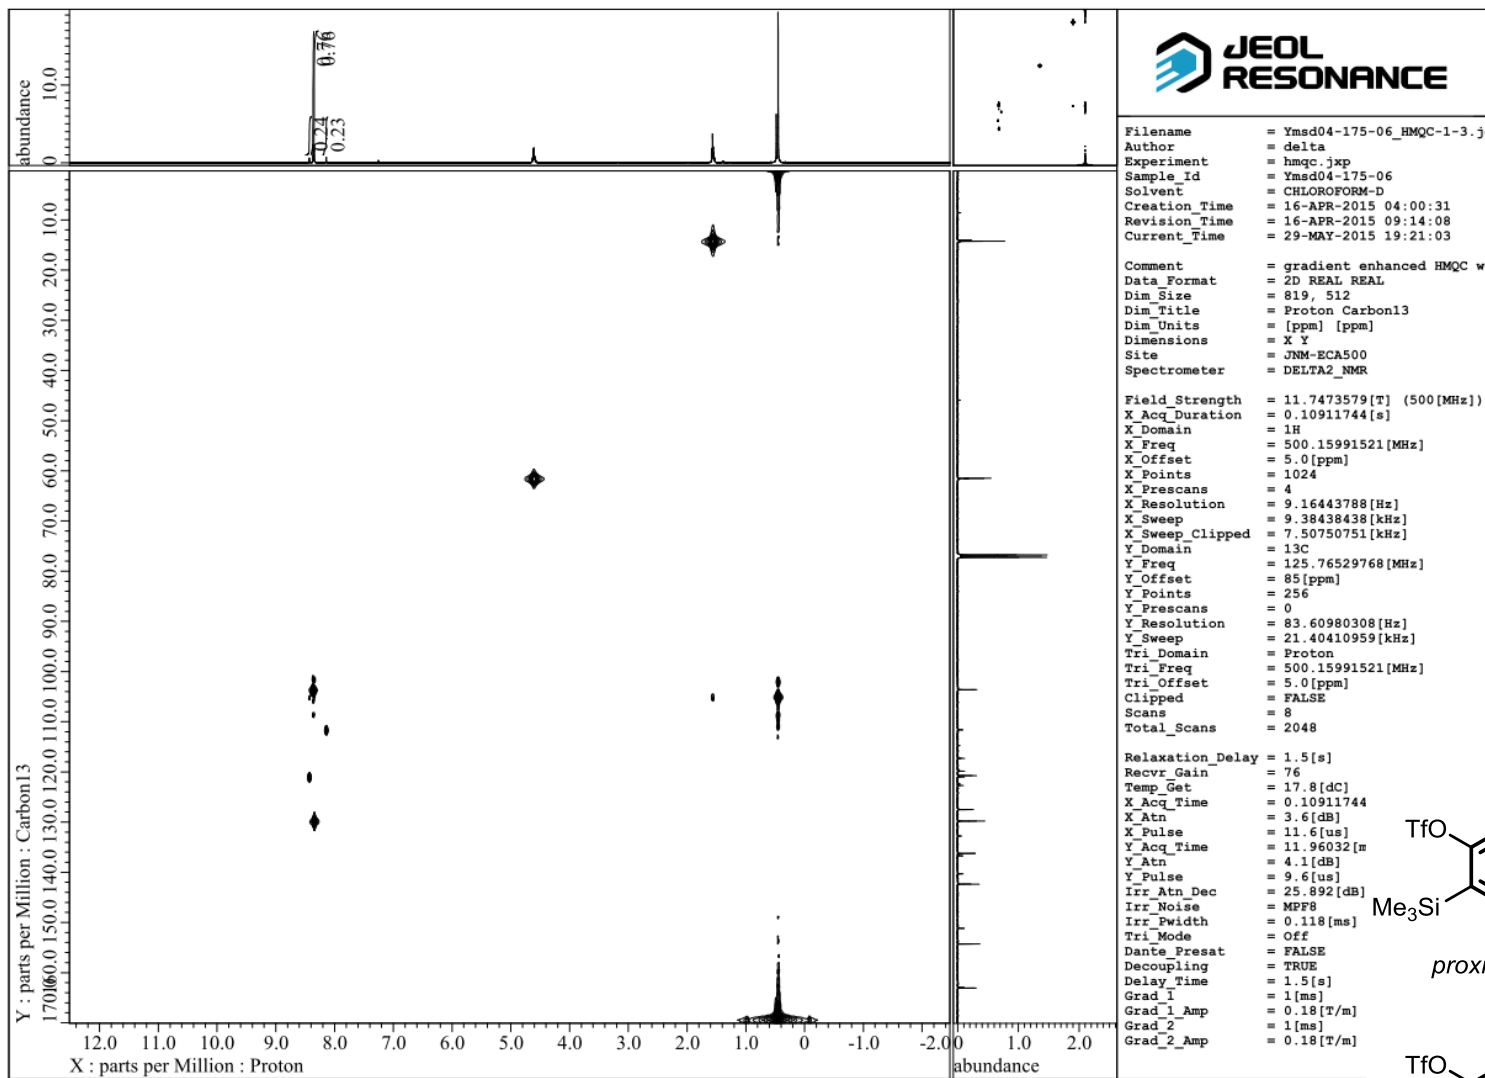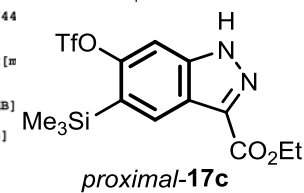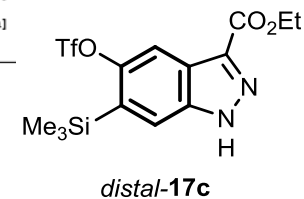

You created this PDF from an application that is not licensed to print to novaPDF printer (<http://www.novapdf.com>)

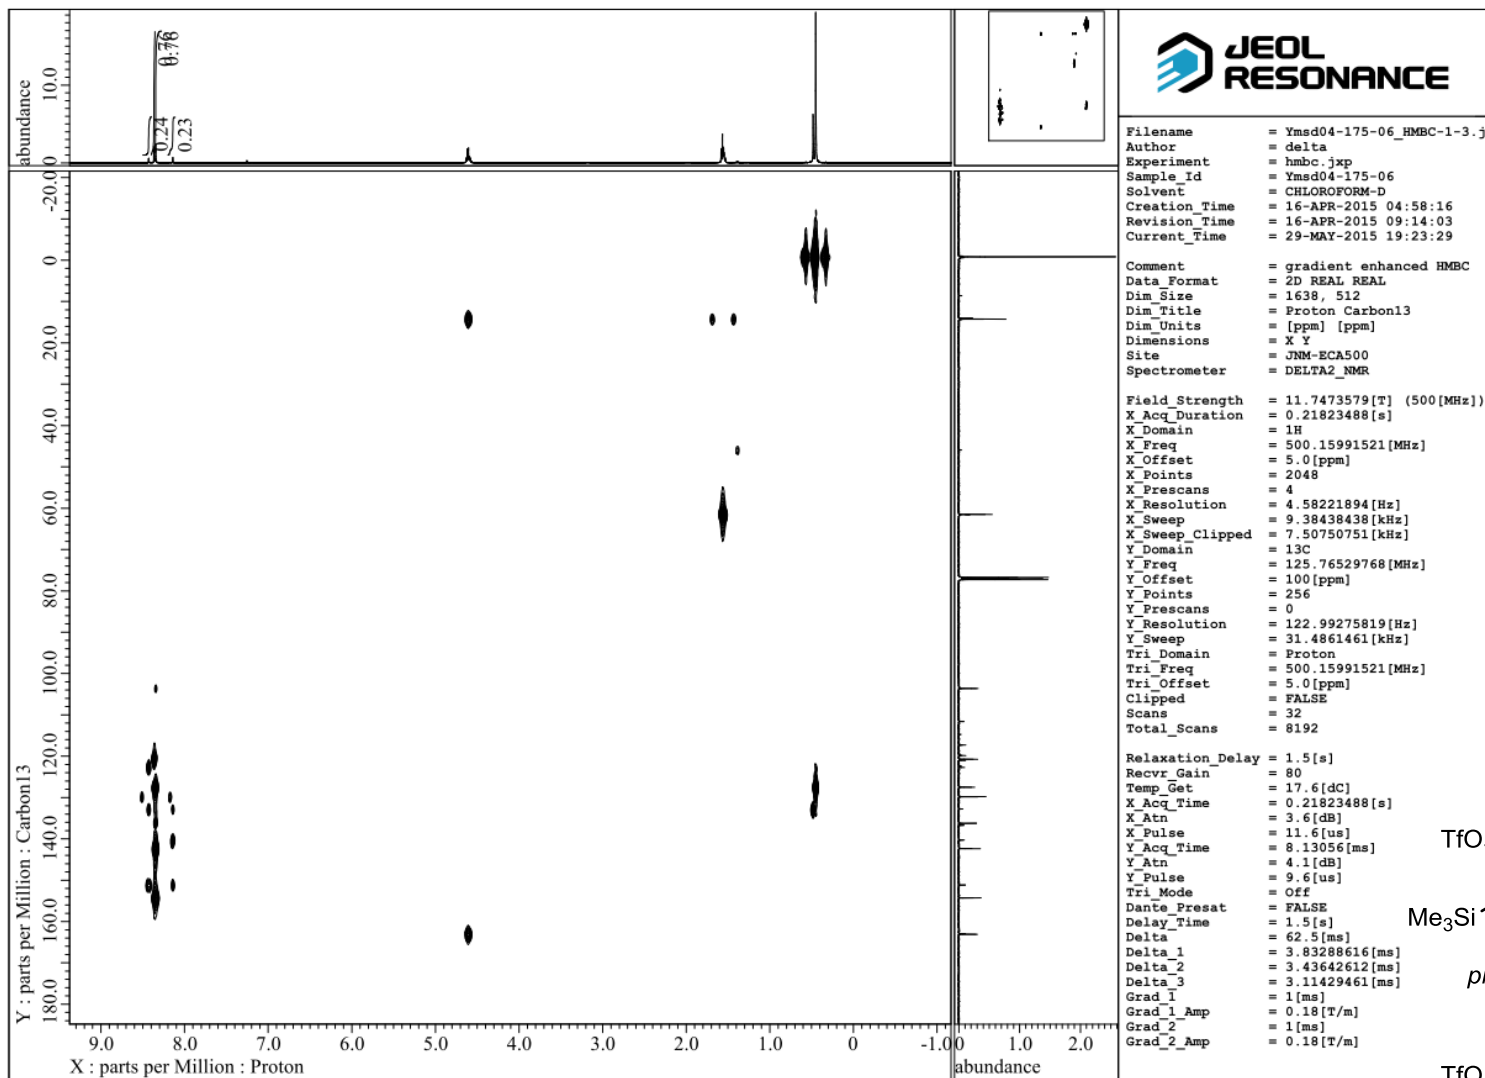

You created this PDF from an application that is not licensed to print to novaPDF printer (<http://www.novapdf.com>)

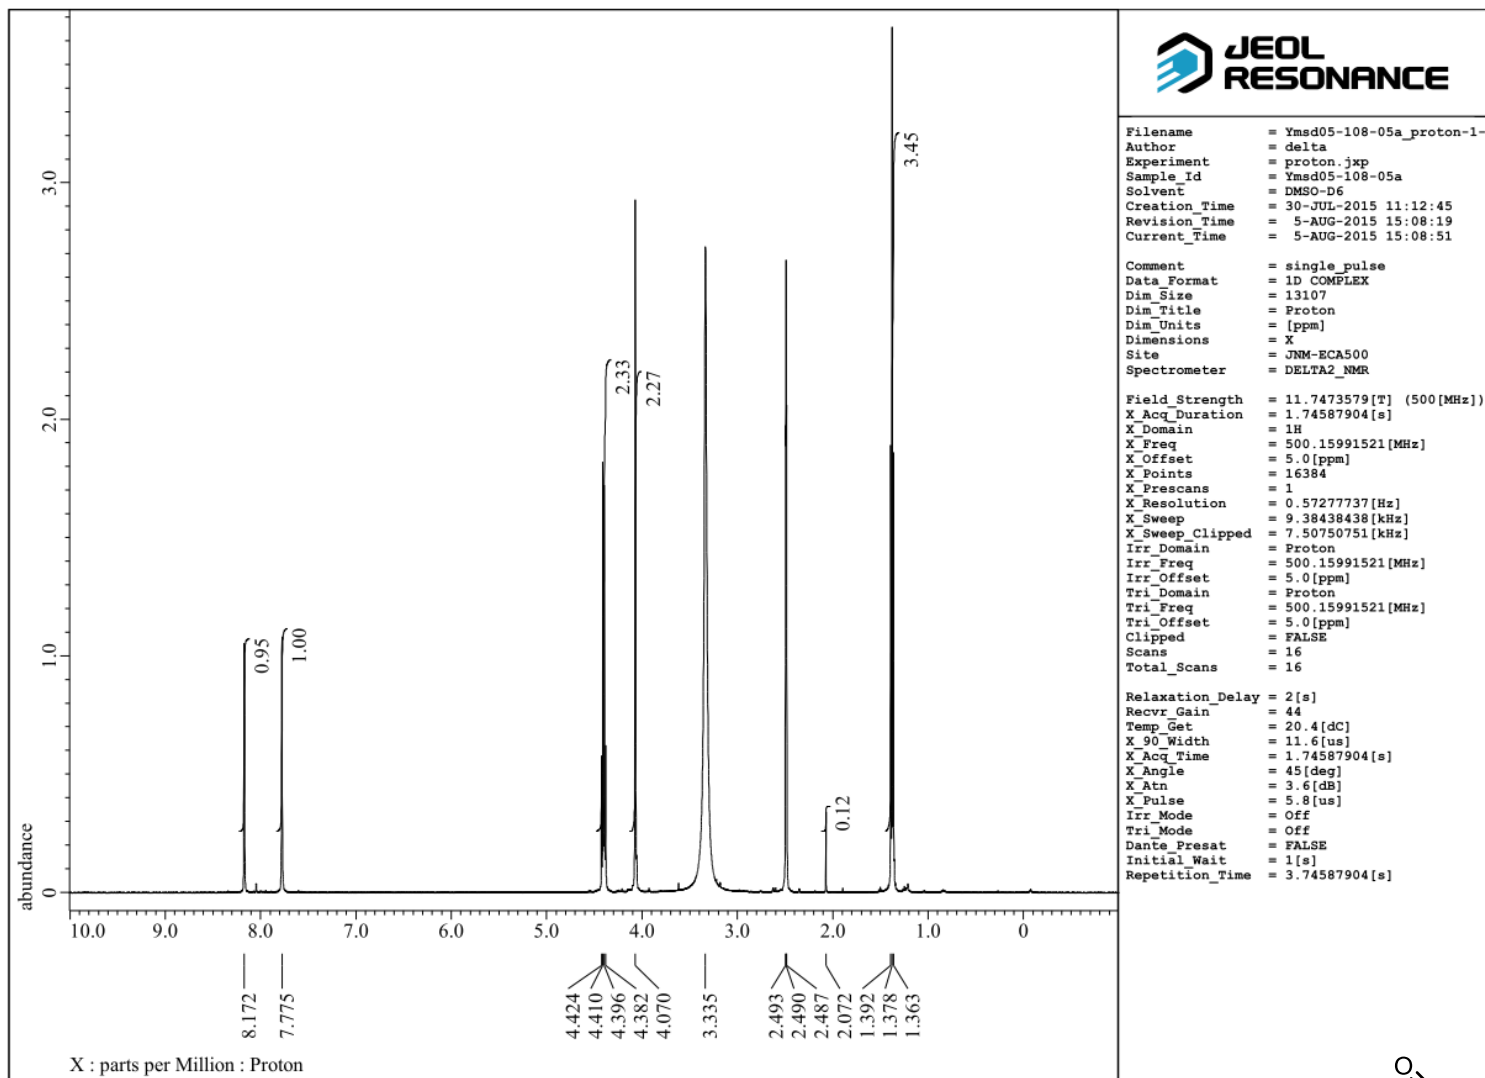

You created this PDF from an application that is not licensed to print to novaPDF printer (<http://www.novapdf.com>)

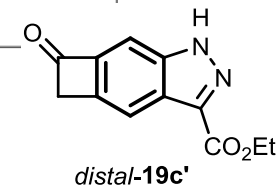

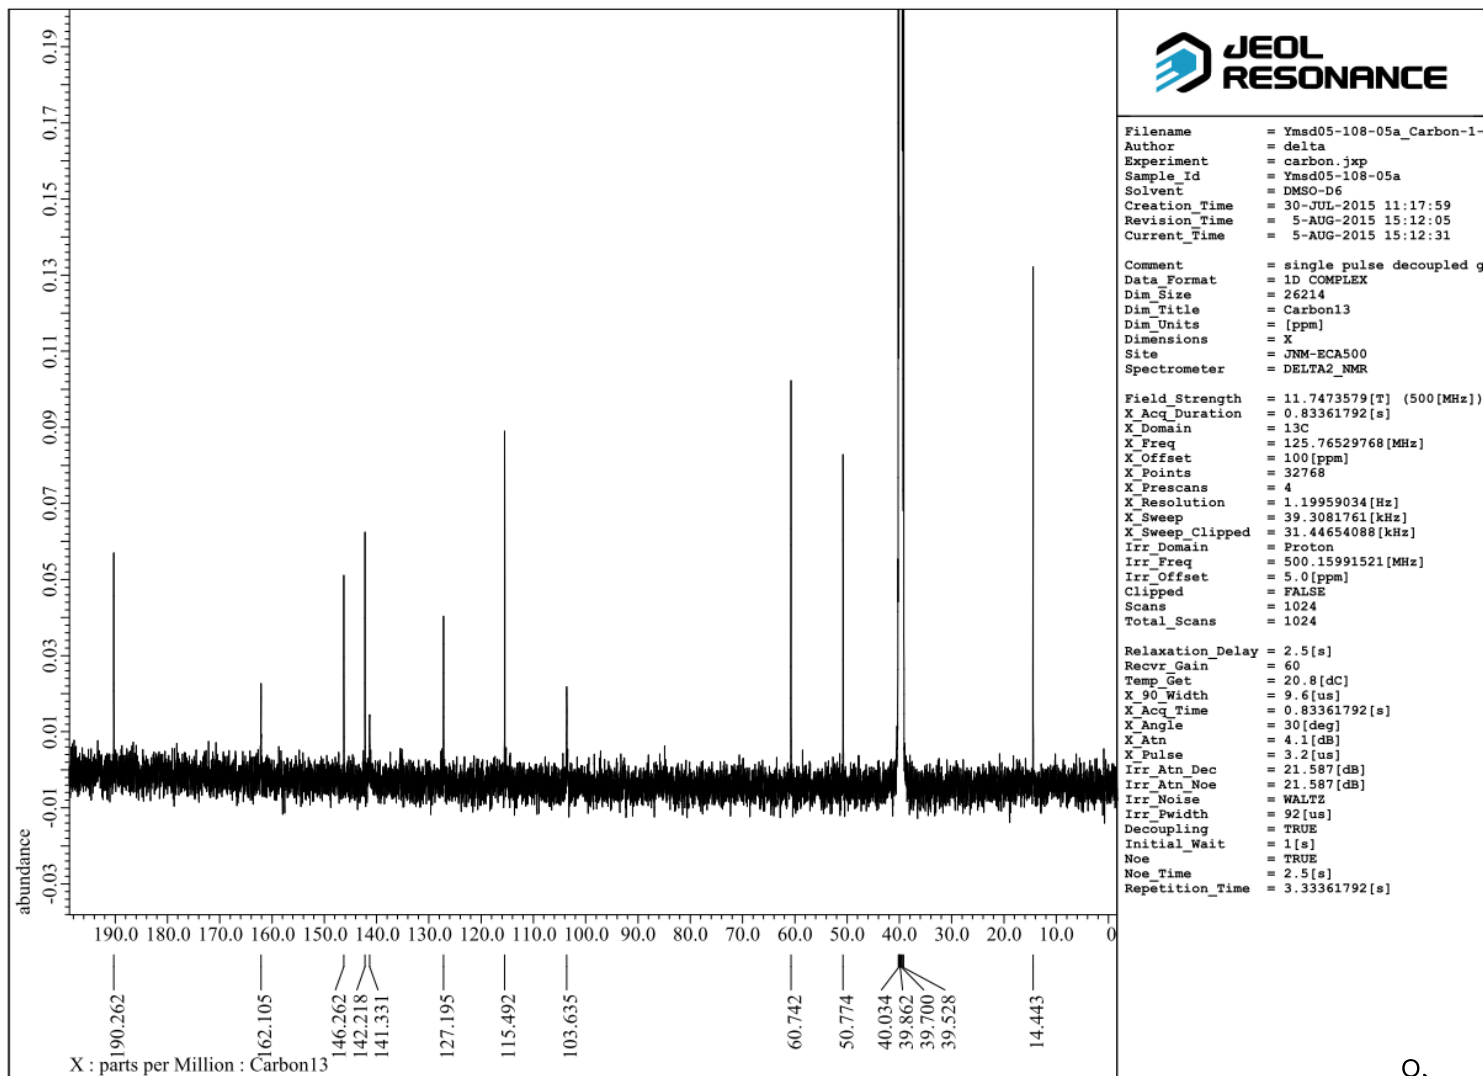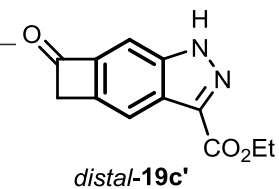

You created this PDF from an application that is not licensed to print to novaPDF printer (<http://www.novapdf.com>)

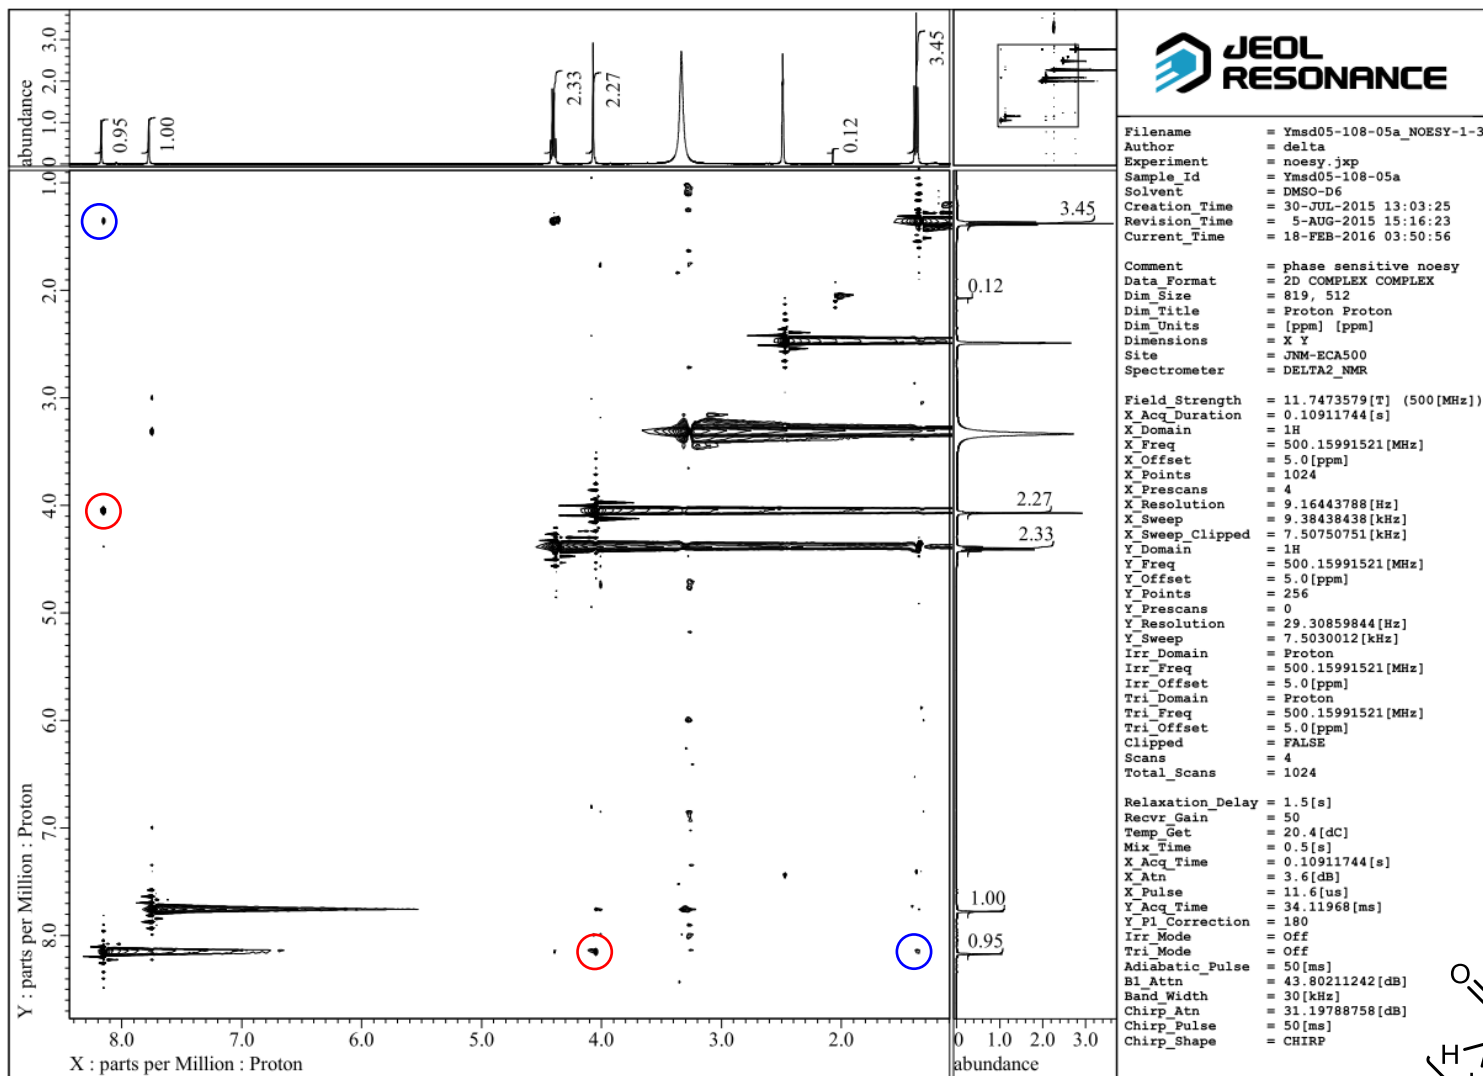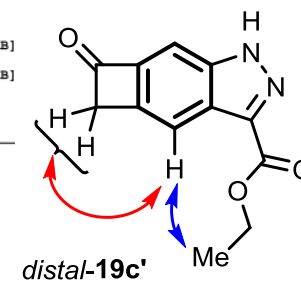

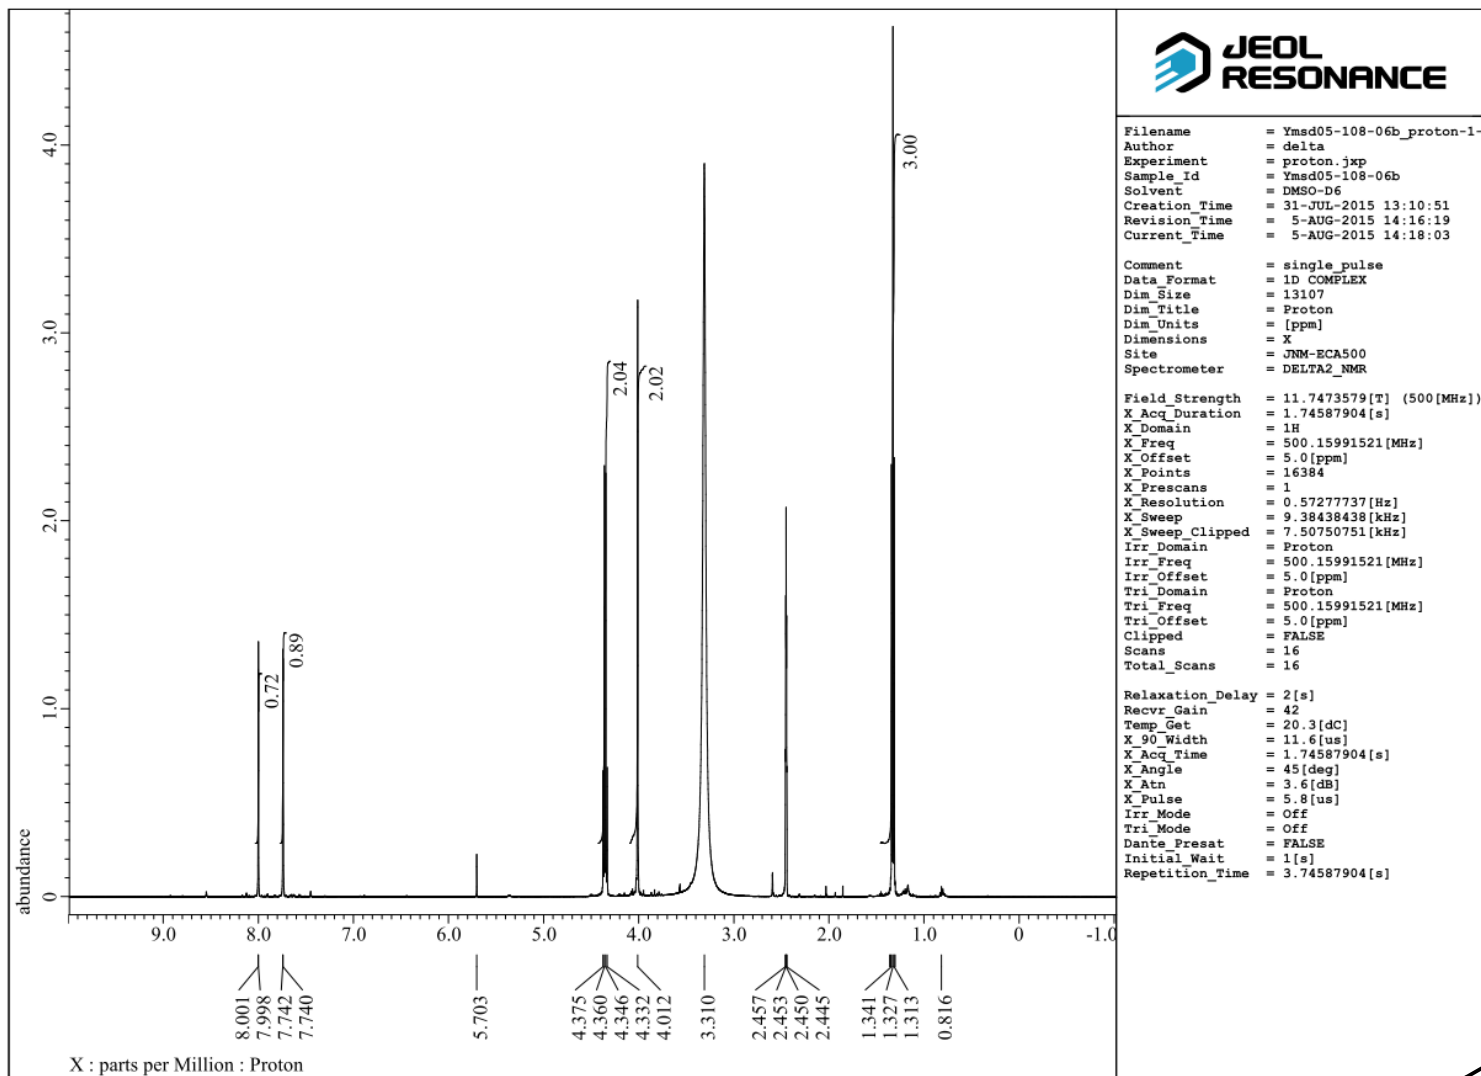

You created this PDF from an application that is not licensed to print to novaPDF printer (<http://www.novapdf.com>)

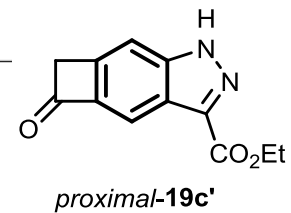

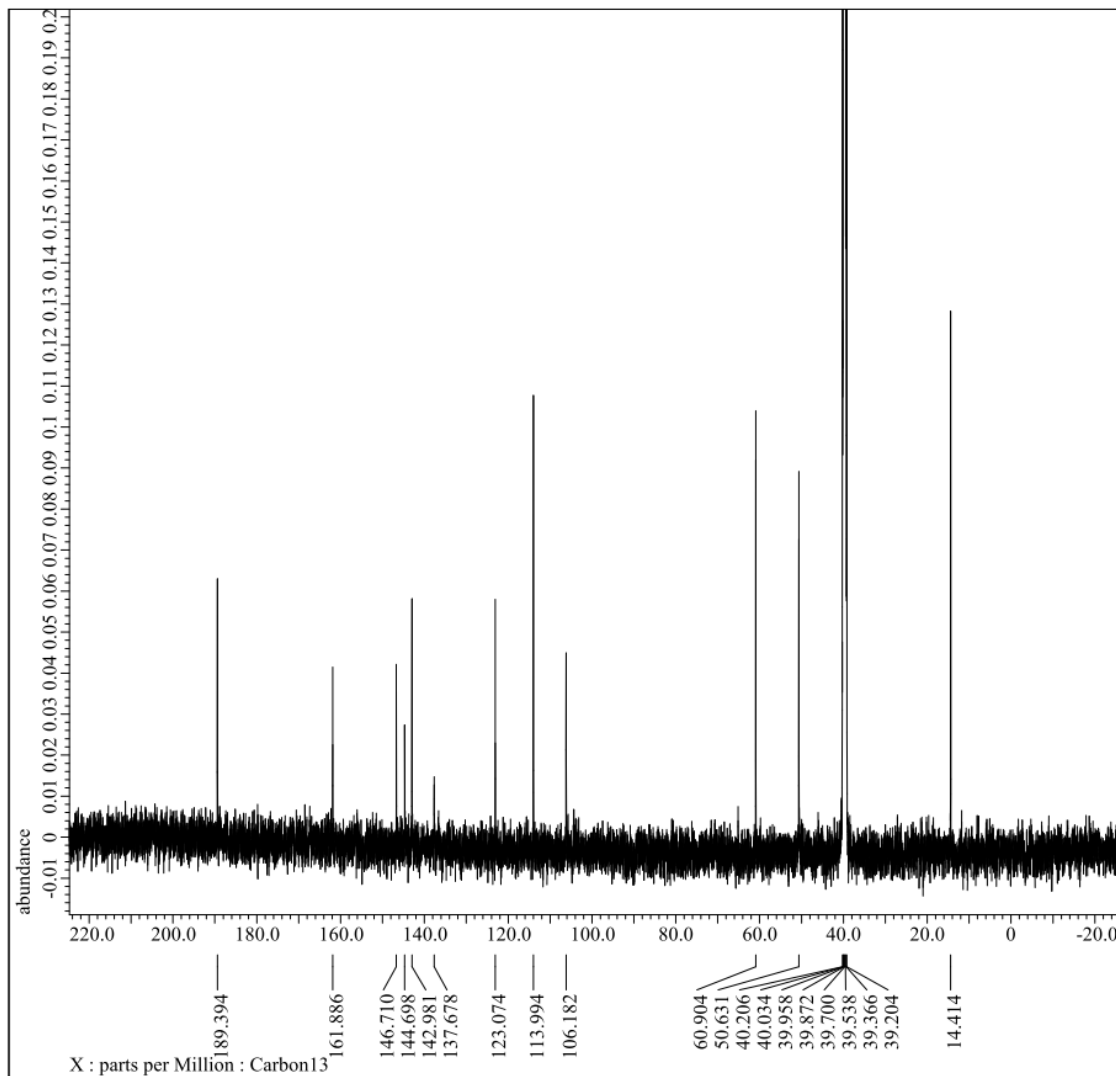

```

Filename      = Ymsd05-108-06b_Carbon-1-
Author       = delta
Experiment   = carbon_jxp
Sample_Id    = Ymsd05-108-06b
Solvent      = DMSO-D6
Creation_Time = 31-JUL-2015 13:16:29
Revision_Time = 5-AUG-2015 14:24:26
Current_Time  = 5-AUG-2015 14:25:27

Comment      = single pulse decoupled g
Data Format   = 1D COMPLEX
Dim_Size     = 26214
Dim_Title    = Carbon13
Dim_Units    = [ppm]
Dimensions   = X
Site         = JNM-ECA500
Spectrometer = DELTA2_NMR

Field_Strength = 11.7473579[T] (500[MHz])
X_Acq_Duration = 0.83361792[s]
X_Domain      = 13C
X_Freq        = 125.76529768[MHz]
X_Offset      = 100[ppm]
X_Points      = 32768
X_Prescans    = 4
X_Resolution  = 1.19959034 [Hz]
X_Sweep       = 39.3081761 [kHz]
X_Sweep_Clipped = 31.44654088 [kHz]
Irr_Domain    = Proton
Irr_Freq      = 500.15991521[MHz]
Irr_Offset    = 5.0 [ppm]
Clipped       = TRUE
Scans         = 851
Total_Scans   = 851

Relaxation_Delay = 2.5[s]
Recvr_Gain       = 60
Temp_Get         = 21[dC]
X_90_Width      = 9.6[us]
X_Acq_Time      = 0.83361792[s]
X_Angle         = 30[deg]
X_Atn           = 4.1[dB]
X_Pulse         = 3.2[us]
Irr_Atn_Dec     = 21.587 [dB]
Irr_Atn_Noise   = 21.587 [dB]
Irr_Noise       = WALTZ
Irr_Pwidth      = 92[us]
Decoupling      = TRUE
Initial_Wait    = 1[s]
Noe              = TRUE
Noe_Time        = 2.5[s]
Repetition_Time = 3.33361792[s]
  
```

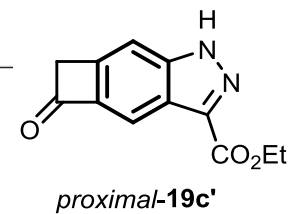

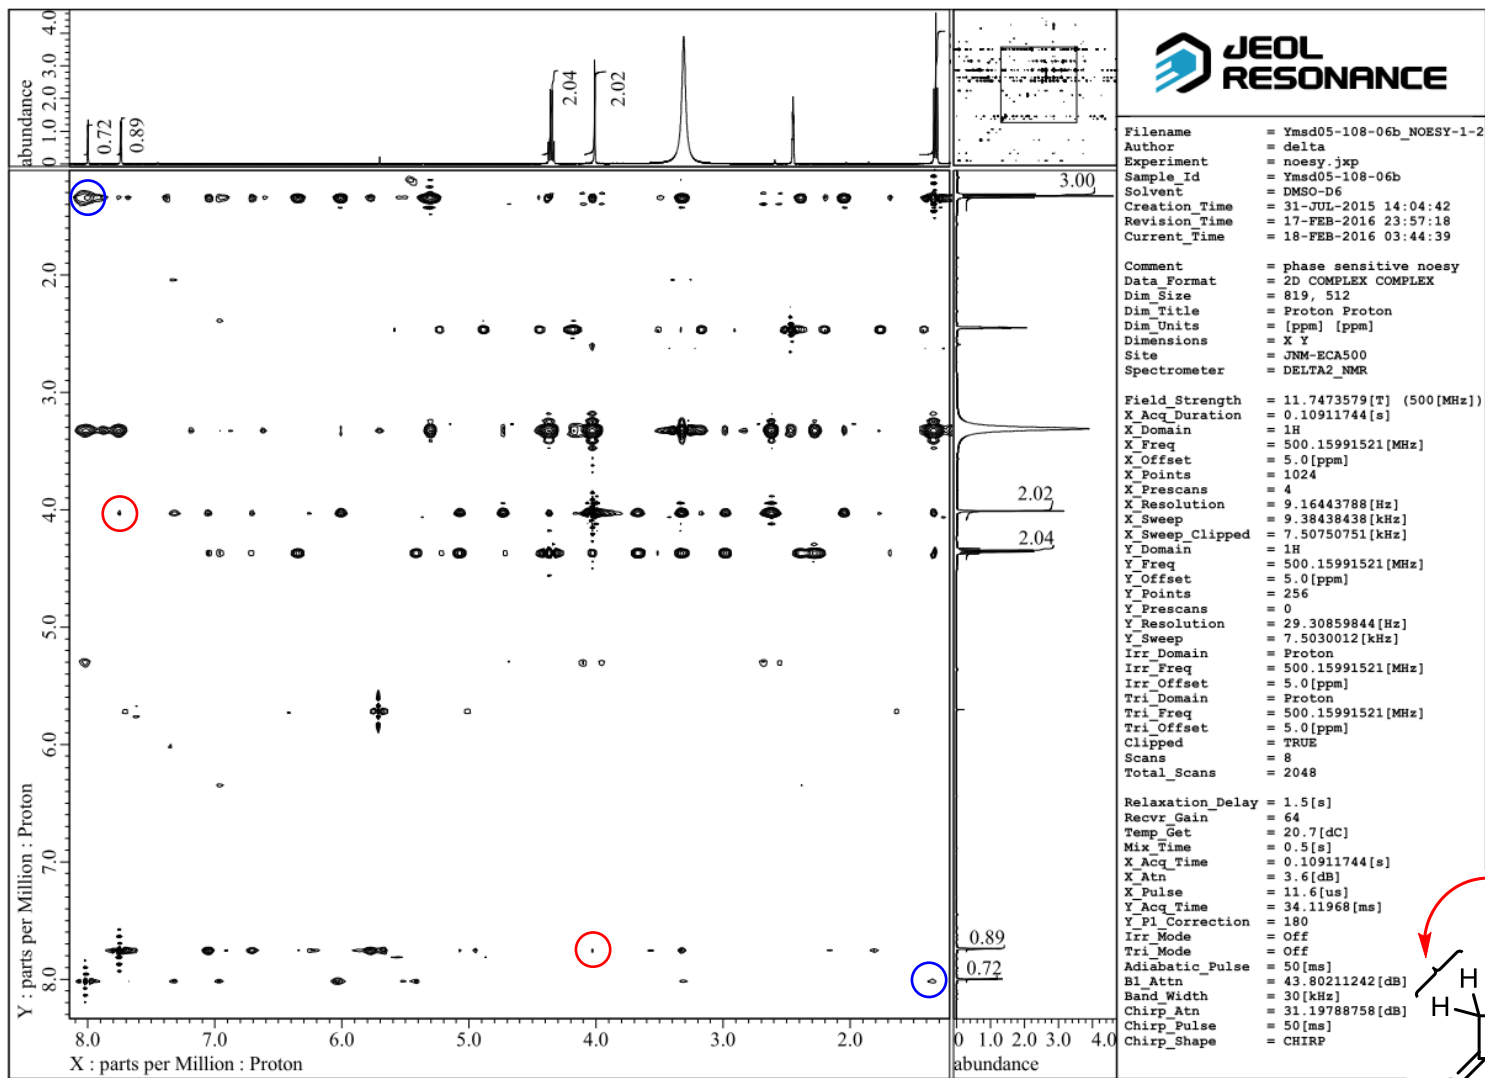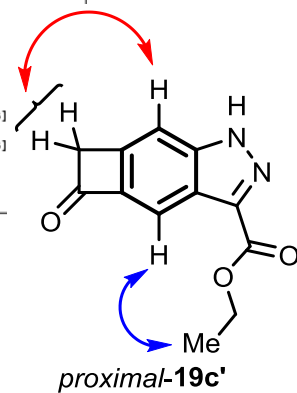



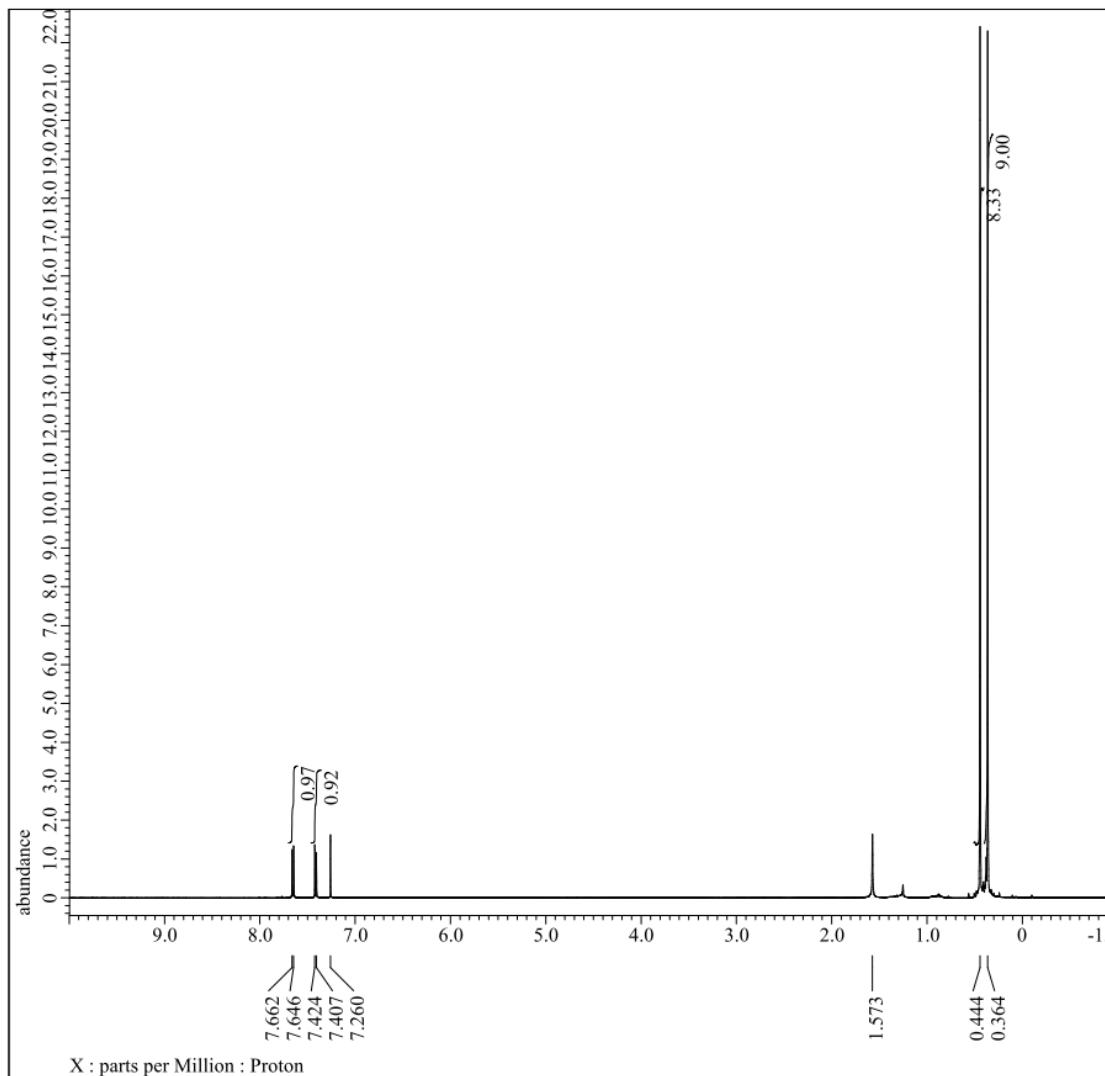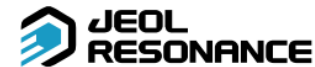

```

Filename      = Ymsdia-05_proton-1-3.jdf
Author       = delta
Experiment   = proton.jxp
Sample_Id    = Ymsdia-05
Solvent      = CHLOROFORM-D
Creation_Time = 25-AUG-2015 00:04:32
Revision_Time = 26-AUG-2015 00:23:46
Current_Time  = 26-AUG-2015 00:29:56

Comment      = single pulse
Data Format   = 1D COMPLEX
Dim Size     = 13107
Dim Title    = Proton
Dim Units    = [ppm]
Dimensions   = X
Site         = JNM-ECA500
Spectrometer = DELTA2_NMR

Field Strength = 11.7473579[T] (500[MHz])
X_Acq_Duration = 1.74587904[s]
X_Domain       = 1H
X_Freq         = 500.15991521[MHz]
X_Offset       = 5.0[ppm]
X_Points       = 16384
X_Prescans     = 1
X_Resolution   = 0.57277737[Hz]
X_Sweep        = 9.38438438[kHz]
X_Sweep_Clipped = 7.50750751[kHz]
Irr_Domain     = Proton
Irr_Freq       = 500.15991521[MHz]
Irr_Offset     = 5.0[ppm]
Tri_Domain     = Proton
Tri_Freq       = 500.15991521[MHz]
Tri_Offset     = 5.0[ppm]
Clipped        = FALSE
Scans          = 16
Total_Scans    = 16

Relaxation_Delay = 2[s]
Recvr_Gain       = 42
Temp_Get         = 20.3[dC]
X_90_Width      = 11.6[us]
X_Acq_Time      = 1.74587904[s]
X_Angle         = 45[deg]
X_Atn           = 3.6[dB]
X_Pulse         = 5.8[us]
Irr_Mode        = Off
Tri_Mode        = Off
Dante_Presat    = FALSE
Initial_Wait    = 1[s]
Repetition_Time = 3.74587904[s]
  
```

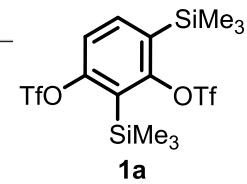

You created this PDF from an application that is not licensed to print to novaPDF printer (<http://www.novapdf.com>)

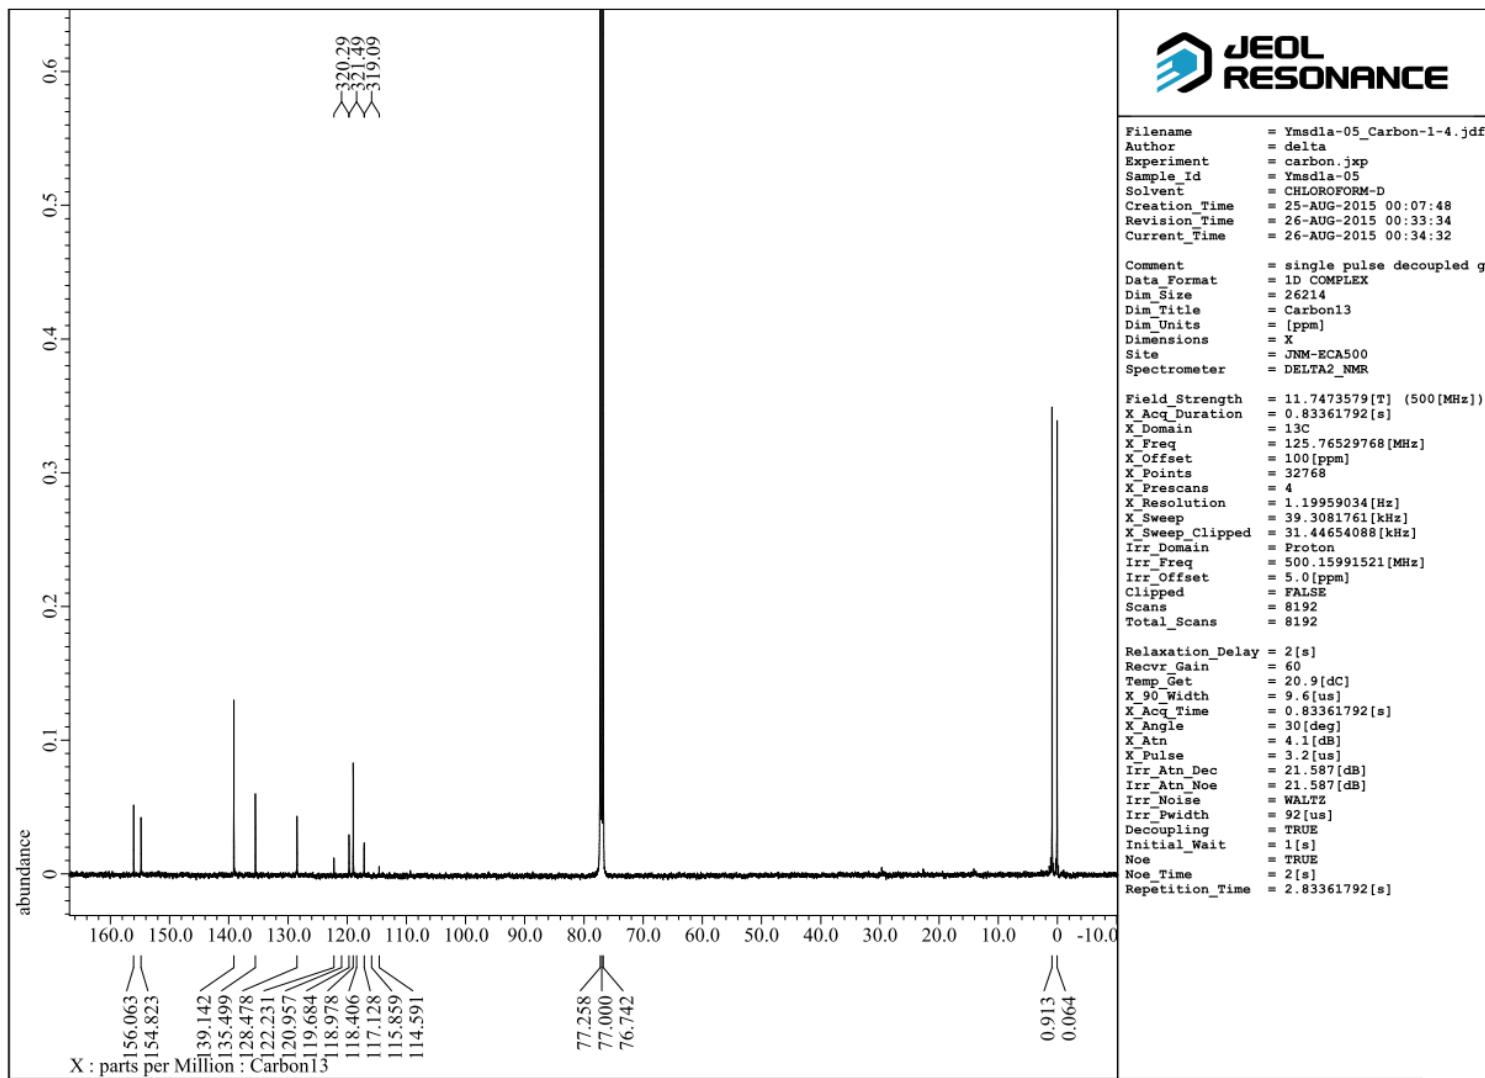

You created this PDF from an application that is not licensed to print to novaPDF printer (<http://www.novapdf.com>)

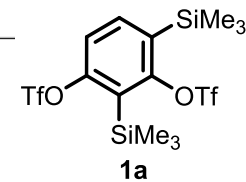

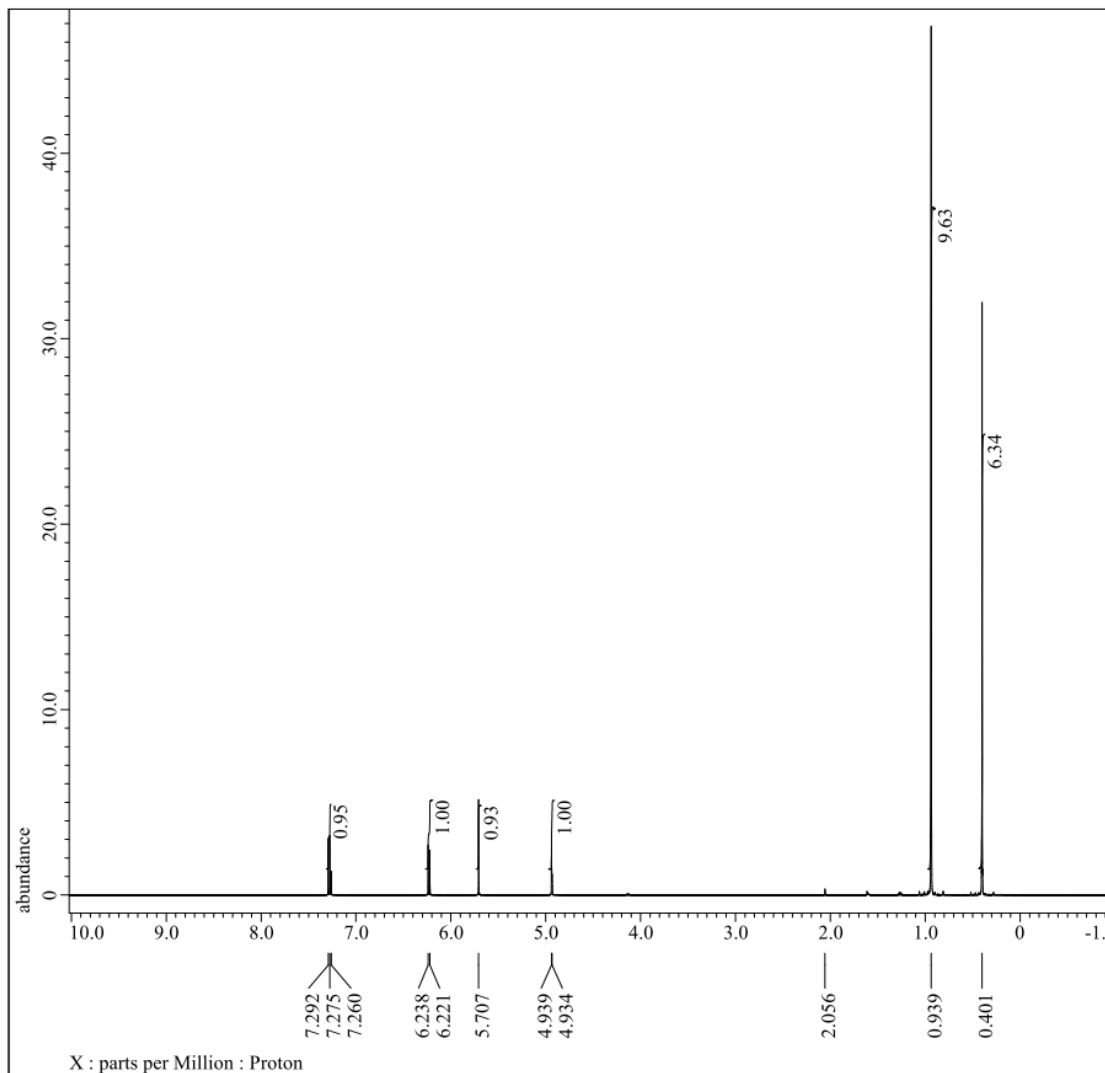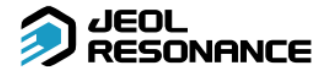

```

Filename      = Ymsd03-128-01_proton-1-3
Author       = delta
Experiment   = proton.jxp
Sample Id    = Ymsd03-127-01
Solvent      = CHLOROFORM-D
Creation_Time = 16-OCT-2014 20:03:43
Revision_Time = 8-APR-2015 14:29:24
Current_Time  = 8-APR-2015 14:30:14

Comment      = single_pulse
Data Format   = 1D COMPLEX
Dim Size     = 13107
Dim Title    = Proton
Dim Units    = [ppm]
Dimensions   = X
Site         = JNM-ECA500
Spectrometer = DELTA2_NMR

Field_Strength = 11.7473579[T] (500[MHz])
X_Acq_Duration = 1.74587904[s]
X_Domain       = 1H
X_Freq         = 500.15991521[MHz]
X_Offset       = 5.0[ppm]
X_Points      = 16384
X_Prescans    = 1
X_Resolution   = 0.57277737[Hz]
X_Sweep       = 9.38438438[kHz]
X_Sweep_Clipped = 7.50750751[kHz]
Irr_Domain    = Proton
Irr_Freq      = 500.15991521[MHz]
Irr_Offset    = 5.0[ppm]
Tri_Domain    = Proton
Tri_Freq      = 500.15991521[MHz]
Tri_Offset    = 5.0[ppm]
Clipped       = FALSE
Scans         = 8
Total_Scans   = 8

Relaxation_Delay = 2[s]
Recvr_Gain       = 38
Temp_Get        = 21.3[dC]
X_90_Width      = 11.6[us]
X_Acq_Time      = 1.74587904[s]
X_Angle         = 45[deg]
X_Atn           = 3.6[dB]
X_Pulse         = 5.8[us]
Irr_Mode        = Off
Tri_Mode        = Off
Dante_Presat    = FALSE
Initial_Wait    = 1[s]
Repetition_Time = 3.74587904[s]
  
```

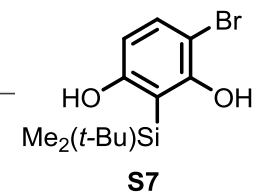

You created this PDF from an application that is not licensed to print to novaPDF printer (<http://www.novapdf.com>)

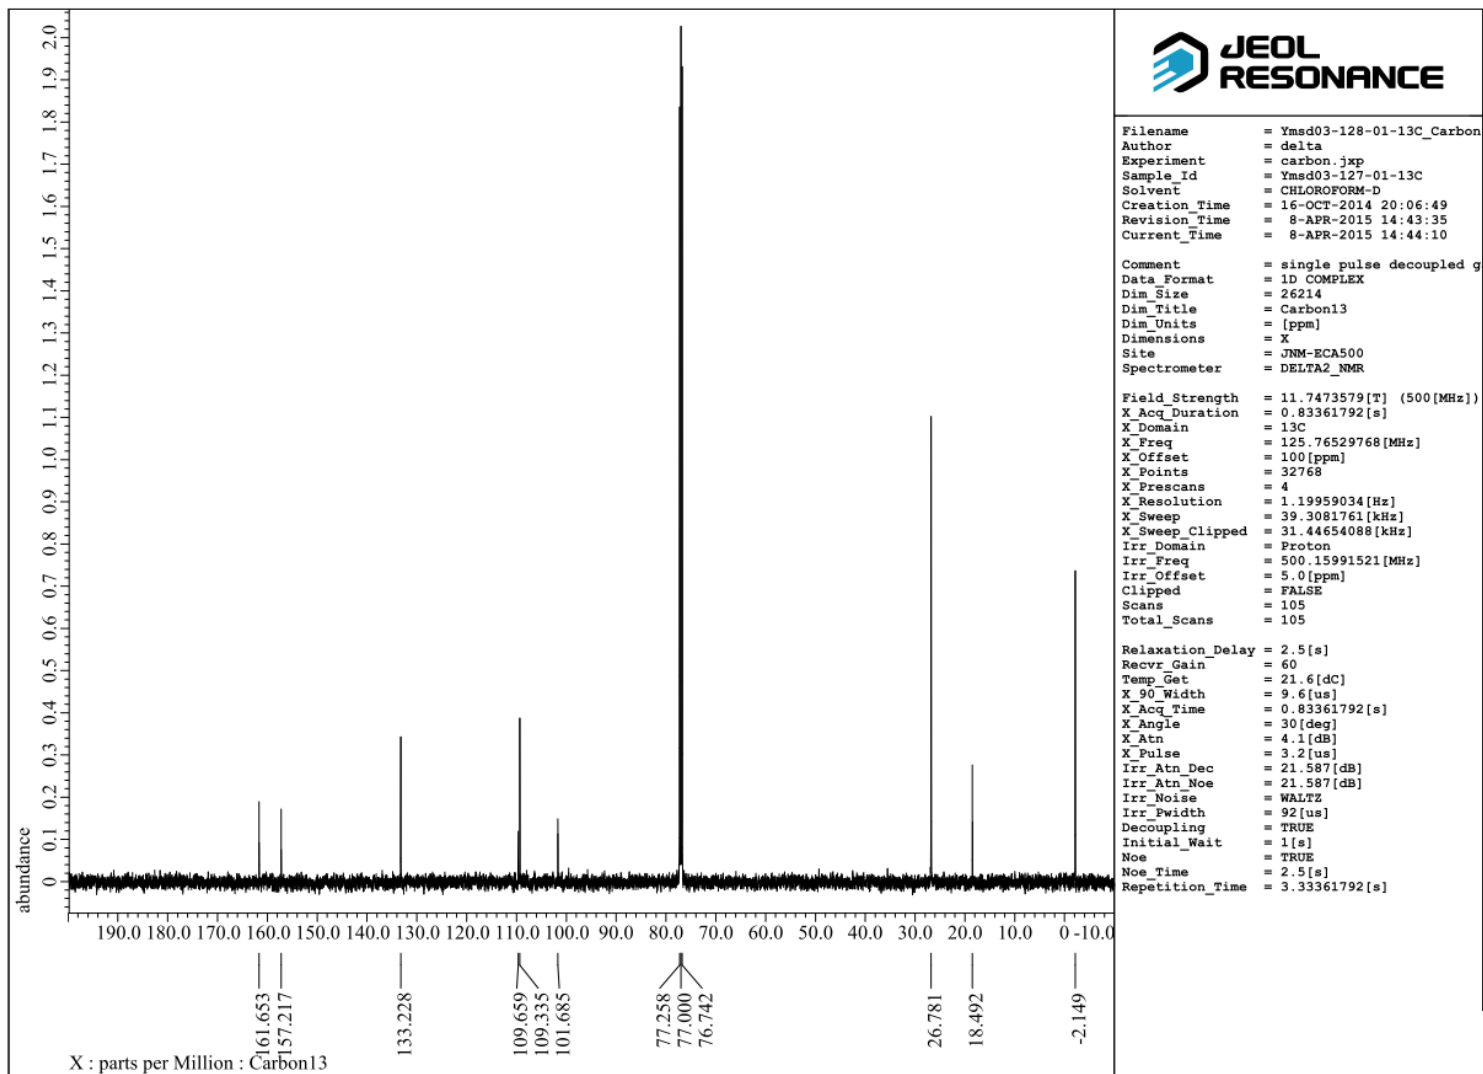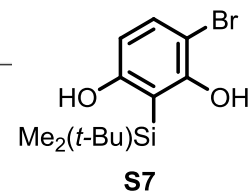

You created this PDF from an application that is not licensed to print to novaPDF printer (<http://www.novapdf.com>)

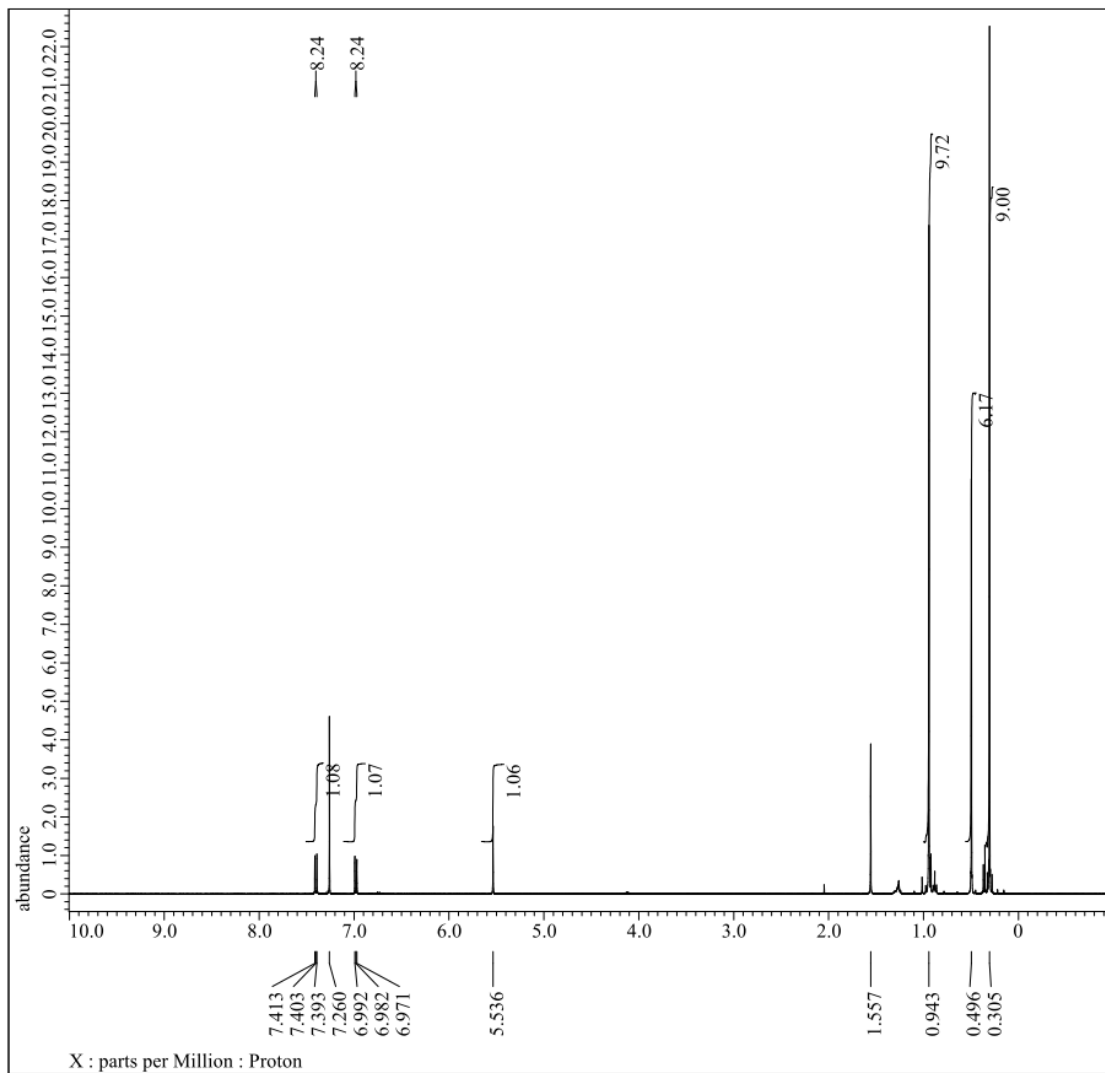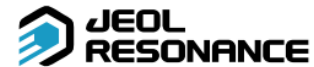

```

Filename      = s32-2.jdf
Author       = delta
Experiment    = proton.jxp
Sample Id     = Ymsd05-007-02
Solvent      = CHLOROFORM-D
Creation Time = 28-APR-2015 21:13:44
Revision Time = 27-AUG-2015 18:24:07
Current Time  = 27-AUG-2015 18:24:35

Comment      = single_pulse
Data Format   = 1D COMPLEX
Dim Size     = 13107
Dim Title    = Proton
Dim Units    = [ppm]
Dimensions   = X
Site         = ECS 400
Spectrometer = DELTA2_NMR

Field Strength = 9.389766 [T] (400 [MHz])
X Acq Duration = 2.18365952 [s]
X Domain       = 1H
X Freq        = 399.78219838 [MHz]
X Offset      = 5 [ppm]
X Points      = 16384
X Prescans    = 1
X Resolution  = 0.45794685 [Hz]
X Sweep       = 7.5030012 [kHz]
X Sweep Clipped = 6.00240096 [kHz]
Irr Domain    = Proton
Irr Freq      = 399.78219838 [MHz]
Irr Offset    = 5 [ppm]
Tri Domain    = Proton
Tri Freq      = 399.78219838 [MHz]
Tri Offset    = 5 [ppm]
Clipped       = FALSE
Scans         = 8
Total Scans   = 8

Relaxation Delay = 2 [s]
Recvr Gain       = 46
Temp Get        = 19.4 [dC]
X 90 Width      = 11.27 [us]
X Acq Time      = 2.18365952 [s]
X Angle         = 45 [deg]
X Atn           = 2.4 [dB]
X Pulse        = 5.635 [us]
Irr Mode        = Off
Tri Mode        = Off
Dante Presat   = FALSE
Initial Wait    = 1 [s]
Repetition Time = 4.18365952 [s]

```

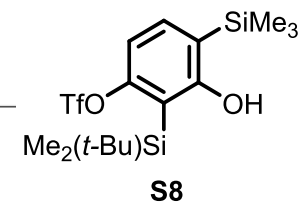

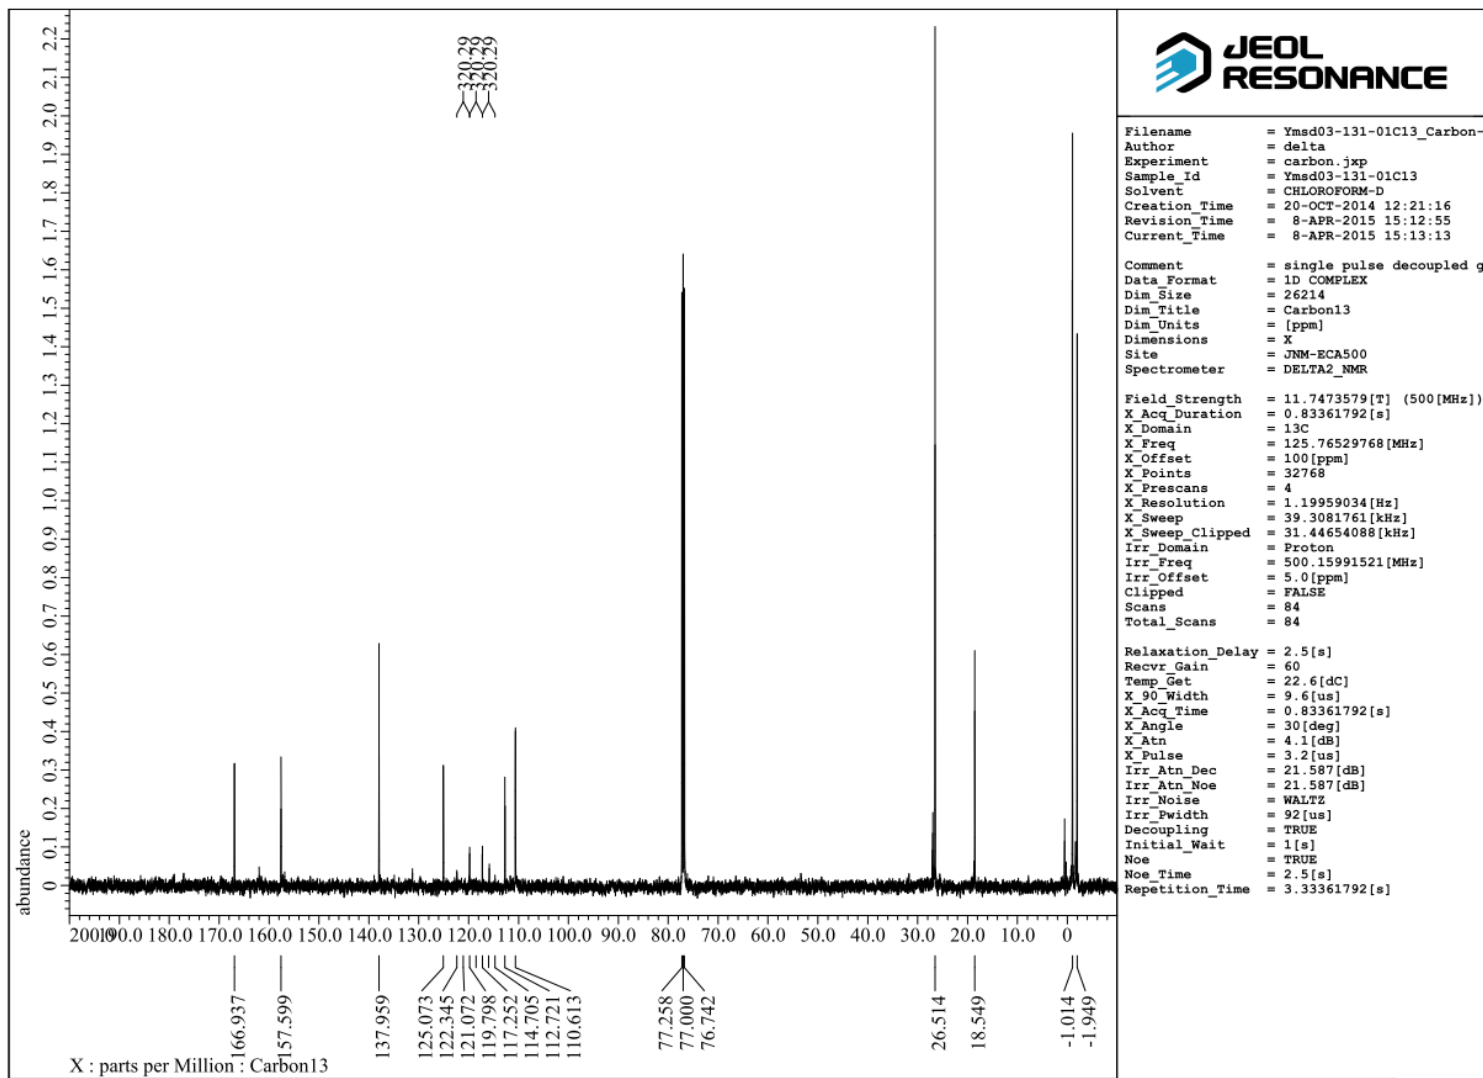

You created this PDF from an application that is not licensed to print to novaPDF printer (<http://www.novapdf.com>)

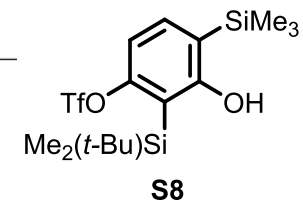

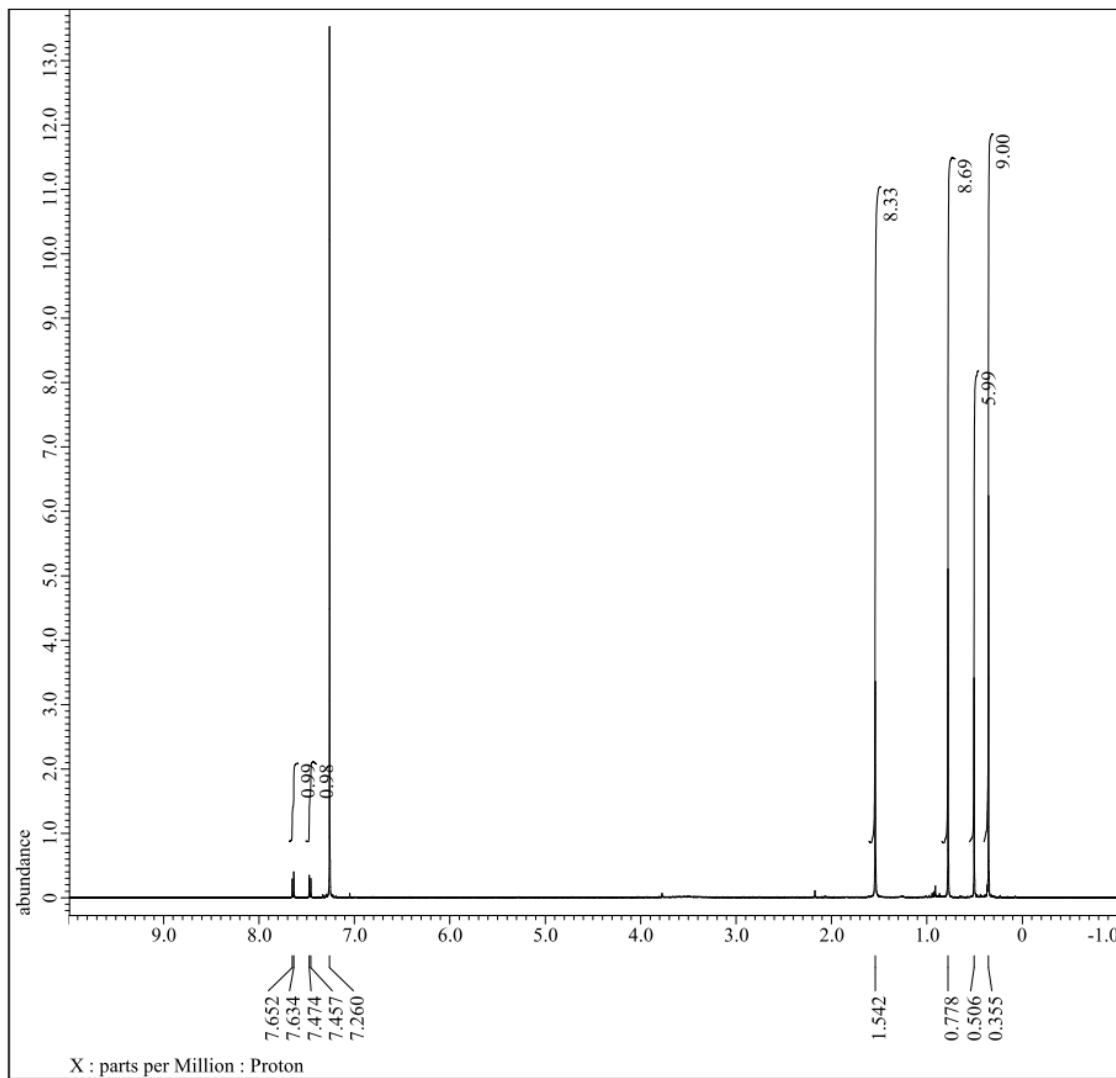

```

Filename      = Ymsd03-006-03_proton-1-3
Author       = delta
Experiment   = proton.jxp
Sample_Id    = Ymsd03-006-03
Solvent      = CHLOROFORM-D
Creation_Time = 19-MAY-2014 17:49:04
Revision_Time = 8-APR-2015 00:32:54
Current_Time  = 8-APR-2015 00:33:28

Comment      = single pulse
Data Format   = 1D COMPLEX
Dim Size     = 13107
Dim Title    = Proton
Dim Units    = [ppm]
Dimensions   = X
Site         = JNM-ECA500
Spectrometer = DELTA2_NMR

Field Strength = 11.7473579[T] (500[MHz])
X_Acq_Duration = 1.74587904[s]
X_Domain       = 1H
X_Freq         = 500.15991521[MHz]
X_Offset       = 5.0[ppm]
X_Points       = 16384
X_Prescans     = 1
X_Resolution   = 0.57277737 [Hz]
X_Sweep        = 9.38438438 [kHz]
X_Sweep_Clipped = 7.50750751 [kHz]
Irr_Domain     = Proton
Irr_Freq       = 500.15991521[MHz]
Irr_Offset     = 5.0[ppm]
Tri_Domain     = Proton
Tri_Freq       = 500.15991521[MHz]
Tri_Offset     = 5.0[ppm]
Clipped        = FALSE
Scans          = 16
Total_Scans    = 16

Relaxation_Delay = 2[s]
Recvr_Gain       = 58
Temp_Get         = 20.7 [dC]
X_90_Width      = 11.6 [us]
X_Acq_Time      = 1.74587904[s]
X_Angle         = 45 [deg]
X_Atn           = 3.6 [dB]
X_Pulse         = 5.8 [us]
Irr_Mode        = Off
Tri_Mode        = Off
Dante_Presat    = FALSE
Initial_Wait    = 1[s]
Repetition_Time = 3.74587904[s]
  
```

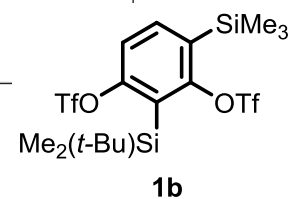

You created this PDF from an application that is not licensed to print to novaPDF printer (<http://www.novapdf.com>)

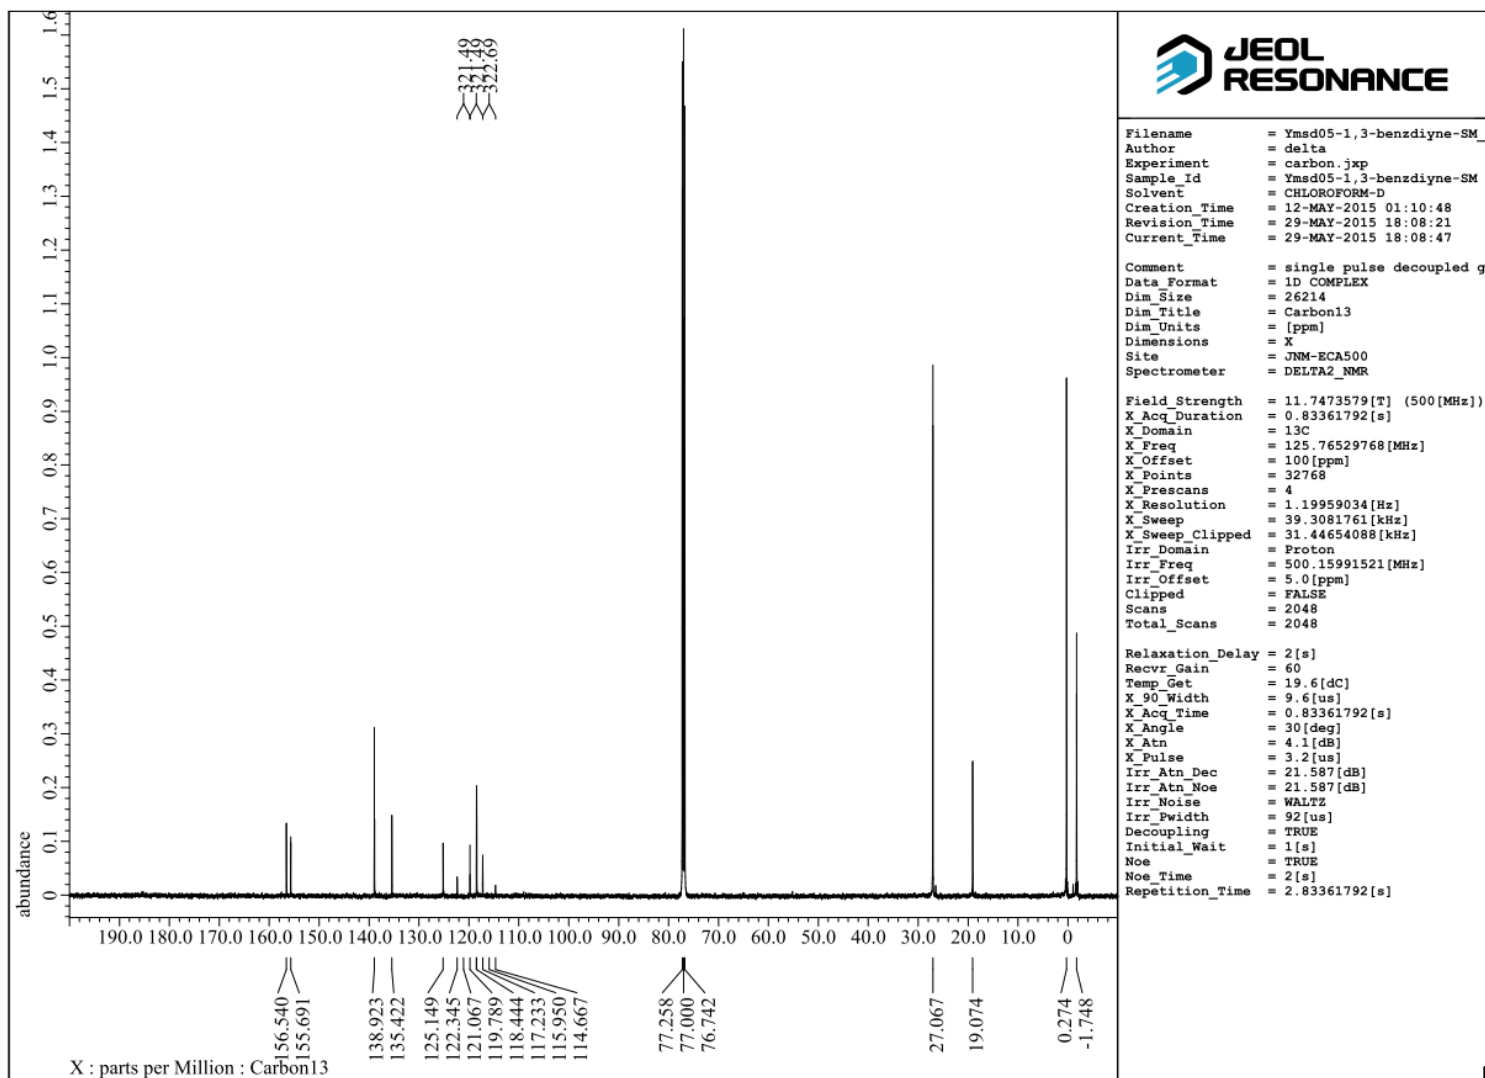

You created this PDF from an application that is not licensed to print to novaPDF printer (<http://www.novapdf.com>)

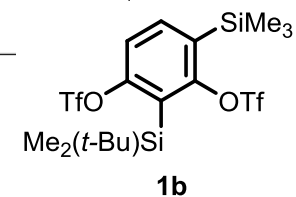



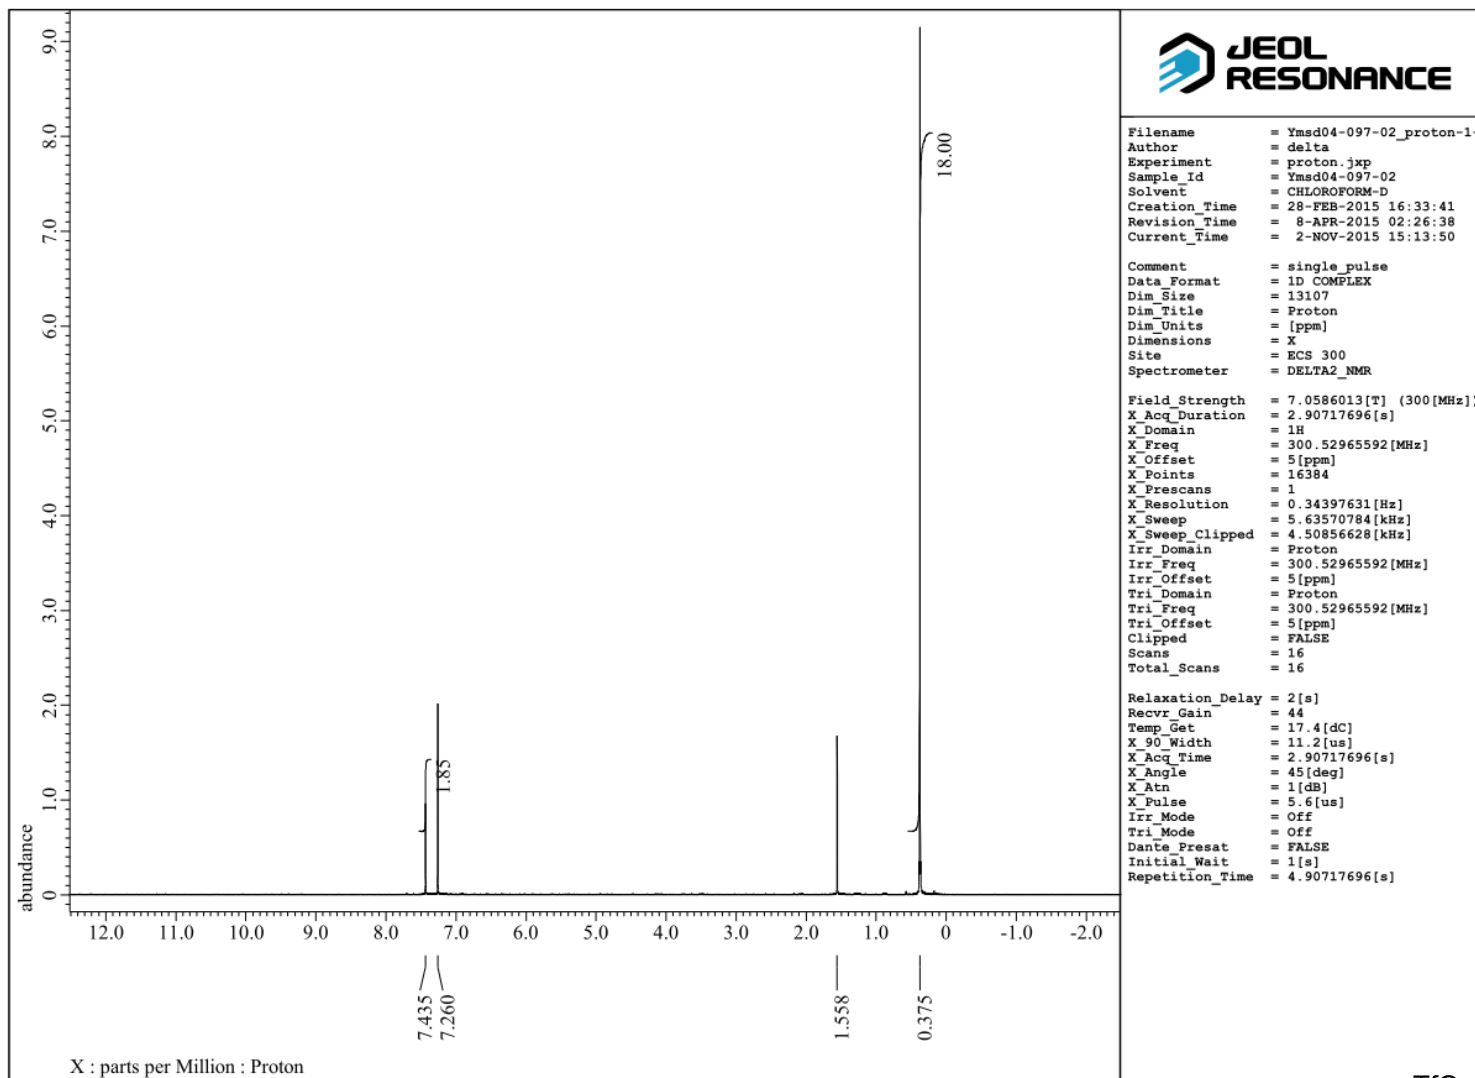

You created this PDF from an application that is not licensed to print to novaPDF printer (<http://www.novapdf.com>)

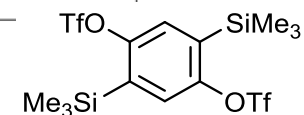

15

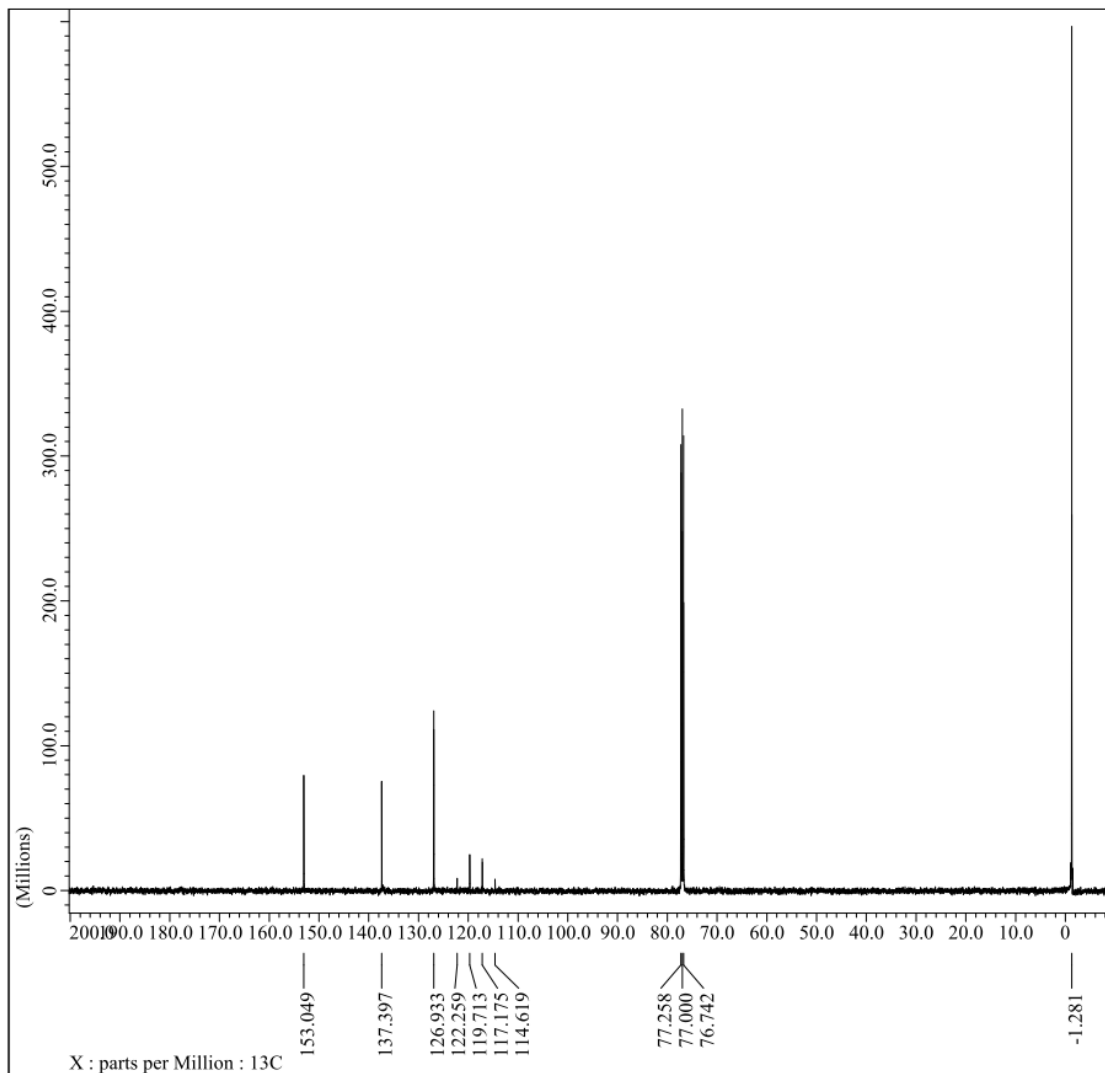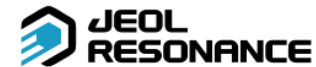

```

Filename      = Ymsd1,4-SM-C-1.jdf
Author       = delta
Experiment   = single_pulse_dec
Sample_Id    = S#44119
Solvent      = CHLOROFORM-D
Creation_Time = 18-JAN-2013 01:21:46
Revision_Time = 4-APR-2015 22:10:58
Current_Time  = 8-APR-2015 00:54:57

Comment      = single pulse decoupled g
Data_Format  = 1D COMPLEX
Dim_Size     = 26214
Dim_Title    = 13C
Dim_Units    = [ppm]
Dimensions   = X
Site         = ECA500
Spectrometer = DELTA2_NMR

Field_Strength = 11.7473579[T] (500[MHz])
X_Acq_Duration = 0.83361792[s]
X_Domain      = 13C
X_Freq        = 125.76529768 [MHz]
X_Offset      = 100[ppm]
X_Points      = 32768
X_Prescans    = 4
X_Resolution  = 1.19959034 [Hz]
X_Sweep       = 39.3081761 [kHz]
Irr_Domain    = 1H
Irr_Freq      = 500.15991521 [MHz]
Irr_Offset    = 5.0[ppm]
Scans         = 293
Total_Scans   = 293

Relaxation_Delay = 2[s]
Recvr_Gain       = 60
Temp_Get         = 18.8[dC]
X_90_Width      = 10[us]
X_Acq_Time      = 0.83361792[s]
X_Angle         = 30[deg]
X_Atn           = 6.3[dB]
X_Pulse         = 3.33333333[us]
Irr_Atn_Dec     = 22.35[dB]
Irr_Atn_No     = 22.35[dB]
Irr_Noise       = WALTZ
Decoupling      = TRUE
Initial_Wait    = 1[s]
Noe              = TRUE
Noe_Time        = 2[s]
Repetition_Time = 2.83361792[s]

```

You created this PDF from an application that is not licensed to print to novaPDF printer (<http://www.novapdf.com>)

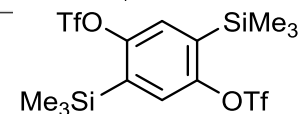

15
